# Supplementary material
Source: publisher figshare collection journal article supplement (https://acs.figshare.com/ndownloader/files/3782260)
Supplement: Supplementary file 1 [file 3782260]

_publ_requested_journal          ' Inorg. Chem.'
_publ_contact_author_name        'Prof. Jan J. Wegand'
_publ_contact_author_address     
;Department of Chemistry and Food Chemistry
Chair Inorganic Molecular Chemistry
TU Dresden 
01062 Dresden, Germany
;
_publ_contact_author_email       jan.weigand@tu-dresden.de
_publ_contact_author_phone       +4935146342800
loop_
_publ_author_name
_publ_author_address
'Wegand, Jan J. '
;Department of Chemistry and Food Chemistry
Chair Inorganic Molecular Chemistry
TU Dresden 
01062 Dresden, Germany
;
'Dickschat, Arne T.'
;Department of Chemistry and Food Chemistry
Chair Inorganic Molecular Chemistry
TU Dresden 
01062 Dresden, Germany
;
'Hennersdorf, F.'
;Department of Chemistry and Food Chemistry
Chair Inorganic Molecular Chemistry
TU Dresden 
01062 Dresden, Germany
;
'Feldmann, Kai-Oliver'
;Department of Chemistry and Food Chemistry
Chair Inorganic Molecular Chemistry
TU Dresden 
01062 Dresden, Germany
;
'Henne, Florian D.'
;Department of Chemistry and Food Chemistry
Chair Inorganic Molecular Chemistry
TU Dresden 
01062 Dresden, Germany
;
_audit_creation_date             2015-01-02
_audit_creation_method           
;
Olex2 1.2
(compiled 2014.12.26 svn.r3119 for OlexSys, GUI svn.r4975)
;
_publ_section_references         
;
Dolomanov, O.V., Bourhis, L.J., Gildea, R.J, Howard, J.A.K. & Puschmann, H.
 (2009), J. Appl. Cryst. 42, 339-341.

Sheldrick, G.M. (2008). Acta Cryst. A64, 112-122.
;
shelxl_version_number            2013-4
_publ_contact_author_address      ?
_publ_contact_author_email        ?
_publ_contact_author_name         ''
_publ_contact_author_phone        ?
_publ_section_references
;
Dolomanov, O.V., Bourhis, L.J., Gildea, R.J, Howard, J.A.K. & Puschmann, H.
 (2009), J. Appl. Cryst. 42, 339-341.

Sheldrick, G.M. (2008). Acta Cryst. A64, 112-122.
;
_chemical_name_common             ?
_chemical_name_systematic
;
 ?
;
_chemical_formula_moiety          'C29 H36 N4 P, C F3 O3 S, C H2 Cl2'
_chemical_formula_sum             'C31 H38 Cl2 F3 N4 O3 P S'
_chemical_formula_weight          705.58
_chemical_melting_point           ?
loop_
  _atom_type_symbol
  _atom_type_description
  _atom_type_scat_dispersion_real
  _atom_type_scat_dispersion_imag
  _atom_type_scat_source
 'C' 'C' 0.0033 0.0016 'International Tables Vol C Tables 4.2.6.8 and 6.1.1.4'
 'H' 'H' 0.0000 0.0000 'International Tables Vol C Tables 4.2.6.8 and 6.1.1.4'
 'Cl' 'Cl' 0.1484 0.1585 'International Tables Vol C Tables 4.2.6.8 and 6.1.1.4'
 'F' 'F' 0.0171 0.0103 'International Tables Vol C Tables 4.2.6.8 and 6.1.1.4'
 'N' 'N' 0.0061 0.0033 'International Tables Vol C Tables 4.2.6.8 and 6.1.1.4'
 'O' 'O' 0.0106 0.0060 'International Tables Vol C Tables 4.2.6.8 and 6.1.1.4'
 'P' 'P' 0.1023 0.0942 'International Tables Vol C Tables 4.2.6.8 and 6.1.1.4'
 'S' 'S' 0.1246 0.1234 'International Tables Vol C Tables 4.2.6.8 and 6.1.1.4'

_shelx_space_group_comment
;
The symmetry employed for this shelxl refinement is uniquely defined
by the following loop, which should always be used as a source of
symmetry information in preference to the above space-group names.
They are only intended as comments.
;
_space_group_crystal_system       'monoclinic'
_space_group_IT_number            14
_space_group_name_H-M_alt         'P 1 21/c 1'
_space_group_name_Hall            '-P 2ybc'
loop_
  _space_group_symop_operation_xyz
 'x, y, z'
 '-x, y+1/2, -z+1/2'
 '-x, -y, -z'
 'x, -y-1/2, z-1/2'

_cell_length_a                    10.5148(7)
_cell_length_b                    19.7085(12)
_cell_length_c                    17.2472(11)
_cell_angle_alpha                 90
_cell_angle_beta                  97.7430(10)
_cell_angle_gamma                 90
_cell_volume                      3541.6(4)
_cell_formula_units_Z             4
_cell_measurement_reflns_used     9907
_cell_measurement_temperature     153(2)
_cell_measurement_theta_max       30.027
_cell_measurement_theta_min       2.211
_shelx_estimated_absorpt_T_max    0.980
_shelx_estimated_absorpt_T_min    0.926
_exptl_absorpt_coefficient_mu     0.340
_exptl_absorpt_correction_T_max   1
_exptl_absorpt_correction_T_min   0.894767
_exptl_absorpt_correction_type    multi-scan
_exptl_absorpt_process_details
;
SADABS-2004/1 (Bruker,2004) was used for absorption correction.
R(int) was 0.0450 before and 0.0189 after correction.
The Ratio of minimum to maximum transmission is 0.8948.
The \l/2 correction factor is 0.0015.
;
_exptl_crystal_colour             'clear colourless'
_exptl_crystal_density_diffrn     1.323
_exptl_crystal_density_meas       .
_exptl_crystal_density_method     ?
_exptl_crystal_description        'rod'
_exptl_crystal_F_000              1472
_exptl_crystal_size_max           0.23
_exptl_crystal_size_mid           0.06
_exptl_crystal_size_min           0.06
_exptl_special_details
;
 ?
;
_exptl_transmission_factor_max    ?
_exptl_transmission_factor_min    ?
_diffrn_reflns_av_R_equivalents   0.0206
_diffrn_reflns_av_unetI/netI      0.0167
_diffrn_reflns_Laue_measured_fraction_full 1.000
_diffrn_reflns_Laue_measured_fraction_max 1.000
_diffrn_reflns_limit_h_max        13
_diffrn_reflns_limit_h_min        -13
_diffrn_reflns_limit_k_max        25
_diffrn_reflns_limit_k_min        -25
_diffrn_reflns_limit_l_max        22
_diffrn_reflns_limit_l_min        -22
_diffrn_reflns_number             35744
_diffrn_reflns_point_group_measured_fraction_full 1.000
_diffrn_reflns_point_group_measured_fraction_max 1.000
_diffrn_reflns_theta_full         26.000
_diffrn_reflns_theta_max          27.878
_diffrn_reflns_theta_min          1.577
_diffrn_ambient_temperature       153.15
_diffrn_detector_area_resol_mean  ?
_diffrn_measured_fraction_theta_full 1.000
_diffrn_measured_fraction_theta_max 1.000
_diffrn_measurement_device_type   'CCD area detector'
_diffrn_measurement_method        'phi and omega scans'
_diffrn_radiation_monochromator   'graphite'
_diffrn_radiation_type            MoK\a
_diffrn_radiation_wavelength      0.71073
_diffrn_source                    ?
_reflns_Friedel_coverage          0.000
_reflns_Friedel_fraction_full     .
_reflns_Friedel_fraction_max      .
_reflns_number_gt                 7281
_reflns_number_total              8443
_reflns_special_details
;
 Reflections were merged by SHELXL according to the crystal
 class for the calculation of statistics and refinement.
 
 _reflns_Friedel_fraction is defined as the number of unique
 Friedel pairs measured divided by the number that would be
 possible theoretically, ignoring centric projections and
 systematic absences.
;
_reflns_threshold_expression      'I > 2\s(I)'
_computing_cell_refinement        ?
_computing_data_collection        ?
_computing_data_reduction         ?
_computing_molecular_graphics     'Olex2 (Dolomanov et al., 2009)'
_computing_publication_material   'Olex2 (Dolomanov et al., 2009)'
_computing_structure_refinement   'XL (Sheldrick, 2008)'
_computing_structure_solution     'ShelXS (Sheldrick, 2008)'
_refine_diff_density_max          0.863
_refine_diff_density_min          -0.883
_refine_diff_density_rms          0.059
_refine_ls_extinction_coef        .
_refine_ls_extinction_method      none
_refine_ls_goodness_of_fit_ref    1.020
_refine_ls_hydrogen_treatment     constr
_refine_ls_matrix_type            full
_refine_ls_number_parameters      445
_refine_ls_number_reflns          8443
_refine_ls_number_restraints      26
_refine_ls_R_factor_all           0.0575
_refine_ls_R_factor_gt            0.0497
_refine_ls_restrained_S_all       1.019
_refine_ls_shift/su_max           0.001
_refine_ls_shift/su_mean          0.000
_refine_ls_structure_factor_coef  Fsqd
_refine_ls_weighting_details
'w=1/[\s^2^(Fo^2^)+(0.0649P)^2^+3.1579P] where P=(Fo^2^+2Fc^2^)/3'
_refine_ls_weighting_scheme       calc
_refine_ls_wR_factor_gt           0.1273
_refine_ls_wR_factor_ref          0.1343
_refine_special_details
;
 ?
;
_olex2_refinement_description
;
1. Fixed Uiso
 At 1.2 times of:
  All C(H) groups, All C(H,H) groups
 At 1.5 times of:
  All C(H,H,H) groups
2. Restrained distances
 F1-C30A \\sim F3A-C30A \\sim F2-C30B \\sim F2-C30A \\sim F3B-C30B
 with sigma of 0.02
 S1A-C30A \\sim S1A-C30B
 with sigma of 0.005
 S1A-O1A \\sim S1A-O2A \\sim S1A-O3A \\sim S1B-O1B \\sim S1B-O2B \\sim S1B-O3B
 with sigma of 0.02
3. Uiso/Uaniso restraints and constraints
Uanis(C30B) = Uanis(C30A)
Uanis(O2B) = Uanis(O2A)
Uanis(O3B) = Uanis(O3A)
Uanis(F3A) = Uanis(O1B)
4. Others
 Sof(O2B)=Sof(O3B)=Sof(S1B)=Sof(O1B)=Sof(F3B)=Sof(C30B)=1-FVAR(1)
 Sof(C30A)=Sof(O1A)=Sof(F3A)=Sof(S1A)=Sof(O2A)=Sof(O3A)=FVAR(1)
5.a Ternary CH refined with riding coordinates:
 C10(H10), C13(H13), C22(H22), C25(H25)
5.b Secondary CH2 refined with riding coordinates:
 C32(H32A,H32B)
5.c Aromatic/amide H refined with riding coordinates:
 C2(H2), C3(H3), C6(H6), C7(H7), C8(H8), C18(H18), C19(H19), C20(H20)
5.d Idealised Me refined as rotating group:
 C11(H11A,H11B,H11C), C12(H12A,H12B,H12C), C15(H15A,H15B,H15C), C14(H14A,H14B,
 H14C), C23(H23A,H23B,H23C), C24(H24A,H24B,H24C), C27(H27A,H27B,H27C), C26(H26A,
 H26B,H26C)
;
_atom_sites_solution_hydrogens    geom
_atom_sites_solution_primary      direct
_atom_sites_solution_secondary    ?
loop_
  _atom_site_label
  _atom_site_type_symbol
  _atom_site_fract_x
  _atom_site_fract_y
  _atom_site_fract_z
  _atom_site_U_iso_or_equiv
  _atom_site_adp_type
  _atom_site_occupancy
  _atom_site_site_symmetry_order
  _atom_site_calc_flag
  _atom_site_refinement_flags_posn
  _atom_site_refinement_flags_adp
  _atom_site_refinement_flags_occupancy
  _atom_site_disorder_assembly
  _atom_site_disorder_group
 C1 C 0.32140(15) 0.77047(8) 0.47943(9) 0.0206(3) Uani 1 1 d . . . . .
 C2 C 0.33421(19) 0.79984(10) 0.60480(10) 0.0300(4) Uani 1 1 d . . . . .
 H2 H 0.3344 0.7972 0.6598 0.036 Uiso 1 1 calc R . . . .
 C3 C 0.35276(19) 0.85626(10) 0.56311(10) 0.0302(4) Uani 1 1 d . . . . .
 H3 H 0.3686 0.9007 0.5835 0.036 Uiso 1 1 calc R . . . .
 C28 C 0.13894(18) 0.71321(10) 0.37306(10) 0.0284(4) Uani 1 1 d . . . . .
 C29 C 0.34967(19) 0.76214(10) 0.32265(10) 0.0301(4) Uani 1 1 d . . . . .
 C4 C 0.28331(17) 0.67732(9) 0.57034(9) 0.0242(3) Uani 1 1 d . . . . .
 C5 C 0.15436(18) 0.66313(10) 0.57732(11) 0.0304(4) Uani 1 1 d . . . . .
 C6 C 0.1274(2) 0.59621(12) 0.59568(13) 0.0388(5) Uani 1 1 d . . . . .
 H6 H 0.0417 0.5839 0.6011 0.047 Uiso 1 1 calc R . . . .
 C7 C 0.2226(2) 0.54729(11) 0.60625(13) 0.0395(5) Uani 1 1 d . . . . .
 H7 H 0.2013 0.5021 0.6187 0.047 Uiso 1 1 calc R . . . .
 C8 C 0.3479(2) 0.56338(10) 0.59889(12) 0.0344(4) Uani 1 1 d . . . . .
 H8 H 0.4120 0.5292 0.6065 0.041 Uiso 1 1 calc R . . . .
 C9 C 0.38190(18) 0.62934(9) 0.58043(10) 0.0269(4) Uani 1 1 d . . . . .
 C10 C 0.0502(2) 0.71722(12) 0.56785(13) 0.0396(5) Uani 1 1 d . . . . .
 H10 H 0.0766 0.7530 0.5321 0.048 Uiso 1 1 calc R . . . .
 C11 C -0.0793(2) 0.68930(17) 0.53124(17) 0.0597(7) Uani 1 1 d . . . . .
 H11A H -0.0691 0.6654 0.4826 0.090 Uiso 1 1 calc GR . . . .
 H11B H -0.1401 0.7268 0.5198 0.090 Uiso 1 1 calc GR . . . .
 H11C H -0.1119 0.6577 0.5678 0.090 Uiso 1 1 calc GR . . . .
 C12 C 0.0361(3) 0.75117(16) 0.64676(16) 0.0567(7) Uani 1 1 d . . . . .
 H12A H 0.0036 0.7180 0.6815 0.085 Uiso 1 1 calc GR . . . .
 H12B H -0.0242 0.7892 0.6380 0.085 Uiso 1 1 calc GR . . . .
 H12C H 0.1199 0.7679 0.6709 0.085 Uiso 1 1 calc GR . . . .
 C13 C 0.52089(18) 0.64595(10) 0.57367(11) 0.0307(4) Uani 1 1 d . . . . .
 H13 H 0.5241 0.6923 0.5505 0.037 Uiso 1 1 calc R . . . .
 C15 C 0.6009(2) 0.64664(13) 0.65480(13) 0.0413(5) Uani 1 1 d . . . . .
 H15A H 0.5634 0.6789 0.6886 0.062 Uiso 1 1 calc GR . . . .
 H15B H 0.6890 0.6603 0.6499 0.062 Uiso 1 1 calc GR . . . .
 H15C H 0.6014 0.6011 0.6778 0.062 Uiso 1 1 calc GR . . . .
 C14 C 0.5777(2) 0.59573(13) 0.51986(13) 0.0419(5) Uani 1 1 d . . . . .
 H14A H 0.5816 0.5504 0.5435 0.063 Uiso 1 1 calc GR . . . .
 H14B H 0.6645 0.6103 0.5126 0.063 Uiso 1 1 calc GR . . . .
 H14C H 0.5236 0.5943 0.4690 0.063 Uiso 1 1 calc GR . . . .
 C16 C 0.35690(16) 0.88537(8) 0.42278(9) 0.0212(3) Uani 1 1 d . . . . .
 C17 C 0.24383(17) 0.91067(9) 0.38020(10) 0.0259(3) Uani 1 1 d . . . . .
 C18 C 0.2591(2) 0.95750(10) 0.32166(11) 0.0344(4) Uani 1 1 d . . . . .
 H18 H 0.1853 0.9763 0.2914 0.041 Uiso 1 1 calc R . . . .
 C19 C 0.3795(2) 0.97708(10) 0.30679(12) 0.0368(4) Uani 1 1 d . . . . .
 H19 H 0.3874 1.0090 0.2664 0.044 Uiso 1 1 calc R . . . .
 C20 C 0.4886(2) 0.95090(10) 0.34984(11) 0.0313(4) Uani 1 1 d . . . . .
 H20 H 0.5706 0.9648 0.3385 0.038 Uiso 1 1 calc R . . . .
 C21 C 0.47979(17) 0.90422(9) 0.40990(10) 0.0244(3) Uani 1 1 d . . . . .
 C22 C 0.11183(18) 0.88905(10) 0.39684(12) 0.0333(4) Uani 1 1 d . . . . .
 H22 H 0.1204 0.8430 0.4213 0.040 Uiso 1 1 calc R . . . .
 C23 C 0.0157(3) 0.88360(16) 0.32249(18) 0.0626(8) Uani 1 1 d . . . . .
 H23A H -0.0073 0.9292 0.3027 0.094 Uiso 1 1 calc GR . . . .
 H23B H -0.0615 0.8601 0.3342 0.094 Uiso 1 1 calc GR . . . .
 H23C H 0.0543 0.8580 0.2828 0.094 Uiso 1 1 calc GR . . . .
 C24 C 0.0631(3) 0.93689(17) 0.4555(2) 0.0749(11) Uani 1 1 d . . . . .
 H24A H 0.1240 0.9376 0.5038 0.112 Uiso 1 1 calc GR . . . .
 H24B H -0.0208 0.9212 0.4671 0.112 Uiso 1 1 calc GR . . . .
 H24C H 0.0546 0.9827 0.4334 0.112 Uiso 1 1 calc GR . . . .
 C25 C 0.60149(18) 0.87595(10) 0.45572(12) 0.0322(4) Uani 1 1 d . . . . .
 H25 H 0.5770 0.8451 0.4973 0.039 Uiso 1 1 calc R . . . .
 C27 C 0.6851(2) 0.93273(12) 0.49508(15) 0.0447(5) Uani 1 1 d . . . . .
 H27A H 0.7126 0.9625 0.4550 0.067 Uiso 1 1 calc GR . . . .
 H27B H 0.7607 0.9131 0.5266 0.067 Uiso 1 1 calc GR . . . .
 H27C H 0.6357 0.9590 0.5289 0.067 Uiso 1 1 calc GR . . . .
 C26 C 0.6775(3) 0.83465(16) 0.4020(2) 0.0661(9) Uani 1 1 d . . . . .
 H26A H 0.6252 0.7964 0.3798 0.099 Uiso 1 1 calc GR . . . .
 H26B H 0.7564 0.8175 0.4323 0.099 Uiso 1 1 calc GR . . . .
 H26C H 0.6994 0.8637 0.3596 0.099 Uiso 1 1 calc GR . . . .
 C30A C 0.1513(2) 0.53253(11) 0.32114(13) 0.0356(5) Uani 0.9478(17) 1 d . . P
 A 1
 C32 C 0.7413(4) 0.8119(2) 0.76301(17) 0.0767(10) Uani 1 1 d . . . . .
 H32A H 0.8337 0.8223 0.7765 0.092 Uiso 1 1 calc R . . . .
 H32B H 0.7301 0.7625 0.7696 0.092 Uiso 1 1 calc R . . . .
 N1 N 0.31506(14) 0.74703(7) 0.55238(8) 0.0230(3) Uani 1 1 d . . . . .
 N2 N 0.34439(14) 0.83745(7) 0.48557(8) 0.0222(3) Uani 1 1 d . . . . .
 N3 N 0.03003(18) 0.71319(11) 0.35875(11) 0.0430(4) Uani 1 1 d . . . . .
 N4 N 0.3792(2) 0.78926(10) 0.26970(11) 0.0498(5) Uani 1 1 d . . . . .
 O2B O 0.235(6) 0.6396(17) 0.258(4) 0.0316(5) Uani 0.0522(17) 1 d . . P A 2
 O3B O 0.248(10) 0.525(4) 0.203(5) 0.0434(7) Uani 0.0522(17) 1 d . . P A 2
 O1A O 0.3931(2) 0.53902(12) 0.31441(14) 0.0447(5) Uani 0.9478(17) 1 d . . P A
 1
 F3A F 0.03573(13) 0.54977(8) 0.28639(11) 0.0546(4) Uani 0.9478(17) 1 d . . P
 A 1
 F2 F 0.15425(14) 0.46497(7) 0.32714(9) 0.0513(4) Uani 1 1 d . . . . .
 F1 F 0.16440(16) 0.55765(8) 0.39356(8) 0.0555(4) Uani 1 1 d . . . . .
 S1A S 0.27887(5) 0.56319(2) 0.26809(3) 0.02678(14) Uani 0.9478(17) 1 d . . P
 A 1
 P1 P 0.30968(4) 0.70771(2) 0.39893(2) 0.02219(11) Uani 1 1 d . . . . .
 Cl1 Cl 0.69388(10) 0.83284(5) 0.66626(5) 0.0838(3) Uani 1 1 d . . . . .
 Cl2 Cl 0.65631(13) 0.85460(4) 0.82751(6) 0.0951(3) Uani 1 1 d . . . . .
 S1B S 0.1733(10) 0.5754(5) 0.2385(6) 0.038(3) Uani 0.0522(17) 1 d . . P A 2
 O1B O 0.0362(17) 0.572(2) 0.237(3) 0.0546(4) Uani 0.0522(17) 1 d . . P A 2
 F3B F 0.351(3) 0.530(2) 0.342(3) 0.072(12) Uani 0.0522(17) 1 d . . P A 2
 C30B C 0.228(3) 0.5182(13) 0.3511(7) 0.0356(5) Uani 0.0522(17) 1 d . . P A 2
 O2A O 0.2617(2) 0.63627(9) 0.26950(17) 0.0316(5) Uani 0.9478(17) 1 d . . P A
 1
 O3A O 0.2484(5) 0.53432(16) 0.1906(2) 0.0434(7) Uani 0.9478(17) 1 d . . P A 1

loop_
  _atom_site_aniso_label
  _atom_site_aniso_U_11
  _atom_site_aniso_U_22
  _atom_site_aniso_U_33
  _atom_site_aniso_U_23
  _atom_site_aniso_U_13
  _atom_site_aniso_U_12
 C1 0.0211(7) 0.0246(8) 0.0167(7) 0.0002(6) 0.0044(6) -0.0012(6)
 C2 0.0415(10) 0.0327(9) 0.0165(8) -0.0023(7) 0.0061(7) -0.0022(8)
 C3 0.0438(11) 0.0292(9) 0.0179(8) -0.0049(7) 0.0058(7) -0.0024(8)
 C28 0.0306(9) 0.0304(9) 0.0239(8) -0.0054(7) 0.0030(7) -0.0043(7)
 C29 0.0415(10) 0.0298(9) 0.0205(8) -0.0067(7) 0.0090(7) -0.0092(8)
 C4 0.0290(9) 0.0272(8) 0.0167(7) 0.0031(6) 0.0048(6) -0.0042(7)
 C5 0.0284(9) 0.0405(10) 0.0230(8) 0.0056(7) 0.0058(7) -0.0041(8)
 C6 0.0323(10) 0.0474(12) 0.0377(11) 0.0099(9) 0.0083(8) -0.0124(9)
 C7 0.0478(12) 0.0318(10) 0.0398(11) 0.0081(8) 0.0092(9) -0.0111(9)
 C8 0.0413(11) 0.0300(10) 0.0328(10) 0.0045(8) 0.0084(8) -0.0003(8)
 C9 0.0304(9) 0.0302(9) 0.0206(8) 0.0014(6) 0.0057(7) -0.0026(7)
 C10 0.0299(10) 0.0534(13) 0.0370(11) 0.0160(9) 0.0098(8) 0.0035(9)
 C11 0.0291(11) 0.088(2) 0.0610(16) 0.0246(15) 0.0033(11) -0.0030(12)
 C12 0.0520(15) 0.0702(18) 0.0516(15) 0.0062(13) 0.0210(12) 0.0180(13)
 C13 0.0288(9) 0.0318(9) 0.0325(9) 0.0035(7) 0.0080(7) 0.0004(7)
 C15 0.0318(10) 0.0525(13) 0.0394(11) -0.0095(10) 0.0047(8) -0.0002(9)
 C14 0.0355(11) 0.0560(14) 0.0359(11) -0.0072(10) 0.0112(9) 0.0013(9)
 C16 0.0287(8) 0.0194(7) 0.0160(7) -0.0002(6) 0.0047(6) 0.0003(6)
 C17 0.0298(9) 0.0252(8) 0.0225(8) -0.0037(6) 0.0029(7) 0.0038(7)
 C18 0.0422(11) 0.0330(10) 0.0267(9) 0.0043(7) -0.0003(8) 0.0097(8)
 C19 0.0538(12) 0.0313(10) 0.0264(9) 0.0077(7) 0.0094(8) 0.0015(9)
 C20 0.0388(10) 0.0281(9) 0.0294(9) 0.0012(7) 0.0133(8) -0.0041(7)
 C21 0.0279(8) 0.0219(8) 0.0240(8) -0.0019(6) 0.0055(6) -0.0002(6)
 C22 0.0271(9) 0.0306(9) 0.0418(11) -0.0068(8) 0.0037(8) 0.0028(7)
 C23 0.0450(14) 0.0671(18) 0.0679(18) 0.0114(14) -0.0212(13) -0.0085(13)
 C24 0.0455(15) 0.0710(19) 0.117(3) -0.0513(19) 0.0440(17) -0.0129(13)
 C25 0.0267(9) 0.0308(9) 0.0385(10) 0.0033(8) 0.0025(8) -0.0020(7)
 C27 0.0388(11) 0.0454(13) 0.0474(13) -0.0060(10) -0.0036(9) -0.0067(9)
 C26 0.0437(14) 0.0670(18) 0.084(2) -0.0284(16) -0.0045(13) 0.0232(13)
 C30A 0.0395(12) 0.0296(10) 0.0391(11) -0.0031(8) 0.0098(9) -0.0068(8)
 C32 0.084(2) 0.093(2) 0.0469(15) -0.0049(15) -0.0131(15) 0.0438(19)
 N1 0.0265(7) 0.0267(7) 0.0162(6) 0.0014(5) 0.0050(5) -0.0016(6)
 N2 0.0263(7) 0.0235(7) 0.0174(6) -0.0010(5) 0.0048(5) -0.0015(5)
 N3 0.0335(10) 0.0512(11) 0.0430(10) -0.0093(8) 0.0008(8) -0.0048(8)
 N4 0.0856(16) 0.0402(10) 0.0280(9) -0.0094(7) 0.0242(9) -0.0236(10)
 O2B 0.0452(15) 0.0252(7) 0.0252(12) -0.0016(6) 0.0070(9) -0.0027(7)
 O3B 0.0603(10) 0.0383(13) 0.0337(17) -0.0127(10) 0.0136(12) 0.0002(11)
 O1A 0.0321(10) 0.0438(10) 0.0567(14) 0.0117(9) 0.0006(8) -0.0009(8)
 F3A 0.0315(7) 0.0538(9) 0.0793(12) -0.0049(8) 0.0107(7) -0.0019(6)
 F2 0.0558(8) 0.0314(7) 0.0686(9) 0.0023(6) 0.0152(7) -0.0126(6)
 F1 0.0812(11) 0.0516(8) 0.0392(7) -0.0048(6) 0.0274(7) -0.0171(7)
 S1A 0.0302(3) 0.0245(2) 0.0262(2) -0.00156(17) 0.00589(18) -0.00134(17)
 P1 0.0265(2) 0.0233(2) 0.0173(2) -0.00156(15) 0.00475(15) -0.00188(16)
 Cl1 0.1034(7) 0.0887(6) 0.0560(4) 0.0164(4) -0.0014(4) 0.0226(5)
 Cl2 0.1526(10) 0.0541(4) 0.0905(6) 0.0019(4) 0.0603(7) 0.0148(5)
 S1B 0.042(6) 0.037(5) 0.036(5) 0.005(4) 0.006(4) -0.003(4)
 O1B 0.0315(7) 0.0538(9) 0.0793(12) -0.0049(8) 0.0107(7) -0.0019(6)
 F3B 0.04(2) 0.09(3) 0.07(3) 0.03(2) -0.018(18) 0.01(2)
 C30B 0.0395(12) 0.0296(10) 0.0391(11) -0.0031(8) 0.0098(9) -0.0068(8)
 O2A 0.0452(15) 0.0252(7) 0.0252(12) -0.0016(6) 0.0070(9) -0.0027(7)
 O3A 0.0603(10) 0.0383(13) 0.0337(17) -0.0127(10) 0.0136(12) 0.0002(11)

_geom_special_details
;
 All esds (except the esd in the dihedral angle between two l.s. planes)
 are estimated using the full covariance matrix.  The cell esds are taken
 into account individually in the estimation of esds in distances, angles
 and torsion angles; correlations between esds in cell parameters are only
 used when they are defined by crystal symmetry.  An approximate (isotropic)
 treatment of cell esds is used for estimating esds involving l.s. planes.
;
loop_
  _geom_bond_atom_site_label_1
  _geom_bond_atom_site_label_2
  _geom_bond_distance
  _geom_bond_site_symmetry_2
  _geom_bond_publ_flag
 C1 N1 1.350(2) . ?
 C1 N2 1.344(2) . ?
 C1 P1 1.8512(17) . ?
 C2 C3 1.353(3) . ?
 C2 N1 1.376(2) . ?
 C3 N2 1.379(2) . ?
 C28 N3 1.139(3) . ?
 C28 P1 1.7939(19) . ?
 C29 N4 1.137(3) . ?
 C29 P1 1.7911(19) . ?
 C4 C5 1.405(3) . ?
 C4 C9 1.397(3) . ?
 C4 N1 1.457(2) . ?
 C5 C6 1.394(3) . ?
 C5 C10 1.521(3) . ?
 C6 C7 1.384(3) . ?
 C7 C8 1.377(3) . ?
 C8 C9 1.396(3) . ?
 C9 C13 1.517(3) . ?
 C10 C11 1.524(3) . ?
 C10 C12 1.541(3) . ?
 C13 C15 1.533(3) . ?
 C13 C14 1.532(3) . ?
 C16 C17 1.402(2) . ?
 C16 C21 1.391(2) . ?
 C16 N2 1.456(2) . ?
 C17 C18 1.393(3) . ?
 C17 C22 1.516(3) . ?
 C18 C19 1.380(3) . ?
 C19 C20 1.380(3) . ?
 C20 C21 1.398(2) . ?
 C21 C25 1.517(3) . ?
 C22 C23 1.526(3) . ?
 C22 C24 1.522(3) . ?
 C25 C27 1.525(3) . ?
 C25 C26 1.536(3) . ?
 C30A F3A 1.325(3) . ?
 C30A F2 1.336(2) . ?
 C30A F1 1.333(3) . ?
 C30A S1A 1.826(2) . ?
 C32 Cl1 1.726(3) . ?
 C32 Cl2 1.735(3) . ?
 O2B S1B 1.442(16) . ?
 O3B S1B 1.443(16) . ?
 O1A S1A 1.432(2) . ?
 F2 C30B 1.340(15) . ?
 F1 C30B 1.31(3) . ?
 S1A O2A 1.4521(19) . ?
 S1A O3A 1.448(4) . ?
 S1B O1B 1.439(15) . ?
 S1B C30B 2.25(2) . ?
 F3B C30B 1.345(16) . ?

loop_
  _geom_angle_atom_site_label_1
  _geom_angle_atom_site_label_2
  _geom_angle_atom_site_label_3
  _geom_angle
  _geom_angle_site_symmetry_1
  _geom_angle_site_symmetry_3
  _geom_angle_publ_flag
 N1 C1 P1 117.61(12) . . ?
 N2 C1 N1 107.08(14) . . ?
 N2 C1 P1 135.12(12) . . ?
 C3 C2 N1 106.94(15) . . ?
 C2 C3 N2 107.44(16) . . ?
 N3 C28 P1 176.0(2) . . ?
 N4 C29 P1 171.21(19) . . ?
 C5 C4 N1 117.20(16) . . ?
 C9 C4 C5 124.28(17) . . ?
 C9 C4 N1 118.52(15) . . ?
 C4 C5 C10 122.70(18) . . ?
 C6 C5 C4 115.81(18) . . ?
 C6 C5 C10 121.47(18) . . ?
 C7 C6 C5 121.56(19) . . ?
 C8 C7 C6 120.75(19) . . ?
 C7 C8 C9 120.85(19) . . ?
 C4 C9 C13 123.42(16) . . ?
 C8 C9 C4 116.76(17) . . ?
 C8 C9 C13 119.81(17) . . ?
 C5 C10 C11 112.4(2) . . ?
 C5 C10 C12 111.29(18) . . ?
 C11 C10 C12 109.6(2) . . ?
 C9 C13 C15 110.34(16) . . ?
 C9 C13 C14 111.45(17) . . ?
 C14 C13 C15 110.36(17) . . ?
 C17 C16 N2 117.71(15) . . ?
 C21 C16 C17 124.18(16) . . ?
 C21 C16 N2 118.10(15) . . ?
 C16 C17 C22 122.29(16) . . ?
 C18 C17 C16 116.27(17) . . ?
 C18 C17 C22 121.43(17) . . ?
 C19 C18 C17 121.21(18) . . ?
 C20 C19 C18 120.82(18) . . ?
 C19 C20 C21 120.78(18) . . ?
 C16 C21 C20 116.74(16) . . ?
 C16 C21 C25 123.73(16) . . ?
 C20 C21 C25 119.52(17) . . ?
 C17 C22 C23 112.4(2) . . ?
 C17 C22 C24 110.53(17) . . ?
 C24 C22 C23 111.0(2) . . ?
 C21 C25 C27 110.96(17) . . ?
 C21 C25 C26 110.58(18) . . ?
 C27 C25 C26 110.0(2) . . ?
 F3A C30A F2 107.54(18) . . ?
 F3A C30A F1 107.55(19) . . ?
 F3A C30A S1A 112.30(16) . . ?
 F2 C30A S1A 110.96(15) . . ?
 F1 C30A F2 107.41(18) . . ?
 F1 C30A S1A 110.86(15) . . ?
 Cl1 C32 Cl2 113.40(17) . . ?
 C1 N1 C2 109.41(14) . . ?
 C1 N1 C4 124.21(14) . . ?
 C2 N1 C4 126.24(14) . . ?
 C1 N2 C3 109.13(14) . . ?
 C1 N2 C16 127.73(14) . . ?
 C3 N2 C16 123.13(14) . . ?
 O1A S1A C30A 103.20(11) . . ?
 O1A S1A O2A 114.67(12) . . ?
 O1A S1A O3A 116.66(17) . . ?
 O2A S1A C30A 102.63(15) . . ?
 O3A S1A C30A 104.3(2) . . ?
 O3A S1A O2A 113.13(15) . . ?
 C28 P1 C1 96.28(8) . . ?
 C29 P1 C1 98.76(8) . . ?
 C29 P1 C28 96.15(9) . . ?
 O2B S1B O3B 117(6) . . ?
 O2B S1B C30B 100(3) . . ?
 O3B S1B C30B 86(3) . . ?
 O1B S1B O2B 118(3) . . ?
 O1B S1B O3B 124(5) . . ?
 O1B S1B C30B 98(2) . . ?
 F2 C30B S1B 93.1(10) . . ?
 F2 C30B F3B 129(3) . . ?
 F1 C30B F2 108.3(18) . . ?
 F1 C30B S1B 95.3(17) . . ?
 F1 C30B F3B 122(3) . . ?
 F3B C30B S1B 87.0(17) . . ?

loop_
  _geom_torsion_atom_site_label_1
  _geom_torsion_atom_site_label_2
  _geom_torsion_atom_site_label_3
  _geom_torsion_atom_site_label_4
  _geom_torsion
  _geom_torsion_site_symmetry_1
  _geom_torsion_site_symmetry_2
  _geom_torsion_site_symmetry_3
  _geom_torsion_site_symmetry_4
  _geom_torsion_publ_flag
 C2 C3 N2 C1 -0.2(2) . . . . ?
 C2 C3 N2 C16 178.75(16) . . . . ?
 C3 C2 N1 C1 -0.1(2) . . . . ?
 C3 C2 N1 C4 -175.90(17) . . . . ?
 C4 C5 C6 C7 0.0(3) . . . . ?
 C4 C5 C10 C11 146.5(2) . . . . ?
 C4 C5 C10 C12 -90.1(2) . . . . ?
 C4 C9 C13 C15 106.6(2) . . . . ?
 C4 C9 C13 C14 -130.46(19) . . . . ?
 C5 C4 C9 C8 -0.2(3) . . . . ?
 C5 C4 C9 C13 -179.18(17) . . . . ?
 C5 C4 N1 C1 -94.7(2) . . . . ?
 C5 C4 N1 C2 80.5(2) . . . . ?
 C5 C6 C7 C8 0.0(3) . . . . ?
 C6 C5 C10 C11 -35.3(3) . . . . ?
 C6 C5 C10 C12 88.1(3) . . . . ?
 C6 C7 C8 C9 -0.1(3) . . . . ?
 C7 C8 C9 C4 0.2(3) . . . . ?
 C7 C8 C9 C13 179.22(19) . . . . ?
 C8 C9 C13 C15 -72.3(2) . . . . ?
 C8 C9 C13 C14 50.6(2) . . . . ?
 C9 C4 C5 C6 0.1(3) . . . . ?
 C9 C4 C5 C10 178.45(18) . . . . ?
 C9 C4 N1 C1 86.1(2) . . . . ?
 C9 C4 N1 C2 -98.7(2) . . . . ?
 C10 C5 C6 C7 -178.4(2) . . . . ?
 C16 C17 C18 C19 0.4(3) . . . . ?
 C16 C17 C22 C23 -143.8(2) . . . . ?
 C16 C17 C22 C24 91.6(3) . . . . ?
 C16 C21 C25 C27 -122.6(2) . . . . ?
 C16 C21 C25 C26 115.1(2) . . . . ?
 C17 C16 C21 C20 -0.7(3) . . . . ?
 C17 C16 C21 C25 -179.30(17) . . . . ?
 C17 C16 N2 C1 81.2(2) . . . . ?
 C17 C16 N2 C3 -97.5(2) . . . . ?
 C17 C18 C19 C20 -0.2(3) . . . . ?
 C18 C17 C22 C23 36.7(3) . . . . ?
 C18 C17 C22 C24 -87.9(3) . . . . ?
 C18 C19 C20 C21 -0.4(3) . . . . ?
 C19 C20 C21 C16 0.8(3) . . . . ?
 C19 C20 C21 C25 179.51(18) . . . . ?
 C20 C21 C25 C27 58.8(2) . . . . ?
 C20 C21 C25 C26 -63.5(3) . . . . ?
 C21 C16 C17 C18 0.1(3) . . . . ?
 C21 C16 C17 C22 -179.46(16) . . . . ?
 C21 C16 N2 C1 -100.1(2) . . . . ?
 C21 C16 N2 C3 81.2(2) . . . . ?
 C22 C17 C18 C19 179.93(18) . . . . ?
 C30A F2 C30B F1 59(2) . . . . ?
 C30A F2 C30B S1B -37.2(4) . . . . ?
 C30A F2 C30B F3B -126(3) . . . . ?
 C30A F1 C30B F2 -58.7(13) . . . . ?
 C30A F1 C30B S1B 36.3(6) . . . . ?
 C30A F1 C30B F3B 126(3) . . . . ?
 N1 C1 N2 C3 0.08(19) . . . . ?
 N1 C1 N2 C16 -178.77(15) . . . . ?
 N1 C1 P1 C28 91.85(14) . . . . ?
 N1 C1 P1 C29 -170.91(14) . . . . ?
 N1 C2 C3 N2 0.2(2) . . . . ?
 N1 C4 C5 C6 -179.08(16) . . . . ?
 N1 C4 C5 C10 -0.7(3) . . . . ?
 N1 C4 C9 C8 178.94(16) . . . . ?
 N1 C4 C9 C13 0.0(2) . . . . ?
 N2 C1 N1 C2 0.03(19) . . . . ?
 N2 C1 N1 C4 175.91(15) . . . . ?
 N2 C1 P1 C28 -93.77(18) . . . . ?
 N2 C1 P1 C29 3.47(19) . . . . ?
 N2 C16 C17 C18 178.67(15) . . . . ?
 N2 C16 C17 C22 -0.9(2) . . . . ?
 N2 C16 C21 C20 -179.26(15) . . . . ?
 N2 C16 C21 C25 2.1(2) . . . . ?
 F3A C30A F2 C30B -173.1(12) . . . . ?
 F3A C30A F1 C30B 174.1(7) . . . . ?
 F3A C30A S1A O1A -179.57(17) . . . . ?
 F3A C30A S1A O2A 60.97(17) . . . . ?
 F3A C30A S1A O3A -57.22(19) . . . . ?
 F2 C30A F1 C30B 58.6(7) . . . . ?
 F2 C30A S1A O1A -59.18(19) . . . . ?
 F2 C30A S1A O2A -178.64(16) . . . . ?
 F2 C30A S1A O3A 63.2(2) . . . . ?
 F1 C30A F2 C30B -57.6(12) . . . . ?
 F1 C30A S1A O1A 60.1(2) . . . . ?
 F1 C30A S1A O2A -59.38(18) . . . . ?
 F1 C30A S1A O3A -177.56(17) . . . . ?
 S1A C30A F2 C30B 63.7(12) . . . . ?
 S1A C30A F1 C30B -62.8(7) . . . . ?
 P1 C1 N1 C2 175.89(13) . . . . ?
 P1 C1 N1 C4 -8.2(2) . . . . ?
 P1 C1 N2 C3 -174.72(15) . . . . ?
 P1 C1 N2 C16 6.4(3) . . . . ?

_iucr_refine_instructions_details
;
TITL jjw0274 in P2(1)/c
CELL 0.71073 10.5148 19.7085 17.2472 90 97.743 90
ZERR 4 0.0007 0.0012 0.0011 0 0.001 0
LATT 1
SYMM -X,0.5+Y,0.5-Z
 
SFAC C H Cl F N O P S
UNIT 124 152 8 12 16 12 4 4
SADI F1 C30A F3A C30A F2 C30B F2 C30A F3B C30B
SADI 0.005 S1A C30A S1A C30B
SADI S1A O1A S1A O2A S1A O3A S1B O1B S1B O2B S1B O3B
EADP C30B C30A
EADP O2B O2A
EADP O3B O3A
EADP F3A O1B
 
L.S. 20
PLAN  15
SIZE 0.06 0.06 0.23
TEMP -120
BOND
MORE -1
CONF
REM /HKL>
fmap 2
acta 52
MERG 2
SHEL 1000 0.76

WGHT    0.064900    3.157900
FVAR       0.31808   0.94779
C1    1    0.321398    0.770473    0.479435    11.00000    0.02112    0.02462 =
         0.01667    0.00022    0.00442   -0.00122
C2    1    0.334212    0.799842    0.604804    11.00000    0.04151    0.03269 =
         0.01651   -0.00235    0.00607   -0.00223
AFIX  43
H2    2    0.334379    0.797188    0.659815    11.00000   -1.20000
AFIX   0
C3    1    0.352756    0.856263    0.563113    11.00000    0.04382    0.02923 =
         0.01795   -0.00493    0.00580   -0.00242
AFIX  43
H3    2    0.368629    0.900694    0.583502    11.00000   -1.20000
AFIX   0
C28   1    0.138944    0.713209    0.373056    11.00000    0.03065    0.03040 =
         0.02390   -0.00536    0.00300   -0.00429
C29   1    0.349665    0.762138    0.322645    11.00000    0.04149    0.02976 =
         0.02048   -0.00668    0.00900   -0.00923
C4    1    0.283306    0.677315    0.570343    11.00000    0.02901    0.02723 =
         0.01673    0.00312    0.00480   -0.00420
C5    1    0.154356    0.663132    0.577316    11.00000    0.02836    0.04046 =
         0.02305    0.00559    0.00576   -0.00415
C6    1    0.127419    0.596209    0.595684    11.00000    0.03226    0.04744 =
         0.03769    0.00992    0.00834   -0.01241
AFIX  43
H6    2    0.041695    0.583901    0.601070    11.00000   -1.20000
AFIX   0
C7    1    0.222621    0.547294    0.606253    11.00000    0.04777    0.03182 =
         0.03985    0.00806    0.00924   -0.01108
AFIX  43
H7    2    0.201315    0.502109    0.618730    11.00000   -1.20000
AFIX   0
C8    1    0.347904    0.563381    0.598886    11.00000    0.04131    0.02999 =
         0.03276    0.00446    0.00836   -0.00029
AFIX  43
H8    2    0.412008    0.529162    0.606459    11.00000   -1.20000
AFIX   0
C9    1    0.381896    0.629339    0.580431    11.00000    0.03039    0.03023 =
         0.02055    0.00141    0.00568   -0.00265
C10   1    0.050234    0.717224    0.567853    11.00000    0.02991    0.05341 =
         0.03696    0.01597    0.00977    0.00354
AFIX  13
H10   2    0.076569    0.753016    0.532123    11.00000   -1.20000
AFIX   0
C11   1   -0.079259    0.689297    0.531242    11.00000    0.02906    0.08829 =
         0.06101    0.02465    0.00333   -0.00296
AFIX 137
H11A  2   -0.069079    0.665433    0.482609    11.00000   -1.50000
H11B  2   -0.140088    0.726803    0.519807    11.00000   -1.50000
H11C  2   -0.111856    0.657702    0.567774    11.00000   -1.50000
AFIX   0
C12   1    0.036109    0.751173    0.646756    11.00000    0.05200    0.07023 =
         0.05164    0.00619    0.02098    0.01798
AFIX 137
H12A  2    0.003578    0.717957    0.681524    11.00000   -1.50000
H12B  2   -0.024156    0.789206    0.638011    11.00000   -1.50000
H12C  2    0.119927    0.767939    0.670897    11.00000   -1.50000
AFIX   0
C13   1    0.520889    0.645946    0.573669    11.00000    0.02875    0.03184 =
         0.03248    0.00350    0.00802    0.00038
AFIX  13
H13   2    0.524078    0.692344    0.550546    11.00000   -1.20000
AFIX   0
C15   1    0.600878    0.646636    0.654804    11.00000    0.03183    0.05253 =
         0.03938   -0.00953    0.00465   -0.00015
AFIX 137
H15A  2    0.563377    0.678868    0.688585    11.00000   -1.50000
H15B  2    0.689045    0.660340    0.649935    11.00000   -1.50000
H15C  2    0.601363    0.601140    0.677774    11.00000   -1.50000
AFIX   0
C14   1    0.577746    0.595735    0.519862    11.00000    0.03555    0.05602 =
         0.03593   -0.00722    0.01120    0.00129
AFIX 137
H14A  2    0.581566    0.550450    0.543532    11.00000   -1.50000
H14B  2    0.664481    0.610314    0.512643    11.00000   -1.50000
H14C  2    0.523560    0.594323    0.468995    11.00000   -1.50000
AFIX   0
C16   1    0.356904    0.885370    0.422780    11.00000    0.02873    0.01941 =
         0.01605   -0.00020    0.00470    0.00031
C17   1    0.243826    0.910670    0.380197    11.00000    0.02983    0.02517 =
         0.02252   -0.00375    0.00286    0.00380
C18   1    0.259121    0.957498    0.321660    11.00000    0.04217    0.03295 =
         0.02672    0.00426   -0.00027    0.00970
AFIX  43
H18   2    0.185319    0.976300    0.291419    11.00000   -1.20000
AFIX   0
C19   1    0.379513    0.977077    0.306792    11.00000    0.05376    0.03134 =
         0.02643    0.00772    0.00944    0.00153
AFIX  43
H19   2    0.387375    1.008974    0.266415    11.00000   -1.20000
AFIX   0
C20   1    0.488587    0.950900    0.349840    11.00000    0.03884    0.02812 =
         0.02942    0.00120    0.01332   -0.00405
AFIX  43
H20   2    0.570643    0.964763    0.338528    11.00000   -1.20000
AFIX   0
C21   1    0.479794    0.904225    0.409897    11.00000    0.02795    0.02187 =
         0.02403   -0.00185    0.00553   -0.00016
C22   1    0.111829    0.889046    0.396835    11.00000    0.02711    0.03058 =
         0.04183   -0.00680    0.00373    0.00280
AFIX  13
H22   2    0.120411    0.842970    0.421259    11.00000   -1.20000
AFIX   0
C23   1    0.015742    0.883599    0.322492    11.00000    0.04501    0.06709 =
         0.06785    0.01139   -0.02123   -0.00853
AFIX 137
H23A  2   -0.007269    0.929183    0.302654    11.00000   -1.50000
H23B  2   -0.061526    0.860069    0.334226    11.00000   -1.50000
H23C  2    0.054296    0.858046    0.282839    11.00000   -1.50000
AFIX   0
C24   1    0.063068    0.936892    0.455486    11.00000    0.04551    0.07099 =
         0.11714   -0.05125    0.04395   -0.01286
AFIX 137
H24A  2    0.123963    0.937557    0.503787    11.00000   -1.50000
H24B  2   -0.020779    0.921211    0.467090    11.00000   -1.50000
H24C  2    0.054614    0.982726    0.433356    11.00000   -1.50000
AFIX   0
C25   1    0.601492    0.875946    0.455723    11.00000    0.02674    0.03082 =
         0.03851    0.00332    0.00249   -0.00204
AFIX  13
H25   2    0.576951    0.845102    0.497293    11.00000   -1.20000
AFIX   0
C27   1    0.685111    0.932726    0.495084    11.00000    0.03879    0.04537 =
         0.04739   -0.00601   -0.00360   -0.00674
AFIX 137
H27A  2    0.712644    0.962532    0.455015    11.00000   -1.50000
H27B  2    0.760692    0.913107    0.526617    11.00000   -1.50000
H27C  2    0.635736    0.959029    0.528917    11.00000   -1.50000
AFIX   0
C26   1    0.677517    0.834649    0.402000    11.00000    0.04373    0.06698 =
         0.08391   -0.02841   -0.00450    0.02323
AFIX 137
H26A  2    0.625216    0.796422    0.379752    11.00000   -1.50000
H26B  2    0.756447    0.817451    0.432335    11.00000   -1.50000
H26C  2    0.699391    0.863727    0.359639    11.00000   -1.50000
AFIX   0
 
PART 1
C30A  1    0.151265    0.532529    0.321139    21.00000    0.03949    0.02961 =
         0.03908   -0.00313    0.00978   -0.00681
 
PART 0
C32   1    0.741285    0.811895    0.763013    11.00000    0.08399    0.09334 =
         0.04690   -0.00488   -0.01305    0.04380
AFIX  23
H32A  2    0.833748    0.822270    0.776465    11.00000   -1.20000
H32B  2    0.730097    0.762452    0.769648    11.00000   -1.20000
AFIX   0
 
N1    5    0.315062    0.747030    0.552378    11.00000    0.02652    0.02673 =
         0.01620    0.00135    0.00503   -0.00158
N2    5    0.344394    0.837453    0.485566    11.00000    0.02625    0.02352 =
         0.01742   -0.00097    0.00483   -0.00152
N3    5    0.030027    0.713185    0.358750    11.00000    0.03354    0.05125 =
         0.04304   -0.00935    0.00081   -0.00477
N4    5    0.379227    0.789263    0.269698    11.00000    0.08561    0.04019 =
         0.02802   -0.00941    0.02423   -0.02363
PART 2
O2B   6    0.234935    0.639609    0.258423   -21.00000    0.04521    0.02521 =
         0.02517   -0.00161    0.00704   -0.00271
O3B   6    0.248000    0.525327    0.203483   -21.00000    0.06028    0.03827 =
         0.03374   -0.01266    0.01363    0.00025
PART 0
PART 1
O1A   6    0.393132    0.539023    0.314408    21.00000    0.03211    0.04385 =
         0.05668    0.01168    0.00062   -0.00087
F3A   4    0.035728    0.549768    0.286387    21.00000    0.03146    0.05379 =
         0.07934   -0.00488    0.01065   -0.00194
PART 0
F2    4    0.154245    0.464967    0.327143    11.00000    0.05577    0.03140 =
         0.06863    0.00225    0.01524   -0.01261
F1    4    0.164403    0.557654    0.393557    11.00000    0.08121    0.05155 =
         0.03915   -0.00479    0.02741   -0.01714
PART 1
S1A   8    0.278869    0.563193    0.268091    21.00000    0.03016    0.02450 =
         0.02625   -0.00156    0.00589   -0.00134
 
PART 0
P1    7    0.309679    0.707705    0.398935    11.00000    0.02651    0.02328 =
         0.01727   -0.00156    0.00475   -0.00188
 
CL1   3    0.693877    0.832836    0.666261    11.00000    0.10339    0.08866 =
         0.05600    0.01643   -0.00141    0.02256
CL2   3    0.656313    0.854597    0.827514    11.00000    0.15259    0.05415 =
         0.09052    0.00188    0.06032    0.01483
PART 2
S1B   8    0.173306    0.575379    0.238464   -21.00000    0.04218    0.03689 =
         0.03577    0.00453    0.00586   -0.00296
O1B   6    0.036234    0.571806    0.236559   -21.00000    0.03146    0.05379 =
         0.07934   -0.00488    0.01065   -0.00194
F3B   4    0.351348    0.530207    0.341601   -21.00000    0.04472    0.09281 =
         0.07088    0.02937   -0.01835    0.01231
C30B  1    0.228477    0.518225    0.351113   -21.00000    0.03949    0.02961 =
         0.03908   -0.00313    0.00978   -0.00681
PART 0
PART 1
O2A   6    0.261735    0.636271    0.269498    21.00000    0.04521    0.02521 =
         0.02517   -0.00161    0.00704   -0.00271
O3A   6    0.248426    0.534321    0.190632    21.00000    0.06028    0.03827 =
         0.03374   -0.01266    0.01363    0.00025
HKLF 4
 
REM  jjw0274 in P2(1)/c
REM R1 =  0.0497 for    7281 Fo > 4sig(Fo)  and  0.0575 for all    8443 data
REM    445 parameters refined using     26 restraints
 
END  
     
WGHT      0.0649      3.1583 

REM Highest difference peak  0.863,  deepest hole -0.883,  1-sigma level  0.059
Q1    1   0.7566  0.8508  0.6955  11.00000  0.05    0.86
Q2    1   0.6191  0.8355  0.6855  11.00000  0.05    0.84
Q3    1   0.7217  0.8698  0.8242  11.00000  0.05    0.67
Q4    1   0.6058  0.8535  0.7912  11.00000  0.05    0.56
Q5    1   0.2139  0.5441  0.3020  11.00000  0.05    0.47
Q6    1   0.6559  0.8330  0.8607  11.00000  0.05    0.45
Q7    1   0.2666  0.6037  0.2663  11.00000  0.05    0.41
Q8    1   0.2186  0.7119  0.3848  11.00000  0.05    0.37
Q9    1   0.2974  0.8943  0.4000  11.00000  0.05    0.35
Q10   1   0.2166  0.6714  0.5771  11.00000  0.05    0.34
Q11   1   0.3605  0.5593  0.2802  11.00000  0.05    0.34
Q12   1   0.4478  0.6390  0.5764  11.00000  0.05    0.34
Q13   1   0.4828  0.9297  0.3853  11.00000  0.05    0.34
Q14   1   0.3101  0.7450  0.4365  11.00000  0.05    0.33
Q15   1   0.5383  0.8868  0.4297  11.00000  0.05    0.33

REM The information below was added by Olex2.
REM
REM R1 = 0.0497 for 7281 Fo > 4sig(Fo) and 0.0575 for all 42052 data
REM n/a parameters refined using n/a restraints
REM Highest difference peak 0.86, deepest hole -0.88
REM Mean Shift 0, Max Shift 0.001.

REM +++ Tabular Listing of Refinement Information +++
REM R1_all = 0.0575
REM R1_gt = 0.0497
REM wR_ref = 0.1343
REM GOOF = 1.020
REM Shift_max = 0.001
REM Shift_mean = 0
REM Reflections_all = 42052
REM Reflections_gt = 7281
REM Parameters = n/a
REM Hole = -0.88
REM Peak = 0.86
REM Flack = n/a

;
_olex2_submission_special_instructions 'No special instructions were received'
loop_
  _refln_index_h
  _refln_index_k
  _refln_index_l
  _refln_F_squared_meas
  _refln_F_squared_sigma
  _refln_scale_group_code
 1 0 0 1680.85 25.36 3
 1 0 0 1660.54 26.4 1
 -1 0 0 1745.05 25.46 2
 2 0 0 4263.47 63.5 1
 2 0 0 4354.09 62.07 3
 3 0 0 9742.41 137.21 3
 3 0 0 9274.38 139.77 1
 -3 0 0 9999.12 139.57 2
 4 0 0 394.35 6.25 1
 -4 0 0 401.08 6.51 2
 4 0 0 399.12 6.23 3
 5 0 0 709.19 10.75 3
 -5 0 0 701.5 11.15 2
 5 0 0 728.59 10.87 1
 -6 0 0 575.99 9.53 2
 6 0 0 575.41 9.08 3
 6 0 0 580.07 9.1 1
 7 0 0 89.73 2.22 1
 7 0 0 89.52 2.31 3
 -7 0 0 86.33 2.55 2
 -8 0 0 9.23 1.05 2
 8 0 0 9.14 0.88 3
 8 0 0 8.34 0.86 1
 -9 0 0 126.45 3.62 2
 9 0 0 127.86 3.03 1
 9 0 0 128.98 3.27 3
 10 0 0 5.37 0.93 3
 -10 0 0 5.03 1.02 2
 11 0 0 81.09 2.79 3
 12 0 0 1.17 0.85 3
 -12 0 0 1.78 0.96 2
 -13 0 0 1.92 1.11 2
 -14 0 0 5.32 1.37 2
 0 -1 0 -0.06 0.04 1
 0 1 0 -0.18 0.05 2
 0 1 0 -0.06 0.05 3
 1 1 0 4112.82 62.86 3
 1 -1 0 4428.09 65.47 3
 1 -1 0 4221.14 64.66 1
 -1 1 0 4463.95 64.28 2
 -1 -1 0 4595.04 64.34 2
 -2 -1 0 35.77 0.92 2
 2 1 0 35.86 0.87 3
 2 1 0 37.39 0.74 1
 2 -1 0 36.89 0.89 1
 2 -1 0 36.43 0.8 3
 -2 1 0 36.13 0.92 2
 3 1 0 12.6 0.53 1
 -3 -1 0 10.89 0.64 2
 3 -1 0 11.76 0.55 3
 3 1 0 11.37 0.58 3
 3 -1 0 12.11 0.65 1
 -3 1 0 11.12 0.63 2
 -4 -1 0 1222.99 18.07 2
 -4 1 0 1218.8 18.07 2
 4 1 0 1241.28 17.88 1
 4 1 0 1229.04 17.71 3
 4 -1 0 1203.29 17.62 3
 4 -1 0 1237.14 18.04 1
 5 -1 0 91.38 2.03 3
 5 1 0 91.93 2.1 3
 5 -1 0 89.56 2.08 1
 -5 1 0 95.08 2.31 2
 -5 -1 0 92.36 2.3 2
 5 1 0 91.38 1.93 1
 6 1 0 7.21 0.62 1
 6 1 0 6.81 0.64 3
 6 -1 0 8.72 0.73 1
 -6 -1 0 6.94 0.76 2
 6 -1 0 7.48 0.66 3
 -6 1 0 7.5 0.78 2
 7 1 0 159.94 3.17 1
 -7 1 0 159.8 3.73 2
 -7 -1 0 159.59 3.74 2
 7 1 0 158.23 3.4 3
 7 -1 0 157.47 3.34 1
 7 -1 0 161.04 3.36 3
 8 -1 0 26.39 1.36 3
 -8 -1 0 28.1 1.58 2
 8 -1 0 26.19 1.32 1
 8 1 0 25.42 1.22 1
 -8 1 0 24.49 1.51 2
 8 1 0 24.83 1.39 3
 9 1 0 101.93 2.57 1
 -9 -1 0 110.01 3.35 2
 9 -1 0 109.77 2.92 3
 9 -1 0 103.71 2.74 1
 -9 1 0 106.09 3.28 2
 9 1 0 105.82 2.95 3
 10 -1 0 31.75 1.64 3
 -10 -1 0 30.11 1.85 2
 -10 1 0 28.62 1.82 2
 10 1 0 29.98 1.66 3
 11 1 0 2.88 0.9 3
 -11 1 0 1.97 0.97 2
 11 -1 0 3.89 0.94 3
 -11 -1 0 2.21 0.98 2
 -12 -1 0 -0.05 0.81 2
 12 1 0 0.42 0.85 3
 -12 1 0 0.7 0.86 2
 -13 1 0 3.99 1.19 2
 -13 -1 0 2.43 1.19 2
 -14 -1 0 -0.77 0.97 2
 -14 1 0 -0.03 0.98 2
 0 -2 0 79.23 1.39 1
 0 2 0 79.68 1.39 2
 0 2 0 83.4 1.37 3
 1 2 0 48.7 0.98 3
 1 -2 0 51.89 1.05 1
 -1 2 0 51.05 1.01 2
 -1 -2 0 49.89 0.97 1
 -1 2 0 49.41 0.91 3
 -2 2 0 -0.06 0.2 2
 2 -2 0 -0.09 0.18 3
 -2 -2 0 0.26 0.21 2
 2 -2 0 0.28 0.22 1
 2 2 0 0.48 0.23 3
 -3 -2 0 3800.2 53.3 2
 3 -2 0 3698.72 54.96 1
 3 2 0 3619.21 51.71 3
 3 2 0 3515.98 53.99 1
 -3 2 0 3795.61 53.5 2
 3 -2 0 3649.41 52.29 3
 4 -2 0 164.92 2.92 3
 -4 -2 0 163.65 3.2 2
 4 2 0 164.38 3.05 3
 4 -2 0 164.38 3.12 1
 -4 2 0 164 3.23 2
 4 2 0 165.2 2.77 1
 5 -2 0 681.57 10.32 3
 5 -2 0 695.46 10.67 1
 -5 -2 0 682.41 10.8 2
 5 2 0 688.93 10.48 3
 5 2 0 680.86 10.27 1
 -5 2 0 683.02 10.8 2
 6 -2 0 374.1 6.34 1
 6 2 0 370.05 5.92 1
 6 -2 0 366.66 6.1 3
 -6 2 0 368.19 6.57 2
 6 2 0 365.76 6.26 3
 -6 -2 0 360.72 6.54 2
 -7 -2 0 14.59 1.13 2
 7 2 0 14.57 0.84 1
 7 2 0 14.67 0.99 3
 7 -2 0 15.37 0.97 3
 7 -2 0 13.77 1.06 1
 -7 2 0 14.97 1.14 2
 8 2 0 301.16 5.7 3
 8 -2 0 296.34 5.53 3
 -8 2 0 312.69 6.19 2
 -8 -2 0 297.26 6.09 2
 8 -2 0 294.67 5.62 1
 8 2 0 298.44 5.18 1
 -9 -2 0 142.42 3.94 2
 9 -2 0 144.63 3.46 1
 9 2 0 150.78 3.66 3
 9 -2 0 148.8 3.5 3
 -9 2 0 143.66 3.92 2
 10 -2 0 18.03 1.35 1
 -10 -2 0 14.01 1.39 2
 -10 2 0 14.62 1.4 2
 10 -2 0 17.08 1.36 3
 10 2 0 16.51 1.33 3
 -11 2 0 52.93 2.6 2
 11 -2 0 53.55 2.2 3
 -11 -2 0 48.45 2.52 2
 11 2 0 53.7 2.31 3
 12 2 0 0.7 0.88 3
 -12 2 0 0.82 0.89 2
 -12 -2 0 -0.12 0.84 2
 -13 2 0 14.28 1.69 2
 -13 -2 0 12.3 1.71 2
 13 2 0 13.25 1.52 3
 -14 -2 0 5.7 1.45 2
 -14 2 0 5.75 1.48 2
 0 -3 0 0.19 0.13 1
 0 3 0 0.09 0.14 3
 0 3 0 0.09 0.13 2
 1 -3 0 479.75 7.25 1
 -1 3 0 478.39 7.15 2
 -1 3 0 467.86 7.02 3
 -1 -3 0 482.07 7.32 1
 1 3 0 476.86 7.04 3
 -1 -3 0 475.31 7.14 2
 -2 -3 0 1623.08 22.76 2
 -2 3 0 1599.97 22.76 2
 2 3 0 1554.31 22.44 3
 2 -3 0 1592.78 22.53 3
 -2 -3 0 1576.02 27.12 1
 2 -3 0 1544.84 23.41 1
 -3 -3 0 256.81 4.34 2
 3 3 0 248.43 4.19 3
 3 -3 0 253.03 4.34 1
 3 3 0 252.05 3.95 1
 3 -3 0 257.62 4.03 3
 -3 3 0 256.89 4.32 2
 -4 -3 0 236.84 4.33 2
 -4 3 0 238.28 4.32 2
 4 -3 0 241.36 4.32 1
 4 3 0 244.13 3.79 1
 4 -3 0 240.27 3.98 3
 4 3 0 248.9 4.21 3
 5 3 0 404.38 6.73 3
 5 -3 0 416.15 6.9 1
 -5 -3 0 399.22 6.95 2
 -5 3 0 411.76 6.97 2
 5 3 0 424.85 6.33 1
 5 -3 0 412.72 6.52 3
 6 3 0 11.94 0.92 3
 -6 3 0 9.87 0.86 2
 6 3 0 11.26 0.68 1
 6 -3 0 12.94 0.99 1
 -6 -3 0 10.24 0.88 2
 6 -3 0 10.94 0.76 3
 7 -3 0 445.88 7.68 1
 7 -3 0 447.11 7.37 3
 7 3 0 445.9 7.61 3
 -7 -3 0 445.79 7.98 2
 7 3 0 454.07 7.05 1
 -7 3 0 441.76 7.93 2
 -8 -3 0 2.31 0.74 2
 8 -3 0 3.29 0.78 1
 8 -3 0 2.91 0.7 3
 -8 3 0 2.5 0.76 2
 8 3 0 2.61 0.73 3
 9 -3 0 251.92 5.14 1
 9 -3 0 258.55 5.06 3
 9 3 0 249.17 5.24 3
 -9 3 0 244.83 5.56 2
 -9 -3 0 250.32 5.63 2
 10 -3 0 186.58 4.23 3
 -10 3 0 190.89 4.84 2
 -10 -3 0 180.05 4.77 2
 10 -3 0 179.54 4.21 1
 10 3 0 180.35 4.38 3
 -11 -3 0 -1.1 0.66 2
 11 3 0 0.09 0.77 3
 -11 3 0 0.4 0.75 2
 -12 3 0 79.05 3.25 2
 12 3 0 77.89 3 3
 -12 -3 0 65.53 3.07 2
 -13 3 0 6.3 1.41 2
 13 3 0 5.79 1.25 3
 -13 -3 0 3.07 1.13 2
 -14 -3 0 8.51 1.59 2
 -14 3 0 11.57 1.76 2
 0 4 0 505.19 7.51 3
 0 4 0 509.85 7.66 2
 0 -4 0 517.53 7.7 1
 -1 4 0 1373.86 19.88 2
 -1 -4 0 1431.47 20.31 1
 -1 4 0 1385.21 19.66 3
 -1 -4 0 1370.23 19.86 2
 1 -4 0 1362.26 20.52 1
 1 4 0 1353.04 19.61 3
 2 -4 0 1.95 0.42 1
 -2 -4 0 2.81 0.2 1
 -2 -4 0 2.45 0.36 2
 -2 4 0 2.65 0.36 2
 -2 4 0 3.3 0.32 3
 3 4 0 9.32 0.6 3
 -3 4 0 8.83 0.57 2
 3 -4 0 8.31 0.48 3
 3 -4 0 8.29 0.64 1
 -3 -4 0 8.92 0.62 2
 4 -4 0 56.49 1.67 1
 4 -4 0 56.29 1.37 3
 -4 4 0 58.77 1.63 2
 -4 -4 0 57.48 1.64 2
 4 4 0 57.86 1.57 3
 4 4 0 60.66 1.09 1
 5 4 0 6.9 0.44 1
 5 -4 0 7.15 0.57 3
 -5 -4 0 6.8 0.72 2
 5 4 0 7.36 0.66 3
 -5 4 0 6.82 0.67 2
 5 -4 0 6.44 0.73 1
 -6 4 0 40.52 1.58 2
 6 -4 0 43.6 1.67 1
 6 4 0 45.22 1.59 3
 6 -4 0 41.16 1.34 3
 -6 -4 0 41.84 1.62 2
 6 4 0 42.53 1.05 1
 7 4 0 10.89 0.64 1
 7 -4 0 12.16 0.98 1
 -7 4 0 9.98 0.95 2
 -7 -4 0 7.65 0.9 2
 7 4 0 10.57 0.93 3
 7 -4 0 11.13 0.89 3
 -8 4 0 137.02 3.61 2
 8 -4 0 139.83 3.16 3
 -8 -4 0 135.68 3.63 2
 8 -4 0 133.95 3.35 1
 8 4 0 137.5 3.39 3
 9 4 0 3.4 0.83 3
 -9 4 0 0.96 0.76 2
 9 -4 0 2.13 0.71 3
 9 -4 0 2.08 0.81 1
 -9 -4 0 2.43 0.85 2
 10 -4 0 2.23 0.81 3
 10 -4 0 3.15 0.82 1
 10 4 0 4.23 0.94 3
 -10 4 0 2.94 0.93 2
 -10 -4 0 3.42 0.94 2
 11 4 0 44.09 2.18 3
 -11 -4 0 41.3 2.31 2
 11 -4 0 43.05 2.03 1
 -11 4 0 45 2.36 2
 -12 -4 0 0.18 0.99 2
 -12 4 0 1.49 1.05 2
 12 4 0 2.18 0.99 3
 -13 4 0 7.9 1.48 2
 13 4 0 9.72 1.43 3
 -13 -4 0 7.44 1.43 2
 -14 -4 0 1.42 1.14 2
 -14 4 0 1.02 1.15 2
 0 -5 0 -0.26 0.34 1
 0 5 0 -0.47 0.31 2
 1 -5 0 6848.62 105.28 1
 -1 -5 0 7273.2 105.16 1
 -1 5 0 7307.96 102.82 3
 -1 5 0 7316 103.64 2
 1 5 0 7255.09 103.09 3
 1 5 0 7415.85 104.63 2
 -2 -5 0 966.35 14.39 1
 -2 5 0 956.42 14.33 2
 -2 -5 0 991.7 14.38 2
 -2 5 0 966.91 14 3
 2 5 0 977.64 14.18 3
 2 -5 0 985.49 14.59 1
 3 -5 0 23.45 1.03 1
 -3 5 0 21.62 0.9 2
 -3 -5 0 21.4 0.92 2
 -3 5 0 23.53 0.76 3
 3 5 0 22.88 0.91 3
 -4 5 0 828.43 12.69 2
 4 -5 0 819.96 12.17 3
 4 -5 0 835.27 12.87 1
 4 5 0 839.01 12.52 3
 5 -5 0 264.94 4.44 3
 -5 5 0 260.12 4.87 2
 5 5 0 257.06 4.03 1
 -5 -5 0 265.43 4.94 2
 5 5 0 264.08 4.77 3
 5 -5 0 257.97 4.93 1
 6 -5 0 6.51 0.8 1
 -6 -5 0 5.44 0.73 2
 -6 5 0 4.05 0.67 2
 6 5 0 6.34 0.4 1
 6 -5 0 6.4 0.61 3
 6 5 0 5.69 0.68 3
 7 -5 0 76.55 2.03 3
 -7 -5 0 73.05 2.4 2
 -7 5 0 73.69 2.35 2
 7 5 0 75.65 2.27 3
 7 -5 0 72.33 2.34 1
 8 -5 0 71.48 2.36 1
 8 -5 0 70.53 2.09 3
 -8 -5 0 66.62 2.47 2
 -8 5 0 71.45 2.49 2
 8 5 0 71.63 2.32 3
 9 -5 0 0.98 0.76 1
 -9 -5 0 1.76 0.81 2
 9 -5 0 0.38 0.58 3
 -9 5 0 0.85 0.7 2
 9 5 0 2.1 0.73 3
 10 5 0 0.69 0.75 3
 -10 -5 0 0.03 0.8 2
 -10 5 0 -0.6 0.59 2
 10 -5 0 -0.64 0.66 1
 -11 -5 0 37.5 2.21 2
 11 5 0 38.32 2.08 3
 11 -5 0 35.87 1.94 1
 -11 5 0 31.91 2.03 2
 -12 -5 0 33.29 2.24 2
 12 5 0 33.49 2.11 3
 -12 5 0 37.76 2.37 2
 -13 -5 0 6.81 1.43 2
 13 5 0 6.97 1.32 3
 -13 5 0 6.96 1.41 2
 -14 5 0 2.73 1.16 2
 -14 -5 0 4.58 1.45 2
 14 5 0 5.16 1.38 3
 0 -6 0 0.79 0.38 1
 0 6 0 0.41 0.29 2
 -1 -6 0 621.4 9.14 1
 -1 6 0 606.16 8.98 3
 1 6 0 611.78 9.13 3
 1 -6 0 615.63 9.41 1
 1 6 0 618.02 9.29 2
 -1 6 0 599.48 9.25 2
 -2 6 0 435.35 7 2
 -2 6 0 449.11 6.68 3
 -2 -6 0 443.45 7.03 2
 -2 -6 0 449.19 6.66 1
 -3 -6 0 53.25 1.49 2
 3 -6 0 49.59 1.55 1
 -3 6 0 50.29 1.2 3
 -3 6 0 49.04 1.44 2
 3 6 0 48.17 1.41 3
 -3 -6 0 47.6 0.91 1
 -4 -6 0 213.6 4.16 2
 4 -6 0 228.82 4.32 1
 -4 6 0 217.74 4.15 2
 -4 6 0 220.6 3.75 3
 4 6 0 225.4 4.11 3
 5 -6 0 0.06 0.5 1
 5 -6 0 0.18 0.34 3
 -5 -6 0 0.59 0.43 2
 -5 6 0 0.27 0.4 2
 5 6 0 0.95 0.45 3
 6 -6 0 7.9 0.64 3
 6 -6 0 7.81 0.88 1
 -6 -6 0 7.46 0.81 2
 -6 6 0 7.71 0.78 2
 6 6 0 6.43 0.73 3
 -7 6 0 18.22 1.22 2
 -7 -6 0 18.59 1.33 2
 7 6 0 18.59 1.2 3
 7 -6 0 17.46 1.27 1
 7 -6 0 18.9 1.02 3
 -8 -6 0 0.24 0.65 2
 8 6 0 -0.09 0.63 3
 -8 6 0 -0.11 0.55 2
 8 -6 0 -0.58 0.7 1
 8 -6 0 -0.13 0.5 3
 -9 -6 0 -0.03 0.64 2
 -9 6 0 0.9 0.76 2
 9 -6 0 0.4 0.57 3
 9 -6 0 -0.74 0.66 1
 9 6 0 -0.63 0.62 3
 10 6 0 -0.3 0.7 3
 10 -6 0 -0.8 0.68 1
 -10 -6 0 -0.01 0.7 2
 -10 6 0 -0.29 0.7 2
 11 6 0 2.57 0.94 3
 -11 -6 0 3.73 1.03 2
 11 -6 0 2.71 0.93 1
 -11 6 0 2.69 1 2
 12 6 0 4.53 1.06 3
 -12 6 0 4.95 1.23 2
 -12 -6 0 4.11 1.19 2
 -13 6 0 15.75 1.83 2
 -13 -6 0 12.82 1.75 2
 13 6 0 12.11 1.49 3
 -14 6 0 0.55 1 2
 14 6 0 -1.52 0.98 3
 -14 -6 0 0.14 1.05 2
 0 -7 0 0.21 0.31 1
 0 7 0 0.45 0.25 2
 0 7 0 0.71 0.3 3
 1 -7 0 1.29 0.45 1
 -1 7 0 1.84 0.36 2
 1 7 0 1.54 0.34 2
 1 7 0 1.88 0.37 3
 -1 7 0 1.77 0.31 3
 -1 -7 0 1.52 0.33 1
 -2 7 0 23.95 0.77 3
 2 7 0 25.98 1 3
 -2 -7 0 23.87 0.95 2
 -2 -7 0 24.82 0.69 1
 2 -7 0 24.93 1.08 1
 -2 7 0 25.5 0.95 2
 3 -7 0 62.55 1.83 1
 -3 7 0 59.94 1.65 2
 -3 7 0 60.76 1.39 3
 3 7 0 60.39 1.65 3
 -3 -7 0 60.51 1.69 2
 -3 -7 0 62.5 1.15 1
 -4 -7 0 269.94 5 2
 -4 7 0 271.64 4.97 2
 4 -7 0 279.63 5.18 1
 4 7 0 271.94 4.89 3
 -4 7 0 274.27 4.5 3
 5 -7 0 100.33 2.7 1
 -5 7 0 109.53 2.26 3
 -5 7 0 105.3 2.64 2
 -5 -7 0 105.47 2.69 2
 5 7 0 104.54 2.61 3
 -6 7 0 64.89 2.11 2
 6 -7 0 65.45 2.2 1
 -6 7 0 66.38 1.74 3
 6 7 0 66.08 2.1 3
 7 -7 0 39.22 1.8 1
 7 7 0 37.91 1.66 3
 7 -7 0 40.58 1.42 3
 -7 7 0 40.23 1.74 2
 -7 -7 0 37.7 1.81 2
 8 -7 0 109.37 2.69 3
 -8 -7 0 113.94 3.32 2
 8 -7 0 114.58 3.27 1
 8 7 0 111.32 3.1 3
 -8 7 0 111.23 3.21 2
 -9 -7 0 0.2 0.68 2
 9 -7 0 -0.2 0.73 1
 9 7 0 0.67 0.65 3
 -9 7 0 -0.49 0.65 2
 -10 7 0 14.6 1.4 2
 10 7 0 13.35 1.27 3
 -10 -7 0 13.96 1.43 2
 10 -7 0 12.92 1.35 1
 -11 -7 0 0.06 0.73 2
 -11 7 0 0.96 0.89 2
 11 -7 0 3.48 0.93 1
 11 7 0 0.08 0.77 3
 -12 7 0 1.66 0.98 2
 -12 -7 0 -1 0.88 2
 12 -7 0 -0.32 0.85 1
 12 7 0 1.02 0.92 3
 -13 7 0 2.84 1.1 2
 -13 -7 0 1.54 1.05 2
 13 7 0 3.45 1.19 3
 14 7 0 0.1 0.96 3
 -14 -7 0 0.12 1.13 2
 -14 7 0 -1.54 0.84 2
 0 -8 0 1125.58 16.62 1
 0 8 0 1120.95 16.23 3
 0 8 0 1116.52 16.55 2
 1 8 0 152 2.96 2
 -1 -8 0 150.07 2.74 1
 -1 8 0 144.91 2.69 3
 1 8 0 151.26 2.86 3
 1 -8 0 152.48 3.03 1
 -1 8 0 150.62 2.95 2
 2 -8 0 542.41 8.75 1
 -2 -8 0 549.99 8.16 1
 -2 8 0 537.33 8.56 2
 -2 8 0 541.13 8.14 3
 -2 -8 0 536.06 8.57 2
 3 8 0 0.81 0.39 3
 -3 8 0 0.44 0.35 2
 -3 -8 0 0.31 0.18 1
 -3 -8 0 0.98 0.4 2
 -3 8 0 0.02 0.29 3
 3 -8 0 0.57 0.53 1
 4 8 0 329.13 5.7 3
 -4 -8 0 317.49 5.76 2
 4 -8 0 328.94 5.96 1
 -4 8 0 321.72 5.21 3
 -4 8 0 315.75 5.72 2
 5 -8 0 290.44 5.52 1
 -5 8 0 269.46 5.24 2
 5 8 0 276.14 5.21 3
 -5 8 0 282.4 4.73 3
 6 8 0 8.25 0.89 3
 -6 8 0 6.19 0.76 2
 -6 -8 0 7.16 0.88 2
 6 -8 0 6.71 0.93 1
 -6 8 0 9.4 0.71 3
 -7 8 0 77.38 2.05 3
 -7 -8 0 77.91 2.56 2
 7 8 0 78.96 2.45 3
 -7 8 0 77.02 2.49 2
 7 -8 0 76.8 2.58 1
 8 -8 0 79.98 2.69 1
 -8 -8 0 76.17 2.69 2
 -8 8 0 74.23 2.11 3
 -8 8 0 78.72 2.66 2
 8 8 0 80.63 2.63 3
 9 8 0 54.14 2.28 3
 9 -8 0 49.46 2.27 1
 -9 8 0 50.94 2.25 2
 -9 -8 0 48.41 2.28 2
 10 8 0 0.95 0.77 3
 -10 -8 0 1.07 0.77 2
 10 -8 0 0.65 0.83 1
 -10 8 0 0.3 0.7 2
 -11 8 0 0.15 0.85 2
 11 -8 0 -1.21 0.67 1
 -11 -8 0 0.25 0.82 2
 11 8 0 -0.13 0.8 3
 -12 -8 0 -0.29 0.9 2
 12 8 0 0.93 0.88 3
 -12 8 0 -0.18 0.84 2
 12 -8 0 1.51 0.96 1
 -13 -8 0 1.12 0.99 2
 13 8 0 0.11 0.95 3
 -13 8 0 -0.74 0.79 2
 14 8 0 13.47 1.76 3
 -14 8 0 9.46 1.69 2
 -14 -8 0 10.53 1.71 2
 0 9 0 1.15 0.34 3
 0 9 0 2.25 0.41 2
 0 -9 0 0.65 0.38 1
 -1 -9 0 0.42 0.32 1
 -1 9 0 0.27 0.3 2
 -1 9 0 0.72 0.33 3
 1 -9 0 0.16 0.39 1
 1 9 0 0.46 0.35 2
 1 9 0 0.58 0.35 3
 -2 9 0 4.94 0.45 3
 -2 9 0 5.56 0.58 2
 2 9 0 4.4 0.54 3
 2 -9 0 4.44 0.66 1
 -2 -9 0 4.78 0.54 2
 -2 -9 0 4.43 0.41 1
 3 9 0 3.72 0.56 3
 3 -9 0 3.42 0.64 1
 -3 9 0 3.6 0.44 3
 -3 9 0 3.23 0.52 2
 -3 -9 0 3.04 0.54 2
 -3 -9 0 3.62 0.32 1
 4 9 0 4.53 0.62 3
 -4 -9 0 4.85 0.64 2
 -4 9 0 3.99 0.62 2
 4 -9 0 3.47 0.7 1
 -4 -9 0 4.32 0.28 1
 -4 9 0 3.41 0.45 3
 -5 9 0 67.7 1.71 3
 5 -9 0 69.49 2.28 1
 -5 9 0 71.5 2.17 2
 -5 -9 0 67.91 2.15 2
 -6 -9 0 168.59 3.97 2
 -6 9 0 177.08 3.36 3
 -6 9 0 172.39 3.94 2
 6 9 0 169.69 3.88 3
 6 -9 0 173.34 4.13 1
 -7 9 0 51.12 2.02 2
 7 -9 0 51.24 2.15 1
 -7 9 0 48.94 1.58 3
 7 9 0 48.96 1.97 3
 -7 -9 0 52.98 2.11 2
 8 9 0 6.68 0.96 3
 -8 9 0 6.24 0.99 2
 8 -9 0 5.52 1.01 1
 -8 -9 0 6.45 1.02 2
 -9 9 0 3.8 0.9 2
 -9 -9 0 4.41 1.01 2
 9 -9 0 6.1 1.12 1
 9 9 0 3.03 0.86 3
 10 9 0 0.9 0.77 3
 -10 -9 0 -0.31 0.69 2
 -10 9 0 0.56 0.69 2
 10 -9 0 -0.27 0.81 1
 -11 -9 0 21.44 1.82 2
 11 9 0 21.25 1.76 3
 -11 9 0 21.9 1.79 2
 11 -9 0 19.48 1.63 1
 -12 -9 0 11.46 1.6 2
 12 -9 0 10.9 1.47 1
 12 9 0 9.49 1.4 3
 -12 9 0 10.59 1.52 2
 -13 -9 0 -0.5 0.99 2
 -13 9 0 0.71 0.96 2
 13 9 0 -0.32 0.83 3
 0 10 0 1999.99 28.8 2
 0 -10 0 1945.88 28.89 1
 0 10 0 2003.57 28.31 3
 1 -10 0 80.35 2.11 1
 -1 -10 0 83.76 1.9 1
 1 10 0 83.48 2.11 2
 1 10 0 82.21 2.01 3
 -1 10 0 81.16 1.87 3
 -1 10 0 82.79 2.08 2
 -2 -10 0 348.28 5.6 1
 2 -10 0 356.38 6.26 1
 -2 -10 0 346.06 6.05 2
 -2 10 0 349.85 5.64 3
 -2 10 0 354.99 6.07 2
 2 10 0 347.88 5.95 3
 -3 10 0 92.58 2.36 2
 3 -10 0 86.26 2.48 1
 -3 -10 0 93.23 2.41 2
 -3 -10 0 93.58 1.81 1
 -3 10 0 94.94 2 3
 3 10 0 95.68 2.37 3
 -4 -10 0 7.64 0.79 2
 -4 10 0 7.29 0.59 3
 4 10 0 7.45 0.77 3
 4 -10 0 6.98 0.88 1
 -4 -10 0 7.41 0.4 1
 -4 10 0 7.43 0.77 2
 5 -10 0 4.27 0.85 1
 -5 -10 0 3.91 0.75 2
 5 10 0 4.14 0.69 3
 -5 10 0 4.13 0.52 3
 -5 10 0 4.24 0.7 2
 -6 -10 0 22.65 1.39 2
 -6 10 0 23.54 1.34 2
 6 10 0 23.87 1.44 3
 -6 10 0 22.04 1.02 3
 6 -10 0 20.66 1.48 1
 -7 -10 0 4.92 0.89 2
 -7 10 0 3.32 0.76 2
 7 -10 0 5.32 0.98 1
 7 10 0 5.08 0.87 3
 -8 10 0 5.15 0.9 2
 8 10 0 6.37 1.03 3
 -8 -10 0 5.21 0.97 2
 8 -10 0 7.44 1.07 1
 -9 10 0 79.2 2.93 2
 9 -10 0 82.19 3.02 1
 -9 -10 0 85.07 3.06 2
 9 10 0 86.7 2.98 3
 -10 -10 0 21.77 1.76 2
 10 -10 0 23.46 1.75 1
 -10 10 0 21.07 1.7 2
 10 10 0 22.78 1.75 3
 -11 -10 0 5.58 1.19 2
 -11 10 0 7.35 1.24 2
 11 -10 0 6.41 1.27 1
 11 10 0 5.27 1.11 3
 -12 10 0 0.75 0.89 2
 12 10 0 2.11 0.97 3
 -12 -10 0 0.3 0.87 2
 12 -10 0 2.07 1.09 1
 -13 10 0 3.77 1.28 2
 13 -10 0 4.37 1.17 1
 13 10 0 3.41 1.24 3
 -13 -10 0 3.23 1.26 2
 0 11 0 1.13 0.43 2
 0 -11 0 -0.19 0.44 1
 0 11 0 1.33 0.43 3
 1 -11 0 96.36 2.46 1
 -1 11 0 100.61 2.22 3
 1 11 0 101.25 2.37 3
 -1 -11 0 104.12 2.27 1
 -1 11 0 99.7 2.44 2
 1 11 0 101.42 2.46 2
 -2 11 0 317.94 5.73 2
 -2 11 0 320.46 5.3 3
 -2 -11 0 312.98 5.25 1
 -2 -11 0 327.82 5.78 2
 2 -11 0 327.32 5.9 1
 2 11 0 317.34 5.62 3
 -3 -11 0 30.14 1.33 2
 -3 11 0 30.6 1.33 2
 -3 11 0 29.49 1.06 3
 3 11 0 30.69 1.37 3
 -3 -11 0 30.57 0.93 1
 3 -11 0 27.98 1.44 1
 -4 11 0 68.76 1.71 3
 4 -11 0 68.94 2.35 1
 -4 11 0 67.19 2.1 2
 -4 -11 0 69.97 2.17 2
 -4 -11 0 70.21 1.42 1
 4 11 0 67.63 2.13 3
 -5 11 0 36.88 1.23 3
 -5 11 0 35.91 1.6 2
 5 11 0 35.84 1.6 3
 -5 -11 0 36.69 1.64 2
 5 -11 0 35.95 1.79 1
 -6 -11 0 0.84 0.59 2
 6 11 0 0.15 0.61 3
 6 -11 0 0.21 0.79 1
 -6 11 0 -0.04 0.54 2
 -6 11 0 -0.57 0.44 3
 -7 11 0 6.61 0.92 2
 -7 -11 0 4.15 0.87 2
 7 -11 0 6.21 1.04 1
 7 11 0 4.6 0.87 3
 -8 11 0 25.67 1.59 2
 8 11 0 26.22 1.72 3
 -8 -11 0 23.81 1.65 2
 8 -11 0 24.49 1.81 1
 9 -11 0 3.75 1 1
 9 11 0 3.03 0.97 3
 -9 -11 0 3.11 0.97 2
 -9 11 0 1.89 0.79 2
 -10 11 0 53 2.53 2
 10 11 0 50.77 2.42 3
 10 -11 0 50.86 2.48 1
 -10 -11 0 55.51 2.66 2
 -11 11 0 45.55 2.4 2
 11 -11 0 43.72 2.39 1
 11 11 0 42.17 2.39 3
 -11 -11 0 45.6 2.54 2
 -12 11 0 41.26 2.49 2
 12 -11 0 41.8 2.48 1
 12 11 0 40.12 2.39 3
 -12 -11 0 35.64 2.41 2
 -13 -11 0 7.52 1.58 2
 -13 11 0 8.76 1.49 2
 13 11 0 7.14 1.43 3
 13 -11 0 7.35 1.33 1
 0 12 0 757.7 11.54 3
 0 12 0 750.08 11.87 2
 0 -12 0 757.99 11.83 1
 1 12 0 16.66 1.04 2
 1 12 0 18.19 0.99 3
 -1 12 0 15.12 0.89 3
 1 -12 0 15.6 1.1 1
 -1 12 0 14.75 0.93 2
 -1 -12 0 15.13 0.89 1
 -2 12 0 1.79 0.44 3
 -2 -12 0 1.16 0.4 1
 2 12 0 1.43 0.51 3
 -2 12 0 1.39 0.49 2
 2 -12 0 1.63 0.67 1
 -2 -12 0 1.05 0.51 2
 -3 12 0 1.46 0.43 3
 -3 12 0 0.77 0.49 2
 -3 -12 0 1.86 0.37 1
 3 -12 0 1.66 0.7 1
 3 12 0 1.85 0.62 3
 -3 -12 0 2.21 0.61 2
 -4 12 0 2.98 0.64 2
 -4 12 0 2.3 0.48 3
 4 12 0 3.8 0.72 3
 -4 -12 0 3.22 0.36 1
 -4 -12 0 3.51 0.68 2
 4 -12 0 2.55 0.77 1
 -5 12 0 72.01 1.83 3
 5 -12 0 70.11 2.48 1
 -5 12 0 69.04 2.29 2
 5 12 0 68.62 2.28 3
 -5 -12 0 68.8 2.33 2
 6 12 0 2.08 0.71 3
 -6 12 0 2.67 0.76 2
 6 -12 0 2.63 0.86 1
 -6 -12 0 2.06 0.72 2
 -7 -12 0 3.22 0.86 2
 7 -12 0 3.09 0.92 1
 7 12 0 3.4 0.85 3
 -7 12 0 5.41 0.93 2
 -8 -12 0 16.32 1.48 2
 8 -12 0 18.49 1.53 1
 -8 12 0 16.86 1.38 2
 8 12 0 18.88 1.5 3
 9 -12 0 29.62 2.02 1
 9 12 0 31.01 1.89 3
 -9 12 0 28.41 1.79 2
 -9 -12 0 29.12 1.9 2
 10 12 0 5.93 1.18 3
 10 -12 0 4.42 1.09 1
 -10 -12 0 4.63 1.11 2
 -10 12 0 4.67 1.06 2
 -11 12 0 9.66 1.38 2
 -11 -12 0 9.04 1.43 2
 11 -12 0 8.72 1.4 1
 11 12 0 9.7 1.37 3
 12 -12 0 7.9 1.36 1
 -12 12 0 7.58 1.4 2
 12 12 0 4.63 1.23 3
 -12 -12 0 5.72 1.4 2
 13 -12 0 4.59 1.26 1
 -13 -12 0 1.96 1.16 2
 -13 12 0 3.12 1.19 2
 13 12 0 5.78 1.38 3
 0 13 0 0.32 0.46 2
 0 -13 0 0.15 0.54 1
 0 13 0 -0.01 0.45 3
 -1 13 0 393.07 6.81 2
 1 -13 0 383.09 6.82 1
 1 13 0 380.76 6.79 2
 -1 13 0 379.69 6.38 3
 1 13 0 376.29 6.55 3
 -1 -13 0 387 6.5 1
 -2 13 0 6.08 0.74 2
 2 -13 0 5.5 0.82 1
 2 13 0 4.77 0.74 3
 -2 -13 0 5.84 0.6 1
 -2 -13 0 6.16 0.73 2
 -2 13 0 6.28 0.65 3
 -3 13 0 44.1 1.43 3
 3 -13 0 45.01 1.9 1
 -3 13 0 46.99 1.76 2
 -3 -13 0 47.83 1.78 2
 -3 -13 0 46.11 1.32 1
 3 13 0 45.27 1.72 3
 -4 13 0 174.46 3.97 2
 4 13 0 176.37 3.95 3
 -4 -13 0 169.87 3.98 2
 -4 13 0 180.86 3.4 3
 4 -13 0 175.05 4.2 1
 5 -13 0 23.28 1.59 1
 -5 13 0 23.6 1.08 3
 -5 13 0 21.42 1.32 2
 -5 -13 0 22.99 1.46 2
 5 13 0 22.51 1.4 3
 -6 13 0 11.93 1.15 2
 6 -13 0 12.64 1.3 1
 -6 -13 0 14.75 1.24 2
 6 13 0 10.41 1.1 3
 7 13 0 38.17 1.89 3
 -7 -13 0 31.08 1.79 2
 7 -13 0 32.34 2 1
 -7 13 0 34.98 1.84 2
 -8 13 0 64.03 2.56 2
 8 13 0 64.71 2.55 3
 8 -13 0 59.64 2.7 1
 -8 -13 0 62.74 2.61 2
 9 -13 0 13.43 1.45 1
 9 13 0 13.75 1.39 3
 -9 13 0 10.79 1.26 2
 -9 -13 0 11.98 1.38 2
 -10 -13 0 0.39 0.82 2
 10 -13 0 0.07 0.92 1
 -10 13 0 0.75 0.86 2
 10 13 0 1.53 0.93 3
 -11 13 0 -0.12 0.78 2
 11 -13 0 -0.36 0.91 1
 -11 -13 0 -0.32 0.91 2
 11 13 0 1.73 1.01 3
 12 13 0 1.27 1.07 3
 -12 13 0 -0.16 0.89 2
 12 -13 0 1.12 1.08 1
 -12 -13 0 2.37 1.14 2
 0 14 0 32.36 1.42 2
 0 14 0 31.02 1.34 3
 0 -14 0 31.65 1.41 1
 1 -14 0 41.59 1.72 1
 -1 -14 0 40.75 1.48 1
 1 14 0 40.47 1.58 3
 -1 14 0 42.8 1.63 2
 -1 14 0 42.85 1.52 3
 1 14 0 41.99 1.65 2
 2 -14 0 22.17 1.37 1
 -2 14 0 21.69 1.22 2
 -2 -14 0 21.58 1.03 1
 2 14 0 23.6 1.26 3
 -2 -14 0 22.48 1.29 2
 -2 14 0 20.87 1.05 3
 -3 14 0 226.9 4.77 2
 3 -14 0 225.15 4.94 1
 -3 -14 0 234.7 4.11 1
 -3 -14 0 231.93 4.83 2
 -3 14 0 229.57 4.22 3
 3 14 0 223.19 4.66 3
 -4 14 0 3.81 0.6 3
 4 14 0 3.11 0.8 3
 -4 14 0 3.44 0.75 2
 4 -14 0 3.47 0.87 1
 -4 -14 0 3.18 0.74 2
 -5 -14 0 44.5 1.95 2
 5 -14 0 47.98 2.23 1
 -5 14 0 45.01 1.9 2
 5 14 0 46.54 2 3
 -6 14 0 9.84 1.11 2
 6 -14 0 10.26 1.21 1
 -6 -14 0 10.69 1.15 2
 6 14 0 9.68 1.1 3
 7 -14 0 3.15 0.96 1
 7 14 0 2.19 0.79 3
 -7 14 0 1.58 0.81 2
 -7 -14 0 1.8 0.8 2
 -8 14 0 22.98 1.61 2
 8 -14 0 27.84 1.98 1
 -8 -14 0 28.13 1.88 2
 8 14 0 23.63 1.67 3
 9 14 0 9.95 1.33 3
 9 -14 0 10.78 1.39 1
 -9 -14 0 14.13 1.47 2
 -9 14 0 9.05 1.21 2
 -10 -14 0 2.84 1.11 2
 10 -14 0 1.96 0.99 1
 10 14 0 2.37 1.04 3
 -10 14 0 5.63 1.17 2
 11 -14 0 -0.54 0.89 1
 -11 -14 0 -0.26 0.96 2
 11 14 0 1.55 0.97 3
 -11 14 0 -1.25 0.71 2
 12 14 0 3.46 1.2 3
 -12 -14 0 5.66 1.37 2
 12 -14 0 3.33 1.17 1
 -12 14 0 4.57 1.26 2
 0 15 0 0.21 0.48 3
 0 -15 0 -0.08 0.54 1
 0 15 0 -0.05 0.44 2
 1 -15 0 18.68 1.24 1
 -1 15 0 19.87 1.2 2
 -1 15 0 18 1.1 3
 1 15 0 21.91 1.3 2
 1 15 0 20.35 1.17 3
 -1 -15 0 20.61 1.15 1
 -2 15 0 11.49 0.89 3
 -2 -15 0 11.27 0.99 2
 2 15 0 13.04 1.06 3
 2 -15 0 8.45 1.01 1
 -2 15 0 10.22 0.93 2
 -2 -15 0 11.69 0.88 1
 -3 -15 0 -1 0.47 2
 -3 15 0 -0.48 0.47 2
 -3 15 0 -0.16 0.49 3
 3 15 0 0.4 0.6 3
 3 -15 0 0.84 0.77 1
 -3 -15 0 -0.52 0.41 1
 4 15 0 1.73 0.71 3
 -4 15 0 0.71 0.52 3
 -4 -15 0 1.22 0.72 2
 -4 15 0 0.59 0.58 2
 4 -15 0 -0.76 0.7 1
 -5 15 0 11.32 1.1 2
 5 -15 0 10.9 1.23 1
 -5 -15 0 11.48 1.14 2
 5 15 0 10.69 1.16 3
 -6 -15 0 1.37 0.75 2
 6 15 0 0.33 0.67 3
 6 -15 0 1.08 0.8 1
 -6 15 0 1.31 0.68 2
 -7 -15 0 0.58 0.69 2
 7 -15 0 1.82 0.88 1
 -7 15 0 -0.13 0.68 2
 7 15 0 1.79 0.88 3
 -8 -15 0 -0.48 0.65 2
 8 15 0 0.3 0.75 3
 -8 15 0 -0.17 0.62 2
 8 -15 0 -0.37 0.77 1
 -9 -15 0 3.27 1.01 2
 9 -15 0 2.59 1 1
 9 15 0 2.74 0.98 3
 -9 15 0 4.21 1.06 2
 10 15 0 5.94 1.24 3
 -10 15 0 5.73 1.2 2
 -10 -15 0 6.17 1.26 2
 10 -15 0 3.87 1.17 1
 -11 15 0 10.88 1.51 2
 11 -15 0 12.25 1.66 1
 11 15 0 11.53 1.6 3
 -11 -15 0 12.84 1.62 2
 12 15 0 11.97 1.6 3
 -12 -15 0 16.01 1.87 2
 -12 15 0 15.67 1.76 2
 12 -15 0 13.59 1.72 1
 0 -16 0 75.41 2.32 1
 0 16 0 80.31 2.45 2
 0 16 0 75.66 2.24 3
 1 16 0 3 0.72 3
 -1 -16 0 4.8 0.72 1
 -1 16 0 4.82 0.72 3
 1 -16 0 6.09 0.87 1
 -1 16 0 4.58 0.76 2
 1 16 0 3.89 0.73 2
 -2 16 0 7.69 0.93 2
 2 16 0 6.39 0.84 3
 -2 -16 0 7.57 0.76 1
 2 -16 0 7.71 0.99 1
 -2 16 0 7.99 0.81 3
 -2 -16 0 8.11 0.95 2
 3 16 0 57.67 2.15 3
 -3 16 0 58.84 1.79 3
 -3 -16 0 58.45 2.18 2
 -3 16 0 60.65 2.21 2
 3 -16 0 55.91 2.29 1
 -4 16 0 45.1 1.94 2
 4 16 0 41.45 1.88 3
 -4 -16 0 44.55 2 2
 4 -16 0 43.07 2.07 1
 -5 -16 0 7.86 1.09 2
 5 16 0 7.57 1.03 3
 -5 16 0 7.82 1.04 2
 5 -16 0 6.6 1.1 1
 6 -16 0 22.16 1.77 1
 -6 16 0 27.43 1.69 2
 6 16 0 20.7 1.54 3
 -6 -16 0 22.37 1.59 2
 -7 -16 0 -0.04 0.62 2
 7 -16 0 0.2 0.87 1
 -7 16 0 0.29 0.74 2
 7 16 0 -1.02 0.62 3
 -8 16 0 2.89 0.92 2
 8 -16 0 3.93 1.14 1
 -8 -16 0 2.87 1 2
 8 16 0 2.54 0.98 3
 9 16 0 11.43 1.43 3
 9 -16 0 12.29 1.49 1
 -9 16 0 12.5 1.46 2
 -9 -16 0 9.22 1.36 2
 -10 -16 0 9.38 1.45 2
 -10 16 0 8.08 1.34 2
 10 -16 0 9.75 1.46 1
 10 16 0 8.41 1.4 3
 11 16 0 43.51 2.57 3
 11 -16 0 48.79 2.85 1
 -11 16 0 41.54 2.45 2
 -11 -16 0 40.7 2.6 2
 12 16 0 1.2 1.09 3
 12 -16 0 4.63 1.38 1
 0 -17 0 0.28 0.63 1
 0 17 0 -0.04 0.56 2
 0 17 0 -0.2 0.55 3
 1 -17 0 1.86 0.7 1
 -1 -17 0 3.32 0.69 1
 1 17 0 3.13 0.7 3
 -1 17 0 2.69 0.7 2
 -1 17 0 3.29 0.69 3
 1 17 0 2.15 0.67 2
 2 17 0 28.64 1.57 3
 -2 17 0 30.16 1.43 3
 -2 -17 0 31.12 1.6 2
 2 -17 0 28.65 1.71 1
 -2 17 0 31.6 1.59 2
 -2 -17 0 29.13 1.29 1
 3 17 0 29.72 1.63 3
 -3 17 0 28.88 1.62 2
 -3 -17 0 29.73 1.62 2
 3 -17 0 29.63 1.73 1
 -3 17 0 28.63 1.33 3
 -4 17 0 6.57 0.99 2
 -4 -17 0 6.57 0.98 2
 4 17 0 4.59 0.96 3
 4 -17 0 5 1.02 1
 -5 17 0 1.98 0.8 2
 5 -17 0 2.62 0.94 1
 5 17 0 0.19 0.72 3
 -5 -17 0 0.12 0.73 2
 -6 -17 0 3.5 0.95 2
 6 17 0 2.35 0.85 3
 -6 17 0 3 0.85 2
 6 -17 0 3.1 0.94 1
 7 17 0 -0.64 0.64 3
 -7 17 0 -0.14 0.68 2
 -7 -17 0 -0.75 0.71 2
 7 -17 0 0.44 0.84 1
 8 -17 0 2.48 1.05 1
 -8 17 0 2.17 0.92 2
 8 17 0 4.93 1.08 3
 -8 -17 0 5.29 1.12 2
 9 17 0 8.93 1.33 3
 -9 -17 0 6.83 1.3 2
 -9 17 0 11.37 1.43 2
 9 -17 0 9.47 1.5 1
 10 -17 0 8.04 1.41 1
 -10 17 0 8.66 1.42 2
 10 17 0 6.5 1.36 3
 -10 -17 0 9.7 1.5 2
 11 17 0 2.61 1.24 3
 11 -17 0 2.66 1.19 1
 -11 -17 0 1.56 1.07 2
 0 18 0 8.89 1.01 2
 0 18 0 7.82 0.91 3
 0 -18 0 7.94 0.94 1
 -1 -18 0 21.97 1.3 1
 -1 18 0 25.75 1.51 2
 -1 18 0 21.19 1.33 3
 1 18 0 24.93 1.46 2
 1 18 0 25.91 1.46 3
 1 -18 0 22.16 1.49 1
 -2 -18 0 1.19 0.66 2
 2 18 0 1.35 0.73 3
 -2 18 0 1.48 0.65 3
 2 -18 0 0.61 0.75 1
 -2 -18 0 2.13 0.61 1
 -2 18 0 0.91 0.63 2
 -3 -18 0 5.32 0.94 2
 -3 18 0 4.37 0.89 2
 3 -18 0 3.63 0.99 1
 3 18 0 4.63 0.87 3
 4 -18 0 0.88 0.84 1
 4 18 0 1.66 0.78 3
 -4 18 0 2.54 0.83 2
 -4 -18 0 2.26 0.86 2
 5 18 0 9.84 1.16 3
 -5 18 0 13.42 1.28 2
 5 -18 0 13.37 1.45 1
 -5 -18 0 12.44 1.29 2
 6 18 0 9.94 1.22 3
 6 -18 0 8.11 1.26 1
 -6 18 0 8.49 1.14 2
 -6 -18 0 7.3 1.14 2
 -7 18 0 3.31 0.99 2
 -7 -18 0 4.26 1.05 2
 7 18 0 3.77 1.05 3
 7 -18 0 2.91 1.06 1
 -8 -18 0 7.29 1.24 2
 -8 18 0 5.94 1.23 2
 8 -18 0 7.43 1.36 1
 8 18 0 9.15 1.32 3
 9 18 0 0.46 0.89 3
 -9 -18 0 -0.17 0.87 2
 -9 18 0 0.13 0.88 2
 9 -18 0 0.3 0.91 1
 10 -18 0 3.24 1.19 1
 10 18 0 1.68 1.12 3
 -10 -18 0 2.63 1.21 2
 -11 -18 0 1.03 1.06 2
 11 -18 0 1.07 1.08 1
 11 18 0 0.6 1.03 3
 0 19 0 1.25 0.64 2
 0 -19 0 1.35 0.65 1
 0 19 0 1.35 0.69 3
 -1 19 0 4.14 0.85 2
 1 -19 0 4.55 0.91 1
 -1 -19 0 5.9 0.81 1
 1 19 0 4.32 0.86 2
 1 19 0 5.66 0.92 3
 -1 19 0 6.02 0.85 3
 2 19 0 1.24 0.75 3
 -2 19 0 0.91 0.67 3
 2 -19 0 0.84 0.8 1
 -2 19 0 2.17 0.78 2
 -2 -19 0 0.79 0.65 2
 -3 19 0 14.17 1.26 2
 3 19 0 11.74 1.23 3
 -3 -19 0 14.28 1.28 2
 3 -19 0 12.59 1.37 1
 -4 19 0 -0.41 0.67 2
 -4 -19 0 0.69 0.71 2
 4 -19 0 0.13 0.84 1
 4 19 0 0.24 0.7 3
 5 19 0 6.13 1.08 3
 -5 -19 0 4.03 0.98 2
 -5 19 0 5.33 1.01 2
 5 -19 0 3.85 1.06 1
 6 19 0 1.37 0.84 3
 -6 19 0 0.82 0.84 2
 6 -19 0 1.3 0.94 1
 -6 -19 0 2.01 0.91 2
 -7 -19 0 0.07 0.86 2
 7 -19 0 -0.73 0.79 1
 7 19 0 -0.17 0.8 3
 -7 19 0 0.34 0.76 2
 -8 19 0 17.59 1.65 2
 -8 -19 0 16.77 1.66 2
 8 -19 0 17.12 1.71 1
 8 19 0 19.21 1.69 3
 -9 -19 0 0.78 0.95 2
 9 19 0 0.46 0.89 3
 9 -19 0 -0.45 0.96 1
 10 -19 0 33.58 2.45 1
 -10 -19 0 32.21 2.45 2
 10 19 0 31.76 2.33 3
 0 20 0 80.8 2.78 2
 0 20 0 72.69 2.46 3
 0 -20 0 72.65 2.51 1
 -1 -20 0 17.12 1.29 1
 -1 20 0 17.49 1.3 3
 1 20 0 16.3 1.39 2
 1 20 0 18.2 1.39 3
 -1 20 0 17.72 1.42 2
 1 -20 0 15.31 1.35 1
 -1 -20 0 15.62 1.32 2
 -2 -20 0 2.27 0.83 2
 -2 20 0 1.04 0.74 2
 2 20 0 0.11 0.7 3
 2 -20 0 2.28 0.86 1
 -3 -20 0 -0.4 0.7 2
 3 -20 0 -0.57 0.69 1
 3 20 0 0.85 0.71 3
 -3 20 0 0.61 0.73 2
 -4 20 0 7.98 1.15 2
 -4 -20 0 7.69 1.14 2
 4 20 0 9.97 1.16 3
 4 -20 0 8.75 1.22 1
 5 -20 0 13.5 1.51 1
 5 20 0 10.9 1.32 3
 -5 20 0 13.8 1.41 2
 -5 -20 0 10.26 1.35 2
 6 20 0 21.28 1.74 3
 -6 20 0 20.9 1.65 2
 -6 -20 0 18.7 1.64 2
 7 20 0 10.82 1.45 3
 7 -20 0 9.41 1.42 1
 -7 -20 0 10.51 1.41 2
 -7 20 0 13.05 1.52 2
 8 -20 0 2.07 1.05 1
 8 20 0 -0.35 0.87 3
 -8 -20 0 1.84 1.04 2
 9 -20 0 4.75 1.31 1
 9 20 0 4.11 1.26 3
 -9 -20 0 4.93 1.27 2
 10 20 0 0.72 1.1 3
 10 -20 0 0.33 1.09 1
 -10 -20 0 1.07 1.14 2
 0 21 0 1.03 0.72 2
 0 -21 0 1.75 0.73 1
 0 21 0 2.36 0.81 3
 -1 21 0 51.27 2.23 2
 1 21 0 51 2.17 3
 -1 21 0 47.42 1.99 3
 -1 -21 0 52.95 2.33 2
 1 -21 0 55 2.31 1
 2 21 0 2.18 0.83 3
 -2 -21 0 0.78 0.71 2
 -2 21 0 1.02 0.81 2
 2 -21 0 0.71 0.75 1
 3 21 0 2.2 0.81 3
 -3 21 0 0.99 0.82 2
 -3 -21 0 0.33 0.78 2
 3 -21 0 0.17 0.77 1
 -4 -21 0 40.82 2.15 2
 4 -21 0 40.91 2.25 1
 4 21 0 38.95 2.13 3
 -4 21 0 43.06 2.23 2
 5 21 0 31.6 2 3
 5 -21 0 34.08 2.17 1
 -5 21 0 33.27 2.05 2
 -5 -21 0 31.45 2 2
 -6 -21 0 9.47 1.39 2
 6 21 0 11.77 1.4 3
 6 -21 0 10.18 1.49 1
 -6 21 0 11.48 1.44 2
 7 21 0 35.61 2.25 3
 7 -21 0 33.25 2.29 1
 -7 -21 0 31.26 2.12 2
 -8 -21 0 -1.01 0.77 2
 8 -21 0 1.07 1.07 1
 8 21 0 -0.54 0.9 3
 9 21 0 4.36 1.26 3
 9 -21 0 3.43 1.24 1
 -9 -21 0 5.68 1.39 2
 0 22 0 39.07 1.91 3
 0 22 0 39.27 2.11 2
 0 -22 0 42.08 1.97 1
 1 -22 0 0.12 0.77 1
 -1 22 0 0.9 0.8 2
 1 22 0 2.71 0.86 3
 -1 -22 0 1.78 0.77 2
 -2 22 0 23.13 1.73 2
 2 -22 0 28.48 1.81 1
 -2 -22 0 25.04 1.71 2
 2 22 0 27.02 1.68 3
 3 -22 0 102.86 3.5 1
 -3 22 0 102.5 3.44 2
 3 22 0 93.74 3.16 3
 -3 -22 0 97.27 3.39 2
 4 -22 0 41.19 2.37 1
 -4 -22 0 40.61 2.26 2
 4 22 0 41.12 2.23 3
 -4 22 0 41.47 2.19 2
 5 22 0 33.34 2.12 3
 -5 -22 0 34.4 2.11 2
 5 -22 0 30.7 2.19 1
 -5 22 0 33.04 2.1 2
 -6 -22 0 38.57 2.29 2
 6 -22 0 36.81 2.36 1
 6 22 0 34.69 2.16 3
 -7 -22 0 9.46 1.42 2
 7 22 0 13.16 1.58 3
 7 -22 0 9.08 1.52 1
 -8 -22 0 17.49 1.8 2
 8 22 0 18.82 1.85 3
 8 -22 0 16.93 1.86 1
 0 23 0 1.39 0.82 2
 -1 23 0 15.07 1.49 2
 1 -23 0 14.47 1.4 1
 -1 -23 0 16 1.49 2
 1 23 0 16.76 1.42 3
 2 23 0 24.1 1.74 3
 -2 23 0 23.46 1.71 2
 2 -23 0 28.29 1.9 1
 -2 -23 0 24.69 1.71 2
 -3 23 0 6.61 1.19 2
 3 23 0 5.85 1.15 3
 -3 -23 0 6.16 1.21 2
 3 -23 0 5.21 1.13 1
 -4 23 0 14.46 1.57 2
 -4 -23 0 11.4 1.41 2
 4 23 0 15.74 1.49 3
 4 -23 0 16.68 1.68 1
 5 23 0 19.89 1.69 3
 5 -23 0 18.39 1.78 1
 -5 -23 0 22.1 1.79 2
 6 23 0 1.12 0.9 3
 6 -23 0 1.45 1.08 1
 -6 -23 0 0.11 1 2
 -7 -23 0 3.25 1.12 2
 7 23 0 5.64 1.27 3
 7 -23 0 3.72 1.21 1
 8 23 0 0.5 1.03 3
 8 -23 0 0.54 1.07 1
 -8 -23 0 -1.83 0.82 2
 0 -24 0 5.04 1.06 2
 0 24 0 4.9 1.14 2
 1 -24 0 2.59 0.93 1
 -1 -24 0 3.45 1.02 2
 1 24 0 4.37 1.06 3
 -1 24 0 1.16 0.91 2
 -2 -24 0 0.1 0.77 2
 -2 24 0 0.88 0.85 2
 2 24 0 1.87 0.93 3
 2 -24 0 0.65 0.84 1
 3 24 0 -0.05 0.86 3
 3 -24 0 1.48 0.92 1
 -3 24 0 1.09 0.94 2
 -3 -24 0 -1.77 0.74 2
 4 -24 0 1.69 0.97 1
 -4 -24 0 1.03 0.94 2
 4 24 0 0.48 0.83 3
 -5 -24 0 4.07 1.23 2
 5 -24 0 3.28 1.18 1
 5 24 0 4.6 1.2 3
 -6 -24 0 5.05 1.25 2
 6 -24 0 3.16 1.19 1
 6 24 0 5.58 1.28 3
 7 -24 0 2.16 1.13 1
 -7 -24 0 -1.28 0.89 2
 7 24 0 2.97 1.14 3
 0 -25 0 2.15 1.01 2
 -1 -25 0 21.12 1.82 2
 -1 25 0 24.77 1.9 2
 2 25 0 1.82 0.95 3
 -2 -25 0 1.42 0.95 2
 2 -25 0 1.59 0.95 1
 3 -25 0 1.42 0.91 1
 -3 -25 0 -0.56 0.83 2
 3 25 0 1.29 0.98 3
 -4 -25 0 1.26 1.03 2
 4 25 0 1.66 1.01 3
 4 -25 0 1.63 1.02 1
 5 25 0 1.29 1.05 3
 -5 -25 0 0.34 1.01 2
 5 -25 0 1.25 1.1 1
 6 25 0 2.02 1.09 3
 6 -25 0 1.24 1.09 1
 -6 -25 0 -0.37 0.95 2
 -1 -26 0 6.51 1.32 2
 2 -26 0 7.16 1.27 1
 -2 -26 0 5.16 1.21 2
 3 -26 0 11.52 1.45 1
 3 26 0 9.55 1.36 3
 -3 -26 0 11.93 1.52 2
 4 -26 0 7.88 1.36 1
 4 26 0 10.3 1.46 3
 -4 -26 0 6.37 1.32 2
 5 -26 0 15.42 1.82 1
 -5 -26 0 14 1.74 2
 5 26 0 16.52 1.76 3
 -3 -27 0 4.49 1.26 2
 3 -27 0 7.17 1.34 1
 -14 0 1 1.21 1.05 2
 -13 0 1 0.76 0.92 2
 12 0 -1 -0.13 0.83 3
 -12 0 1 0.42 0.91 2
 11 0 -1 0.83 0.78 3
 -11 0 1 0.09 0.82 2
 10 0 -1 -0.78 0.61 3
 -10 0 1 0.1 0.65 2
 9 0 -1 -1.28 0.58 3
 -9 0 1 -0.61 0.66 2
 9 0 -1 -0.4 0.52 1
 8 0 -1 -0.06 0.51 1
 8 0 -1 0.97 0.66 3
 -8 0 1 -0.59 0.57 2
 7 0 -1 -0.41 0.47 3
 7 0 -1 -0.4 0.44 1
 -7 0 1 -0.42 0.48 2
 -6 0 1 0.7 0.48 2
 6 0 -1 -0.03 0.41 3
 6 0 -1 0.05 0.37 1
 5 0 -1 0.02 0.34 1
 -5 0 1 0.09 0.36 2
 5 0 -1 0.09 0.34 3
 4 0 -1 -0.92 0.32 3
 -4 0 1 -0.55 0.35 2
 4 0 -1 -0.62 0.32 1
 3 0 -1 -1.41 0.29 3
 3 0 -1 0.13 0.3 1
 -3 0 1 -0.67 0.31 2
 2 0 -1 0.38 0.2 1
 -2 0 1 -0.33 0.2 2
 2 0 -1 -0.17 0.21 3
 1 0 -1 0.01 0.07 1
 1 0 -1 0.42 0.13 3
 0 0 1 -0.09 0.05 3
 0 0 -1 -0.15 0.06 1
 0 0 -1 -0.12 0.05 2
 1 0 1 -0.21 0.16 3
 -1 0 -1 -0.68 0.18 2
 1 0 1 -0.71 0.16 1
 2 0 1 -0.76 0.2 3
 2 0 1 -0.38 0.21 1
 -2 0 -1 -0.46 0.24 2
 3 0 1 0.68 0.27 1
 -3 0 -1 -0.03 0.27 2
 4 0 1 0.03 0.27 1
 -4 0 -1 0.09 0.32 2
 4 0 1 -0.29 0.27 3
 5 0 1 -0.32 0.29 3
 5 0 1 -0.09 0.37 1
 -5 0 -1 0.27 0.37 2
 6 0 1 0.35 0.39 3
 6 0 1 0.5 0.46 1
 -6 0 -1 -0.08 0.44 2
 -7 0 -1 -0.04 0.51 2
 7 0 1 0.13 0.48 1
 7 0 1 0.3 0.45 3
 -8 0 -1 -0.29 0.59 2
 8 0 1 -0.37 0.52 3
 8 0 1 0.89 0.58 1
 9 0 1 -0.66 0.55 1
 -9 0 -1 0.5 0.7 2
 9 0 1 -0.17 0.62 3
 -10 0 -1 -0.01 0.68 2
 10 0 1 0 0.62 3
 -11 0 -1 -0.66 0.77 2
 11 0 1 -0.53 0.67 3
 -12 0 -1 0.01 0.78 2
 -13 0 -1 0.21 0.91 2
 -14 0 -1 1.06 1.17 2
 -14 1 1 5.28 1.42 2
 -14 -1 1 4.3 1.4 2
 -13 -1 1 3.76 1.21 2
 -13 1 1 4.22 1.22 2
 13 1 -1 3.64 1.13 3
 -12 -1 1 8.57 1.38 2
 12 -1 -1 7.74 1.21 3
 -12 1 1 6.93 1.31 2
 12 1 -1 7.8 1.23 3
 11 -1 -1 1.51 0.81 3
 -11 1 1 0.79 0.92 2
 -11 -1 1 1.14 0.83 2
 11 1 -1 1.59 0.87 3
 -10 1 1 9.24 1.22 2
 10 1 -1 8.2 1.05 3
 10 -1 -1 8.78 1.04 3
 -10 -1 1 9.48 1.23 2
 -9 -1 1 14.58 1.29 2
 9 1 -1 12.3 1.15 3
 9 -1 -1 14.65 1.17 3
 9 -1 -1 13.27 1.05 1
 -9 1 1 13.27 1.24 2
 8 1 -1 485.86 7.77 1
 -8 -1 1 466.73 8.56 2
 8 -1 -1 477.32 8 1
 8 -1 -1 469.73 8.09 3
 8 1 -1 481.13 8.21 3
 -8 1 1 474.06 8.57 2
 7 1 -1 74.56 1.84 1
 7 -1 -1 72.38 2.01 1
 7 -1 -1 70.21 2.05 3
 -7 -1 1 73.15 2.29 2
 -7 1 1 74.46 2.28 2
 7 1 -1 70.63 2.1 3
 -6 1 1 76.05 2.15 2
 6 1 -1 74.52 1.75 1
 6 -1 -1 73.72 1.9 1
 6 1 -1 76.44 2.03 3
 -6 -1 1 76.02 2.18 2
 6 -1 -1 75.06 1.97 3
 -5 1 1 14.43 0.86 2
 5 -1 -1 14.4 0.81 3
 5 1 -1 15.81 0.86 3
 5 1 -1 13.39 0.67 1
 -5 -1 1 14.57 0.87 2
 5 -1 -1 13.35 0.78 1
 4 1 -1 73.5 1.71 3
 4 -1 -1 73.25 1.67 1
 4 1 -1 71.58 1.49 1
 4 -1 -1 73.47 1.67 3
 -4 1 1 72.26 1.77 2
 -4 -1 1 75.91 1.81 2
 3 -1 -1 419.06 6.45 3
 3 -1 -1 413.89 6.54 1
 3 1 -1 421.98 6.49 3
 -3 1 1 424.12 6.59 2
 -3 -1 1 438.16 6.64 2
 3 1 -1 427.91 6.41 1
 2 1 -1 375.98 5.55 1
 2 -1 -1 356.52 5.54 1
 -2 -1 1 365.37 5.56 2
 -2 1 1 354.79 5.5 2
 2 -1 -1 358.09 5.45 3
 -1 -1 1 4.39 0.25 2
 1 -1 -1 4.37 0.28 3
 1 1 -1 3.97 0.17 1
 -1 1 1 4.68 0.21 2
 0 1 -1 23.19 0.55 2
 0 1 -1 23.2 0.53 1
 0 1 1 23.12 0.54 3
 0 1 -1 21.92 0.49 3
 0 -1 -1 21.42 0.53 1
 1 1 1 673.36 9.91 3
 -1 -1 -1 705.23 10.07 2
 -1 -1 -1 694.55 10.32 1
 1 -1 1 668.95 11.14 3
 1 -1 1 680.04 10.1 1
 2 1 1 288.27 4.49 1
 2 1 1 298.15 4.5 3
 2 -1 1 291.38 4.58 1
 -2 1 -1 297.59 4.68 2
 2 -1 1 290.97 4.4 3
 -2 -1 -1 295.49 4.64 2
 3 1 1 870.29 12.73 3
 -3 -1 -1 887.54 13.07 2
 -3 1 -1 889.53 13.09 2
 3 -1 1 880.72 12.99 1
 3 -1 1 866.87 12.64 3
 3 1 1 878.68 12.87 1
 4 -1 1 341.45 5.36 3
 4 1 1 347.09 5.46 3
 -4 1 -1 339.85 5.76 2
 4 -1 1 336.71 5.53 1
 -4 -1 -1 345.22 5.78 2
 4 1 1 338.86 5.37 1
 5 1 1 361.03 5.87 3
 -5 -1 -1 362.5 6.27 2
 5 1 1 357.75 5.77 1
 -5 1 -1 350.02 6.22 2
 5 -1 1 365.16 5.79 3
 5 -1 1 360.4 5.97 1
 6 1 1 19.06 0.94 1
 -6 -1 -1 16.9 1.07 2
 6 -1 1 16.32 0.87 3
 6 -1 1 14.19 0.94 1
 6 1 1 16.96 0.91 3
 -6 1 -1 17.1 1.06 2
 7 1 1 124.08 2.71 1
 -7 -1 -1 122.9 3.2 2
 7 1 1 128.45 2.92 3
 7 -1 1 124.13 2.87 1
 7 -1 1 122.62 2.78 3
 -7 1 -1 123.31 3.22 2
 -8 -1 -1 247.58 5.42 2
 8 1 1 258.44 4.77 1
 8 -1 1 257.68 4.97 1
 -8 1 -1 258.44 5.54 2
 8 1 1 251.21 4.94 3
 8 -1 1 247.94 4.84 3
 9 1 1 32.52 1.46 1
 9 1 1 36.29 1.67 3
 -9 -1 -1 29.26 1.78 2
 9 -1 1 32.62 1.59 1
 9 -1 1 29 1.5 3
 -9 1 -1 34 1.94 2
 -10 1 -1 8.72 1.21 2
 10 1 1 8.75 1.04 3
 10 -1 1 9.79 1.04 3
 -10 -1 -1 6.33 1.09 2
 11 -1 1 2.09 0.81 3
 11 1 1 0.83 0.76 3
 -11 -1 -1 2.4 0.95 2
 -11 1 -1 0.94 0.8 2
 -12 1 -1 1.19 0.94 2
 -12 -1 -1 1.55 0.97 2
 12 1 1 3.67 0.99 3
 -13 1 -1 0.69 1.06 2
 -13 -1 -1 2.24 1.08 2
 -14 -1 -1 -0.79 0.97 2
 -14 1 -1 0.43 0.99 2
 -14 -2 1 18.29 1.99 2
 -14 2 1 18 1.97 2
 -13 -2 1 13.73 1.69 2
 -13 2 1 16.38 1.76 2
 13 2 -1 18.44 1.75 3
 12 2 -1 46.18 2.36 3
 -12 2 1 47.38 2.54 2
 -12 -2 1 52.99 2.67 2
 12 -2 -1 46.92 2.28 3
 11 -2 -1 51.65 2.21 3
 -11 2 1 44.52 2.33 2
 -11 -2 1 46.52 2.39 2
 11 2 -1 49.72 2.27 3
 10 -2 -1 4.05 0.84 3
 -10 2 1 4.13 0.95 2
 10 2 -1 4.35 0.93 3
 10 -2 -1 4.35 0.8 1
 -10 -2 1 3.42 0.93 2
 9 -2 -1 121.27 3.16 3
 -9 2 1 123.24 3.58 2
 9 -2 -1 124.21 3.08 1
 -9 -2 1 119.55 3.5 2
 9 2 -1 123.64 3.31 3
 8 -2 -1 103.81 2.72 3
 -8 2 1 102.78 2.99 2
 8 2 -1 103.65 2.31 1
 -8 -2 1 103.23 3.01 2
 8 2 -1 101.88 2.79 3
 8 -2 -1 100.63 2.63 1
 7 -2 -1 155.22 3.28 3
 7 2 -1 152.18 3.38 3
 7 -2 -1 147.75 3.26 1
 -7 -2 1 151.12 3.58 2
 7 2 -1 149.69 2.89 1
 -7 2 1 152.97 3.56 2
 6 2 -1 26.32 1.19 3
 6 -2 -1 26.58 1.13 3
 6 2 -1 26.84 0.91 1
 -6 2 1 25.19 1.21 2
 -6 -2 1 28.89 1.3 2
 6 -2 -1 23.48 1.12 1
 5 -2 -1 359.44 5.92 3
 5 2 -1 361.47 6.03 3
 -5 -2 1 365.03 6.24 2
 5 2 -1 365.32 5.66 1
 -5 2 1 373.47 6.22 2
 5 -2 -1 355.6 6.04 1
 -4 -2 1 281.12 4.91 2
 4 -2 -1 283.73 4.69 3
 -4 2 1 285.88 4.88 2
 4 2 -1 295.84 4.82 3
 4 -2 -1 282.98 4.83 1
 4 2 -1 288.42 4.46 1
 3 -2 -1 55.77 1.37 1
 3 -2 -1 56.98 1.29 3
 3 2 -1 56.84 1.05 1
 3 2 -1 54.68 1.33 3
 -3 2 1 53.42 1.32 2
 -3 -2 1 58.36 1.42 2
 -2 2 1 1563.93 22.18 2
 2 -2 -1 1554.88 21.95 3
 2 -2 -1 1514.54 23.07 1
 2 2 -1 1518.1 21.89 3
 -2 -2 1 1571.66 22.18 2
 2 2 -1 1538.23 25.85 1
 1 -2 -1 74.98 1.36 1
 -1 2 1 69.16 1.3 3
 1 2 -1 70 1.29 3
 -1 -2 1 70.3 1.24 1
 -1 2 1 72 1.26 2
 -1 -2 1 72.73 1.35 2
 0 2 1 202.85 3.19 3
 0 -2 1 201.85 3.21 1
 0 -2 -1 210.45 3.24 1
 0 2 -1 204.14 3.18 3
 0 2 1 209.97 3.25 2
 1 2 1 122.73 2.1 3
 -1 -2 -1 126.44 2.09 1
 -1 2 -1 127.61 2.37 3
 -1 2 -1 128.27 2.2 2
 2 -2 1 3277.78 50.09 1
 2 -2 1 3380.4 48.85 3
 2 2 1 3399.95 49 3
 -2 2 -1 3346.67 48.48 2
 -2 -2 -1 3411.56 49.6 2
 -2 -2 -1 3403 49.6 1
 -3 -2 -1 2519.33 35.38 2
 3 2 1 2484.57 34.87 3
 3 2 1 2414.93 35.86 1
 3 -2 1 2398.64 35.93 1
 -3 2 -1 2554.93 35.43 2
 3 -2 1 2486.67 35 3
 4 2 1 144.53 2.47 1
 4 -2 1 143.04 2.54 3
 4 -2 1 137.91 2.76 1
 4 2 1 144.99 2.72 3
 -5 2 -1 78.19 2.08 2
 5 2 1 72.83 1.84 3
 5 2 1 72.08 1.59 1
 -5 -2 -1 71.87 2.02 2
 5 -2 1 73.96 1.89 1
 5 -2 1 73.48 1.7 3
 6 -2 1 37.41 1.26 3
 6 2 1 37.09 1.18 1
 6 -2 1 36.11 1.41 1
 6 2 1 35.35 1.31 3
 -6 2 -1 35.71 1.5 2
 7 -2 1 45.36 1.68 1
 -7 -2 -1 45.31 1.82 2
 7 2 1 40.79 1.53 3
 7 2 1 43.74 1.41 1
 -7 2 -1 41.62 1.75 2
 7 -2 1 41.92 1.47 3
 8 -2 1 528.85 8.66 3
 8 2 1 531.51 8.51 1
 -8 -2 -1 518.08 9.41 2
 8 -2 1 524.62 8.93 1
 8 2 1 531.88 8.89 3
 -8 2 -1 514.15 9.36 2
 9 -2 1 3.02 0.8 1
 9 -2 1 4.13 0.78 3
 9 2 1 3.46 0.81 3
 -9 2 -1 2.37 0.85 2
 -9 -2 -1 2.14 0.85 2
 10 -2 1 10.96 1.14 1
 10 -2 1 13.9 1.13 3
 -10 2 -1 12.58 1.39 2
 -10 -2 -1 12.05 1.38 2
 10 2 1 12.85 1.13 3
 -11 -2 -1 10.34 1.39 2
 -11 2 -1 9.58 1.37 2
 11 2 1 8.55 1.15 3
 12 2 1 4.79 1.07 3
 -12 -2 -1 3.97 1.24 2
 -12 2 -1 3.97 1.13 2
 -13 -2 -1 2.01 1.14 2
 -13 2 -1 0.78 1 2
 -14 2 -1 10.77 1.7 2
 -14 -2 -1 10.96 1.7 2
 -14 -3 1 -0.05 1.04 2
 14 3 -1 -0.35 1.05 3
 -14 3 1 0.77 0.98 2
 -13 3 1 2 1.07 2
 13 3 -1 2.54 1.03 3
 -13 -3 1 2.78 1.12 2
 -12 3 1 -0.38 0.77 2
 12 3 -1 -0.86 0.84 3
 -12 -3 1 -0.15 0.84 2
 11 3 -1 3.68 0.98 3
 -11 -3 1 4.32 1.06 2
 -11 3 1 6.52 1.14 2
 11 -3 -1 7.18 1.07 3
 -10 3 1 0.31 0.71 2
 -10 -3 1 -0.51 0.62 2
 10 -3 -1 -0.41 0.62 3
 10 3 -1 0.4 0.68 3
 10 -3 -1 0.32 0.63 1
 9 -3 -1 8.22 0.98 3
 9 3 -1 9.73 1.07 3
 -9 3 1 9.19 1.14 2
 -9 -3 1 8.96 1.13 2
 9 -3 -1 9.39 1 1
 -8 3 1 38.79 1.78 2
 8 3 -1 40.87 1.75 3
 -8 -3 1 40.25 1.9 2
 8 -3 -1 38.54 1.61 3
 8 -3 -1 39.94 1.67 1
 7 3 -1 35.21 1.49 3
 7 -3 -1 33.89 1.39 3
 7 -3 -1 36.62 1.52 1
 -7 3 1 36.22 1.58 2
 7 3 -1 35.3 1.06 1
 -7 -3 1 36.6 1.62 2
 -6 3 1 87.66 2.35 2
 6 -3 -1 89.22 2.16 3
 6 3 -1 85.54 2.26 3
 -6 -3 1 86.7 2.38 2
 6 -3 -1 87.15 2.26 1
 6 3 -1 87.53 1.74 1
 5 -3 -1 376.85 6.1 3
 5 3 -1 377.13 5.74 1
 5 3 -1 376.07 6.27 3
 -5 3 1 381.22 6.4 2
 -5 -3 1 371.41 6.45 2
 5 -3 -1 373.03 6.34 1
 4 -3 -1 461.22 7.39 1
 4 -3 -1 460.87 7.12 3
 4 3 -1 456.21 7.25 3
 4 3 -1 458.73 6.89 1
 -4 3 1 461.22 7.33 2
 3 -3 -1 118.25 2.38 1
 3 3 -1 116.58 2.28 3
 -3 -3 1 119.38 2.38 2
 -3 3 1 118.2 2.3 2
 3 -3 -1 118 2.21 3
 -2 3 1 410.7 6.19 2
 -2 3 1 403.17 6.11 3
 -2 -3 1 415.78 6.29 2
 2 3 -1 390.24 6.15 3
 2 -3 -1 409.14 6.35 1
 -1 3 1 2286.62 32.83 2
 1 3 -1 2181.06 32.64 3
 1 3 -1 2273.28 32.81 2
 -1 -3 1 2232.61 33.95 1
 -1 3 1 2245.95 32.53 3
 0 -3 1 70.36 1.29 1
 0 3 1 67.12 1.23 2
 0 -3 -1 68.52 1.29 1
 0 3 -1 69.63 1.36 2
 0 3 -1 67.45 1.19 3
 -1 -3 -1 628.12 9.33 2
 -1 3 -1 631.55 9.41 2
 1 3 1 629.79 9.25 3
 1 -3 1 649.89 9.46 1
 -1 -3 -1 637.19 9.43 1
 -1 3 -1 628.53 9.61 3
 -2 3 -1 181.72 3.17 2
 -2 -3 -1 184.71 3.13 2
 2 3 1 178.8 3.05 3
 2 -3 1 179.1 2.81 3
 2 -3 1 179.37 3.13 1
 -2 -3 -1 178.28 2.88 1
 -3 3 -1 66.68 1.63 2
 3 3 1 65.09 1.51 3
 -3 -3 -1 63.42 1.58 2
 3 -3 1 63.72 1.59 1
 3 -3 1 65.32 1.27 3
 3 3 1 64.08 1.2 1
 4 -3 1 66.78 1.45 3
 4 3 1 69.27 1.68 3
 4 -3 1 67.02 1.74 1
 -4 3 -1 68.16 1.81 2
 4 3 1 67 1.32 1
 5 3 1 3.22 0.54 3
 5 -3 1 3.2 0.43 3
 -5 -3 -1 2.57 0.56 2
 5 3 1 2.6 0.37 1
 -5 3 -1 2.13 0.51 2
 5 -3 1 2.52 0.57 1
 6 -3 1 61.14 1.62 3
 -6 -3 -1 66.11 2.07 2
 6 -3 1 62.46 1.94 1
 6 3 1 61.09 1.5 1
 -6 3 -1 59.86 2 2
 6 3 1 59.62 1.8 3
 7 3 1 12.71 0.83 1
 7 -3 1 14.55 1.07 1
 -7 -3 -1 11.17 1.02 2
 -7 3 -1 11.92 1.03 2
 7 -3 1 12.38 0.83 3
 7 3 1 12.26 1 3
 -8 -3 -1 97.88 3.05 2
 8 -3 1 105.05 2.86 1
 8 3 1 102.3 2.76 3
 8 3 1 102.54 2.35 1
 8 -3 1 103.9 2.6 3
 -8 3 -1 102 3.08 2
 9 -3 1 120.79 3.22 1
 9 -3 1 116.76 3 3
 -9 -3 -1 119.67 3.59 2
 9 3 1 125.96 3.29 3
 -9 3 -1 121.67 3.59 2
 10 -3 1 41.53 1.79 3
 -10 -3 -1 39.8 2.13 2
 -10 3 -1 36.78 2.05 2
 10 -3 1 38.98 1.87 1
 10 3 1 40.57 1.95 3
 -11 3 -1 3.46 1.1 2
 -11 -3 -1 3.67 1.05 2
 11 3 1 2.1 0.82 3
 -12 3 -1 21.11 1.87 2
 -12 -3 -1 21.16 1.88 2
 12 3 1 20.38 1.68 3
 -13 3 -1 41.54 2.65 2
 13 3 1 42.17 2.38 3
 -13 -3 -1 33.42 2.43 2
 -14 3 -1 -1.34 0.97 2
 -14 -3 -1 1.18 1.09 2
 -14 4 1 -0.24 0.94 2
 -14 -4 1 -0.01 1.02 2
 14 4 -1 -0.59 0.99 3
 13 4 -1 5.78 1.3 3
 -13 -4 1 4.18 1.26 2
 -13 4 1 4.45 1.18 2
 12 4 -1 0.52 0.9 3
 -12 4 1 0.95 0.86 2
 -12 -4 1 0.47 0.86 2
 -11 4 1 8.65 1.22 2
 11 -4 -1 11.17 1.16 1
 -11 -4 1 11.79 1.4 2
 11 4 -1 9.16 1.21 3
 11 -4 -1 8.09 1.08 3
 10 -4 -1 1.33 0.71 3
 -10 -4 1 2.05 0.83 2
 10 4 -1 -0.07 0.69 3
 10 -4 -1 1.67 0.74 1
 -10 4 1 1.84 0.73 2
 -9 -4 1 74.87 2.73 2
 9 4 -1 77.68 2.56 3
 9 -4 -1 77.84 2.44 3
 -9 4 1 78.52 2.75 2
 9 -4 -1 77.7 2.49 1
 8 -4 -1 63.26 2.02 3
 8 -4 -1 64.45 2.16 1
 8 4 -1 61.24 2.13 3
 -8 -4 1 62.59 2.3 2
 -8 4 1 61.2 2.24 2
 7 4 -1 9.78 0.57 1
 -7 4 1 9.1 0.88 2
 -7 -4 1 9.02 0.92 2
 7 4 -1 9.29 0.89 3
 7 -4 -1 9.51 0.82 3
 7 -4 -1 9.48 0.9 1
 6 4 -1 1.67 0.53 3
 6 -4 -1 1.37 0.54 1
 -6 -4 1 1.65 0.55 2
 -6 4 1 1.8 0.53 2
 6 4 -1 2.34 0.29 1
 6 -4 -1 1.32 0.45 3
 5 -4 -1 19.98 0.91 3
 -5 -4 1 22.25 1.09 2
 5 4 -1 20.23 1.01 3
 5 -4 -1 20.62 1.1 1
 -5 4 1 20.22 1 2
 5 4 -1 19.85 0.53 1
 -4 -4 1 24.61 1.04 2
 4 4 -1 24.07 0.99 3
 4 -4 -1 26.14 1.11 1
 4 -4 -1 24.51 0.91 3
 -4 4 1 25.7 1 2
 -3 4 1 37.71 1.1 2
 -3 -4 1 37.13 1.16 2
 3 -4 -1 36.23 1.2 1
 3 -4 -1 36.25 1.03 3
 -2 -4 1 13.7 0.35 1
 -2 -4 1 12.07 0.64 2
 -2 4 1 14.66 0.6 3
 2 -4 -1 14.49 0.74 1
 2 4 -1 17.45 0.72 3
 -2 4 1 13.29 0.59 2
 1 4 -1 44.58 1.04 3
 -1 -4 1 47.59 0.94 1
 -1 4 1 45.9 1.01 2
 1 4 -1 46.36 1.13 2
 0 -4 1 387.38 5.94 1
 0 4 -1 387.41 5.77 3
 0 4 1 390.42 5.88 2
 0 -4 -1 398.5 5.97 1
 0 4 1 380.36 5.86 3
 0 4 -1 393 6 2
 1 4 1 93.54 1.8 3
 -1 4 -1 96.88 1.57 3
 -1 -4 -1 92.83 1.77 2
 1 -4 1 93.91 1.85 1
 -1 -4 -1 93.38 1.65 1
 -1 4 -1 92.92 1.86 2
 -2 -4 -1 323.01 4.96 1
 2 -4 1 325.21 5.27 1
 -2 4 -1 317.77 5.23 2
 2 4 1 323.6 5.12 3
 -2 4 -1 326.77 4.85 3
 -2 -4 -1 321.89 5.17 2
 3 -4 1 156.12 3 1
 -3 -4 -1 152.79 2.49 1
 -3 -4 -1 152.64 2.95 2
 3 -4 1 155.09 2.54 3
 3 4 1 151.59 2.85 3
 -4 -4 -1 16.51 0.88 2
 -4 4 -1 15.67 0.86 2
 4 -4 1 13.98 0.87 1
 4 4 1 15.89 0.82 3
 4 -4 1 15.63 0.65 3
 4 4 1 14.19 0.49 1
 5 -4 1 745.03 11.54 1
 5 -4 1 739.43 10.84 3
 -5 4 -1 712.73 11.52 2
 -5 -4 -1 720.73 11.51 2
 5 4 1 731.45 10.79 1
 5 4 1 729.72 11.22 3
 -6 4 -1 505.02 8.64 2
 6 4 1 514.66 7.75 1
 6 4 1 494.78 8.25 3
 6 -4 1 503.15 8.51 1
 -6 -4 -1 501.01 8.63 2
 6 -4 1 515.87 7.92 3
 -7 -4 -1 66.52 2.26 2
 7 -4 1 70.46 1.87 3
 7 -4 1 68.34 2.22 1
 -7 4 -1 65.09 2.27 2
 7 4 1 68.66 1.64 1
 7 4 1 67.61 2.09 3
 8 -4 1 116.03 3.13 1
 8 4 1 117.9 3.06 3
 -8 -4 -1 115.52 3.31 2
 8 -4 1 112.22 2.72 3
 -8 4 -1 115.65 3.3 2
 -9 -4 -1 174.2 4.49 2
 9 -4 1 174.74 4.14 1
 9 4 1 179.25 4.15 3
 9 -4 1 166.22 3.75 3
 -9 4 -1 177.85 4.52 2
 10 -4 1 0.48 0.74 1
 10 4 1 0.98 0.74 3
 -10 4 -1 0.58 0.78 2
 -10 -4 -1 1.28 0.82 2
 11 -4 1 72.55 2.65 1
 11 4 1 69.11 2.68 3
 -11 -4 -1 69.89 2.99 2
 -11 4 -1 65.67 2.94 2
 12 4 1 37.98 2.19 3
 -12 -4 -1 40.02 2.45 2
 -12 4 -1 38.45 2.38 2
 -13 -4 -1 13.08 1.71 2
 13 4 1 11.99 1.51 3
 -13 4 -1 11.09 1.66 2
 -14 -4 -1 12.43 1.8 2
 -14 4 -1 13.9 1.83 2
 -14 5 1 5.52 1.37 2
 -14 -5 1 6.34 1.48 2
 14 5 -1 8.13 1.5 3
 -13 5 1 3.37 1.15 2
 -13 -5 1 4.32 1.27 2
 13 5 -1 3.95 1.13 3
 -12 5 1 5.84 1.23 2
 -12 -5 1 7.26 1.27 2
 12 5 -1 5.28 1.18 3
 11 5 -1 13.29 1.37 3
 -11 -5 1 11.31 1.4 2
 -11 5 1 10.2 1.31 2
 11 -5 -1 11.87 1.24 1
 -10 5 1 23.7 1.63 2
 -10 -5 1 21.82 1.66 2
 10 -5 -1 22.51 1.49 3
 10 -5 -1 24.57 1.55 1
 10 5 -1 20.16 1.55 3
 -9 5 1 39.75 1.97 2
 9 -5 -1 38.69 1.85 1
 -9 -5 1 41.19 2.01 2
 9 5 -1 39.24 1.84 3
 9 -5 -1 40.79 1.76 3
 8 -5 -1 4.41 0.76 3
 8 -5 -1 6.46 0.93 1
 8 5 -1 6.51 0.91 3
 -8 5 1 6.32 0.92 2
 -8 -5 1 5.15 0.9 2
 7 -5 -1 21.29 1.14 3
 -7 5 1 22.52 1.32 2
 7 -5 -1 23.62 1.39 1
 7 5 -1 21.95 1.3 3
 -7 -5 1 21.55 1.34 2
 6 5 -1 6.08 0.69 3
 -6 5 1 6.35 0.7 2
 6 -5 -1 6.96 0.65 3
 -6 -5 1 6.29 0.75 2
 6 -5 -1 6.94 0.79 1
 -5 5 1 2.85 0.52 2
 5 -5 -1 0.99 0.38 3
 5 5 -1 0.33 0.43 3
 5 -5 -1 0.64 0.48 1
 -5 -5 1 1.22 0.47 2
 -4 5 1 61.09 1.64 2
 4 5 -1 58.27 1.63 3
 -4 -5 1 59.03 1.7 2
 4 -5 -1 59.68 1.49 3
 4 -5 -1 57.69 1.72 1
 3 5 -1 171.5 3.17 3
 -3 -5 1 169.5 3.25 2
 -3 5 1 167.1 3.12 2
 3 -5 -1 173.62 3.32 1
 -3 5 1 172.77 3.01 3
 -2 5 1 129.66 2.34 3
 2 -5 -1 129.11 2.59 1
 -2 -5 1 132.66 2.12 1
 2 5 -1 127.07 2.44 3
 -2 5 1 130.87 2.41 2
 -1 5 1 395.18 6.01 3
 -1 -5 1 396.83 6.02 1
 -1 5 1 395.8 6.07 2
 1 5 -1 401.26 6.21 2
 1 5 -1 390.74 6.02 3
 0 5 1 865.53 12.8 2
 0 -5 -1 898.22 12.95 1
 0 5 -1 878.14 12.94 2
 0 -5 1 869.54 12.94 1
 0 5 1 867.51 12.69 3
 0 5 -1 881.51 12.62 3
 1 5 1 670.14 10.05 3
 1 -5 1 686.98 10.32 1
 -1 5 -1 683.76 10.25 2
 -1 -5 -1 690.86 10.14 2
 -1 -5 -1 681.53 10.08 1
 -1 5 -1 677.9 9.87 3
 -2 -5 -1 559.57 8.38 1
 -2 5 -1 562.63 8.2 3
 2 -5 1 568.42 8.76 1
 -2 5 -1 561.24 8.67 2
 2 5 1 554.49 8.49 3
 -2 -5 -1 559.34 8.59 2
 -3 -5 -1 78.7 1.45 1
 -3 5 -1 83.5 1.54 3
 -3 5 -1 80.48 1.94 2
 -3 -5 -1 81.69 1.94 2
 4 5 1 118.26 2.55 3
 4 -5 1 121.81 2.72 1
 4 5 1 116.82 1.98 1
 -4 5 -1 120.7 2.69 2
 4 -5 1 117.48 2.18 3
 5 -5 1 221.57 3.78 3
 5 -5 1 230.11 4.43 1
 -5 5 -1 218.8 4.36 2
 -5 -5 -1 215.73 4.34 2
 5 5 1 219.29 4.18 3
 5 5 1 223.05 3.52 1
 -6 -5 -1 4.91 0.72 2
 6 5 1 5.28 0.68 3
 6 -5 1 5.28 0.78 1
 6 5 1 7.15 0.53 1
 6 -5 1 5.96 0.57 3
 -6 5 -1 6.27 0.76 2
 -7 -5 -1 70.05 2.34 2
 7 -5 1 68.66 1.85 3
 7 5 1 69.57 2.18 3
 7 -5 1 68.13 2.31 1
 -7 5 -1 71.34 2.34 2
 8 -5 1 39.83 1.89 1
 -8 -5 -1 35.4 1.82 2
 -8 5 -1 37.88 1.9 2
 8 -5 1 38.76 1.48 3
 8 5 1 39.74 1.76 3
 9 5 1 1.87 0.76 3
 9 -5 1 2.04 0.76 1
 9 -5 1 0.19 0.56 3
 -9 -5 -1 0.83 0.75 2
 -9 5 -1 0.18 0.66 2
 10 -5 1 110.5 3.31 1
 -10 5 -1 108.38 3.55 2
 -10 -5 -1 113.3 3.68 2
 10 5 1 106.87 3.25 3
 11 -5 1 1.03 0.85 1
 11 5 1 2.42 0.89 3
 -11 -5 -1 0.85 0.86 2
 -11 5 -1 2.52 0.96 2
 -12 5 -1 28.2 2.15 2
 12 5 1 22.27 1.79 3
 -12 -5 -1 26.8 2.09 2
 -13 -5 -1 38.28 2.53 2
 -13 5 -1 37.69 2.56 2
 13 5 1 38.26 2.35 3
 -14 -5 -1 1.27 1.19 2
 -14 5 -1 2.76 1.29 2
 14 6 -1 2.09 1.16 3
 -14 -6 1 0.66 1.13 2
 -14 6 1 1.2 1.16 2
 13 6 -1 -0.66 0.93 3
 -13 6 1 1.35 1.06 2
 -13 -6 1 0.71 0.93 2
 -12 6 1 18.49 1.78 2
 12 6 -1 18.38 1.63 3
 -12 -6 1 16.9 1.78 2
 11 -6 -1 -0.4 0.63 1
 -11 6 1 0.72 0.78 2
 -11 -6 1 1.79 0.95 2
 11 6 -1 -0.66 0.74 3
 10 -6 -1 112.04 3.27 1
 10 6 -1 105.73 3.27 3
 -10 -6 1 94.38 3.36 2
 -10 6 1 104.39 3.38 2
 10 -6 -1 110.01 3.03 3
 -9 -6 1 5.98 1.07 2
 9 -6 -1 9.33 1.08 1
 -9 6 1 6.32 1.01 2
 9 6 -1 7.12 1.04 3
 9 -6 -1 7.66 0.88 3
 -8 -6 1 3.59 0.84 2
 8 -6 -1 4.9 0.85 1
 -8 6 1 2.59 0.73 2
 8 -6 -1 2.83 0.64 3
 8 6 -1 2.45 0.77 3
 -7 6 1 647.79 10.7 2
 -7 -6 1 626.28 10.77 2
 7 -6 -1 639.03 10.14 3
 7 6 -1 633.72 10.5 3
 7 -6 -1 651.92 10.76 1
 -6 6 1 3.27 0.59 2
 6 6 -1 2.76 0.58 3
 -6 -6 1 1.98 0.58 2
 6 -6 -1 1.87 0.66 1
 6 -6 -1 2.16 0.5 3
 -5 6 1 55.99 1.56 3
 5 6 -1 60.1 1.8 3
 5 -6 -1 57.53 1.86 1
 -5 6 1 58.51 1.76 2
 4 6 -1 275.97 4.85 3
 4 -6 -1 277.33 5.04 1
 -4 6 1 274.67 4.6 3
 -4 -6 1 266.19 4.94 2
 -4 6 1 275.84 4.86 2
 -3 -6 1 107.88 2.38 2
 -3 6 1 108.58 2.15 3
 -3 6 1 108 2.28 2
 3 6 -1 108.97 2.31 3
 3 -6 -1 106.31 2.45 1
 -2 -6 1 22.41 0.62 1
 -2 6 1 21.59 0.8 2
 2 -6 -1 22.78 0.99 1
 2 6 -1 23.01 0.87 3
 -2 6 1 23 0.79 3
 1 -6 -1 2000.53 29.09 1
 -1 -6 1 1980.98 29.68 1
 -1 6 1 2012.37 28.43 3
 -1 6 1 2046.78 28.79 2
 1 6 -1 2022.61 28.44 3
 1 6 -1 2003.51 28.86 2
 0 6 -1 802.37 12.06 2
 0 6 1 803.86 11.91 2
 0 -6 -1 830.19 12.05 1
 0 6 -1 815.33 11.72 3
 0 -6 1 796.98 12.05 1
 0 6 1 801.46 11.81 3
 1 -6 1 55.96 1.46 1
 -1 6 -1 53.96 1.14 3
 -1 -6 -1 53.21 1.32 2
 -1 6 -1 55.94 1.44 2
 1 6 1 56.64 1.38 3
 -1 -6 -1 53.81 1.21 1
 -2 -6 -1 202.2 3.3 1
 2 6 1 209.63 3.64 3
 -2 6 -1 204.11 3.71 2
 -2 -6 -1 201.77 3.62 2
 2 -6 1 201.64 3.76 1
 -2 6 -1 207.46 3.23 3
 -3 6 -1 106.89 2.4 2
 -3 6 -1 104.21 1.9 3
 3 6 1 108.33 2.31 3
 3 -6 1 105.21 2.44 1
 -3 -6 -1 106.55 2.34 2
 -3 -6 -1 102.95 1.84 1
 -4 -6 -1 34.7 0.75 1
 4 -6 1 34.61 1.39 1
 -4 6 -1 33.41 1.29 2
 -4 6 -1 33.81 0.95 3
 -4 -6 -1 34.02 1.29 2
 4 6 1 34.68 1.3 3
 5 -6 1 6.12 0.51 3
 5 -6 1 6.34 0.82 1
 5 6 1 7.89 0.39 1
 -5 6 -1 6.6 0.72 2
 5 6 1 6.54 0.68 3
 -5 -6 -1 7.13 0.74 2
 -6 -6 -1 9.39 0.9 2
 6 -6 1 9.63 0.96 1
 6 -6 1 10.22 0.72 3
 -6 6 -1 11.86 0.98 2
 6 6 1 10.01 0.51 1
 6 6 1 10.19 0.89 3
 -7 -6 -1 0.32 0.56 2
 7 -6 1 -0.19 0.39 3
 7 -6 1 0.35 0.63 1
 7 6 1 0.57 0.54 3
 -7 6 -1 0.12 0.53 2
 -8 -6 -1 4.27 0.89 2
 -8 6 -1 4.2 0.86 2
 8 -6 1 5.68 0.74 3
 8 6 1 5.95 0.86 3
 8 -6 1 5.94 0.96 1
 -9 -6 -1 10.47 1.2 2
 9 6 1 15.32 1.23 3
 9 -6 1 12.14 1.24 1
 -9 6 -1 10.32 1.19 2
 10 6 1 -0.45 0.58 3
 -10 -6 -1 0.16 0.67 2
 10 -6 1 1.01 0.76 1
 -10 6 -1 -0.09 0.76 2
 11 -6 1 45.07 2.27 1
 11 6 1 51.19 2.32 3
 -11 -6 -1 47.22 2.49 2
 -11 6 -1 46.37 2.48 2
 -12 6 -1 9.9 1.46 2
 -12 -6 -1 12.03 1.56 2
 12 6 1 11.34 1.35 3
 -13 -6 -1 3.65 1.21 2
 -13 6 -1 2.87 1.16 2
 13 6 1 4.74 1.23 3
 -14 -6 -1 8.2 1.64 2
 -14 6 -1 4.59 1.39 2
 14 6 1 6.41 1.45 3
 -14 -7 1 1.54 1.19 2
 14 7 -1 2.63 1.14 3
 -14 7 1 -0.34 1.02 2
 -13 7 1 2.28 1.13 2
 13 7 -1 3.04 1.13 3
 -13 -7 1 2.6 1.15 2
 12 -7 -1 26.49 1.87 1
 -12 -7 1 21.93 1.93 2
 -12 7 1 23.14 1.87 2
 12 7 -1 25.32 1.93 3
 -11 -7 1 40.39 2.37 2
 11 -7 -1 38.67 2.08 1
 11 7 -1 37.61 2.15 3
 -11 7 1 44.01 2.33 2
 10 7 -1 0.2 0.75 3
 -10 -7 1 0.34 0.77 2
 10 -7 -1 0.15 0.69 1
 -10 7 1 0.67 0.71 2
 -9 -7 1 27.8 1.72 2
 9 -7 -1 28.2 1.63 1
 -9 7 1 28.39 1.65 2
 9 7 -1 27.45 1.63 3
 9 -7 -1 27.66 1.46 3
 -8 7 1 238.67 5.17 2
 8 -7 -1 237.09 4.66 3
 -8 -7 1 237.85 5.29 2
 8 7 -1 239.79 5.1 3
 8 -7 -1 241.14 5.17 1
 -7 -7 1 16.12 1.24 2
 7 -7 -1 17.07 1.29 1
 7 -7 -1 16.01 1.04 3
 7 7 -1 17.32 1.19 3
 -7 7 1 15.35 1.18 2
 6 -7 -1 100.74 2.75 1
 -6 7 1 97.7 2.6 2
 -6 -7 1 98.46 2.71 2
 -6 7 1 98.91 2.31 3
 6 7 -1 95.86 2.58 3
 5 7 -1 62.7 1.92 3
 -5 7 1 65.47 1.69 3
 -5 7 1 63.35 1.9 2
 5 -7 -1 65.73 2.05 1
 -5 -7 1 65.52 2 2
 4 -7 -1 613.54 9.95 1
 4 7 -1 611 9.65 3
 -4 7 1 617.72 9.69 2
 -4 7 1 620.47 9.35 3
 -4 -7 1 601.57 9.79 2
 -3 -7 1 128.73 2.76 2
 3 7 -1 129.63 2.68 3
 -3 7 1 129.14 2.64 2
 -3 7 1 129.38 2.48 3
 -3 -7 1 128.38 2.08 1
 3 -7 -1 122.3 2.8 1
 -2 -7 1 3.55 0.33 1
 -2 7 1 3.16 0.38 3
 2 7 -1 3.93 0.47 3
 -2 7 1 3.91 0.43 2
 -2 -7 1 3.57 0.45 2
 2 -7 -1 3.07 0.51 1
 1 7 -1 74.92 1.77 2
 -1 7 1 72.18 1.65 2
 -1 -7 1 76.9 1.61 1
 1 7 -1 72.46 1.65 3
 -1 7 1 74.89 1.63 3
 1 -7 -1 73.4 1.79 1
 0 7 -1 254.29 4.42 2
 0 -7 1 252.61 4.35 1
 0 7 1 255.42 4.28 2
 0 7 1 257.68 4.26 3
 0 7 -1 262.27 4.16 3
 0 -7 -1 263.66 4.35 1
 -1 7 -1 1222.13 17.59 3
 1 7 1 1232.96 17.86 3
 -1 -7 -1 1245.22 18 1
 -1 -7 -1 1238.71 18.02 2
 1 -7 1 1226.77 18.28 1
 -1 7 -1 1242.03 18.15 2
 1 7 1 1228.61 18 2
 2 7 1 49.56 1.4 3
 -2 7 -1 45.85 1.05 3
 -2 -7 -1 45.45 1.32 2
 -2 7 -1 46.25 1.39 2
 -2 -7 -1 45.69 1.06 1
 -3 7 -1 75.42 1.5 3
 -3 -7 -1 74.36 1.45 1
 3 -7 1 75.16 2.05 1
 -3 7 -1 74.93 1.96 2
 -3 -7 -1 76.34 1.92 2
 3 7 1 76.73 1.92 3
 -4 7 -1 129.69 2.94 2
 -4 -7 -1 128.03 2.15 1
 -4 7 -1 132.19 2.38 3
 4 7 1 128.19 2.83 3
 -4 -7 -1 129.41 2.92 2
 4 -7 1 127.64 3 1
 -5 -7 -1 45.15 1.64 2
 5 7 1 43.53 1.56 3
 5 -7 1 41.46 1.74 1
 5 7 1 43.61 0.86 1
 -5 7 -1 46.29 1.67 2
 -5 7 -1 44.04 1.21 3
 -6 7 -1 13.55 0.77 3
 6 7 1 14.41 1.04 3
 -6 7 -1 15.49 1.07 2
 -6 -7 -1 13.34 1.05 2
 6 -7 1 12.63 1.09 1
 -7 7 -1 244.07 5.28 2
 7 -7 1 258.46 5.35 1
 -7 -7 -1 245.25 5.29 2
 7 7 1 267.77 5.18 3
 7 -7 1 251.01 4.5 3
 8 7 1 31.44 1.68 3
 8 -7 1 31.02 1.78 1
 -8 7 -1 27.4 1.61 2
 -8 -7 -1 30.1 1.71 2
 8 -7 1 30.28 1.3 3
 -9 -7 -1 3.92 0.93 2
 9 -7 1 4.6 0.95 1
 -9 7 -1 5.39 0.96 2
 9 7 1 3.34 0.82 3
 10 -7 1 -0.07 0.79 1
 -10 7 -1 -0.07 0.67 2
 10 7 1 -0.05 0.72 3
 -10 -7 -1 0.03 0.72 2
 11 7 1 9.63 1.28 3
 11 -7 1 8.63 1.26 1
 -11 7 -1 9.84 1.35 2
 -11 -7 -1 11.13 1.44 2
 12 7 1 -0.68 0.85 3
 -12 -7 -1 1.12 0.97 2
 -12 7 -1 0.35 0.87 2
 12 -7 1 0.24 0.9 1
 -13 -7 -1 15.99 1.9 2
 13 7 1 14.16 1.64 3
 -13 7 -1 13.51 1.72 2
 -14 7 -1 14.14 1.9 2
 -14 -7 -1 14.23 1.93 2
 14 7 1 19.33 1.98 3
 14 8 -1 -0.77 1.02 3
 -14 -8 1 0.9 1.07 2
 -14 8 1 -0.41 0.91 2
 13 8 -1 2 1.07 3
 -13 -8 1 -1.33 0.82 2
 -13 8 1 1.83 1.14 2
 12 -8 -1 2.77 1.02 1
 12 8 -1 0.74 0.86 3
 -12 8 1 2.17 1.04 2
 -12 -8 1 1.56 0.95 2
 11 8 -1 0.33 0.86 3
 -11 -8 1 0.16 0.8 2
 11 -8 -1 -0.05 0.73 1
 -11 8 1 -0.12 0.72 2
 -10 -8 1 13.2 1.43 2
 10 -8 -1 16.7 1.45 1
 10 8 -1 13.23 1.36 3
 -10 8 1 15.78 1.45 2
 -9 8 1 -1.01 0.51 2
 9 8 -1 -0.01 0.64 3
 9 -8 -1 -0.07 0.7 1
 -9 -8 1 1.14 0.75 2
 -8 8 1 30.41 1.39 3
 8 8 -1 32.53 1.74 3
 8 -8 -1 28.92 1.75 1
 -8 -8 1 30.73 1.74 2
 -8 8 1 30.11 1.61 2
 -7 8 1 102.92 2.87 2
 7 8 -1 97.87 2.82 3
 -7 8 1 98.77 2.47 3
 7 -8 -1 101.82 2.97 1
 -7 -8 1 96.81 2.91 2
 6 -8 -1 35.42 1.72 1
 6 8 -1 36.84 1.55 3
 -6 8 1 33.31 1.49 2
 -6 8 1 32.93 1.26 3
 -5 8 1 68.13 2 2
 5 -8 -1 68.9 2.23 1
 -5 -8 1 69.33 2.12 2
 5 8 -1 65.79 2.01 3
 -5 8 1 69.59 1.79 3
 -4 -8 1 122.47 2.88 2
 -4 8 1 121.55 2.74 2
 4 -8 -1 123.62 2.96 1
 -4 8 1 121.07 2.5 3
 4 8 -1 124.14 2.81 3
 3 8 -1 121.9 2.63 3
 -3 8 1 119.97 2.58 2
 -3 8 1 118.61 2.4 3
 -3 -8 1 119.16 2.7 2
 -3 -8 1 121.5 2.02 1
 -2 8 1 73.19 1.77 2
 2 -8 -1 72.95 1.93 1
 -2 -8 1 72.37 1.48 1
 -2 8 1 71.15 1.65 3
 2 8 -1 71.01 1.78 3
 -2 -8 1 73.74 1.89 2
 1 8 -1 58.34 1.48 3
 -1 8 1 56.33 1.42 3
 -1 8 1 57.5 1.48 2
 -1 -8 1 57.73 1.4 1
 1 8 -1 58.64 1.59 2
 1 -8 -1 57.97 1.59 1
 0 8 -1 332.77 5.22 3
 0 8 -1 326.06 5.53 2
 0 8 1 333.49 5.39 2
 0 8 1 325.57 5.34 3
 0 -8 -1 330.59 5.42 1
 0 -8 1 321.87 5.44 1
 1 8 1 27.84 1 2
 -1 8 -1 28.79 1.08 2
 1 -8 1 30.02 1.15 1
 -1 -8 -1 29.09 0.93 1
 1 8 1 29.5 1.07 3
 -1 8 -1 30.72 0.9 3
 2 -8 1 7.16 0.69 1
 -2 -8 -1 6.68 0.44 1
 -2 8 -1 6.47 0.61 2
 -2 -8 -1 6.37 0.56 2
 2 8 1 6.89 0.6 3
 -2 8 -1 6.87 0.46 3
 -3 -8 -1 366.47 6.21 2
 -3 8 -1 362.36 6.27 2
 3 -8 1 359.83 6.39 1
 -3 8 -1 365.51 5.58 3
 3 8 1 363.36 6.12 3
 -3 -8 -1 362.5 5.63 1
 -4 8 -1 111.39 2.75 2
 4 -8 1 118.23 2.91 1
 -4 -8 -1 115.23 2.01 1
 4 8 1 114.68 2.68 3
 -4 -8 -1 117.22 2.75 2
 -4 8 -1 119.62 2.21 3
 5 8 1 1.03 0.52 3
 -5 -8 -1 0.76 0.48 2
 5 -8 1 -0.33 0.54 1
 -5 8 -1 0.77 0.36 3
 -5 8 -1 -0.16 0.38 2
 -6 -8 -1 23.97 1.35 2
 -6 8 -1 24.33 0.98 3
 -6 8 -1 25.11 1.34 2
 6 8 1 21.25 1.26 3
 6 -8 1 26.93 1.58 1
 7 -8 1 0.81 0.81 1
 -7 8 -1 0.64 0.62 2
 -7 8 -1 2.09 0.52 3
 7 8 1 0.15 0.59 3
 -7 -8 -1 0.83 0.64 2
 8 -8 1 35.51 1.93 1
 -8 8 -1 33.08 1.77 2
 8 8 1 33.32 1.7 3
 -8 -8 -1 32.92 1.8 2
 -9 8 -1 10.43 1.19 2
 9 -8 1 11.13 1.24 1
 9 8 1 11.52 1.16 3
 -9 -8 -1 8.51 1.21 2
 -10 8 -1 3.38 0.94 2
 10 8 1 3.23 0.89 3
 -10 -8 -1 2.85 0.94 2
 10 -8 1 1.01 0.86 1
 -11 -8 -1 16.01 1.68 2
 11 8 1 15.51 1.46 3
 -11 8 -1 15.26 1.62 2
 11 -8 1 17.04 1.53 1
 -12 -8 -1 2.28 1.03 2
 12 -8 1 0.94 0.98 1
 12 8 1 2.39 0.97 3
 -12 8 -1 2.33 1.01 2
 -13 -8 -1 10.58 1.61 2
 -13 8 -1 13.86 1.77 2
 13 8 1 11.18 1.48 3
 13 9 -1 -1.45 0.88 3
 -13 -9 1 1.3 1.06 2
 -13 9 1 0.7 1 2
 12 -9 -1 9.73 1.36 1
 12 9 -1 12.37 1.48 3
 -12 -9 1 9.24 1.46 2
 -12 9 1 10.74 1.5 2
 -11 -9 1 6.59 1.21 2
 11 9 -1 5.78 1.11 3
 -11 9 1 5.01 1.14 2
 11 -9 -1 5.97 1.13 1
 -10 -9 1 13.25 1.43 2
 10 9 -1 15.77 1.46 3
 -10 9 1 15.34 1.45 2
 10 -9 -1 17.19 1.51 1
 -9 -9 1 34.74 1.94 2
 9 -9 -1 33.97 1.97 1
 -9 9 1 31.68 1.81 2
 9 9 -1 37.13 1.97 3
 -8 9 1 -0.19 0.58 2
 -8 -9 1 0 0.64 2
 8 -9 -1 0.18 0.73 1
 8 9 -1 -0.43 0.59 3
 -8 9 1 0.15 0.56 3
 -7 9 1 6.56 0.75 3
 7 9 -1 4.74 0.87 3
 -7 -9 1 4.82 0.85 2
 7 -9 -1 6.16 0.95 1
 -7 9 1 6.07 0.84 2
 -6 -9 1 26.94 1.44 2
 -6 9 1 26.13 1.16 3
 6 9 -1 27.85 1.42 3
 -6 9 1 27.85 1.38 2
 6 -9 -1 26.79 1.55 1
 -5 9 1 38.72 1.53 2
 -5 -9 1 39.71 1.63 2
 5 -9 -1 37.46 1.7 1
 -5 9 1 41.05 1.34 3
 5 9 -1 38.65 1.55 3
 -4 -9 1 1.72 0.55 2
 4 9 -1 1.08 0.47 3
 -4 9 1 2.48 0.46 3
 -4 9 1 1.19 0.45 2
 4 -9 -1 1.58 0.6 1
 -3 9 1 569.5 8.64 3
 3 9 -1 554.41 8.9 3
 -3 -9 1 562.85 9.12 2
 -3 9 1 554.97 8.94 2
 3 -9 -1 552.58 9.26 1
 -3 -9 1 573.82 8.38 1
 -2 9 1 30.25 1.02 3
 -2 9 1 29.69 1.11 2
 2 9 -1 31.26 1.21 2
 -2 -9 1 28.63 0.9 1
 2 9 -1 31.18 1.17 3
 2 -9 -1 28.41 1.24 1
 -2 -9 1 30.49 1.21 2
 1 9 -1 43.67 1.31 3
 1 -9 -1 44.25 1.42 1
 1 9 -1 45.48 1.44 2
 -1 -9 1 45.02 1.27 1
 -1 9 1 44.13 1.32 2
 -1 9 1 44.01 1.28 3
 0 -9 -1 7.59 0.63 1
 0 9 -1 7.87 0.59 3
 0 -9 1 7.82 0.65 1
 0 9 -1 7.98 0.64 2
 0 9 1 7.87 0.61 2
 0 9 1 7.13 0.59 3
 1 -9 1 41 1.4 1
 -1 -9 -1 40.42 1.17 1
 -1 9 -1 42.23 1.14 3
 1 9 1 40.59 1.33 3
 -1 9 -1 39.47 1.35 2
 1 9 1 39.35 1.27 2
 2 -9 1 10.93 0.9 1
 -2 -9 -1 11.65 0.59 1
 -2 9 -1 12.44 0.79 2
 -2 9 -1 12.69 0.63 3
 2 9 1 12.57 0.81 3
 -2 -9 -1 12.49 0.78 2
 3 9 1 21.63 1.06 3
 3 -9 1 18.99 1.15 1
 -3 9 -1 17.32 1 2
 -3 9 -1 18.86 0.72 3
 -3 -9 -1 18.47 0.67 1
 -3 -9 -1 17.49 0.96 2
 -4 -9 -1 91.57 1.7 1
 4 9 1 93.9 2.39 3
 4 -9 1 92.06 2.59 1
 -4 9 -1 91.72 1.86 3
 -4 -9 -1 88.56 2.39 2
 -4 9 -1 89.49 2.41 2
 -5 9 -1 166.84 3.84 2
 -5 9 -1 182.44 3.17 3
 5 9 1 176.24 3.78 3
 5 -9 1 171.95 4.01 1
 -6 -9 -1 11.79 1.03 2
 -6 9 -1 10.29 0.74 3
 -6 9 -1 9.49 0.99 2
 6 -9 1 10.21 1.09 1
 6 9 1 9.42 0.98 3
 -7 9 -1 40.1 1.86 2
 7 -9 1 37.5 1.89 1
 7 9 1 38.93 1.76 3
 -7 -9 -1 36.88 1.8 2
 -8 -9 -1 180.03 4.5 2
 8 -9 1 185.71 4.54 1
 -8 9 -1 174.27 4.41 2
 8 9 1 178.32 4.28 3
 -9 -9 -1 2.23 0.9 2
 9 -9 1 1.13 0.89 1
 9 9 1 1.42 0.8 3
 -9 9 -1 3.03 0.91 2
 10 -9 1 31.03 2.02 1
 -10 9 -1 32.32 2.02 2
 -10 -9 -1 31.85 2 2
 10 9 1 31.41 1.94 3
 11 -9 1 50.26 2.55 1
 11 9 1 51.6 2.43 3
 -11 -9 -1 47.08 2.62 2
 -11 9 -1 47.77 2.57 2
 12 9 1 26.85 1.95 3
 -12 -9 -1 27.18 2.2 2
 12 -9 1 25.4 2.04 1
 -12 9 -1 27.45 2.1 2
 -13 -9 -1 1.08 1.02 2
 -13 9 -1 0.94 1.01 2
 13 9 1 1.43 1.07 3
 -13 -10 1 6.98 1.45 2
 13 -10 -1 6.39 1.31 1
 13 10 -1 3.64 1.2 3
 -13 10 1 4.74 1.3 2
 -12 10 1 1.6 1 2
 12 -10 -1 3.54 1.07 1
 12 10 -1 3.5 1.09 3
 -12 -10 1 1.38 1.03 2
 -11 -10 1 8.75 1.35 2
 -11 10 1 9.29 1.29 2
 11 10 -1 11.23 1.42 3
 11 -10 -1 10.62 1.38 1
 10 10 -1 11.25 1.33 3
 -10 10 1 9.26 1.2 2
 -10 -10 1 8.42 1.25 2
 10 -10 -1 7.93 1.19 1
 -9 10 1 5.97 1.02 2
 9 -10 -1 4.29 1.01 1
 9 10 -1 5.65 1.06 3
 -9 -10 1 7.32 1.16 2
 -8 -10 1 1.27 0.79 2
 8 10 -1 1.32 0.8 3
 8 -10 -1 0.14 0.71 1
 -8 10 1 0.66 0.65 2
 -7 -10 1 46.08 2.01 2
 -7 10 1 47.09 1.63 3
 -7 10 1 46.34 1.89 2
 7 10 -1 46.94 1.95 3
 7 -10 -1 49.68 2.14 1
 -6 -10 1 41.76 1.84 2
 -6 10 1 42.95 1.77 2
 6 -10 -1 48.37 2.07 1
 -6 10 1 45.78 1.52 3
 6 10 -1 45.79 1.85 3
 -5 10 1 95.18 2.25 3
 -5 10 1 97.93 2.59 2
 5 10 -1 92.03 2.58 3
 -5 -10 1 96.53 2.69 2
 5 -10 -1 98.78 2.84 1
 -4 10 1 -0.3 0.35 3
 -4 -10 1 -0.13 0.17 1
 4 10 -1 0.63 0.47 3
 4 -10 -1 0.6 0.62 1
 -4 -10 1 0.07 0.42 2
 -4 10 1 -0.07 0.34 2
 -3 -10 1 32.94 0.89 1
 -3 10 1 33.18 1.14 3
 3 10 -1 32.11 1.3 3
 -3 -10 1 32.88 1.36 2
 3 -10 -1 34.57 1.49 1
 -3 10 1 31.91 1.26 2
 2 -10 -1 7.07 0.73 1
 2 10 -1 5.81 0.64 2
 2 10 -1 7.69 0.69 3
 -2 10 1 9.12 0.7 2
 -2 10 1 7.83 0.63 3
 -2 -10 1 7.36 0.59 1
 1 10 -1 57.86 1.57 3
 -1 10 1 57.84 1.55 3
 -1 10 1 56.85 1.6 2
 1 -10 -1 56.79 1.7 1
 -1 -10 1 57.68 1.53 1
 1 10 -1 56.95 1.71 2
 0 10 1 79.04 1.96 2
 0 -10 -1 82.88 2.02 1
 0 10 1 83.84 2 3
 0 -10 1 80.96 2.01 1
 0 10 -1 82.1 2.11 2
 0 10 -1 83.29 1.91 3
 -1 -10 -1 227.91 4.05 1
 1 -10 1 228.6 4.38 1
 1 10 1 234.13 4.24 3
 1 10 1 234.95 4.26 2
 -1 10 -1 230.95 4.36 2
 -1 10 -1 227.63 3.92 3
 2 10 1 8.77 0.72 3
 -2 -10 -1 8.81 0.57 1
 -2 10 -1 9.69 0.78 2
 2 -10 1 10.88 0.88 1
 -2 10 -1 8.92 0.59 3
 -2 -10 -1 10.59 0.75 2
 3 10 1 224.95 4.36 3
 -3 10 -1 229.75 4.48 2
 3 -10 1 223.25 4.59 1
 -3 -10 -1 222.1 4.36 2
 -3 -10 -1 226.76 3.8 1
 -3 10 -1 229.2 3.79 3
 -4 10 -1 78.73 1.7 3
 4 -10 1 78.78 2.43 1
 -4 10 -1 76.84 2.25 2
 4 10 1 74.1 2.18 3
 -4 -10 -1 76.9 1.56 1
 -4 -10 -1 75.74 2.21 2
 -5 10 -1 95.88 2.66 2
 -5 -10 -1 87.01 2.57 2
 5 -10 1 93.92 2.83 1
 5 10 1 92.02 2.58 3
 -5 10 -1 92.05 1.97 3
 -6 10 -1 58.01 2.13 2
 6 -10 1 57.83 2.28 1
 -6 -10 -1 60.29 2.17 2
 -6 10 -1 59.19 1.57 3
 6 10 1 56.19 2.06 3
 -7 -10 -1 1.59 0.74 2
 -7 10 -1 2.3 0.73 2
 7 -10 1 2.47 0.89 1
 7 10 1 1.17 0.7 3
 -8 -10 -1 5.08 1 2
 8 10 1 6.71 0.97 3
 8 -10 1 6.33 1.07 1
 -8 10 -1 6.63 1 2
 -9 -10 -1 25.4 1.83 2
 9 10 1 28.37 1.8 3
 9 -10 1 24.66 1.77 1
 -9 10 -1 26.17 1.78 2
 -10 10 -1 2.03 0.9 2
 -10 -10 -1 4.08 1.03 2
 10 10 1 2.8 0.95 3
 10 -10 1 4.56 1.13 1
 11 10 1 23.92 1.91 3
 -11 -10 -1 28.37 2.05 2
 11 -10 1 24.73 2.01 1
 -11 10 -1 25.47 1.94 2
 12 10 1 26.37 2.09 3
 -12 10 -1 24.12 2.06 2
 -12 -10 -1 26.06 2.12 2
 12 -10 1 28.99 2.08 1
 13 -10 1 2.11 1.14 1
 -13 10 -1 2.2 1.14 2
 -13 -10 -1 1.87 1.13 2
 13 10 1 1.48 1.04 3
 -13 -11 1 2.28 1.14 2
 13 -11 -1 2.62 1.1 1
 13 11 -1 -1.3 0.95 3
 -13 11 1 1.32 1.11 2
 12 11 -1 -0.66 0.84 3
 -12 -11 1 -0.9 0.8 2
 -12 11 1 0.3 0.91 2
 12 -11 -1 0.9 0.9 1
 11 -11 -1 14.99 1.54 1
 -11 11 1 15.53 1.58 2
 11 11 -1 10.02 1.34 3
 -11 -11 1 10.56 1.48 2
 10 11 -1 0.91 0.87 3
 10 -11 -1 0.44 0.92 1
 -10 -11 1 -1.24 0.66 2
 -10 11 1 0.7 0.69 2
 -9 11 1 16.65 1.42 2
 9 -11 -1 12.99 1.37 1
 -9 -11 1 14.79 1.46 2
 9 11 -1 16.75 1.47 3
 8 -11 -1 88.01 3.07 1
 -8 -11 1 81.3 2.92 2
 8 11 -1 85.71 2.89 3
 -8 11 1 91.35 2.92 2
 7 11 -1 0.92 0.65 3
 -7 -11 1 1.15 0.75 2
 -7 11 1 -0.44 0.5 3
 7 -11 -1 0.37 0.72 1
 -7 11 1 0.33 0.61 2
 -6 11 1 151.02 3.67 2
 6 -11 -1 152.89 3.94 1
 6 11 -1 153.66 3.72 3
 -6 11 1 159.8 3.27 3
 -6 -11 1 152.66 3.86 2
 -5 11 1 10.37 0.8 3
 -5 11 1 12.87 0.95 2
 -5 -11 1 10.15 1.01 2
 5 11 -1 11.15 0.97 3
 5 -11 -1 11.01 1.1 1
 -4 -11 1 4.78 0.72 2
 4 -11 -1 5.2 0.84 1
 -4 -11 1 5.3 0.36 1
 -4 11 1 5.2 0.68 2
 4 11 -1 4.93 0.7 3
 -4 11 1 5.08 0.6 3
 -3 -11 1 14.7 0.98 2
 3 -11 -1 12.68 1.05 1
 -3 11 1 14.58 0.9 2
 3 11 -1 14.49 1.02 3
 -3 -11 1 12.54 0.63 1
 -3 11 1 14.63 0.81 3
 -2 11 1 176.99 3.53 2
 2 11 -1 167.3 3.62 2
 2 11 -1 167.92 3.45 3
 2 -11 -1 177.73 3.75 1
 -2 -11 1 175.72 3.17 1
 -2 11 1 169.48 3.29 3
 -1 -11 1 356.62 5.93 1
 1 11 -1 349.36 6.21 2
 1 11 -1 349.95 5.93 3
 1 -11 -1 348.69 6.2 1
 -1 11 1 357.53 5.91 3
 -1 11 1 364.78 6.1 2
 0 11 1 162.25 3.24 3
 0 -11 1 161.36 3.33 1
 0 -11 -1 162.46 3.29 1
 0 11 -1 163.01 3.14 3
 0 11 1 161.88 3.3 2
 0 11 -1 163.3 3.44 2
 -1 11 -1 355.07 5.63 3
 1 -11 1 336.65 6.07 1
 1 11 1 342.37 5.89 3
 1 11 1 345.29 5.96 2
 -1 -11 -1 342.05 5.75 1
 -1 11 -1 345.97 6.12 2
 -2 -11 -1 58.74 1.79 2
 -2 -11 -1 61.05 1.53 1
 2 -11 1 61.99 1.99 1
 -2 11 -1 60.85 1.5 3
 2 11 1 61.51 1.84 3
 -2 11 -1 57.47 1.84 2
 -3 -11 -1 31.23 0.97 1
 3 -11 1 27.73 1.47 1
 -3 11 -1 29.58 0.99 3
 3 11 1 27.11 1.34 3
 -3 -11 -1 26.4 1.26 2
 -3 11 -1 29.52 1.36 2
 4 -11 1 0.11 0.61 1
 -4 11 -1 0.17 0.45 2
 -4 11 -1 0.38 0.34 3
 4 11 1 -0.73 0.47 3
 -4 -11 -1 -0.04 0.25 1
 -4 -11 -1 0.26 0.47 2
 -5 -11 -1 78.13 2.44 2
 -5 11 -1 83.67 2.52 2
 -5 11 -1 82.02 1.85 3
 5 -11 1 78.91 2.63 1
 5 11 1 80.55 2.43 3
 -6 -11 -1 -0.12 0.55 2
 6 -11 1 0.18 0.75 1
 -6 11 -1 -0.36 0.48 2
 6 11 1 -0.98 0.52 3
 7 11 1 8.73 1.04 3
 7 -11 1 9.65 1.25 1
 -7 11 -1 9.09 1.05 2
 -7 -11 -1 8.43 1.05 2
 -8 11 -1 128.7 3.74 2
 -8 -11 -1 127.52 3.75 2
 8 -11 1 129.07 3.82 1
 8 11 1 125.68 3.58 3
 9 11 1 2.96 0.89 3
 9 -11 1 3.79 1.04 1
 -9 11 -1 3.91 0.99 2
 -9 -11 -1 3.29 0.96 2
 -10 -11 -1 1.97 0.97 2
 10 -11 1 0.98 0.93 1
 -10 11 -1 1.32 0.87 2
 10 11 1 0.28 0.85 3
 11 11 1 1.74 1.02 3
 -11 11 -1 0.14 0.82 2
 11 -11 1 -1.33 0.93 1
 -11 -11 -1 0.23 0.96 2
 12 11 1 7.61 1.37 3
 -12 -11 -1 6.42 1.38 2
 12 -11 1 5.88 1.35 1
 -12 11 -1 4.01 1.24 2
 13 -11 1 6.41 1.38 1
 -13 -11 -1 9.74 1.65 2
 13 11 1 5.98 1.32 3
 -13 11 -1 5.05 1.44 2
 13 -12 -1 12.56 1.65 1
 -13 -12 1 11.44 1.79 2
 -13 12 1 10.03 1.62 2
 13 12 -1 9.88 1.63 3
 12 12 -1 8.26 1.35 3
 12 -12 -1 8.28 1.42 1
 -12 12 1 5.85 1.33 2
 -12 -12 1 6.7 1.44 2
 11 12 -1 20.64 1.82 3
 11 -12 -1 22.13 1.9 1
 -11 12 1 21.5 1.74 2
 -11 -12 1 21 1.87 2
 -10 -12 1 -0.82 0.71 2
 10 12 -1 1.36 0.89 3
 10 -12 -1 -0.75 0.83 1
 -10 12 1 0.17 0.73 2
 -9 -12 1 14.38 1.44 2
 9 -12 -1 18.9 1.58 1
 9 12 -1 16.36 1.45 3
 -9 12 1 16.09 1.44 2
 8 -12 -1 38 2.07 1
 8 12 -1 36.75 1.95 3
 -8 12 1 36.56 1.9 2
 -8 -12 1 34.41 1.95 2
 7 12 -1 49.44 2.13 3
 -7 -12 1 46.08 2.12 2
 7 -12 -1 50.06 2.29 1
 -7 12 1 49.25 2.03 2
 -6 12 1 0.69 0.61 2
 6 12 -1 1.15 0.69 3
 6 -12 -1 1.5 0.79 1
 -6 12 1 1.02 0.52 3
 -6 -12 1 1.22 0.74 2
 5 -12 -1 9.23 1.06 1
 -5 12 1 9.16 0.77 3
 -5 12 1 9.86 0.9 2
 5 12 -1 7.36 0.93 3
 -5 -12 1 9.12 0.98 2
 4 -12 -1 0.89 0.66 1
 -4 -12 1 0.88 0.26 1
 4 12 -1 1.23 0.61 3
 -4 12 1 1.3 0.52 2
 -4 -12 1 0.68 0.56 2
 -4 12 1 1.39 0.49 3
 -3 -12 1 40.95 1.15 1
 3 -12 -1 41.74 1.74 1
 3 12 -1 38.61 1.57 3
 -3 -12 1 42.49 1.65 2
 -3 12 1 43.05 1.38 3
 -3 12 1 39.61 1.52 2
 2 -12 -1 3.37 0.67 1
 2 12 -1 2.99 0.61 2
 -2 12 1 2.63 0.5 3
 -2 -12 1 3.99 0.52 1
 -2 12 1 3 0.54 2
 2 12 -1 3.16 0.58 3
 1 -12 -1 86.99 2.34 1
 1 12 -1 91.55 2.44 2
 -1 -12 1 96.08 2.23 1
 -1 12 1 90.99 2.31 2
 1 12 -1 88.7 2.24 3
 -1 12 1 88.89 2.2 3
 0 12 1 468.92 7.71 2
 0 -12 1 464.5 7.72 1
 0 12 -1 467.67 7.87 2
 0 12 1 454.98 7.54 3
 0 12 -1 459.04 7.41 3
 0 -12 -1 460 7.68 1
 1 12 1 0.24 0.4 2
 -1 12 -1 0.25 0.38 3
 -1 12 -1 0.37 0.47 2
 1 12 1 0.01 0.49 3
 -1 -12 -1 -0.07 0.42 1
 1 -12 1 -0.74 0.53 1
 2 -12 1 256.84 5.12 1
 2 12 1 262.4 4.93 3
 -2 -12 -1 269.78 4.59 1
 -2 12 -1 267.87 4.5 3
 -2 12 -1 254.36 5.04 2
 -2 -12 -1 265.41 4.99 2
 3 12 1 25.98 1.3 3
 -3 -12 -1 24.99 1.29 2
 -3 -12 -1 26.6 0.96 1
 3 -12 1 24.74 1.45 1
 -3 12 -1 25.66 0.99 3
 -3 12 -1 26.18 1.31 2
 4 12 1 30.97 1.53 3
 4 -12 1 33.12 1.71 1
 -4 -12 -1 31.95 1 1
 -4 12 -1 31.91 1.08 3
 -4 12 -1 32.54 1.54 2
 -4 -12 -1 31.95 1.48 2
 5 -12 1 63.46 2.44 1
 -5 -12 -1 59.06 2.15 2
 -5 12 -1 64.74 2.25 2
 5 12 1 62.1 2.17 3
 -6 -12 -1 5.41 0.92 2
 6 -12 1 4.84 0.98 1
 6 12 1 4.76 0.84 3
 -6 12 -1 4.71 0.84 2
 7 -12 1 79.34 2.93 1
 7 12 1 77.31 2.67 3
 -7 12 -1 77.68 2.71 2
 -7 -12 -1 74.75 2.68 2
 8 12 1 2.68 0.88 3
 -8 12 -1 2.6 0.86 2
 8 -12 1 2.11 0.91 1
 -8 -12 -1 3.26 0.91 2
 9 12 1 23.12 1.76 3
 -9 12 -1 27.5 1.83 2
 -9 -12 -1 24.6 1.83 2
 9 -12 1 23.67 1.82 1
 10 12 1 0.09 0.76 3
 -10 12 -1 0.78 0.86 2
 -10 -12 -1 -1.67 0.64 2
 10 -12 1 1.73 1.01 1
 -11 12 -1 30.52 2.2 2
 11 12 1 26.34 2.04 3
 -11 -12 -1 30.69 2.25 2
 11 -12 1 29.76 2.21 1
 -12 -12 -1 19.06 1.95 2
 12 -12 1 24.48 2.08 1
 12 12 1 26.83 2.1 3
 -12 12 -1 20.66 1.92 2
 -13 12 -1 5.03 1.41 2
 13 12 1 6.98 1.43 3
 13 -12 1 7.65 1.38 1
 -13 -12 -1 6.08 1.5 2
 13 13 -1 1.78 1.23 3
 -13 -13 1 0.75 1.09 2
 13 -13 -1 3.4 1.18 1
 12 13 -1 16.29 1.79 3
 12 -13 -1 15.55 1.73 1
 -12 13 1 13.38 1.65 2
 -12 -13 1 15.48 1.79 2
 -11 -13 1 2.91 1.18 2
 11 -13 -1 3.03 1.09 1
 -11 13 1 3.65 1.11 2
 11 13 -1 3.15 1.09 3
 -10 13 1 4.27 1.05 2
 10 -13 -1 4.33 1.14 1
 -10 -13 1 4.23 1.11 2
 10 13 -1 4.49 1.12 3
 9 13 -1 2.21 0.93 3
 9 -13 -1 2.99 1.05 1
 -9 13 1 3.81 0.91 2
 -9 -13 1 2.28 0.9 2
 8 13 -1 36.69 2.03 3
 -8 13 1 35.19 1.84 2
 8 -13 -1 34.8 2.11 1
 -8 -13 1 32.28 1.93 2
 7 13 -1 20.15 1.54 3
 -7 -13 1 18.4 1.46 2
 7 -13 -1 20.22 1.6 1
 -7 13 1 20.67 1.47 2
 -6 -13 1 6.13 0.96 2
 6 -13 -1 6.69 1.06 1
 6 13 -1 8.09 0.99 3
 -6 13 1 7.63 0.97 2
 -5 13 1 31.35 1.5 2
 5 -13 -1 28.07 1.68 1
 -5 -13 1 29.7 1.6 2
 -5 13 1 29.89 1.27 3
 5 13 -1 31.47 1.6 3
 4 13 -1 -0.36 0.58 3
 -4 13 1 0.25 0.45 3
 -4 13 1 1.51 0.57 2
 4 -13 -1 0.96 0.73 1
 -4 -13 1 -0.21 0.49 2
 -3 13 1 0.07 0.44 3
 -3 13 1 -0.07 0.44 2
 -3 -13 1 -0.23 0.35 1
 3 -13 -1 0.09 0.62 1
 -3 -13 1 -0.14 0.46 2
 3 13 -1 -0.79 0.48 3
 2 -13 -1 21.81 1.37 1
 2 13 -1 22.25 1.23 2
 2 13 -1 24.29 1.25 3
 -2 13 1 21.99 1.08 3
 -2 -13 1 22.96 1.03 1
 -2 13 1 22.94 1.18 2
 1 -13 -1 59.27 1.98 1
 1 13 -1 59.62 1.95 2
 1 13 -1 59.06 1.81 3
 -1 13 1 61.88 1.89 2
 -1 -13 1 61 1.81 1
 -1 13 1 61.71 1.8 3
 0 -13 1 8.88 0.88 1
 0 13 -1 10.97 0.85 3
 0 13 1 9.56 0.79 2
 0 -13 -1 8.74 0.82 1
 0 13 1 8.77 0.82 3
 0 13 -1 9.07 0.83 2
 -1 -13 -1 115.45 2.62 1
 -1 13 -1 118.94 2.95 2
 1 13 1 112.72 2.74 3
 1 -13 1 119.01 2.96 1
 -1 13 -1 118.12 2.56 3
 1 13 1 113.71 2.78 2
 -2 -13 -1 92.15 2.13 1
 2 13 1 86.92 2.41 3
 2 -13 1 86.35 2.57 1
 -2 13 -1 92.73 2.1 3
 -2 13 -1 89.99 2.52 2
 -2 -13 -1 85.9 2.39 2
 3 13 1 80.86 2.39 3
 -3 13 -1 80.54 2.43 2
 -3 13 -1 78.76 1.87 3
 3 -13 1 77.13 2.52 1
 -3 -13 -1 81.29 1.88 1
 -3 -13 -1 76.52 2.31 2
 -4 13 -1 0.08 0.38 3
 4 -13 1 0.34 0.73 1
 -4 -13 -1 -0.01 0.56 2
 -4 13 -1 1.38 0.59 2
 4 13 1 0.15 0.58 3
 5 13 1 130.39 3.41 3
 -5 13 -1 128.5 3.42 2
 5 -13 1 131.89 3.66 1
 -5 -13 -1 132.7 3.48 2
 6 13 1 20.83 1.51 3
 -6 13 -1 18.93 1.34 2
 6 -13 1 17.97 1.49 1
 -6 -13 -1 21.6 1.49 2
 7 13 1 23.39 1.67 3
 -7 13 -1 23.8 1.64 2
 7 -13 1 26.02 1.79 1
 -7 -13 -1 26.66 1.66 2
 -8 13 -1 27.27 1.73 2
 8 13 1 30.31 1.9 3
 8 -13 1 25.81 1.86 1
 -8 -13 -1 25.62 1.74 2
 -9 13 -1 0.78 0.77 2
 9 13 1 -0.81 0.74 3
 9 -13 1 0.84 0.9 1
 -9 -13 -1 -0.28 0.7 2
 10 -13 1 9.39 1.46 1
 10 13 1 10.88 1.36 3
 -10 -13 -1 11.63 1.43 2
 -10 13 -1 11.77 1.47 2
 -11 13 -1 19.85 1.8 2
 11 13 1 19.25 1.82 3
 -11 -13 -1 21.53 1.91 2
 11 -13 1 21.25 1.88 1
 -12 13 -1 5.52 1.3 2
 12 13 1 8.04 1.45 3
 -12 -13 -1 8.79 1.52 2
 12 -13 1 8.27 1.52 1
 -12 14 1 8.7 1.43 2
 -12 -14 1 9.77 1.62 2
 12 14 -1 7.92 1.49 3
 12 -14 -1 6.85 1.41 1
 -11 14 1 0.38 0.95 2
 11 -14 -1 1.74 1.03 1
 11 14 -1 0.74 0.94 3
 -11 -14 1 1.98 1.06 2
 10 -14 -1 0.3 0.91 1
 -10 14 1 -0.5 0.82 2
 10 14 -1 0.32 0.9 3
 -10 -14 1 0.16 0.83 2
 -9 14 1 8.89 1.22 2
 -9 -14 1 7.74 1.25 2
 9 -14 -1 12.36 1.44 1
 9 14 -1 9.62 1.23 3
 8 -14 -1 3.97 1.04 1
 8 14 -1 4.77 0.99 3
 -8 14 1 4.9 0.98 2
 -8 -14 1 4.61 1.03 2
 7 -14 -1 45.33 2.26 1
 -7 14 1 48.4 2.14 2
 -7 -14 1 46.16 2.2 2
 7 14 -1 51.27 2.22 3
 6 -14 -1 8.64 1.16 1
 -6 14 1 9.54 1.06 2
 -6 -14 1 8.16 1.13 2
 6 14 -1 8.02 1.03 3
 5 14 -1 34.47 1.72 3
 5 -14 -1 42.72 2.04 1
 -5 14 1 39.79 1.48 3
 -5 -14 1 39.61 1.87 2
 -5 14 1 39.61 1.78 2
 -4 -14 1 2.09 0.71 2
 -4 14 1 3.23 0.61 3
 4 14 -1 2.26 0.7 3
 4 -14 -1 3.85 0.92 1
 -4 14 1 4.06 0.74 2
 -3 -14 1 23.11 0.95 1
 -3 14 1 23.26 1.13 3
 3 -14 -1 23.39 1.46 1
 -3 -14 1 22.06 1.33 2
 3 14 -1 27.18 1.44 3
 -3 14 1 23.73 1.29 2
 -2 14 1 305.05 5.76 2
 -2 -14 1 309.89 5.39 1
 2 14 -1 313.12 5.98 2
 2 14 -1 307.68 5.71 3
 2 -14 -1 315.31 6.04 1
 -2 14 1 312.95 5.52 3
 -1 -14 1 147.44 3.19 1
 -1 14 1 150.71 3.37 2
 1 -14 -1 144.31 3.4 1
 1 14 -1 146.96 3.49 2
 1 14 -1 146.87 3.24 3
 -1 14 1 144.55 3.18 3
 0 -14 -1 156.46 3.46 1
 0 14 1 153.6 3.38 3
 0 14 -1 158.72 3.3 3
 0 14 -1 151.56 3.57 2
 0 -14 1 160.36 3.51 1
 0 14 1 161.6 3.52 2
 1 -14 1 77.08 2.37 1
 -1 14 -1 77.74 2.04 3
 1 14 1 77.93 2.24 3
 -1 14 -1 76.45 2.33 2
 -1 -14 -1 78.96 2.11 1
 1 14 1 79.77 2.3 2
 2 -14 1 22.33 1.4 1
 -2 -14 -1 20.48 0.99 1
 -2 -14 -1 22.21 1.22 2
 2 14 1 20.1 1.29 3
 -2 14 -1 21.99 1.05 3
 -2 14 -1 20.59 1.27 2
 -3 -14 -1 9.72 0.96 2
 -3 -14 -1 9.04 0.69 1
 -3 14 -1 7.74 0.7 3
 3 14 1 8.31 0.91 3
 3 -14 1 6.76 0.99 1
 -3 14 -1 11.35 1.03 2
 -4 14 -1 16.39 0.92 3
 -4 -14 -1 17.63 1.24 2
 4 -14 1 17.78 1.45 1
 4 14 1 16.87 1.32 3
 -4 14 -1 16.34 1.21 2
 5 14 1 8.41 1.06 3
 -5 -14 -1 9.36 1.03 2
 5 -14 1 6.3 1.07 1
 -5 14 -1 9.21 1.06 2
 6 14 1 4.96 0.92 3
 -6 14 -1 8.19 1.03 2
 6 -14 1 7.49 1.14 1
 -6 -14 -1 7.5 1.02 2
 7 14 1 33.14 1.86 3
 -7 -14 -1 33.25 1.92 2
 -7 14 -1 37.79 1.98 2
 7 -14 1 35 2.04 1
 -8 14 -1 0.61 0.72 2
 -8 -14 -1 0.04 0.73 2
 8 14 1 0.37 0.74 3
 8 -14 1 -0.25 0.86 1
 -9 -14 -1 3.53 1.03 2
 -9 14 -1 4.19 1.08 2
 9 14 1 4.64 1.03 3
 9 -14 1 2.74 1.1 1
 10 -14 1 2.95 1.07 1
 -10 14 -1 3.4 1.08 2
 -10 -14 -1 3.65 1.14 2
 10 14 1 2.19 0.95 3
 11 -14 1 3.75 1.25 1
 11 14 1 1.59 1.01 3
 -11 -14 -1 2.28 1.09 2
 -11 14 -1 3.46 1.11 2
 12 -14 1 1.79 1.07 1
 -12 -14 -1 1.55 1.08 2
 -12 14 -1 2.34 1.18 2
 12 14 1 2.27 1.19 3
 12 -15 -1 2.12 1.17 1
 12 15 -1 2.36 1.15 3
 -12 -15 1 3.14 1.28 2
 -11 15 1 4.4 1.23 2
 11 15 -1 2.92 1.18 3
 11 -15 -1 4.17 1.19 1
 -11 -15 1 3.96 1.21 2
 10 15 -1 5.86 1.2 3
 10 -15 -1 4.67 1.18 1
 -10 15 1 9.14 1.32 2
 -10 -15 1 7.22 1.31 2
 -9 15 1 12.41 1.37 2
 9 -15 -1 8.52 1.34 1
 9 15 -1 11.48 1.4 3
 -9 -15 1 12.35 1.43 2
 -8 -15 1 11.7 1.38 2
 8 15 -1 12.77 1.32 3
 -8 15 1 11.29 1.27 2
 8 -15 -1 7.5 1.22 1
 7 -15 -1 18.9 1.64 1
 7 15 -1 25.15 1.67 3
 -7 15 1 21.33 1.54 2
 -7 -15 1 23.53 1.74 2
 -6 -15 1 227.79 5.35 2
 -6 15 1 240.2 5.22 2
 6 15 -1 221.53 5.13 3
 6 -15 -1 230.08 5.44 1
 5 15 -1 150.12 3.87 3
 -5 -15 1 154.41 4.04 2
 5 -15 -1 166 4.24 1
 -5 15 1 163.35 3.96 2
 4 15 -1 64.33 2.28 3
 -4 15 1 61.13 1.89 3
 -4 15 1 62.91 2.18 2
 -4 -15 1 64.78 2.34 2
 4 -15 -1 63.88 2.49 1
 -3 -15 1 382.4 6.21 1
 3 -15 -1 372.14 7.18 1
 -3 15 1 373.55 6.45 3
 -3 -15 1 364.88 7.05 2
 3 15 -1 372.45 6.84 3
 -3 15 1 374.09 6.89 2
 -2 -15 1 0.57 0.52 2
 2 15 -1 0 0.54 2
 2 15 -1 0.16 0.57 3
 -2 15 1 -0.29 0.51 3
 -2 15 1 0.65 0.49 2
 2 -15 -1 0.18 0.65 1
 -2 -15 1 -0.49 0.45 1
 -1 -15 1 415.43 7.15 1
 -1 15 1 420.28 7.14 3
 -1 15 1 428.04 7.39 2
 1 15 -1 410.17 7.54 2
 1 -15 -1 412.68 7.45 1
 1 15 -1 412.51 7.17 3
 0 -15 -1 130.04 3.1 1
 0 15 -1 132.11 3.3 2
 0 15 1 130.6 3.15 2
 0 15 -1 128.02 2.95 3
 0 15 1 128.56 3.04 3
 0 -15 1 132.91 3.18 1
 -1 15 -1 29.54 1.5 2
 -1 -15 -1 30.5 1.36 1
 1 15 1 28.68 1.39 2
 1 15 1 28.19 1.38 3
 1 -15 1 32.8 1.62 1
 -1 15 -1 30.87 1.28 3
 2 -15 1 148.97 3.73 1
 -2 15 -1 151.09 3.13 3
 -2 -15 -1 156.31 3.61 2
 -2 15 -1 152.81 3.71 2
 -2 -15 -1 148.78 3.16 1
 2 15 1 150.35 3.54 3
 3 15 1 1.4 0.7 3
 -3 -15 -1 1.02 0.44 1
 3 -15 1 1.49 0.83 1
 -3 -15 -1 1.8 0.69 2
 -3 15 -1 1.72 0.69 2
 -3 15 -1 1.77 0.52 3
 4 -15 1 191.89 4.65 1
 -4 -15 -1 197.66 4.5 2
 -4 15 -1 202.01 4.56 2
 4 15 1 188.71 4.39 3
 5 15 1 5.04 0.9 3
 5 -15 1 3.98 0.96 1
 -5 15 -1 5.44 0.91 2
 -5 -15 -1 4.77 0.92 2
 -6 -15 -1 20.52 1.49 2
 6 15 1 23.92 1.58 3
 6 -15 1 19.86 1.65 1
 -6 15 -1 21.69 1.5 2
 -7 15 -1 3.5 0.95 2
 -7 -15 -1 1.28 0.75 2
 7 15 1 3.8 0.92 3
 7 -15 1 1.22 0.89 1
 8 -15 1 2.68 1 1
 -8 -15 -1 3.88 1.05 2
 -8 15 -1 4.03 1.01 2
 8 15 1 3.57 1.01 3
 9 -15 1 1.53 0.96 1
 -9 -15 -1 0.95 0.92 2
 -9 15 -1 1.75 0.9 2
 9 15 1 2.56 0.94 3
 -10 15 -1 -0.03 0.86 2
 10 15 1 1.32 0.9 3
 -10 -15 -1 -0.04 0.87 2
 10 -15 1 0.32 0.96 1
 -11 -15 -1 2.02 1.09 2
 11 15 1 5.08 1.32 3
 11 -15 1 6.14 1.4 1
 -11 15 -1 4.85 1.28 2
 12 15 1 2.36 1.19 3
 12 -15 1 2.41 1.18 1
 -12 15 -1 1.64 1.18 2
 -12 -15 -1 0.58 1.05 2
 -12 -16 1 2.72 1.21 2
 12 16 -1 1.93 1.23 3
 12 -16 -1 2.2 1.2 1
 11 16 -1 0.11 0.93 3
 -11 -16 1 1.04 1.02 2
 11 -16 -1 1.75 1.15 1
 -10 16 1 0.92 0.93 2
 10 -16 -1 3.2 1.13 1
 10 16 -1 1.19 0.97 3
 -10 -16 1 1.74 1.02 2
 9 16 -1 0.91 0.92 3
 9 -16 -1 2.86 1.06 1
 -9 16 1 2.52 0.95 2
 -9 -16 1 4.22 1.07 2
 -8 -16 1 0.94 0.8 2
 8 -16 -1 0.5 0.83 1
 -8 16 1 -0.14 0.76 2
 8 16 -1 -0.82 0.68 3
 7 -16 -1 12.84 1.41 1
 -7 -16 1 12.72 1.37 2
 7 16 -1 12.85 1.37 3
 -7 16 1 12.16 1.26 2
 -6 16 1 4.05 0.94 2
 -6 -16 1 3.28 0.91 2
 6 16 -1 2.91 0.86 3
 6 -16 -1 3.26 1.01 1
 -5 -16 1 79.72 2.79 2
 5 -16 -1 83.56 2.95 1
 -5 16 1 80.12 2.68 2
 5 16 -1 77.2 2.66 3
 -4 -16 1 42.83 1.96 2
 -4 16 1 47.29 1.96 2
 -4 16 1 44.02 1.65 3
 4 16 -1 44.1 1.92 3
 4 -16 -1 45.57 2.12 1
 -3 16 1 11.13 0.97 3
 3 -16 -1 12.14 1.18 1
 -3 -16 1 10.24 1.08 2
 3 16 -1 12.21 1.11 3
 -3 16 1 10.73 1.05 2
 2 -16 -1 95.04 2.87 1
 -2 16 1 95.25 2.49 3
 -2 -16 1 90.54 2.35 1
 -2 -16 1 91.23 2.83 2
 2 16 -1 93.07 2.64 3
 2 16 -1 94.56 2.82 2
 -2 16 1 94.61 2.7 2
 1 16 -1 1.6 0.64 2
 -1 16 1 1.63 0.59 2
 1 -16 -1 2.98 0.76 1
 -1 16 1 2.22 0.68 3
 -1 -16 1 1.26 0.58 1
 0 -16 1 148.57 3.48 1
 0 -16 -1 144.31 3.43 1
 0 16 -1 148.48 3.65 2
 0 16 1 147.36 3.41 3
 0 16 1 143.76 3.48 2
 0 16 -1 146.71 3.29 3
 -1 16 -1 10.73 1.04 2
 1 16 1 10 0.95 2
 1 16 1 9.3 0.92 3
 1 -16 1 8.35 1.02 1
 -1 16 -1 9.16 0.84 3
 -1 -16 -1 6.61 0.77 1
 2 -16 1 70.66 2.5 1
 -2 -16 -1 71.22 2.01 1
 -2 16 -1 68.73 2.39 2
 -2 -16 -1 69.59 2.32 2
 -2 16 -1 72.67 2.01 3
 2 16 1 70.47 2.31 3
 3 -16 1 9.48 1.15 1
 -3 16 -1 10.42 1.1 2
 -3 16 -1 12.96 0.93 3
 3 16 1 10.44 1.05 3
 -3 -16 -1 13.42 1.12 2
 -4 16 -1 6.39 0.98 2
 -4 -16 -1 6.48 0.94 2
 4 -16 1 5.95 1.12 1
 4 16 1 5.97 0.94 3
 -5 16 -1 31.8 1.82 2
 5 16 1 34.81 1.84 3
 -5 -16 -1 36.37 1.9 2
 5 -16 1 40.09 2.17 1
 -6 -16 -1 61.17 2.51 2
 6 16 1 57.03 2.41 3
 6 -16 1 67.35 2.77 1
 -6 16 -1 66.81 2.62 2
 7 -16 1 1.73 0.98 1
 7 16 1 2.5 0.89 3
 -7 16 -1 2.72 0.89 2
 -7 -16 -1 1.65 0.88 2
 8 -16 1 -0.52 0.85 1
 -8 16 -1 0.05 0.71 2
 8 16 1 0.13 0.78 3
 -8 -16 -1 -0.27 0.74 2
 -9 16 -1 14.27 1.55 2
 9 -16 1 15.61 1.63 1
 9 16 1 16.29 1.62 3
 -9 -16 -1 13.8 1.55 2
 -10 16 -1 11.45 1.53 2
 10 16 1 9.39 1.4 3
 10 -16 1 10.25 1.58 1
 -10 -16 -1 9.29 1.44 2
 11 16 1 1.46 1.13 3
 11 -16 1 1.45 1.18 1
 -11 16 -1 1.16 0.96 2
 -11 -16 -1 -0.61 0.94 2
 11 17 -1 20.37 1.97 3
 11 -17 -1 19.47 1.94 1
 -11 -17 1 17.18 1.87 2
 10 -17 -1 3.22 1.21 1
 10 17 -1 4.61 1.21 3
 -10 -17 1 4.54 1.23 2
 -9 17 1 7.35 1.23 2
 9 17 -1 4.6 1.12 3
 -9 -17 1 5.85 1.22 2
 9 -17 -1 4.94 1.23 1
 8 -17 -1 0.89 0.9 1
 -8 17 1 1.68 0.89 2
 8 17 -1 0.32 0.75 3
 -8 -17 1 0.28 0.84 2
 7 17 -1 4.75 1.06 3
 -7 -17 1 4.56 1.04 2
 -7 17 1 4.45 0.99 2
 7 -17 -1 4.06 1.04 1
 -6 17 1 36.25 1.9 2
 6 17 -1 30.01 1.81 3
 -6 -17 1 35.48 1.96 2
 6 -17 -1 35.23 2.04 1
 5 -17 -1 -0.58 0.76 1
 -5 17 1 -0.54 0.56 2
 5 17 -1 0.43 0.76 3
 -5 -17 1 0.32 0.67 2
 4 17 -1 32.34 1.69 3
 4 -17 -1 32.06 1.85 1
 -4 -17 1 31.77 1.76 2
 -4 17 1 32.01 1.68 2
 -3 17 1 10.66 0.93 3
 3 -17 -1 9.79 1.11 1
 3 17 -1 9.25 0.99 3
 -3 -17 1 9.87 1.09 2
 -3 17 1 10.48 1.05 2
 -2 -17 1 0.33 0.54 1
 -2 17 1 1.21 0.63 3
 2 17 -1 2.03 0.69 3
 -2 17 1 0.8 0.61 2
 -2 -17 1 1.75 0.67 2
 2 -17 -1 1.74 0.77 1
 -1 -17 1 37.63 1.57 1
 1 17 -1 34.2 1.59 3
 1 17 -1 35.31 1.77 2
 -1 17 1 34.42 1.63 2
 -1 17 1 34.05 1.57 3
 1 -17 -1 34.11 1.71 1
 0 17 -1 111.91 3.15 2
 0 17 1 106.46 2.98 2
 0 17 -1 109.72 2.8 3
 0 -17 -1 106.67 2.89 1
 0 -17 1 110.5 2.97 1
 0 17 1 112.04 2.94 3
 -1 -17 -1 1.9 0.64 2
 1 17 1 1.67 0.67 2
 1 17 1 0.65 0.6 3
 1 -17 1 1.69 0.73 1
 -1 17 -1 0.86 0.55 3
 -1 17 -1 0.39 0.63 2
 -1 -17 -1 1.13 0.55 1
 -2 17 -1 10.47 1.11 2
 -2 17 -1 10 0.89 3
 -2 -17 -1 10.96 0.88 1
 2 17 1 10.66 1.11 3
 -2 -17 -1 10.78 1.06 2
 2 -17 1 9.63 1.1 1
 3 -17 1 56.81 2.36 1
 -3 -17 -1 59.5 2.26 2
 -3 17 -1 53.74 2.19 2
 3 17 1 59.48 2.24 3
 4 17 1 29.17 1.73 3
 4 -17 1 25.42 1.82 1
 -4 -17 -1 28.73 1.7 2
 -4 17 -1 28.92 1.68 2
 5 -17 1 95.75 3.29 1
 -5 -17 -1 98.88 3.16 2
 -5 17 -1 99.13 3.16 2
 5 17 1 91.6 3.02 3
 6 -17 1 19.9 1.73 1
 -6 17 -1 19.07 1.59 2
 -6 -17 -1 20 1.55 2
 6 17 1 20.56 1.55 3
 7 17 1 39.65 2.2 3
 -7 17 -1 40.14 2.13 2
 7 -17 1 38.93 2.27 1
 -7 -17 -1 40.65 2.23 2
 -8 -17 -1 41.56 2.29 2
 8 17 1 43.46 2.29 3
 8 -17 1 41.65 2.42 1
 -8 17 -1 43.06 2.27 2
 9 -17 1 1.79 1.08 1
 9 17 1 3.21 1.1 3
 -9 17 -1 0.08 0.87 2
 -9 -17 -1 1.35 0.94 2
 -10 17 -1 52.87 2.78 2
 10 17 1 51.43 2.78 3
 10 -17 1 49.87 2.8 1
 -10 -17 -1 52.88 2.83 2
 -11 -17 -1 36.07 2.59 2
 -11 17 -1 32.54 2.38 2
 11 17 1 34.85 2.48 3
 11 -17 1 37.9 2.67 1
 -11 -18 1 5.12 1.47 2
 11 18 -1 5.77 1.38 3
 11 -18 -1 4.72 1.32 1
 10 18 -1 21.33 1.97 3
 10 -18 -1 21.64 2 1
 -10 -18 1 22.73 2.08 2
 9 -18 -1 0.53 0.98 1
 -9 -18 1 0.71 0.87 2
 9 18 -1 1.05 1.01 3
 8 -18 -1 3.02 1.09 1
 -8 -18 1 2.52 0.98 2
 -8 18 1 3.63 1.04 2
 8 18 -1 2.54 1.03 3
 -7 18 1 2.19 0.89 2
 -7 -18 1 -0.7 0.72 2
 7 18 -1 1.04 0.88 3
 7 -18 -1 0.69 0.84 1
 6 -18 -1 10.91 1.36 1
 6 18 -1 11.63 1.33 3
 -6 18 1 10.76 1.23 2
 -6 -18 1 11.92 1.33 2
 5 -18 -1 3.13 1 1
 5 18 -1 2.48 0.9 3
 -5 18 1 3.58 0.89 2
 -5 -18 1 1.94 0.83 2
 -4 18 1 7.54 1.02 2
 4 -18 -1 7.32 1.12 1
 4 18 -1 7.83 1.03 3
 -4 -18 1 6.88 1.06 2
 3 -18 -1 77.79 2.77 1
 -3 18 1 77.74 2.32 3
 -3 -18 1 75.97 2.68 2
 3 18 -1 74.95 2.56 3
 -3 18 1 80.76 2.62 2
 -2 18 1 68.62 2.21 3
 2 18 -1 68.33 2.37 3
 -2 18 1 73.78 2.48 2
 2 -18 -1 69.96 2.56 1
 -2 -18 1 71.35 2.11 1
 -2 -18 1 76.44 2.64 2
 -1 -18 1 6.82 0.87 1
 1 18 -1 7.3 0.92 3
 -1 18 1 7.49 0.9 2
 -1 18 1 8.41 0.92 3
 1 18 -1 6.72 0.95 2
 1 -18 -1 6.79 0.96 1
 0 -18 -1 4.79 0.76 1
 0 -18 1 5.85 0.9 1
 0 18 -1 6.64 0.95 2
 0 18 -1 5.55 0.8 3
 0 18 1 6.29 0.89 2
 0 18 1 4.75 0.84 3
 1 -18 1 -0.33 0.71 1
 -1 -18 -1 0.23 0.51 1
 -1 18 -1 0.54 0.65 2
 1 18 1 0.35 0.66 3
 -1 -18 -1 -0.68 0.52 2
 -1 18 -1 -0.09 0.58 3
 -2 -18 -1 20.9 1.37 2
 -2 -18 -1 18.66 1.11 1
 2 18 1 18.02 1.4 3
 -2 18 -1 20.97 1.48 2
 -2 18 -1 19.77 1.22 3
 2 -18 1 19.97 1.57 1
 3 18 1 129.44 3.55 3
 -3 -18 -1 130.57 3.57 2
 3 -18 1 133.2 3.82 1
 -3 18 -1 134.93 3.7 2
 -4 18 -1 162.29 4.25 2
 -4 -18 -1 161.35 4.2 2
 4 -18 1 159.5 4.4 1
 4 18 1 158.79 4.14 3
 -5 18 -1 10.4 1.26 2
 5 -18 1 8.16 1.22 1
 -5 -18 -1 7.42 1.11 2
 5 18 1 6.38 1.11 3
 6 -18 1 40.56 2.29 1
 -6 18 -1 41.47 2.13 2
 6 18 1 41.72 2.12 3
 -6 -18 -1 38.19 2.08 2
 -7 18 -1 31.72 1.98 2
 7 -18 1 35.32 2.21 1
 -7 -18 -1 30.23 1.98 2
 7 18 1 32.05 1.99 3
 -8 18 -1 15.09 1.59 2
 -8 -18 -1 15.18 1.62 2
 8 -18 1 16.23 1.68 1
 8 18 1 16.92 1.63 3
 -9 -18 -1 41.18 2.43 2
 9 -18 1 38.5 2.55 1
 9 18 1 45.59 2.53 3
 -9 18 -1 43.68 2.5 2
 -10 -18 -1 11.14 1.58 2
 10 -18 1 9.07 1.54 1
 -10 18 -1 9.02 1.5 2
 10 18 1 8.92 1.52 3
 -11 18 -1 5.23 1.37 2
 11 18 1 4.33 1.41 3
 11 -18 1 5.65 1.48 1
 -11 -18 -1 7.42 1.5 2
 -10 -19 1 -0.12 0.94 2
 10 -19 -1 0.14 0.94 1
 10 19 -1 0.18 1.05 3
 9 -19 -1 11.33 1.54 1
 -9 -19 1 9.62 1.51 2
 9 19 -1 9.66 1.42 3
 8 -19 -1 43.34 2.51 1
 8 19 -1 37.53 2.23 3
 -8 -19 1 38.82 2.39 2
 7 19 -1 2.11 0.92 3
 -7 -19 1 0.77 0.99 2
 -7 19 1 1.72 1.02 2
 7 -19 -1 1.28 0.99 1
 6 19 -1 6.48 1.14 3
 6 -19 -1 5.76 1.15 1
 -6 -19 1 5.96 1.14 2
 -6 19 1 6.56 1.11 2
 -5 -19 1 0.73 0.76 2
 5 -19 -1 0.09 0.85 1
 -5 19 1 1 0.77 2
 5 19 -1 0.5 0.81 3
 4 19 -1 34.01 1.87 3
 4 -19 -1 33.65 2.04 1
 -4 -19 1 34.38 1.93 2
 -4 19 1 37.16 1.91 2
 3 -19 -1 8.24 1.13 1
 3 19 -1 10.43 1.08 3
 -3 19 1 10.26 1.13 2
 -3 -19 1 11.1 1.19 2
 -2 -19 1 1.65 0.74 2
 2 -19 -1 2.22 0.79 1
 -2 19 1 0.31 0.58 2
 -2 19 1 0.94 0.67 3
 1 -19 -1 2.3 0.73 1
 1 19 -1 2.25 0.74 2
 -1 19 1 -0.77 0.62 3
 -1 -19 1 0.66 0.58 1
 -1 19 1 1.28 0.69 2
 1 19 -1 1.56 0.68 3
 0 19 -1 24.89 1.59 2
 0 -19 1 22.24 1.43 1
 0 19 1 24.33 1.5 2
 0 -19 -1 22.28 1.34 1
 0 19 1 22.65 1.45 3
 0 19 -1 25.44 1.45 3
 1 -19 1 10.68 1.17 1
 -1 -19 -1 10.21 1.1 2
 -1 19 -1 10.09 1.12 2
 1 19 1 13.55 1.19 3
 -1 -19 -1 11.42 1 1
 -1 19 -1 11.13 1.03 3
 -2 19 -1 66.65 2.53 2
 -2 -19 -1 62.05 2.35 2
 2 19 1 63.16 2.35 3
 2 -19 1 61.9 2.46 1
 3 -19 1 1.21 0.85 1
 -3 19 -1 0.28 0.73 2
 -3 -19 -1 2.03 0.81 2
 3 19 1 2.05 0.86 3
 -4 19 -1 37.57 1.97 2
 4 19 1 37.09 1.94 3
 -4 -19 -1 36.93 1.98 2
 4 -19 1 33.14 2.1 1
 5 -19 1 0.7 0.85 1
 -5 -19 -1 -0.45 0.74 2
 -5 19 -1 -0.07 0.75 2
 5 19 1 1.14 0.79 3
 -6 -19 -1 1.57 0.84 2
 -6 19 -1 0.7 0.9 2
 6 19 1 -0.37 0.73 3
 6 -19 1 0.08 0.9 1
 7 -19 1 43.89 2.5 1
 -7 19 -1 40.5 2.31 2
 -7 -19 -1 42.53 2.31 2
 7 19 1 37.29 2.18 3
 -8 -19 -1 2.84 1.08 2
 -8 19 -1 3.56 1.12 2
 8 -19 1 3.57 1.14 1
 8 19 1 2.71 1.02 3
 9 19 1 3.74 1.18 3
 -9 -19 -1 3.65 1.18 2
 9 -19 1 3.21 1.17 1
 -9 19 -1 2.41 1.09 2
 -10 -19 -1 5.09 1.33 2
 -10 19 -1 4.59 1.35 2
 10 19 1 5.25 1.36 3
 10 -19 1 2.13 1.22 1
 10 -20 -1 6.31 1.47 1
 10 20 -1 5.23 1.39 3
 -10 -20 1 5.71 1.39 2
 9 20 -1 19.71 1.82 3
 -9 -20 1 15.01 1.71 2
 9 -20 -1 18.34 1.88 1
 8 -20 -1 0.99 0.97 1
 -8 -20 1 -0.72 0.76 2
 8 20 -1 0.8 1 3
 7 20 -1 136.39 4.21 3
 -7 -20 1 136.92 4.35 2
 7 -20 -1 136.78 4.46 1
 6 20 -1 12.57 1.41 3
 -6 20 1 11.54 1.4 2
 -6 -20 1 11.02 1.39 2
 6 -20 -1 6.97 1.24 1
 5 20 -1 44.97 2.22 3
 -5 20 1 45.37 2.23 2
 -5 -20 1 44.59 2.28 2
 5 -20 -1 43.69 2.4 1
 -4 20 1 77.24 2.75 2
 -4 -20 1 70.03 2.78 2
 4 -20 -1 75.87 2.97 1
 4 20 -1 72.03 2.72 3
 3 20 -1 6.65 1.03 3
 -3 -20 1 7.31 1.1 2
 -3 20 1 5.69 1 2
 3 -20 -1 7.19 1.16 1
 -2 -20 1 58.77 2.45 2
 2 -20 -1 57.16 2.37 1
 2 20 -1 62.34 2.35 3
 -2 20 1 63.15 2.4 2
 -2 20 1 58.57 2.14 3
 1 20 -1 69.12 2.61 2
 -1 -20 1 68.87 2.32 1
 -1 20 1 68.42 2.5 2
 1 20 -1 64.98 2.33 3
 -1 20 1 69.69 2.36 3
 1 -20 -1 69.02 2.51 1
 0 -20 -1 34.28 1.71 1
 0 20 1 33.53 1.73 3
 0 20 -1 34.33 1.67 3
 0 20 1 31.73 1.75 2
 0 -20 1 34.55 1.75 1
 0 20 -1 34.5 1.85 2
 1 20 1 72.07 2.53 3
 -1 20 -1 65.67 2.22 3
 1 -20 1 71.91 2.58 1
 -1 -20 -1 74.79 2.62 2
 -1 20 -1 66.54 2.58 2
 -1 -20 -1 67.47 2.29 1
 -2 20 -1 14.98 1.35 2
 -2 -20 -1 16.86 1.32 2
 2 20 1 14.26 1.3 3
 2 -20 1 13.84 1.37 1
 3 20 1 17.84 1.45 3
 -3 -20 -1 17.39 1.41 2
 3 -20 1 15.19 1.46 1
 -3 20 -1 15.55 1.4 2
 4 -20 1 4.76 1.05 1
 -4 -20 -1 3.41 0.94 2
 -4 20 -1 3.37 0.99 2
 4 20 1 3.81 0.99 3
 5 20 1 39.96 2.13 3
 5 -20 1 42.56 2.32 1
 -5 20 -1 44.6 2.22 2
 -5 -20 -1 36.14 2.11 2
 -6 -20 -1 33.62 2.06 2
 6 -20 1 36.68 2.27 1
 -6 20 -1 40.25 2.28 2
 6 20 1 34.85 2.12 3
 7 -20 1 -0.42 0.94 1
 -7 -20 -1 -0.46 0.8 2
 -7 20 -1 -0.9 0.84 2
 7 20 1 0.89 0.94 3
 8 -20 1 15.92 1.75 1
 -8 -20 -1 20.44 1.86 2
 8 20 1 14.72 1.59 3
 -8 20 -1 17.68 1.76 2
 -9 20 -1 0.91 1 2
 -9 -20 -1 0.3 0.9 2
 9 -20 1 0.23 1.01 1
 9 20 1 0.8 1.01 3
 10 -20 1 -0.62 0.92 1
 -10 -20 -1 0.82 1.05 2
 10 20 1 1.55 1.09 3
 9 21 -1 5.31 1.33 3
 9 -21 -1 4.82 1.35 1
 -9 -21 1 3.54 1.23 2
 -8 -21 1 -0.46 0.89 2
 8 -21 -1 0.62 0.94 1
 8 21 -1 -0.5 0.89 3
 -7 -21 1 0.34 0.9 2
 7 21 -1 0.17 0.85 3
 7 -21 -1 -0.9 0.82 1
 6 21 -1 59.77 2.67 3
 6 -21 -1 57.99 2.83 1
 -6 -21 1 59.98 2.77 2
 5 21 -1 15.51 1.46 3
 -5 21 1 15.71 1.5 2
 -5 -21 1 14.64 1.56 2
 5 -21 -1 15.58 1.63 1
 4 -21 -1 0.62 0.81 1
 -4 -21 1 2.4 0.96 2
 -4 21 1 1.12 0.82 2
 4 21 -1 2.18 0.88 3
 -3 -21 1 15.51 1.44 2
 -3 21 1 15.38 1.42 2
 3 21 -1 17.59 1.46 3
 3 -21 -1 16.65 1.47 1
 2 -21 -1 1.26 0.82 1
 -2 -21 1 1.57 0.84 2
 2 21 -1 1.59 0.74 3
 -2 21 1 1.99 0.82 2
 -1 21 1 13.29 1.28 2
 -1 21 1 12.21 1.19 3
 1 21 -1 14.89 1.27 3
 1 -21 -1 14.86 1.31 1
 1 21 -1 13.88 1.38 2
 0 21 -1 0.33 0.67 3
 0 21 1 0.9 0.68 2
 0 -21 1 -0.01 0.68 1
 0 21 -1 -0.16 0.64 2
 0 21 1 1.81 0.81 3
 0 -21 -1 0.96 0.67 1
 -1 21 -1 38.52 2.07 2
 -1 -21 -1 43.17 2.05 2
 1 -21 1 41.35 2.06 1
 1 21 1 40.32 1.98 3
 -2 21 -1 -0.61 0.76 2
 -2 -21 -1 1.17 0.8 2
 2 -21 1 1.38 0.8 1
 -3 21 -1 45.9 2.27 2
 3 -21 1 41.94 2.26 1
 -3 -21 -1 39.91 2.09 2
 3 21 1 38.92 2.07 3
 4 -21 1 27.96 1.94 1
 -4 -21 -1 26.76 1.78 2
 4 21 1 25.94 1.75 3
 -4 21 -1 28.29 1.9 2
 -5 21 -1 5.87 1.21 2
 5 -21 1 6.91 1.31 1
 -5 -21 -1 7.48 1.19 2
 5 21 1 8.07 1.26 3
 6 21 1 7.8 1.33 3
 -6 -21 -1 5.78 1.19 2
 -6 21 -1 6.09 1.26 2
 6 -21 1 7.71 1.36 1
 -7 -21 -1 7.6 1.33 2
 -7 21 -1 7.58 1.37 2
 7 21 1 5.84 1.25 3
 7 -21 1 5.55 1.27 1
 8 -21 1 1.18 1.05 1
 8 21 1 1.31 0.98 3
 -8 -21 -1 1.02 0.96 2
 -8 21 -1 -0.21 0.87 2
 -9 -21 -1 0 0.88 2
 9 21 1 1.47 1 3
 9 -21 1 0.79 1.01 1
 9 22 -1 5.76 1.4 3
 -9 -22 1 7.17 1.44 2
 9 -22 -1 7.58 1.5 1
 8 -22 -1 1.18 1.06 1
 8 22 -1 1.26 1.04 3
 -8 -22 1 -0.65 0.9 2
 -7 -22 1 0.38 0.98 2
 7 -22 -1 0.23 0.91 1
 7 22 -1 -0.83 0.88 3
 6 22 -1 2.88 1.07 3
 6 -22 -1 1.94 1.02 1
 -6 -22 1 2.08 1.02 2
 -5 -22 1 1.01 0.91 2
 5 22 -1 1.43 0.85 3
 5 -22 -1 2.15 1.01 1
 4 22 -1 3.82 1.03 3
 -4 22 1 3.79 1.04 2
 -4 -22 1 2.65 0.99 2
 4 -22 -1 4.47 1.12 1
 3 -22 -1 3.06 1.01 1
 -3 -22 1 1.79 0.86 2
 3 22 -1 1.92 0.88 3
 -3 22 1 1.46 0.89 2
 2 -22 -1 3.6 0.94 1
 -2 -22 1 5.27 1.09 2
 2 22 -1 4.23 0.96 3
 -2 22 1 6.27 1.03 2
 -1 -22 1 20.17 1.63 2
 1 -22 -1 20.31 1.54 1
 1 22 -1 17.07 1.38 3
 1 22 -1 21.46 1.68 2
 -1 22 1 17.82 1.44 2
 -1 22 1 20.65 1.51 3
 0 22 -1 3.29 0.99 2
 0 22 1 3.78 0.93 3
 0 -22 -1 3.12 0.82 1
 0 -22 1 4.63 0.91 1
 0 22 1 3.71 0.96 2
 -1 -22 -1 21.7 1.54 2
 1 22 1 21.97 1.61 3
 -1 22 -1 22.84 1.63 2
 1 -22 1 23.36 1.62 1
 2 22 1 61.69 2.55 3
 2 -22 1 68.67 2.76 1
 -2 22 -1 62.14 2.66 2
 -2 -22 -1 57.78 2.47 2
 3 22 1 45.45 2.21 3
 -3 22 -1 41.19 2.29 2
 -3 -22 -1 41.36 2.22 2
 3 -22 1 42.99 2.29 1
 -4 -22 -1 6.52 1.2 2
 4 -22 1 6.57 1.22 1
 -4 22 -1 6.38 1.17 2
 4 22 1 7.87 1.19 3
 -5 -22 -1 0.49 0.88 2
 -5 22 -1 -0.01 0.86 2
 5 -22 1 -0.92 0.92 1
 5 22 1 -0.32 0.91 3
 6 22 1 5.88 1.25 3
 -6 -22 -1 4.02 1.19 2
 -6 22 -1 4.06 1.13 2
 6 -22 1 3.53 1.23 1
 7 22 1 8.43 1.43 3
 -7 -22 -1 10.15 1.49 2
 7 -22 1 9.63 1.55 1
 -7 22 -1 17.27 1.74 2
 8 -22 1 1.41 1.07 1
 -8 -22 -1 2.22 1.08 2
 8 22 1 0.93 1.1 3
 8 23 -1 0.94 1 3
 8 -23 -1 3.95 1.27 1
 -8 -23 1 3.11 1.19 2
 7 23 -1 0.36 0.87 3
 7 -23 -1 0.11 0.9 1
 -7 -23 1 -0.26 0.94 2
 -6 -23 1 10.63 1.5 2
 6 23 -1 11.13 1.49 3
 6 -23 -1 11.38 1.54 1
 5 23 -1 26.89 1.89 3
 5 -23 -1 27.28 2.06 1
 -5 -23 1 28.14 2.09 2
 -4 -23 1 3.27 1.03 2
 4 23 -1 3.72 1.07 3
 4 -23 -1 7.53 1.25 1
 -3 -23 1 8.7 1.32 2
 3 -23 -1 8.95 1.27 1
 3 23 -1 9.85 1.24 3
 -2 23 1 1.88 0.89 2
 2 23 -1 0.77 0.79 3
 2 -23 -1 0.22 0.8 1
 -2 -23 1 1.53 0.95 2
 1 23 -1 15.94 1.37 3
 1 -23 -1 16.65 1.44 1
 -1 -23 1 14.81 1.5 2
 -1 23 1 13.21 1.41 2
 0 23 -1 11.14 1.38 2
 0 -23 -1 11.9 1.31 2
 0 23 1 13.63 1.33 3
 -1 23 -1 0.26 0.81 2
 -1 -23 -1 0.44 0.78 2
 1 23 1 0.62 0.84 3
 1 -23 1 0.02 0.76 1
 2 23 1 1.72 0.9 3
 -2 23 -1 0.24 0.77 2
 2 -23 1 0.32 0.83 1
 -2 -23 -1 -0.44 0.75 2
 3 -23 1 63.61 2.82 1
 3 23 1 62.09 2.7 3
 -3 -23 -1 65.74 2.77 2
 -3 23 -1 61.12 2.78 2
 4 23 1 9.68 1.31 3
 4 -23 1 7.5 1.32 1
 -4 23 -1 9.14 1.4 2
 -4 -23 -1 10.52 1.36 2
 5 23 1 27.96 2.03 3
 -5 23 -1 24.99 1.98 2
 -5 -23 -1 25.84 1.97 2
 5 -23 1 24.72 2.07 1
 6 -23 1 14.55 1.69 1
 -6 -23 -1 13.75 1.59 2
 -6 23 -1 16.19 1.73 2
 6 23 1 15.27 1.66 3
 7 -23 1 2.67 1.18 1
 7 23 1 2.17 1.1 3
 -7 -23 -1 1.88 0.99 2
 -8 -23 -1 8.8 1.49 2
 8 23 1 6.16 1.36 3
 8 -23 1 7.43 1.56 1
 7 -24 -1 -0.36 0.91 1
 -7 -24 1 0.09 0.96 2
 7 24 -1 0.73 0.92 3
 -6 -24 1 10.47 1.57 2
 6 24 -1 7.76 1.39 3
 6 -24 -1 11.73 1.59 1
 5 24 -1 5.14 1.2 3
 -5 -24 1 4.5 1.24 2
 5 -24 -1 5.88 1.35 1
 4 24 -1 0.23 0.83 3
 4 -24 -1 0.58 0.92 1
 -4 -24 1 -0.96 0.81 2
 -3 -24 1 11.88 1.5 2
 3 24 -1 10.94 1.26 3
 3 -24 -1 9.33 1.36 1
 2 -24 -1 -0.78 0.69 1
 -2 -24 1 2.18 0.93 2
 2 24 -1 0.31 0.79 3
 1 -24 -1 32.17 1.92 1
 -1 24 1 30.5 1.97 2
 -1 -24 1 32.14 2.06 2
 0 24 -1 0.77 0.86 2
 0 -24 -1 1.57 0.86 2
 1 -24 1 0.58 0.82 1
 1 24 1 0.87 0.88 3
 -1 -24 -1 0.29 0.79 2
 -1 24 -1 2.83 1.01 2
 2 -24 1 1.53 0.92 1
 -2 24 -1 -0.33 0.8 2
 2 24 1 1.38 0.94 3
 -2 -24 -1 -0.21 0.82 2
 -3 24 -1 0.23 0.84 2
 -3 -24 -1 1.84 0.91 2
 3 -24 1 1.68 1.01 1
 3 24 1 0.55 0.93 3
 4 -24 1 21.17 1.89 1
 4 24 1 23.09 1.81 3
 -4 -24 -1 21.15 1.82 2
 -4 24 -1 24.58 1.97 2
 -5 -24 -1 7.22 1.32 2
 5 -24 1 10.73 1.6 1
 5 24 1 7.81 1.29 3
 6 -24 1 -0.67 0.87 1
 -6 -24 -1 -0.17 0.88 2
 6 24 1 0.33 0.97 3
 -7 -24 -1 0.03 1.01 2
 7 -24 1 1.35 1.1 1
 7 24 1 4.49 1.31 3
 6 25 -1 1.31 1.01 3
 6 -25 -1 2.42 1.18 1
 -6 -25 1 3.49 1.22 2
 5 25 -1 14.75 1.63 3
 -5 -25 1 10.6 1.53 2
 5 -25 -1 11.99 1.58 1
 4 25 -1 7.95 1.31 3
 -4 -25 1 10.02 1.51 2
 4 -25 -1 8.21 1.34 1
 3 25 -1 43.73 2.35 3
 -3 -25 1 43.4 2.51 2
 3 -25 -1 45.56 2.52 1
 -2 -25 1 0.68 0.9 2
 2 -25 -1 1.64 0.9 1
 -1 -25 1 10.09 1.38 2
 0 25 -1 13.55 1.57 2
 -1 -25 -1 0.7 0.79 2
 -1 25 -1 1.44 1.01 2
 1 25 1 1.39 0.98 3
 -2 -25 -1 1.03 0.85 2
 -2 25 -1 -0.88 0.83 2
 2 25 1 3.75 1.07 3
 2 -25 1 2.22 0.98 1
 3 25 1 4.54 1.16 3
 3 -25 1 3.54 1.08 1
 -3 25 -1 4.47 1.22 2
 -3 -25 -1 5.2 1.23 2
 -4 -25 -1 -1.32 0.72 2
 4 25 1 2.1 1.07 3
 4 -25 1 1.81 1.11 1
 5 25 1 7.27 1.32 3
 5 -25 1 8.81 1.55 1
 -5 -25 -1 7.94 1.43 2
 6 25 1 8.94 1.46 3
 -6 -25 -1 8.32 1.48 2
 6 -25 1 10.2 1.58 1
 5 -26 -1 1.56 1.09 1
 5 26 -1 1.91 1.11 3
 -5 -26 1 0.92 1.03 2
 4 26 -1 9.2 1.38 3
 -4 -26 1 10.68 1.58 2
 4 -26 -1 12.35 1.62 1
 -3 -26 1 2.7 1.16 2
 3 -26 -1 3.15 1.05 1
 -2 -26 1 9.96 1.47 2
 2 -26 -1 9 1.29 1
 -1 -26 1 10.07 1.39 2
 0 -26 1 18.31 1.71 2
 -1 26 -1 -0.59 0.87 2
 -2 26 -1 24.68 2.02 2
 2 26 1 23.5 1.9 3
 2 -26 1 26.64 1.99 1
 3 26 1 2.06 1.07 3
 -3 -26 -1 1.42 1.08 2
 3 -26 1 3.36 1.16 1
 -4 -26 -1 2.04 1.13 2
 4 26 1 2.62 1.12 3
 4 -26 1 3.86 1.22 1
 5 -26 1 1.83 1.14 1
 -5 -26 -1 1.32 1.15 2
 5 26 1 1.06 1.09 3
 -3 -27 1 13.85 1.74 2
 3 -27 -1 18.17 1.72 1
 -2 -27 1 4.38 1.19 2
 -1 -27 1 2.85 1.18 2
 0 -27 1 4.38 1.21 2
 3 27 1 -0.98 0.93 3
 3 -27 1 0.53 0.97 1
 -14 0 2 5.84 1.42 2
 -13 0 2 -0.89 0.82 2
 13 0 -2 0.3 0.92 3
 -12 0 2 72.05 3.15 2
 12 0 -2 79.82 3.01 3
 11 0 -2 190.26 4.75 3
 -11 0 2 197.85 5.14 2
 -10 0 2 24.31 1.65 2
 10 0 -2 24.04 1.55 3
 9 0 -2 191.01 3.86 1
 -9 0 2 190.63 4.57 2
 9 0 -2 188.75 4.27 3
 -8 0 2 742.03 12.19 2
 8 0 -2 730.45 11.79 3
 8 0 -2 722.4 11.42 1
 7 0 -2 468.42 7.61 1
 7 0 -2 477.21 7.93 3
 -7 0 2 464.81 8.16 2
 6 0 -2 926.29 13.98 1
 -6 0 2 934 14.39 2
 6 0 -2 935.42 14.11 3
 5 0 -2 489.15 7.64 1
 5 0 -2 492.87 7.81 3
 -5 0 2 491.53 7.95 2
 4 0 -2 649.26 9.87 1
 -4 0 2 670.15 10.08 2
 4 0 -2 652.26 9.93 3
 3 0 -2 410.46 6.39 3
 3 0 -2 412.86 6.31 1
 -3 0 2 414.34 6.41 2
 -2 0 2 157.47 2.6 2
 2 0 -2 154.7 2.56 1
 1 0 -2 2037.05 30.73 3
 -1 0 2 2133.85 31.33 2
 1 0 -2 2139.16 31.47 1
 0 0 -2 135.91 2.31 1
 0 0 -2 136.5 2.24 2
 0 0 2 136.29 2.22 3
 -1 0 -2 470.06 6.94 2
 1 0 2 458.95 6.81 3
 -1 0 -2 460.33 6.98 1
 -2 0 -2 1761.27 24.89 2
 2 0 2 1718.63 24.66 3
 2 0 2 1720.65 24.99 1
 3 0 2 42.7 1.1 1
 3 0 2 43.42 1.06 3
 -3 0 -2 42.61 1.27 2
 4 0 2 1202.44 17.03 3
 4 0 2 1161.95 17.34 1
 5 0 2 138.92 2.69 3
 5 0 2 135.39 2.72 1
 -6 0 -2 2.95 0.62 2
 6 0 2 3.95 0.54 3
 6 0 2 4.95 0.61 1
 7 0 2 55.98 1.76 3
 7 0 2 58.91 1.8 1
 -7 0 -2 55.02 2.06 2
 -8 0 -2 30.48 1.71 2
 8 0 2 31.83 1.43 3
 8 0 2 30.11 1.47 1
 -9 0 -2 150.46 4.41 2
 9 0 2 184.11 3.96 3
 9 0 2 184.96 3.95 1
 10 0 2 0.78 0.71 3
 -10 0 -2 1.22 0.81 2
 11 0 2 2.29 0.83 3
 -11 0 -2 0.58 0.8 2
 -12 0 -2 -1 0.81 2
 -13 0 -2 68.07 3.34 2
 -14 0 -2 -0.02 0.93 2
 -14 -1 2 0.88 1.1 2
 -14 1 2 0.52 1.04 2
 -13 1 2 -0.06 0.84 2
 -13 -1 2 1.74 1.05 2
 13 1 -2 -1.29 0.87 3
 -12 1 2 8.51 1.32 2
 12 -1 -2 10.16 1.32 3
 12 1 -2 7.45 1.25 3
 -12 -1 2 9.19 1.36 2
 -11 1 2 11.18 1.38 2
 -11 -1 2 13.35 1.45 2
 11 -1 -2 12.59 1.3 3
 11 1 -2 13.92 1.32 3
 10 -1 -2 45.34 2.01 3
 -10 1 2 45.09 2.14 2
 10 1 -2 45.08 2.05 3
 -10 -1 2 45.19 2.16 2
 -9 -1 2 2.87 0.83 2
 9 -1 -2 3.16 0.65 1
 9 1 -2 1.92 0.78 3
 -9 1 2 1.62 0.76 2
 9 -1 -2 2.71 0.81 3
 8 -1 -2 22.17 1.31 3
 8 -1 -2 23.77 1.23 1
 8 1 -2 24.54 1.42 3
 8 1 -2 21.54 1.08 1
 -8 -1 2 24.63 1.47 2
 -8 1 2 26.29 1.53 2
 7 -1 -2 160.88 3.48 3
 7 -1 -2 158.66 3.27 1
 7 1 -2 162.4 3.09 1
 -7 1 2 163.16 3.66 2
 7 1 -2 161.03 3.53 3
 -7 -1 2 156 3.64 2
 -6 -1 2 6.72 0.72 2
 6 1 -2 7.34 0.55 1
 6 -1 -2 7.19 0.72 3
 6 -1 -2 8.14 0.67 1
 -6 1 2 7.61 0.78 2
 6 1 -2 6.27 0.67 3
 5 1 -2 701.42 10.7 3
 -5 -1 2 698.47 10.88 2
 -5 1 2 697.88 10.84 2
 5 -1 -2 701.24 10.67 3
 5 1 -2 701.17 10.46 1
 5 -1 -2 685.67 10.65 1
 -4 1 2 356.1 5.67 2
 4 1 -2 347.12 5.36 1
 4 -1 -2 341.96 5.58 3
 -4 -1 2 347.33 5.7 2
 4 1 -2 335.14 5.59 3
 4 -1 -2 338.47 5.53 1
 3 -1 -2 0.76 0.29 3
 3 -1 -2 0.69 0.26 1
 -3 1 2 0.52 0.25 2
 3 1 -2 1.09 0.29 3
 -3 -1 2 1.21 0.31 2
 3 1 -2 0.48 0.21 1
 2 1 -2 540.38 8 1
 2 -1 -2 532.6 8.02 1
 2 -1 -2 537.63 7.97 3
 -2 -1 2 542.98 8 2
 2 1 -2 524.03 7.93 3
 -2 1 2 538.21 7.94 2
 1 -1 -2 546.49 7.9 3
 1 1 -2 535.42 8.03 1
 1 1 -2 551.65 7.93 2
 1 -1 -2 532.62 7.98 1
 -1 1 2 530.1 8.34 2
 1 1 -2 517.15 7.82 3
 0 1 -2 272.79 4.27 1
 0 1 -2 277.13 4.19 3
 0 1 -2 271.4 4.22 2
 0 -1 -2 277.9 4.29 1
 0 1 2 274.91 4.18 3
 0 -1 -2 276.45 4.44 2
 -1 1 -2 714.65 10.4 2
 1 -1 2 698.57 10.7 3
 1 1 2 709.67 10.21 3
 -1 -1 -2 705.05 10.46 1
 -1 -1 -2 705.51 10.35 2
 2 1 2 82.38 1.56 3
 -2 -1 -2 84.46 1.59 1
 2 -1 2 82.09 1.42 3
 2 -1 2 81.47 1.63 1
 -2 -1 -2 86.67 1.73 2
 3 -1 2 314.77 4.86 3
 3 1 2 314.23 5.02 1
 3 1 2 323.31 5.01 3
 -3 -1 -2 324.48 5.3 2
 3 -1 2 323.2 5.15 1
 -3 1 -2 325.66 5.33 2
 4 -1 2 350.14 5.47 3
 4 1 2 358.31 5.62 3
 -4 1 -2 357.41 6.06 2
 4 1 2 348.65 5.58 1
 4 -1 2 348.93 5.73 1
 5 1 2 359.75 5.75 1
 -5 -1 -2 347.11 6.19 2
 5 -1 2 357.29 5.65 3
 5 -1 2 339.2 5.85 1
 5 1 2 349.47 5.75 3
 -5 1 -2 359.49 6.31 2
 6 1 2 142.39 2.96 3
 6 1 2 140.21 2.86 1
 6 -1 2 145.24 2.88 3
 -6 -1 -2 147.2 3.39 2
 6 -1 2 142.88 3.03 1
 -6 1 -2 142.12 3.45 2
 -7 -1 -2 108.01 2.99 2
 -7 1 -2 111.43 3.09 2
 7 -1 2 104.11 2.64 1
 7 1 2 105.23 2.49 1
 7 -1 2 107.65 2.51 3
 7 1 2 112.7 2.64 3
 -8 -1 -2 48.98 2.11 2
 8 -1 2 52.38 1.89 1
 8 -1 2 49.26 1.72 3
 -8 1 -2 49.27 2.13 2
 8 1 2 48.31 1.81 3
 8 1 2 51.96 1.77 1
 9 -1 2 54.26 2 1
 -9 -1 -2 51.75 2.3 2
 9 1 2 52.04 1.88 1
 9 1 2 52.82 1.98 3
 9 -1 2 50.67 1.89 3
 -9 1 -2 53.55 2.34 2
 10 1 2 6.36 0.93 3
 -10 1 -2 7.3 1.14 2
 10 -1 2 6.81 0.94 3
 -10 -1 -2 7.51 1.2 2
 10 -1 2 6.64 0.93 1
 11 1 2 1.38 0.82 3
 -11 -1 -2 0.59 0.83 2
 -11 1 -2 0.09 0.78 2
 -12 -1 -2 13.43 1.62 2
 -12 1 -2 11.88 1.55 2
 -13 1 -2 3.13 1.2 2
 -13 -1 -2 2.24 1.1 2
 -14 1 -2 6.17 1.54 2
 -14 -1 -2 7.16 1.59 2
 -14 -2 2 13.05 1.82 2
 14 2 -2 10.79 1.57 3
 -14 2 2 11.46 1.65 2
 -13 2 2 2 1.07 2
 13 2 -2 1.54 1.08 3
 -13 -2 2 4.16 1.29 2
 12 -2 -2 0.13 0.86 3
 12 2 -2 0.17 0.8 3
 -12 -2 2 2.07 0.97 2
 -12 2 2 0.2 0.84 2
 11 2 -2 18.48 1.53 3
 -11 2 2 14.33 1.44 2
 -11 -2 2 15.86 1.58 2
 11 -2 -2 14.56 1.35 3
 -10 -2 2 51.44 2.34 2
 10 -2 -2 49.73 2.07 3
 10 -2 -2 44.95 1.8 1
 -10 2 2 49.67 2.26 2
 10 2 -2 45.43 2.09 3
 -9 2 2 -1.17 0.58 2
 9 -2 -2 -0.52 0.55 3
 9 -2 -2 1.46 0.62 1
 9 2 -2 -1.14 0.62 3
 -9 -2 2 -0.19 0.64 2
 -8 -2 2 31.77 1.64 2
 8 2 -2 30.66 1.52 3
 -8 2 2 32.36 1.65 2
 8 -2 -2 34.03 1.48 1
 8 2 -2 34.61 1.19 1
 8 -2 -2 32.73 1.56 3
 7 -2 -2 50.36 1.66 1
 -7 -2 2 49.71 1.85 2
 7 2 -2 50.55 1.36 1
 -7 2 2 51.39 1.84 2
 7 2 -2 54.73 1.85 3
 7 -2 -2 48.24 1.72 3
 6 2 -2 75.46 2.07 3
 -6 -2 2 68.1 2.06 2
 6 -2 -2 74.98 2.01 3
 6 2 -2 72.54 1.59 1
 -6 2 2 72.24 2.05 2
 6 -2 -2 73.66 1.93 1
 5 -2 -2 144.59 2.94 3
 -5 -2 2 148.05 3.11 2
 5 -2 -2 145 2.92 1
 -5 2 2 146.62 3.03 2
 5 2 -2 151.14 3.05 3
 5 2 -2 147.75 2.56 1
 4 2 -2 11.12 0.69 3
 -4 2 2 8.91 0.6 2
 4 -2 -2 10.26 0.68 1
 -4 -2 2 10.5 0.69 2
 4 2 -2 10.3 0.45 1
 4 -2 -2 10.05 0.64 3
 -3 -2 2 530.71 8.28 2
 3 -2 -2 551.43 8.31 1
 -3 2 2 534.29 8.17 2
 3 2 -2 544.97 8.08 1
 3 -2 -2 545.28 8.2 3
 -2 2 2 0.4 0.19 2
 2 -2 -2 0.48 0.26 3
 2 2 -2 0.14 0.24 3
 2 2 -2 0.27 0.14 1
 2 -2 -2 1.26 0.27 1
 -2 -2 2 0.33 0.23 2
 1 2 -2 317.91 4.75 2
 1 2 -2 300.54 4.65 3
 -1 2 2 309.09 4.9 2
 1 -2 -2 300.83 4.77 1
 1 2 -2 311.05 4.73 1
 0 2 -2 1877.1 27.74 2
 0 -2 2 1928.93 28.39 1
 0 -2 -2 1904.67 27.94 1
 0 2 -2 1865.49 27.9 3
 0 -2 -2 1926.44 29.48 2
 -1 2 -2 12.96 0.53 2
 -1 -2 -2 12.72 0.47 1
 1 -2 2 12.47 0.49 1
 1 2 2 13.34 0.5 3
 -1 -2 -2 13.24 0.45 2
 2 -2 2 803.24 11.81 1
 2 -2 2 781.65 11.67 3
 -2 -2 -2 803.64 11.75 1
 -2 -2 -2 789.37 11.74 2
 -2 2 -2 797.51 11.83 2
 2 2 2 800.73 11.56 3
 -3 2 -2 46.85 1.34 2
 3 -2 2 47.67 0.98 3
 3 2 2 47.06 1.21 3
 3 -2 2 44.9 1.22 1
 3 2 2 44.02 1.05 1
 -3 -2 -2 44.39 1.27 2
 4 2 2 235.27 4.04 3
 4 -2 2 240.73 3.82 3
 -4 -2 -2 238.12 4.32 2
 4 2 2 230.95 3.87 1
 -4 2 -2 244.7 4.4 2
 4 -2 2 231.17 4.15 1
 5 -2 2 78.89 1.73 3
 5 2 2 78.22 1.7 1
 -5 2 -2 76.89 2.14 2
 5 2 2 75.84 1.87 3
 5 -2 2 74.67 1.94 1
 -5 -2 -2 75.67 2.11 2
 6 -2 2 21.85 1.16 1
 6 -2 2 22.08 0.95 3
 -6 -2 -2 21.15 1.21 2
 6 2 2 21.33 1.07 3
 6 2 2 21.87 0.96 1
 -6 2 -2 23.73 1.25 2
 7 -2 2 62.16 1.75 3
 -7 -2 -2 63.77 2.2 2
 7 2 2 57.9 1.82 3
 7 -2 2 55.89 1.89 1
 7 2 2 59.72 1.7 1
 -7 2 -2 60.37 2.16 2
 8 2 2 79.36 2.36 3
 -8 -2 -2 78.04 2.69 2
 8 2 2 80.12 2.15 1
 -8 2 -2 78.9 2.7 2
 8 -2 2 81.69 2.45 1
 8 -2 2 77.31 2.16 3
 9 -2 2 164.51 3.66 3
 9 -2 2 171.1 3.93 1
 -9 2 -2 160.68 4.32 2
 -9 -2 -2 161.87 4.34 2
 9 2 2 162.09 3.83 3
 10 -2 2 56.98 2.25 1
 10 -2 2 58.97 2.14 3
 10 2 2 56.81 2.22 3
 -10 2 -2 57.12 2.56 2
 -10 -2 -2 55.55 2.52 2
 -11 2 -2 5.88 1.17 2
 11 2 2 5.97 1.02 3
 -11 -2 -2 3.46 1.1 2
 12 2 2 5.04 1.08 3
 -12 2 -2 1.38 1 2
 -12 -2 -2 1.07 0.98 2
 -13 -2 -2 -1.95 0.73 2
 -13 2 -2 -1.02 0.88 2
 -14 -2 -2 2.71 1.29 2
 -14 2 -2 3.29 1.4 2
 14 3 -2 -0.89 1.02 3
 -14 3 2 0.21 0.97 2
 -14 -3 2 0.02 1.05 2
 -13 -3 2 18.29 1.85 2
 -13 3 2 20.73 1.95 2
 13 3 -2 20.92 1.86 3
 -12 -3 2 7.21 1.3 2
 -12 3 2 4.74 1.15 2
 12 3 -2 6.53 1.23 3
 12 -3 -2 5.82 1.18 3
 11 -3 -2 0.38 0.78 3
 -11 3 2 -0.07 0.72 2
 -11 -3 2 -0.21 0.68 2
 11 3 -2 0.48 0.78 3
 10 -3 -2 6.99 0.91 1
 10 3 -2 8.81 1.07 3
 10 -3 -2 9.16 1.07 3
 -10 -3 2 8.7 1.16 2
 -10 3 2 9.5 1.2 2
 9 3 -2 1.63 0.76 3
 9 -3 -2 1.84 0.73 3
 9 -3 -2 1.08 0.64 1
 -9 -3 2 2.43 0.8 2
 -9 3 2 2.82 0.83 2
 -8 3 2 131.23 3.4 2
 8 -3 -2 127.87 3.16 3
 8 -3 -2 133.63 3.17 1
 -8 -3 2 129.73 3.43 2
 8 3 -2 129.65 3.27 3
 7 -3 -2 52 1.76 1
 7 3 -2 54.8 1.31 1
 7 -3 -2 55.01 1.8 3
 -7 -3 2 52.8 1.93 2
 7 3 -2 51.82 1.82 3
 6 3 -2 99.11 1.86 1
 -6 3 2 101.47 2.53 2
 6 3 -2 95.12 2.43 3
 -6 -3 2 98.82 2.57 2
 6 -3 -2 97.65 2.4 1
 6 -3 -2 96.56 2.35 3
 -5 3 2 697.03 10.74 2
 -5 -3 2 674.08 10.8 2
 5 3 -2 684.49 10.15 1
 5 -3 -2 704.84 10.56 3
 5 -3 -2 677.97 10.72 1
 5 3 -2 688.41 10.65 3
 4 3 -2 1.81 0.22 1
 4 -3 -2 0.8 0.37 3
 4 -3 -2 1.84 0.45 1
 -4 3 2 0.88 0.35 2
 -4 -3 2 1.24 0.39 2
 4 3 -2 1.1 0.4 3
 3 3 -2 828.06 12.39 1
 -3 3 2 830.35 12.11 2
 -3 -3 2 831.06 12.27 2
 3 -3 -2 820.77 12.08 3
 3 3 -2 797.95 12.08 3
 3 -3 -2 814.77 12.31 1
 2 3 -2 1712.06 25.11 3
 -2 3 2 1778.78 25.19 3
 2 3 -2 1803.79 26.5 1
 -2 3 2 1787.22 25.45 2
 -2 -3 2 1793.28 25.44 2
 -1 3 2 634.7 9.5 2
 -1 3 2 621.08 9.32 3
 1 3 -2 644.33 9.45 2
 -1 -3 2 638.36 9.42 1
 1 -3 -2 648.34 9.51 1
 1 3 -2 628.72 9.25 3
 0 -3 -2 897.06 13.12 1
 0 3 -2 889.71 13.06 2
 0 -3 -2 903.33 13.15 2
 0 3 -2 889.15 12.91 3
 0 -3 2 891.35 13.07 1
 0 3 2 894.3 12.89 3
 1 3 2 2056.03 29.78 3
 -1 -3 -2 2116.41 30.52 2
 -1 3 -2 2102.15 29.94 2
 -1 -3 -2 2103.18 30.22 1
 2 3 2 23.16 0.82 3
 2 -3 2 23.35 0.49 3
 -2 3 -2 23.44 0.86 2
 -2 -3 -2 23.82 0.81 2
 2 -3 2 24.89 0.84 1
 -2 -3 -2 23.59 0.69 1
 -3 -3 -2 630.05 9.59 2
 3 -3 2 623.82 9.08 3
 3 -3 2 625.42 9.6 1
 -3 -3 -2 618.11 9.31 1
 -3 3 -2 623.31 9.67 2
 3 3 2 628.75 9.38 3
 -4 -3 -2 1036.84 15.62 2
 4 3 2 1031.78 15.21 1
 4 -3 2 1034.95 14.93 3
 -4 3 -2 1024.26 15.68 2
 4 3 2 1043.4 15.25 3
 4 -3 2 1071.53 15.65 1
 5 -3 2 334.25 5.88 1
 5 3 2 348.98 5.44 1
 5 -3 2 339.78 5.4 3
 -5 -3 -2 340.29 6.07 2
 -5 3 -2 347.04 6.14 2
 5 3 2 340.57 5.76 3
 -6 -3 -2 218.84 4.62 2
 6 -3 2 234.24 4.49 1
 6 3 2 229.91 3.96 1
 6 -3 2 228.88 3.99 3
 -6 3 -2 226.42 4.67 2
 6 3 2 229.1 4.31 3
 7 -3 2 -0.19 0.37 3
 7 -3 2 0.22 0.62 1
 -7 -3 -2 0.68 0.58 2
 7 3 2 0.76 0.51 3
 7 3 2 1.12 0.47 1
 -7 3 -2 0.17 0.53 2
 8 3 2 292.03 5.05 1
 -8 3 -2 288.34 6.01 2
 8 -3 2 276.34 5.11 3
 -8 -3 -2 277.53 5.93 2
 8 -3 2 281.17 5.56 1
 8 3 2 274.42 5.42 3
 9 -3 2 111.57 2.82 3
 9 3 2 114.07 3.1 3
 -9 3 -2 113.56 3.53 2
 9 -3 2 116.47 3.21 1
 -9 -3 -2 113.81 3.51 2
 10 3 2 -0.39 0.61 3
 10 -3 2 -1.1 0.66 1
 -10 3 -2 0.5 0.76 2
 -10 -3 -2 -1.12 0.6 2
 11 3 2 31.61 1.84 3
 -11 -3 -2 33.49 2.11 2
 -11 3 -2 30.68 2.04 2
 12 3 2 0.81 0.87 3
 -12 -3 -2 0.74 1.01 2
 -12 3 -2 1.1 0.89 2
 -13 3 -2 1.37 1.02 2
 -13 -3 -2 -0.76 1.07 2
 -14 -3 -2 3.81 1.39 2
 -14 3 -2 5.33 1.5 2
 -14 4 2 20.51 2.03 2
 14 4 -2 22.02 2.01 3
 -14 -4 2 20.09 2.03 2
 13 4 -2 13.25 1.6 3
 -13 4 2 12.38 1.62 2
 -13 -4 2 15.1 1.73 2
 -12 -4 2 9.24 1.41 2
 12 4 -2 11.88 1.46 3
 -12 4 2 9.89 1.44 2
 11 4 -2 0.44 0.82 3
 11 -4 -2 1.53 0.73 1
 -11 4 2 1.33 0.81 2
 -11 -4 2 1.14 0.85 2
 11 -4 -2 1.52 0.8 3
 -10 -4 2 9.19 1.17 2
 -10 4 2 9.62 1.19 2
 10 4 -2 8.54 1.12 3
 10 -4 -2 11.44 1.11 3
 10 -4 -2 11.13 1.08 1
 9 -4 -2 12.78 1.13 3
 9 4 -2 12.69 1.21 3
 -9 -4 2 12.24 1.23 2
 9 -4 -2 14.38 1.15 1
 -9 4 2 13.09 1.23 2
 8 -4 -2 241.23 4.84 1
 8 -4 -2 238.76 4.78 3
 8 4 -2 241.28 4.95 3
 -8 4 2 223.16 4.94 2
 -8 -4 2 233.92 5.13 2
 7 4 -2 1.18 0.27 1
 -7 -4 2 1.55 0.65 2
 -7 4 2 1.26 0.55 2
 7 -4 -2 0.8 0.53 1
 7 -4 -2 0.85 0.5 3
 7 4 -2 0.96 0.57 3
 -6 4 2 0.32 0.38 2
 6 -4 -2 1.2 0.48 1
 6 4 -2 0.55 0.21 1
 6 4 -2 0.23 0.44 3
 -6 -4 2 0.97 0.49 2
 6 -4 -2 0.71 0.43 3
 5 -4 -2 151.55 3.23 1
 5 -4 -2 156.84 3.11 3
 -5 -4 2 155.82 3.31 2
 5 4 -2 154.76 3.22 3
 -5 4 2 155.55 3.17 2
 5 4 -2 158.3 2.51 1
 -4 -4 2 389.68 6.44 2
 4 4 -2 381.31 6.3 3
 -4 4 2 389.03 6.27 2
 4 -4 -2 394.05 6.25 3
 4 -4 -2 379.96 6.42 1
 3 4 -2 0.78 0.32 3
 -3 4 2 -0.33 0.24 2
 -3 4 2 0.14 0.31 3
 3 -4 -2 0.5 0.37 1
 2 -4 -2 51.4 1.33 1
 2 4 -2 52.15 1.25 3
 -2 4 2 49.78 1.23 3
 -2 -4 2 52.75 0.95 1
 -2 4 2 50.23 1.12 2
 -2 -4 2 50.13 1.29 2
 -1 4 2 3.14 0.37 3
 1 4 -2 3.93 0.33 3
 -1 -4 2 2.59 0.25 1
 1 -4 -2 2.43 0.33 1
 0 4 -2 831.39 11.89 3
 0 -4 2 820.84 12.14 1
 0 -4 -2 842.27 12.21 1
 0 4 -2 827.36 12.2 2
 0 4 2 802.64 11.98 3
 0 4 2 836.42 12.05 2
 -1 4 -2 1179.33 17.65 2
 -1 -4 -2 1206.7 17.49 2
 -1 -4 -2 1217.19 17.67 1
 1 4 2 1222.19 17.4 3
 -1 4 -2 1228.78 18.15 3
 1 -4 2 1224.46 17.71 1
 -2 4 -2 675.55 10.44 3
 -2 -4 -2 666.46 9.95 1
 2 4 2 660.83 9.92 3
 -2 4 -2 667.6 10.17 2
 -2 -4 -2 667.33 10.02 2
 2 -4 2 670.8 10.15 1
 -3 -4 -2 499.53 7.99 2
 3 -4 2 509.16 7.49 3
 -3 4 -2 513.84 8.14 2
 3 -4 2 511.16 8.07 1
 3 4 2 517.93 7.87 3
 -3 -4 -2 505.86 7.69 1
 -4 -4 -2 408.72 6.81 2
 4 -4 2 409.94 6.15 3
 4 4 2 414.99 6.61 3
 4 4 2 398.73 6.25 1
 4 -4 2 411.5 6.79 1
 -4 4 -2 409.56 6.89 2
 -5 4 -2 1536.72 22.95 2
 5 4 2 1550.05 22.3 1
 5 -4 2 1546.08 21.97 3
 5 -4 2 1535.85 22.92 1
 5 4 2 1552.21 22.41 3
 -5 -4 -2 1519.7 22.88 2
 6 4 2 7.39 0.77 3
 6 4 2 6.88 0.54 1
 -6 4 -2 6.83 0.79 2
 6 -4 2 6.44 0.81 1
 6 -4 2 6.84 0.56 3
 -6 -4 -2 5.7 0.76 2
 7 4 2 44.7 1.33 1
 7 -4 2 45.88 1.43 3
 -7 4 -2 43.57 1.86 2
 -7 -4 -2 47.91 1.92 2
 7 -4 2 43.34 1.82 1
 7 4 2 47.16 1.73 3
 -8 -4 -2 10.58 1.18 2
 8 4 2 11.23 1.03 3
 8 -4 2 12.32 0.96 3
 8 -4 2 12.38 1.12 1
 -8 4 -2 8.37 1.06 2
 9 -4 2 8.33 1.07 1
 9 4 2 6.9 0.91 3
 -9 -4 -2 7.98 1.12 2
 9 -4 2 7.48 0.85 3
 -9 4 -2 7.01 1.07 2
 -10 4 -2 6.88 1.15 2
 10 -4 2 7.55 1.1 1
 10 4 2 5.82 0.99 3
 -10 -4 -2 6.44 1.12 2
 11 -4 2 3.45 0.99 1
 11 4 2 2.93 0.92 3
 -11 -4 -2 4.13 1.14 2
 -11 4 -2 2.45 0.96 2
 -12 4 -2 3.12 1.11 2
 -12 -4 -2 3.61 1.16 2
 12 4 2 4.68 1.08 3
 -13 -4 -2 -0.3 0.95 2
 13 4 2 -0.77 0.89 3
 -13 4 -2 -0.17 0.97 2
 -14 4 -2 0.97 1.16 2
 -14 -4 -2 1.33 1.16 2
 14 5 -2 1.89 1.19 3
 -14 5 2 0.64 1.1 2
 -14 -5 2 0.07 1.05 2
 13 5 -2 20.45 1.89 3
 -13 -5 2 19.4 1.89 2
 -13 5 2 22.51 1.99 2
 -12 5 2 47.84 2.5 2
 12 5 -2 49.37 2.52 3
 -12 -5 2 51.52 2.71 2
 11 5 -2 4.73 1.05 3
 11 -5 -2 5.44 0.98 3
 -11 5 2 5.11 1.09 2
 -11 -5 2 3.31 1.03 2
 11 -5 -2 4.56 0.93 1
 10 -5 -2 55.78 2.16 3
 10 5 -2 62.12 2.47 3
 -10 -5 2 56.56 2.52 2
 10 -5 -2 55.11 2.2 1
 -10 5 2 51.01 2.28 2
 9 -5 -2 328.21 6.26 3
 9 5 -2 324.14 6.51 3
 -9 -5 2 333.89 6.79 2
 9 -5 -2 333.47 6.42 1
 -9 5 2 319.05 6.58 2
 8 -5 -2 32.06 1.62 1
 -8 -5 2 35.11 1.75 2
 8 -5 -2 32.68 1.5 3
 -8 5 2 30.44 1.56 2
 8 5 -2 34.38 1.69 3
 7 -5 -2 128.09 3.18 1
 -7 -5 2 132.79 3.35 2
 7 5 -2 125.56 3.16 3
 7 -5 -2 134.01 3.06 3
 -7 5 2 141.18 3.28 2
 6 -5 -2 8.51 0.71 3
 -6 5 2 8.47 0.77 2
 6 -5 -2 5.81 0.78 1
 -6 -5 2 6.99 0.77 2
 6 5 -2 7.96 0.79 3
 -5 -5 2 0.58 0.4 2
 5 5 -2 0.45 0.43 3
 5 -5 -2 0.01 0.4 1
 -5 5 2 0.67 0.35 2
 5 -5 -2 0.34 0.37 3
 -4 5 2 126.97 2.59 2
 4 5 -2 125.23 2.68 3
 -4 -5 2 129.89 2.78 2
 -4 5 2 126.09 2.57 3
 4 -5 -2 125.84 2.77 1
 -3 5 2 43.17 1.21 3
 3 -5 -2 43.68 1.36 1
 -3 5 2 42.92 1.17 2
 -3 -5 2 43.09 1.31 2
 3 5 -2 42.29 1.25 3
 2 -5 -2 1638.27 23.97 1
 -2 -5 2 1649.38 23.94 1
 -2 -5 2 1679.13 23.79 2
 2 5 -2 1620.83 23.4 3
 -2 5 2 1625.89 23.42 3
 -2 5 2 1647.59 23.6 2
 1 5 -2 3357.08 48.09 3
 -1 5 2 3360.06 48.09 3
 -1 5 2 3359.18 48.77 2
 -1 -5 2 3392.61 49.49 1
 1 -5 -2 3394.35 48.85 1
 1 5 -2 3387.85 48.54 2
 0 -5 -2 807.07 12.03 1
 0 5 2 819.5 11.85 2
 0 5 -2 813.69 11.69 3
 0 5 2 805.69 11.87 3
 0 -5 2 809.47 12.01 1
 0 5 -2 814.77 12.09 2
 -1 5 -2 619.75 9.46 2
 -1 5 -2 629.78 9.02 3
 1 -5 2 620.13 9.42 1
 -1 -5 -2 614.9 9.27 1
 1 5 2 623.21 9.26 3
 -1 -5 -2 608.71 9.21 2
 -2 5 -2 748.07 11.48 2
 -2 5 -2 777.89 11.21 3
 2 5 2 750.58 11.24 3
 -2 -5 -2 752.98 11.23 1
 -2 -5 -2 763.89 11.33 2
 2 -5 2 751.42 11.51 1
 3 5 2 150.84 2.92 3
 -3 5 -2 153.08 2.42 3
 -3 -5 -2 145.73 2.94 2
 -3 5 -2 151.2 3.08 2
 -3 -5 -2 151.13 2.6 1
 3 -5 2 150.53 3.03 1
 -4 -5 -2 166.12 3.44 2
 -4 5 -2 174.22 3.57 2
 -4 -5 -2 169.11 2.89 1
 4 -5 2 174.8 2.85 3
 4 5 2 175.63 3.37 3
 4 -5 2 175.41 3.5 1
 5 -5 2 48.44 1.24 3
 5 5 2 52.61 1.19 1
 5 5 2 54.91 1.69 3
 -5 -5 -2 53.73 1.76 2
 5 -5 2 49.48 1.72 1
 -5 5 -2 49.69 1.75 2
 6 -5 2 22.14 0.91 3
 6 5 2 23.15 1.24 3
 -6 5 -2 21.73 1.25 2
 6 -5 2 22.07 1.28 1
 -6 -5 -2 22.59 1.31 2
 6 5 2 22.04 0.82 1
 -7 5 -2 7.24 0.9 2
 7 5 2 8.67 0.7 1
 -7 -5 -2 6.89 0.9 2
 7 -5 2 8.99 0.71 3
 7 5 2 9.46 0.92 3
 7 -5 2 6.96 0.97 1
 8 5 2 101.61 2.85 3
 -8 5 -2 98.18 3.08 2
 8 -5 2 104.43 2.99 1
 8 -5 2 98.19 2.42 3
 -8 -5 -2 95.21 3.04 2
 -9 5 -2 18.15 1.52 2
 9 5 2 17.61 1.31 3
 -9 -5 -2 18.7 1.5 2
 9 -5 2 17.89 1.46 1
 -10 -5 -2 2.94 0.99 2
 10 5 2 0.6 0.75 3
 -10 5 -2 0.46 0.73 2
 10 -5 2 0.11 0.8 1
 11 5 2 3.92 0.99 3
 11 -5 2 5.15 1.1 1
 -11 5 -2 5.06 1.15 2
 -11 -5 -2 3.36 1.06 2
 -12 5 -2 21.66 1.97 2
 -12 -5 -2 18.89 1.84 2
 12 5 2 23.9 1.81 3
 -13 5 -2 1.73 1.14 2
 -13 -5 -2 1.76 1.05 2
 13 5 2 1.64 1.04 3
 -14 -5 -2 0.13 1.05 2
 -14 5 -2 0.7 1.07 2
 -14 6 2 11.58 1.69 2
 -14 -6 2 11.42 1.72 2
 14 6 -2 12.38 1.63 3
 -13 6 2 7.29 1.39 2
 13 6 -2 7.44 1.31 3
 -13 -6 2 5.22 1.37 2
 -12 6 2 0.49 0.9 2
 -12 -6 2 0.22 0.84 2
 12 6 -2 0.47 0.98 3
 -11 -6 2 13.62 1.48 2
 11 -6 -2 12.03 1.29 1
 11 6 -2 11.08 1.35 3
 -11 6 2 13.12 1.39 2
 -10 -6 2 15.66 1.49 2
 10 6 -2 14.07 1.3 3
 -10 6 2 15.75 1.43 2
 10 -6 -2 13.82 1.28 1
 10 -6 -2 16.71 1.31 3
 9 -6 -2 0.05 0.61 1
 -9 6 2 0.41 0.65 2
 -9 -6 2 0.15 0.66 2
 9 6 -2 0.01 0.7 3
 9 -6 -2 0.32 0.69 3
 8 -6 -2 0.42 0.62 1
 -8 6 2 1.87 0.67 2
 8 -6 -2 0.11 0.56 3
 -8 -6 2 0.53 0.67 2
 8 6 -2 0.7 0.63 3
 7 6 -2 0.01 0.54 3
 7 -6 -2 0.88 0.54 3
 -7 6 2 0.5 0.54 2
 -7 -6 2 0.85 0.61 2
 7 -6 -2 2.62 0.73 1
 -6 -6 2 1.17 0.52 2
 6 -6 -2 1.8 0.65 1
 6 -6 -2 1.84 0.5 3
 6 6 -2 2.65 0.58 3
 -6 6 2 1.83 0.5 2
 5 -6 -2 3.87 0.63 1
 -5 -6 2 4.86 0.65 2
 -5 6 2 3.57 0.54 2
 5 6 -2 3.89 0.58 3
 -5 6 2 3.29 0.5 3
 4 -6 -2 6.22 0.68 1
 -4 6 2 5.95 0.57 3
 4 6 -2 4.28 0.56 3
 -4 6 2 5.3 0.54 2
 -4 -6 2 5.56 0.61 2
 -3 6 2 80.44 1.81 2
 3 -6 -2 82.43 2.06 1
 -3 6 2 79.75 1.84 3
 -3 -6 2 81.33 1.99 2
 -3 -6 2 82.42 1.39 1
 3 6 -2 83.12 1.94 3
 2 6 -2 31.19 1.04 3
 -2 6 2 31.73 1.01 3
 -2 -6 2 31.61 0.79 1
 -2 6 2 31.15 0.92 2
 2 6 -2 30.75 1.09 2
 1 6 -2 492.89 7.55 3
 1 -6 -2 514.12 7.88 1
 -1 6 2 499.91 7.66 3
 -1 -6 2 504.04 7.6 1
 -1 6 2 502.59 7.57 2
 0 6 2 320.32 4.92 2
 0 6 -2 313.11 4.8 3
 0 -6 2 313.04 5.04 1
 0 6 -2 299.72 5.16 2
 0 -6 -2 318.32 5.06 1
 0 6 2 309.69 5.02 3
 1 -6 2 0.77 0.37 1
 -1 6 -2 1.17 0.34 2
 -1 6 -2 0.29 0.21 3
 1 6 2 0.98 0.31 3
 -1 -6 -2 0.26 0.24 2
 -1 -6 -2 0.35 0.23 1
 -2 -6 -2 84.29 1.89 2
 -2 6 -2 85.97 1.46 3
 -2 6 -2 84.66 2.03 2
 2 6 2 84.14 1.93 3
 -2 -6 -2 86.11 1.71 1
 3 -6 2 17.35 0.95 1
 -3 -6 -2 15.22 0.84 2
 -3 6 -2 15.89 0.89 2
 -3 6 -2 16.33 0.5 3
 -3 -6 -2 16.08 0.62 1
 3 6 2 15.69 0.86 3
 -4 -6 -2 107.59 1.98 1
 -4 6 -2 102.64 2.58 2
 4 -6 2 107.7 2.61 1
 -4 -6 -2 108.34 2.54 2
 4 6 2 109.3 2.48 3
 -4 6 -2 111.33 1.95 3
 5 6 2 2.05 0.3 1
 5 6 2 2.25 0.54 3
 -5 6 -2 1.58 0.51 2
 5 -6 2 1.47 0.6 1
 -5 -6 -2 1.67 0.53 2
 5 -6 2 1.69 0.35 3
 6 6 2 1.54 0.6 3
 6 -6 2 1.45 0.4 3
 6 -6 2 1.12 0.63 1
 6 6 2 0.66 0.32 1
 -6 -6 -2 0.79 0.54 2
 -6 6 -2 1.3 0.56 2
 7 6 2 3.9 0.75 3
 7 -6 2 5.3 0.57 3
 -7 -6 -2 5.36 0.85 2
 -7 6 -2 4.6 0.82 2
 7 -6 2 5.51 0.88 1
 -8 -6 -2 31.94 1.76 2
 8 6 2 31.66 1.64 3
 -8 6 -2 31.27 1.79 2
 8 -6 2 32.15 1.74 1
 9 -6 2 82.43 2.79 1
 -9 6 -2 77.07 2.85 2
 9 6 2 80.55 2.64 3
 -9 -6 -2 79.13 2.88 2
 -10 6 -2 0.45 0.75 2
 10 -6 2 -0.2 0.68 1
 -10 -6 -2 0.05 0.72 2
 10 6 2 0.28 0.76 3
 -11 -6 -2 84.33 3.39 2
 11 6 2 86.6 3.1 3
 11 -6 2 93.67 3.22 1
 -11 6 -2 83.59 3.33 2
 -12 6 -2 11.85 1.58 2
 -12 -6 -2 9.28 1.48 2
 12 6 2 10.22 1.38 3
 13 6 2 15.55 1.67 3
 -13 6 -2 13.01 1.76 2
 -13 -6 -2 11.57 1.74 2
 -14 -6 -2 10.19 1.79 2
 -14 6 -2 10.4 1.76 2
 14 7 -2 5.62 1.39 3
 -14 -7 2 7.54 1.52 2
 -14 7 2 4.44 1.35 2
 13 7 -2 0.87 0.94 3
 -13 -7 2 1.13 1.05 2
 -13 7 2 -2.46 0.64 2
 12 -7 -2 -0.7 0.77 1
 -12 -7 2 -0.45 0.84 2
 -12 7 2 0.71 0.88 2
 12 7 -2 0.24 0.82 3
 11 -7 -2 44.66 2.17 1
 -11 7 2 43.94 2.3 2
 11 7 -2 41.67 2.27 3
 -11 -7 2 44.5 2.38 2
 10 7 -2 13.83 1.37 3
 10 -7 -2 12.28 1.22 1
 -10 7 2 14.93 1.35 2
 10 -7 -2 15.23 1.27 3
 -10 -7 2 13.08 1.37 2
 9 -7 -2 37.3 1.83 1
 9 -7 -2 35.9 1.68 3
 -9 7 2 34.23 1.76 2
 -9 -7 2 36.91 2 2
 9 7 -2 35.91 1.89 3
 8 -7 -2 5.31 0.81 3
 8 7 -2 3.53 0.79 3
 8 -7 -2 5.33 0.91 1
 -8 7 2 5.97 0.91 2
 -8 -7 2 4.79 0.88 2
 -7 7 2 12.98 1.06 2
 7 7 -2 10.87 1.04 3
 -7 7 2 14.09 1.02 3
 -7 -7 2 11.97 1.08 2
 7 -7 -2 11.73 1.12 1
 6 7 -2 1.31 0.55 3
 -6 -7 2 1.4 0.54 2
 -6 7 2 2.12 0.53 3
 6 -7 -2 1.7 0.64 1
 -6 7 2 1.8 0.51 2
 -5 7 2 1 0.42 2
 -5 7 2 0.9 0.42 3
 5 7 -2 0.4 0.44 3
 5 -7 -2 0.28 0.49 1
 -5 -7 2 0.55 0.46 2
 -4 7 2 180.66 3.4 3
 4 -7 -2 177.19 3.72 1
 4 7 -2 182.74 3.58 3
 -4 7 2 180.29 3.47 2
 -3 7 2 1.72 0.37 2
 -3 7 2 1.72 0.39 3
 -3 -7 2 1.97 0.22 1
 3 -7 -2 0.99 0.42 1
 -3 -7 2 1.49 0.42 2
 3 7 -2 1.76 0.43 3
 2 -7 -2 255.84 4.55 1
 2 7 -2 256.62 4.53 2
 -2 -7 2 258.27 4.06 1
 -2 7 2 253.18 4.3 3
 2 7 -2 250.73 4.31 3
 -2 7 2 249.53 4.23 2
 -1 -7 2 6.04 0.47 1
 1 7 -2 5.02 0.44 3
 -1 7 2 5.55 0.5 3
 1 -7 -2 4.83 0.5 1
 1 7 -2 4.21 0.47 2
 -1 7 2 4.03 0.38 2
 0 -7 2 83.09 1.84 1
 0 7 -2 80.44 1.62 3
 0 7 2 82.32 1.83 3
 0 -7 -2 80.61 1.79 1
 0 7 2 82.25 1.7 2
 1 -7 2 44.79 1.35 1
 1 7 2 46.83 1.34 3
 -1 7 -2 46.33 1.38 2
 -1 -7 -2 45.26 1.22 2
 -1 -7 -2 44.81 1.17 1
 -1 7 -2 45.64 1.02 3
 2 7 2 193.36 3.54 3
 -2 -7 -2 188.34 3.26 1
 2 -7 2 192.3 3.67 1
 -2 7 -2 192.47 3.68 2
 -2 7 -2 188.39 2.99 3
 -2 -7 -2 189.88 3.49 2
 -3 7 -2 30.35 0.73 3
 3 -7 2 30.72 1.28 1
 -3 -7 -2 30.52 0.88 1
 -3 -7 -2 29.14 1.13 2
 3 7 2 30.88 1.18 3
 -3 7 -2 30.12 1.22 2
 4 -7 2 8.91 0.87 1
 -4 -7 -2 6.38 0.66 2
 -4 -7 -2 7.96 0.46 1
 -4 7 -2 6.57 0.7 2
 -4 7 -2 8.05 0.46 3
 4 7 2 7.13 0.7 3
 -5 7 -2 105.01 2.75 2
 5 7 2 101.74 2.59 3
 -5 -7 -2 103.42 2.68 2
 5 7 2 104.38 1.9 1
 5 -7 2 108.1 2.8 1
 -5 7 -2 105.97 2.02 3
 -6 7 -2 1.74 0.62 2
 6 7 2 2.06 0.33 1
 -6 7 -2 1.9 0.39 3
 6 7 2 1.31 0.56 3
 6 -7 2 1.86 0.72 1
 -6 -7 -2 1.53 0.6 2
 -7 7 -2 4.43 0.81 2
 -7 -7 -2 4.79 0.83 2
 7 -7 2 4.68 0.89 1
 7 7 2 5.65 0.8 3
 7 -7 2 3.99 0.53 3
 -8 7 -2 14.77 1.29 2
 8 -7 2 15.47 1.39 1
 -8 -7 -2 14.41 1.33 2
 8 7 2 14.74 1.23 3
 -9 -7 -2 8.91 1.17 2
 -9 7 -2 8.09 1.14 2
 9 7 2 9.29 1.11 3
 9 -7 2 8.39 1.21 1
 10 7 2 0.56 0.8 3
 -10 7 -2 0.29 0.78 2
 -10 -7 -2 1.61 0.88 2
 10 -7 2 0.72 0.79 1
 11 7 2 0.14 0.81 3
 -11 -7 -2 -2.05 0.6 2
 -11 7 -2 -0.1 0.87 2
 11 -7 2 1.3 0.89 1
 -12 7 -2 8.5 1.48 2
 12 -7 2 7.3 1.33 1
 12 7 2 10.19 1.32 3
 -12 -7 -2 10.46 1.56 2
 -13 7 -2 0.53 1.09 2
 13 7 2 -0.94 0.9 3
 -13 -7 -2 2.12 1.11 2
 -14 8 2 1.61 1.15 2
 -14 -8 2 2.29 1.18 2
 14 8 -2 2.54 1.27 3
 13 8 -2 4.24 1.26 3
 -13 -8 2 2.81 1.19 2
 -13 8 2 1.69 1.1 2
 12 -8 -2 64.55 2.73 1
 -12 -8 2 61.21 2.98 2
 -12 8 2 63.15 2.93 2
 12 8 -2 66.41 2.97 3
 -11 -8 2 15.65 1.59 2
 -11 8 2 14.02 1.48 2
 11 -8 -2 16.86 1.52 1
 11 8 -2 14.48 1.52 3
 -10 8 2 5.14 0.95 2
 -10 -8 2 2.63 0.91 2
 10 8 -2 2.92 0.94 3
 10 -8 -2 4.62 0.94 1
 9 -8 -2 108.85 3.31 1
 -9 8 2 108.96 3.26 2
 -9 8 2 108.62 2.93 3
 -9 -8 2 108.64 3.43 2
 9 8 -2 112.27 3.36 3
 8 -8 -2 144.47 3.79 1
 -8 8 2 144.12 3.67 2
 8 8 -2 146.91 3.77 3
 -8 -8 2 138.66 3.79 2
 -8 8 2 146.22 3.37 3
 -7 8 2 190.9 3.92 3
 -7 8 2 182.77 4.15 2
 -7 -8 2 190.26 4.38 2
 7 8 -2 195.19 4.28 3
 7 -8 -2 186.42 4.33 1
 6 8 -2 23.77 1.3 3
 -6 8 2 26.63 1.18 3
 -6 -8 2 24.62 1.39 2
 6 -8 -2 26.15 1.45 1
 -6 8 2 23.79 1.24 2
 5 8 -2 0.34 0.46 3
 -5 8 2 -0.11 0.36 2
 5 -8 -2 -0.03 0.5 1
 -5 8 2 0.31 0.41 3
 -5 -8 2 -0.26 0.41 2
 -4 -8 2 130.1 3 2
 4 -8 -2 127.22 3.03 1
 -4 8 2 129.56 2.77 2
 -4 8 2 127.78 2.68 3
 -3 8 2 48.4 1.4 3
 3 -8 -2 46.05 1.62 1
 -3 8 2 49.04 1.4 2
 3 8 -2 45.28 1.45 3
 -3 -8 2 50.07 1.58 2
 -3 -8 2 47.65 1 1
 -2 -8 2 8.92 0.56 1
 -2 8 2 9.22 0.66 3
 2 -8 -2 9.45 0.76 1
 2 8 -2 9.44 0.7 3
 2 8 -2 9.16 0.7 2
 -2 8 2 8.52 0.58 2
 1 8 -2 13.64 0.72 3
 -1 8 2 14.85 0.75 3
 -1 8 2 13.83 0.67 2
 1 -8 -2 14.2 0.81 1
 -1 -8 2 15.17 0.74 1
 0 8 -2 88.83 1.85 3
 0 -8 -2 95.9 2.06 1
 0 8 2 92.49 2.07 3
 0 -8 2 94.52 2.09 1
 0 8 2 94.1 1.96 2
 0 8 -2 93.88 2.2 2
 1 -8 2 591.25 9.28 1
 1 8 2 583.71 9.06 3
 -1 -8 -2 579.86 9.02 2
 -1 8 -2 593.4 8.66 3
 -1 -8 -2 586.23 9 1
 -1 8 -2 590.85 9.31 2
 -2 -8 -2 29.1 1.06 2
 -2 8 -2 27.61 0.75 3
 -2 8 -2 28.74 1.16 2
 -2 -8 -2 29 0.89 1
 2 -8 2 28.28 1.21 1
 2 8 2 29.89 1.14 3
 -3 -8 -2 0.97 0.39 2
 3 -8 2 2.23 0.57 1
 -3 8 -2 1.28 0.44 2
 -3 -8 -2 1.63 0.3 1
 -3 8 -2 1.86 0.26 3
 3 8 2 1.4 0.45 3
 4 -8 2 3.99 0.69 1
 -4 -8 -2 3.73 0.36 1
 -4 -8 -2 4.16 0.61 2
 -4 8 -2 3.82 0.62 2
 -4 8 -2 3.65 0.33 3
 4 8 2 3.83 0.6 3
 -5 -8 -2 6.65 0.81 2
 -5 8 -2 5.5 0.45 3
 -5 -8 -2 5.18 0.39 1
 -5 8 -2 6.73 0.78 2
 5 8 2 5.57 0.76 3
 5 -8 2 5.92 0.85 1
 6 8 2 0.44 0.54 3
 -6 8 -2 0.58 0.54 2
 6 -8 2 0.73 0.68 1
 -6 -8 -2 1.24 0.57 2
 -6 8 -2 0.9 0.36 3
 7 -8 2 -0.66 0.66 1
 -7 8 -2 -0.49 0.48 2
 7 8 2 0.36 0.57 3
 -7 -8 -2 -0.48 0.53 2
 8 8 2 26.02 1.52 3
 -8 8 -2 25.53 1.6 2
 -8 -8 -2 25.95 1.64 2
 8 -8 2 23.24 1.6 1
 9 -8 2 1.67 0.94 1
 -9 8 -2 0.44 0.7 2
 -9 -8 -2 2.98 0.94 2
 9 8 2 1.9 0.82 3
 10 8 2 6.34 1.09 3
 10 -8 2 7.38 1.23 1
 -10 -8 -2 7.81 1.2 2
 -10 8 -2 6.7 1.19 2
 11 8 2 2.44 0.95 3
 -11 -8 -2 1.08 0.9 2
 11 -8 2 0.71 0.95 1
 -11 8 -2 1.44 0.93 2
 12 -8 2 4.65 1.19 1
 12 8 2 3.14 1.07 3
 -12 8 -2 4.14 1.17 2
 -12 -8 -2 6 1.37 2
 -13 8 -2 10.62 1.69 2
 13 8 2 10.28 1.45 3
 -13 -8 -2 12.76 1.78 2
 14 9 -2 15.33 1.87 3
 13 9 -2 33.38 2.36 3
 -13 9 2 30.21 2.18 2
 -13 -9 2 29.96 2.32 2
 12 9 -2 3.7 1.16 3
 -12 -9 2 7.39 1.42 2
 -12 9 2 5.14 1.24 2
 12 -9 -2 4.67 1.11 1
 11 -9 -2 8.04 1.23 1
 -11 9 2 7.09 1.19 2
 11 9 -2 5.51 1.1 3
 -11 -9 2 7.71 1.28 2
 -10 -9 2 1.06 0.8 2
 10 -9 -2 1.04 0.85 1
 -10 9 2 2.37 0.88 2
 10 9 -2 1.31 0.8 3
 -9 9 2 11.03 1.19 2
 9 -9 -2 15.13 1.34 1
 -9 -9 2 11.82 1.34 2
 9 9 -2 10.88 1.18 3
 -8 -9 2 1.06 0.71 2
 8 -9 -2 0.41 0.7 1
 -8 9 2 1.38 0.69 2
 8 9 -2 0.61 0.67 3
 -8 9 2 1.67 0.68 3
 -7 9 2 -0.02 0.53 3
 7 9 -2 0.59 0.59 3
 -7 9 2 0.27 0.54 2
 7 -9 -2 0.57 0.73 1
 -7 -9 2 0.05 0.56 2
 -6 -9 2 1.92 0.64 2
 -6 9 2 2.13 0.54 3
 6 -9 -2 1.56 0.77 1
 6 9 -2 2.55 0.68 3
 -6 9 2 1.61 0.55 2
 -5 9 2 74.46 1.96 3
 5 -9 -2 74.35 2.33 1
 -5 9 2 72.63 2.06 2
 -5 -9 2 70.87 2.22 2
 5 9 -2 72.09 2.15 3
 -4 9 2 50.07 1.53 3
 -4 9 2 54.96 1.65 2
 -4 -9 2 53.3 1.81 2
 4 9 -2 53.2 1.72 3
 4 -9 -2 52.34 1.85 1
 -3 -9 2 239.62 3.83 1
 -3 9 2 243.76 4.29 3
 3 -9 -2 235.08 4.65 1
 -3 9 2 242.16 4.35 2
 -3 -9 2 242.66 4.62 2
 2 -9 -2 16.55 0.97 1
 -2 -9 2 16.81 0.75 1
 -2 9 2 15.89 0.78 2
 -2 9 2 16.77 0.84 3
 2 9 -2 16.78 0.88 3
 2 9 -2 17.09 0.96 2
 1 -9 -2 14.31 0.86 1
 1 9 -2 15.37 0.87 2
 -1 9 2 15.83 0.75 2
 -1 9 2 16.95 0.85 3
 1 9 -2 17.5 0.82 3
 -1 -9 2 15.49 0.79 1
 0 -9 2 50.15 1.51 1
 0 9 2 51.16 1.49 3
 0 9 -2 51.15 1.57 2
 0 -9 -2 50.34 1.46 1
 0 9 -2 51.74 1.31 3
 0 9 2 50.04 1.37 2
 -1 -9 -2 33.44 1.06 1
 -1 9 -2 34.83 0.97 3
 -1 9 -2 29.53 1.2 2
 1 9 2 30.16 1.17 3
 -1 -9 -2 31.77 1.1 2
 1 -9 2 30.75 1.23 1
 -2 9 -2 80.52 2.17 2
 2 -9 2 81.72 2.21 1
 -2 -9 -2 85.39 2.07 2
 -2 9 -2 85.92 1.65 3
 -2 -9 -2 83.1 1.83 1
 2 9 2 84.92 2.11 3
 -3 9 -2 19.04 0.64 3
 3 -9 2 17.28 1.17 1
 3 9 2 17.84 1.01 3
 -3 -9 -2 18.52 0.75 1
 -3 -9 -2 17.97 0.96 2
 -3 9 -2 18.69 1.04 2
 -4 9 -2 269.24 4.23 3
 -4 -9 -2 274.83 5.13 2
 4 9 2 272.45 5.06 3
 4 -9 2 268.75 5.33 1
 -4 9 -2 269.09 5.24 2
 -4 -9 -2 268.6 4.4 1
 5 -9 2 186.22 4.27 1
 -5 9 -2 197.81 4.27 2
 -5 -9 -2 191.87 3.15 1
 -5 -9 -2 189.79 4.11 2
 5 9 2 186.09 4.01 3
 -6 -9 -2 0.1 0.58 2
 -6 9 -2 0.76 0.56 2
 6 9 2 0.88 0.6 3
 6 -9 2 2.15 0.78 1
 -7 9 -2 61.4 2.33 2
 -7 -9 -2 60.75 2.31 2
 7 9 2 59.78 2.21 3
 7 -9 2 67.46 2.5 1
 -8 -9 -2 11.07 1.25 2
 8 9 2 11.79 1.22 3
 -8 9 -2 11.28 1.2 2
 8 -9 2 12.25 1.37 1
 9 9 2 32.67 1.86 3
 -9 -9 -2 30.25 1.88 2
 9 -9 2 31.24 1.98 1
 -9 9 -2 31.45 1.92 2
 10 9 2 4.2 0.97 3
 -10 -9 -2 6.98 1.19 2
 10 -9 2 6.41 1.15 1
 -10 9 -2 3.94 1.06 2
 -11 9 -2 27.49 1.99 2
 -11 -9 -2 24.77 1.95 2
 11 -9 2 25.87 2 1
 11 9 2 28.49 1.94 3
 12 9 2 1.57 1.05 3
 12 -9 2 0.34 1.01 1
 -12 9 -2 -0.04 0.86 2
 -12 -9 -2 -0.49 0.85 2
 -13 -9 -2 5.69 1.41 2
 -13 9 -2 7.47 1.49 2
 13 9 2 7.24 1.39 3
 -13 -10 2 5.14 1.39 2
 13 10 -2 6.08 1.42 3
 -13 10 2 5.71 1.39 2
 13 -10 -2 9.2 1.45 1
 -12 -10 2 -1 0.82 2
 -12 10 2 0.59 0.92 2
 12 -10 -2 0.57 0.86 1
 12 10 -2 -0.22 0.93 3
 11 10 -2 -0.81 0.78 3
 -11 -10 2 0.06 0.79 2
 -11 10 2 -0.26 0.79 2
 11 -10 -2 1.38 0.89 1
 10 -10 -2 33.01 2.02 1
 10 10 -2 32.65 2.03 3
 -10 10 2 37.39 2 2
 -10 -10 2 34.34 2.07 2
 9 10 -2 14.68 1.32 3
 9 -10 -2 12.9 1.31 1
 -9 10 2 14.95 1.31 2
 -9 -10 2 13.86 1.42 2
 8 -10 -2 68.47 2.59 1
 -8 10 2 69.25 2.45 2
 8 10 -2 66.74 2.49 3
 -8 -10 2 68.53 2.59 2
 -8 10 2 72.51 2.22 3
 -7 10 2 3 0.74 2
 -7 10 2 3.51 0.7 3
 7 10 -2 2.11 0.71 3
 -7 -10 2 2.43 0.76 2
 7 -10 -2 2.87 0.85 1
 6 10 -2 69.99 2.33 3
 -6 10 2 74.06 2.07 3
 -6 -10 2 67.32 2.34 2
 6 -10 -2 71.04 2.44 1
 -6 10 2 71.18 2.23 2
 -5 -10 2 0.22 0.52 2
 -5 10 2 1.42 0.5 2
 5 10 -2 1.18 0.57 3
 5 -10 -2 3.89 0.78 1
 -5 10 2 0.85 0.47 3
 -4 10 2 25.6 1.1 3
 4 -10 -2 24.35 1.35 1
 -4 10 2 25.9 1.16 2
 -4 -10 2 27.16 1.32 2
 -4 -10 2 24.04 0.59 1
 4 10 -2 23.61 1.21 3
 -3 -10 2 57.82 1.29 1
 -3 -10 2 56.54 1.83 2
 3 10 -2 55.03 1.74 3
 -3 10 2 57.71 1.66 2
 3 -10 -2 56.29 1.89 1
 -3 10 2 59.55 1.67 3
 2 10 -2 40.82 1.49 2
 -2 -10 2 43.26 1.22 1
 2 10 -2 43.58 1.42 3
 -2 10 2 42.19 1.35 3
 2 -10 -2 42.64 1.57 1
 -2 10 2 43.72 1.35 2
 -1 10 2 60.61 1.69 3
 1 -10 -2 68.45 1.9 1
 1 10 -2 68.08 1.92 2
 -1 -10 2 66.68 1.7 1
 1 10 -2 64.64 1.68 3
 -1 10 2 66.64 1.69 2
 0 10 2 570.52 8.96 2
 0 10 2 582.31 9.03 3
 0 -10 2 574.99 9.17 1
 0 10 -2 559.71 9.27 2
 0 10 -2 574.44 8.75 3
 0 -10 -2 583.41 9.11 1
 -1 -10 -2 106.5 2.27 1
 -1 -10 -2 104.94 2.35 2
 -1 10 -2 103.64 2.54 2
 1 10 2 102.59 2.41 3
 -1 10 -2 104.53 2.08 3
 1 -10 2 104.46 2.54 1
 -2 -10 -2 259.06 4.62 2
 -2 10 -2 244.47 4.78 2
 2 -10 2 254.4 4.87 1
 2 10 2 245.06 4.62 3
 -2 -10 -2 252.72 4.33 1
 -2 10 -2 253.34 4.07 3
 -3 10 -2 0.06 0.28 3
 3 -10 2 0.02 0.51 1
 -3 10 -2 0.7 0.46 2
 3 10 2 0.47 0.48 3
 -3 -10 -2 -0.08 0.24 1
 -3 -10 -2 -0.14 0.39 2
 4 -10 2 475.99 8.37 1
 4 10 2 476.55 8.03 3
 -4 10 -2 458.17 8.19 2
 -4 10 -2 475.96 7.1 3
 -4 -10 -2 472.49 7.34 1
 -4 -10 -2 481.25 8.1 2
 5 -10 2 37.31 1.87 1
 -5 -10 -2 37.04 1.6 2
 5 10 2 33.27 1.55 3
 -5 10 -2 38.97 1.71 2
 -5 10 -2 34.91 1 3
 -5 -10 -2 36.15 0.94 1
 -6 -10 -2 58.88 2.18 2
 6 -10 2 60.56 2.41 1
 -6 10 -2 58.55 2.23 2
 6 10 2 63.02 2.18 3
 7 10 2 145.17 3.71 3
 -7 -10 -2 148.19 3.86 2
 7 -10 2 148.25 4 1
 -7 10 -2 141.28 3.84 2
 -8 -10 -2 14.24 1.35 2
 8 -10 2 14.38 1.39 1
 8 10 2 15.4 1.33 3
 -8 10 -2 16.5 1.43 2
 9 -10 2 74.93 2.91 1
 9 10 2 60.98 2.48 3
 -9 10 -2 65.74 2.7 2
 -9 -10 -2 68.76 2.82 2
 10 10 2 49.21 2.39 3
 10 -10 2 52.65 2.62 1
 -10 10 -2 51.58 2.57 2
 -10 -10 -2 54.39 2.6 2
 11 -10 2 5.52 1.22 1
 -11 -10 -2 4.55 1.23 2
 -11 10 -2 4.71 1.23 2
 11 10 2 5.95 1.22 3
 -12 10 -2 14.07 1.69 2
 12 -10 2 13.86 1.64 1
 -12 -10 -2 18.14 1.86 2
 12 10 2 17.63 1.66 3
 13 -10 2 2.89 1.26 1
 13 10 2 5.12 1.31 3
 -13 -10 -2 1.83 1.11 2
 -13 10 -2 2.68 1.2 2
 -13 -11 2 -0.04 1.05 2
 13 -11 -2 1.08 0.97 1
 -13 11 2 -0.04 0.99 2
 13 11 -2 -0.68 0.95 3
 -12 11 2 -0.8 0.77 2
 12 11 -2 0.28 0.88 3
 12 -11 -2 0.66 0.94 1
 -12 -11 2 0.38 0.9 2
 11 11 -2 0.1 0.81 3
 11 -11 -2 0.79 0.84 1
 -11 -11 2 0.56 0.85 2
 -11 11 2 -0.1 0.77 2
 -10 11 2 9.97 1.24 2
 10 -11 -2 10.08 1.34 1
 -10 -11 2 7.49 1.24 2
 10 11 -2 8.86 1.21 3
 9 11 -2 -0.23 0.67 3
 -9 11 2 0.49 0.69 2
 9 -11 -2 -0.3 0.78 1
 -9 -11 2 -0.13 0.69 2
 8 -11 -2 2.06 0.9 1
 8 11 -2 1.26 0.83 3
 -8 11 2 2.09 0.74 2
 -8 -11 2 2.14 0.8 2
 7 -11 -2 61.87 2.41 1
 -7 11 2 56.69 2.1 2
 -7 11 2 57.38 1.91 3
 7 11 -2 58.11 2.24 3
 -7 -11 2 57.15 2.28 2
 6 -11 -2 19.61 1.54 1
 -6 11 2 22.86 1.17 3
 -6 -11 2 24.26 1.46 2
 6 11 -2 20.08 1.33 3
 -6 11 2 21.65 1.24 2
 5 11 -2 13.22 1.07 3
 5 -11 -2 13.94 1.22 1
 -5 -11 2 12.49 1.06 2
 -5 11 2 14.97 0.97 3
 -5 11 2 14.87 1.02 2
 -4 11 2 12.13 0.85 3
 4 11 -2 10.89 0.9 3
 4 -11 -2 11.75 1.09 1
 -4 -11 2 11.14 0.96 2
 -4 11 2 10.95 0.87 2
 -4 -11 2 11.26 0.48 1
 -3 -11 2 1.39 0.35 1
 -3 11 2 0.76 0.45 3
 3 11 -2 0.1 0.42 3
 -3 -11 2 0.03 0.41 2
 -3 11 2 0.81 0.41 2
 3 -11 -2 0.33 0.52 1
 2 -11 -2 52.04 1.77 1
 -2 11 2 51.48 1.57 3
 2 11 -2 51.9 1.77 2
 -2 -11 2 50.71 1.4 1
 2 11 -2 51.73 1.62 3
 -2 11 2 52.63 1.56 2
 1 -11 -2 96.58 2.45 1
 1 11 -2 97.32 2.27 3
 -1 11 2 102.5 2.35 3
 -1 -11 2 98.8 2.28 1
 -1 11 2 99.59 2.29 2
 1 11 -2 100.36 2.54 2
 0 11 -2 397.59 6.97 2
 0 11 2 401.45 6.72 3
 0 11 2 412.14 6.69 2
 0 -11 2 396.15 6.82 1
 0 11 -2 402.2 6.46 3
 0 -11 -2 409.37 6.77 1
 -1 11 -2 2 0.52 2
 -1 11 -2 1.22 0.39 3
 1 11 2 1.72 0.54 3
 1 -11 2 1.29 0.54 1
 -1 -11 -2 1.88 0.44 2
 -1 -11 -2 1.38 0.41 1
 -2 11 -2 71.08 1.62 3
 2 -11 2 74.78 2.27 1
 -2 -11 -2 74.21 2.03 2
 -2 11 -2 75.1 2.2 2
 2 11 2 79.29 2.14 3
 -2 -11 -2 72.83 1.78 1
 -3 11 -2 460.86 6.96 3
 -3 -11 -2 464.54 7.29 1
 3 11 2 452.22 7.75 3
 3 -11 2 457.71 8.1 1
 -3 -11 -2 464.31 7.79 2
 -3 11 -2 448.06 7.94 2
 -4 11 -2 27.16 1.38 2
 -4 -11 -2 26.14 0.92 1
 4 -11 2 25.68 1.52 1
 -4 -11 -2 26.73 1.32 2
 4 11 2 26.03 1.35 3
 -4 11 -2 26.28 0.86 3
 -5 11 -2 162.68 3.9 2
 5 -11 2 161.72 4.03 1
 5 11 2 154.58 3.72 3
 -5 -11 -2 168.69 3.86 2
 6 -11 2 255.84 5.61 1
 -6 11 -2 241.84 5.36 2
 -6 -11 -2 261.09 5.4 2
 6 11 2 249.52 5.22 3
 -7 -11 -2 13.44 1.24 2
 -7 11 -2 15.25 1.3 2
 7 11 2 17.21 1.37 3
 7 -11 2 13.13 1.33 1
 8 -11 2 41.84 2.17 1
 -8 11 -2 42.61 2.15 2
 8 11 2 37.12 1.92 3
 -8 -11 -2 41.58 2.08 2
 9 11 2 0.96 0.87 3
 -9 11 -2 0.38 0.82 2
 9 -11 2 0.26 0.86 1
 -9 -11 -2 1.71 0.85 2
 10 -11 2 53.21 2.66 1
 -10 11 -2 53.42 2.66 2
 10 11 2 57.16 2.6 3
 -10 -11 -2 54.8 2.64 2
 11 11 2 46.11 2.48 3
 -11 11 -2 48.7 2.6 2
 11 -11 2 48.19 2.66 1
 -11 -11 -2 39.61 2.45 2
 -12 11 -2 21.42 1.96 2
 12 11 2 19.7 1.81 3
 12 -11 2 20.69 1.87 1
 -12 -11 -2 20.07 1.95 2
 13 -11 2 23.39 2.08 1
 -13 -11 -2 25.07 2.27 2
 13 11 2 25.91 2.08 3
 -13 11 -2 25.3 2.23 2
 -13 -12 2 0.25 1.14 2
 13 12 -2 -0.83 0.97 3
 13 -12 -2 2.28 1.1 1
 -12 -12 2 0.91 0.99 2
 -12 12 2 0.75 0.96 2
 12 12 -2 -0.45 0.82 3
 12 -12 -2 0.39 0.98 1
 11 -12 -2 3.55 1.04 1
 -11 12 2 3.65 1.07 2
 11 12 -2 5.39 1.19 3
 -11 -12 2 3.02 1.09 2
 10 12 -2 0.21 0.75 3
 -10 -12 2 1.03 0.87 2
 10 -12 -2 -0.71 0.71 1
 -10 12 2 -0.97 0.67 2
 9 -12 -2 3.89 0.97 1
 9 12 -2 3.74 0.97 3
 -9 12 2 3.19 0.88 2
 -9 -12 2 2.33 0.91 2
 -8 -12 2 125.52 3.75 2
 8 12 -2 122.13 3.6 3
 8 -12 -2 131.48 3.84 1
 -8 12 2 130.59 3.56 2
 7 12 -2 169.66 4.16 3
 -7 12 2 168.85 4.04 2
 -7 12 2 168.41 3.66 3
 7 -12 -2 159.73 4.27 1
 -7 -12 2 161.01 4.25 2
 -6 -12 2 32.23 1.72 2
 6 -12 -2 34.32 1.82 1
 -6 12 2 33.31 1.44 3
 6 12 -2 33.1 1.71 3
 -6 12 2 31.15 1.54 2
 -5 12 2 61.72 2.04 2
 -5 -12 2 62.2 2.23 2
 5 12 -2 67.57 2.25 3
 5 -12 -2 60.89 2.32 1
 -5 12 2 64.3 1.92 3
 -4 12 2 62.98 1.97 2
 -4 -12 2 62.67 2.16 2
 -4 -12 2 66.56 1.36 1
 -4 12 2 67.14 1.9 3
 4 12 -2 62.49 2.07 3
 4 -12 -2 63.2 2.25 1
 -3 12 2 27.02 1.21 2
 3 12 -2 26.55 1.27 3
 -3 -12 2 28.79 0.99 1
 -3 12 2 28.22 1.19 3
 3 -12 -2 24.98 1.39 1
 -3 -12 2 27.35 1.36 2
 2 12 -2 45.44 1.69 2
 -2 12 2 43.15 1.48 2
 2 12 -2 43.45 1.52 3
 -2 12 2 44.31 1.5 3
 -2 -12 2 45.95 1.38 1
 2 -12 -2 47.7 1.77 1
 1 12 -2 206.49 4.31 2
 -1 12 2 216.6 4.08 3
 1 12 -2 203.34 3.94 3
 -1 12 2 215.19 4.05 2
 1 -12 -2 216.84 4.28 1
 -1 -12 2 211.43 4.02 1
 0 12 2 347.15 5.86 2
 0 12 -2 331.53 6.12 2
 0 12 2 332.95 5.86 3
 0 -12 -2 333.06 5.88 1
 0 -12 2 333.72 5.96 1
 0 12 -2 335.66 5.61 3
 -1 12 -2 97.65 2.62 2
 1 -12 2 97.43 2.59 1
 -1 12 -2 99.6 2.16 3
 -1 -12 -2 102.01 2.34 1
 -1 -12 -2 99.5 2.41 2
 1 12 2 98.29 2.48 3
 -2 -12 -2 139.63 2.84 1
 2 -12 2 135.28 3.35 1
 2 12 2 139.22 3.19 3
 -2 12 -2 142.66 2.68 3
 -2 12 -2 142.05 3.34 2
 -2 -12 -2 143.57 3.16 2
 3 -12 2 35.11 1.71 1
 -3 12 -2 36.53 1.08 3
 -3 -12 -2 34.99 1.45 2
 -3 -12 -2 36.64 1.19 1
 3 12 2 35.77 1.53 3
 -3 12 -2 33.83 1.52 2
 -4 12 -2 7.24 0.58 3
 4 12 2 7.32 0.9 3
 -4 -12 -2 7.25 0.59 1
 -4 12 -2 5.31 0.79 2
 -4 -12 -2 6.32 0.8 2
 4 -12 2 6.06 0.94 1
 5 12 2 56.85 2.11 3
 5 -12 2 55.93 2.29 1
 -5 -12 -2 64.05 2.24 2
 -5 12 -2 58.51 2.18 2
 6 -12 2 47.84 2.24 1
 6 12 2 50.03 2.06 3
 -6 -12 -2 49.55 2.06 2
 -6 12 -2 51.16 2.17 2
 -7 12 -2 41.5 2.04 2
 7 12 2 45.32 2.11 3
 -7 -12 -2 43.61 2.05 2
 7 -12 2 45.87 2.23 1
 8 -12 2 29.08 1.9 1
 -8 12 -2 26.89 1.8 2
 -8 -12 -2 24.62 1.7 2
 8 12 2 27.25 1.71 3
 9 12 2 0.96 0.89 3
 -9 -12 -2 1.83 0.87 2
 -9 12 -2 1.43 0.8 2
 9 -12 2 0.39 0.87 1
 10 -12 2 38.56 2.28 1
 -10 -12 -2 37.61 2.3 2
 10 12 2 37.01 2.19 3
 -10 12 -2 34.29 2.22 2
 11 12 2 4.5 1.17 3
 11 -12 2 4.4 1.19 1
 -11 -12 -2 6.74 1.35 2
 -11 12 -2 4.53 1.25 2
 12 -12 2 11.96 1.6 1
 -12 12 -2 13.75 1.75 2
 -12 -12 -2 15.95 1.87 2
 12 12 2 10.47 1.53 3
 -13 12 -2 1.04 1.16 2
 13 12 2 1.55 1.18 3
 -13 -12 -2 0.39 1.13 2
 13 -12 2 2.44 1.18 1
 13 13 -2 1.26 1.13 3
 13 -13 -2 3.02 1.21 1
 -13 -13 2 2.34 1.17 2
 12 -13 -2 19.54 1.89 1
 -12 -13 2 17.57 1.89 2
 12 13 -2 15.63 1.78 3
 -11 13 2 64.6 2.86 2
 11 -13 -2 63.67 2.99 1
 11 13 -2 67.55 3.06 3
 -11 -13 2 60.81 2.96 2
 -10 13 2 44.3 2.28 2
 10 13 -2 46.38 2.42 3
 -10 -13 2 43.71 2.42 2
 10 -13 -2 47.59 2.5 1
 9 13 -2 34.16 2.07 3
 -9 13 2 31.6 1.86 2
 -9 -13 2 33.07 2.08 2
 9 -13 -2 32.25 2.02 1
 8 -13 -2 169.05 4.58 1
 8 13 -2 175.12 4.52 3
 -8 13 2 176.14 4.35 2
 -8 -13 2 168.7 4.57 2
 7 13 -2 227.99 5.22 3
 -7 13 2 241.02 5.18 2
 7 -13 -2 231.99 5.44 1
 -7 -13 2 236.18 5.42 2
 -6 -13 2 217.4 5.07 2
 6 13 -2 233.87 5.05 3
 -6 13 2 230.09 4.89 2
 6 -13 -2 220.9 5.2 1
 -6 13 2 236.91 4.55 3
 -5 13 2 343.79 6.37 2
 -5 -13 2 346.12 6.71 2
 5 13 -2 328.63 6.41 3
 5 -13 -2 329.21 6.72 1
 -5 13 2 350.99 6.05 3
 -4 13 2 19.97 1.16 2
 -4 13 2 22.14 1.12 3
 4 -13 -2 17.65 1.32 1
 -4 -13 2 19.29 1.33 2
 4 13 -2 18.39 1.27 3
 3 13 -2 292.76 5.5 3
 -3 13 2 302.27 5.5 2
 3 -13 -2 290.95 5.83 1
 -3 -13 2 302.04 4.95 1
 -3 13 2 296.06 5.31 3
 -3 -13 2 291.73 5.76 2
 2 13 -2 49.32 1.84 2
 -2 13 2 51.79 1.67 2
 2 13 -2 52.01 1.74 3
 -2 13 2 48.69 1.63 3
 2 -13 -2 49.13 1.84 1
 -2 -13 2 49.56 1.52 1
 1 13 -2 19.85 1.06 3
 -1 13 2 17.84 0.99 2
 -1 13 2 16.18 1.03 3
 1 13 -2 18.13 1.14 2
 -1 -13 2 16.03 1.03 1
 1 -13 -2 19.82 1.19 1
 0 13 2 448.23 7.7 3
 0 -13 -2 462.51 7.8 1
 0 13 -2 471.18 7.5 3
 0 13 2 465.91 7.74 2
 0 -13 2 468.99 7.87 1
 0 13 -2 464.19 8.08 2
 -1 13 -2 378.59 6.94 2
 1 -13 2 392.26 6.92 1
 -1 -13 -2 379.2 6.62 2
 -1 -13 -2 381.65 6.52 1
 1 13 2 389.42 6.72 3
 -1 13 -2 374.77 6.22 3
 2 13 2 147.75 3.39 3
 -2 -13 -2 147.71 3.02 1
 -2 -13 -2 145.78 3.3 2
 2 -13 2 143.64 3.54 1
 -2 13 -2 144.27 2.83 3
 -2 13 -2 147.03 3.51 2
 -3 -13 -2 4.67 0.71 2
 -3 -13 -2 5.18 0.57 1
 -3 13 -2 6.15 0.57 3
 -3 13 -2 4.68 0.77 2
 3 -13 2 5.61 0.92 1
 3 13 2 5.16 0.78 3
 -4 13 -2 69.2 2.34 2
 4 13 2 64.98 2.26 3
 4 -13 2 62.73 2.46 1
 -4 -13 -2 68.87 2.25 2
 -4 -13 -2 65.34 1.66 1
 -5 13 -2 26.52 1.53 2
 -5 -13 -2 26.95 1.56 2
 5 13 2 28.44 1.57 3
 5 -13 2 28.83 1.76 1
 6 13 2 7.84 1.08 3
 6 -13 2 8.06 1.18 1
 -6 -13 -2 8.85 1.07 2
 -6 13 -2 7.68 1.05 2
 -7 13 -2 151.44 4.13 2
 7 -13 2 155.23 4.32 1
 -7 -13 -2 147.08 4.04 2
 7 13 2 151.36 4.02 3
 8 -13 2 2.98 1.03 1
 8 13 2 3.25 0.92 3
 -8 13 -2 3.13 0.94 2
 -8 -13 -2 4.36 1 2
 -9 13 -2 -0.84 0.66 2
 -9 -13 -2 -0.32 0.7 2
 9 -13 2 -0.68 0.78 1
 9 13 2 -0.49 0.68 3
 -10 -13 -2 1.63 0.92 2
 -10 13 -2 -1 0.71 2
 10 -13 2 2.39 1.11 1
 10 13 2 3.6 1.1 3
 -11 -13 -2 4.48 1.19 2
 -11 13 -2 3.62 1.21 2
 11 -13 2 4.83 1.31 1
 11 13 2 3.38 1.1 3
 -12 13 -2 -0.57 0.9 2
 12 13 2 0.91 1.01 3
 -12 -13 -2 -1.25 0.88 2
 12 -13 2 -0.31 1.06 1
 -12 -14 2 20.37 1.99 2
 12 14 -2 20.34 1.97 3
 12 -14 -2 21.95 1.96 1
 -11 -14 2 61.04 3.07 2
 11 14 -2 60.64 2.99 3
 11 -14 -2 59.09 2.91 1
 -10 14 2 26.9 1.87 2
 10 -14 -2 23.83 1.89 1
 10 14 -2 25.8 1.98 3
 -10 -14 2 24.63 1.93 2
 -9 14 2 37.67 2.05 2
 9 -14 -2 37.55 2.2 1
 -9 -14 2 40.07 2.29 2
 9 14 -2 49.06 2.4 3
 -8 14 2 51.64 2.23 2
 -8 -14 2 44.76 2.27 2
 8 -14 -2 46.89 2.36 1
 8 14 -2 45.34 2.28 3
 7 -14 -2 22.56 1.68 1
 -7 14 2 23.08 1.46 2
 7 14 -2 21.28 1.63 3
 -7 -14 2 24.83 1.76 2
 -6 14 2 184.22 4.24 2
 6 -14 -2 169.9 4.45 1
 6 14 -2 176.38 4.3 3
 -6 -14 2 174.78 4.41 2
 -6 14 2 180.29 3.81 3
 5 -14 -2 50.51 2.24 1
 5 14 -2 49.67 2.06 3
 -5 14 2 49.34 1.73 3
 -5 14 2 53.41 1.98 2
 -5 -14 2 52.49 2.15 2
 4 -14 -2 31.47 1.7 1
 4 14 -2 35.7 1.67 3
 -4 -14 2 31.72 1.64 2
 -4 14 2 32.87 1.51 2
 -4 14 2 32.66 1.39 3
 -3 14 2 23.09 1.2 3
 3 -14 -2 22.44 1.43 1
 -3 14 2 24.56 1.25 2
 3 14 -2 23.09 1.35 3
 -3 -14 2 24.74 1.4 2
 -3 -14 2 24.86 1.02 1
 -2 14 2 2.36 0.63 3
 2 -14 -2 2.3 0.69 1
 -2 -14 2 4.43 0.64 1
 2 14 -2 3.33 0.69 2
 2 14 -2 3.47 0.68 3
 -2 14 2 2.53 0.58 2
 1 14 -2 26.27 1.37 2
 -1 14 2 23.99 1.24 3
 1 -14 -2 23.48 1.28 1
 1 14 -2 25.31 1.22 3
 -1 -14 2 26.66 1.26 1
 -1 14 2 26.14 1.22 2
 0 14 2 2.94 0.63 3
 0 14 2 2.18 0.53 2
 0 -14 -2 2.27 0.59 1
 0 14 -2 2.72 0.66 2
 0 14 -2 2.37 0.55 3
 0 -14 2 2.89 0.7 1
 -1 14 -2 19.31 1.25 2
 1 -14 2 19.9 1.34 1
 1 14 2 20.76 1.25 3
 -1 -14 -2 20.64 1.08 1
 -1 14 -2 19.6 1 3
 -1 -14 -2 22.28 1.18 2
 -2 14 -2 93.86 2.15 3
 2 14 2 91.62 2.59 3
 -2 14 -2 93.7 2.74 2
 2 -14 2 94.46 2.77 1
 -2 -14 -2 96.62 2.59 2
 -2 -14 -2 96.29 2.3 1
 3 14 2 181.56 4.05 3
 3 -14 2 173.28 4.24 1
 -3 -14 -2 175.36 3.98 2
 -3 14 -2 179.59 3.32 3
 -3 -14 -2 184.7 3.54 1
 -3 14 -2 188.14 4.25 2
 -4 14 -2 0.06 0.53 2
 -4 -14 -2 0.77 0.64 2
 4 14 2 1.95 0.76 3
 4 -14 2 1.2 0.78 1
 -5 14 -2 158.75 4.03 2
 5 -14 2 155.9 4.17 1
 -5 -14 -2 158.29 3.93 2
 -6 14 -2 5.54 1 2
 6 -14 2 5.81 1.1 1
 6 14 2 6.88 1 3
 -6 -14 -2 6.34 0.97 2
 -7 -14 -2 2.67 0.92 2
 7 14 2 3.5 0.89 3
 7 -14 2 3.52 1.05 1
 -7 14 -2 2.98 0.92 2
 8 -14 2 10.78 1.39 1
 8 14 2 13.26 1.32 3
 -8 14 -2 12.9 1.41 2
 -8 -14 -2 12.24 1.34 2
 9 14 2 4.53 1.1 3
 9 -14 2 3.78 1.1 1
 -9 -14 -2 4.23 1.08 2
 -9 14 -2 5.54 1.13 2
 -10 -14 -2 2.75 1.13 2
 10 -14 2 1.93 1.11 1
 10 14 2 2.21 0.99 3
 -10 14 -2 2.77 1.06 2
 -11 -14 -2 2.44 1.16 2
 11 14 2 0.33 0.9 3
 -11 14 -2 1.65 1.05 2
 11 -14 2 0.66 1.09 1
 12 14 2 3.59 1.21 3
 -12 14 -2 4.22 1.33 2
 -12 -14 -2 3.44 1.27 2
 12 -14 2 6.41 1.39 1
 12 15 -2 1.68 1.06 3
 12 -15 -2 1.67 1.16 1
 -12 -15 2 0.46 1.06 2
 11 15 -2 9.83 1.45 3
 -11 -15 2 10.04 1.56 2
 11 -15 -2 9.92 1.47 1
 -10 15 2 5.75 1.16 2
 10 -15 -2 2.74 1.1 1
 -10 -15 2 6.04 1.26 2
 10 15 -2 5 1.13 3
 -9 15 2 14.13 1.38 2
 9 -15 -2 12.62 1.49 1
 9 15 -2 11.63 1.35 3
 -9 -15 2 12.29 1.43 2
 -8 -15 2 11.19 1.36 2
 -8 15 2 8.67 1.16 2
 8 -15 -2 12.34 1.44 1
 8 15 -2 8.83 1.2 3
 -7 15 2 17.8 1.42 2
 -7 -15 2 18.72 1.53 2
 7 -15 -2 17.33 1.58 1
 7 15 -2 15.44 1.36 3
 6 -15 -2 12.61 1.34 1
 6 15 -2 14.1 1.28 3
 -6 15 2 14.23 1.22 2
 -6 -15 2 14.48 1.34 2
 5 -15 -2 9.29 1.2 1
 5 15 -2 8.72 1.02 3
 -5 -15 2 7.28 1.03 2
 -5 15 2 9.46 0.89 3
 -5 15 2 8.1 0.95 2
 -4 15 2 59.47 1.93 3
 4 15 -2 56.3 2.15 3
 -4 15 2 59.37 2.07 2
 4 -15 -2 56.41 2.29 1
 -4 -15 2 54.1 2.19 2
 -3 -15 2 125.92 2.64 1
 -3 -15 2 124.59 3.35 2
 -3 15 2 115.29 3.04 2
 3 -15 -2 126.31 3.4 1
 3 15 -2 126.4 3.18 3
 -3 15 2 125.17 2.95 3
 2 15 -2 159.39 3.57 3
 2 -15 -2 161.49 3.84 1
 -2 15 2 160.01 3.57 2
 2 15 -2 157.24 3.83 2
 -2 15 2 157.76 3.49 3
 -2 -15 2 157.26 3.31 1
 -1 -15 2 5.4 0.76 1
 1 15 -2 5.01 0.78 2
 1 -15 -2 3.6 0.79 1
 -1 15 2 5.11 0.71 2
 1 15 -2 4.69 0.71 3
 -1 15 2 4.03 0.72 3
 0 -15 2 22.37 1.27 1
 0 15 2 24.38 1.34 3
 0 15 -2 23.1 1.15 3
 0 15 2 23.31 1.24 2
 0 15 -2 22.06 1.32 2
 0 -15 -2 22.17 1.25 1
 -1 15 -2 20.31 1.08 3
 -1 -15 -2 22.65 1.24 2
 1 -15 2 21.16 1.44 1
 -1 -15 -2 20.95 1.13 1
 -1 15 -2 21.81 1.32 2
 1 15 2 21.14 1.26 3
 -2 15 -2 70.38 1.87 3
 2 -15 2 71.01 2.45 1
 -2 -15 -2 72.93 2 1
 -2 15 -2 75.13 2.48 2
 2 15 2 69.03 2.27 3
 -2 -15 -2 70.15 2.21 2
 3 -15 2 37.81 1.89 1
 3 15 2 39.15 1.82 3
 -3 -15 -2 36.46 1.65 2
 -3 15 -2 39.69 1.84 2
 -3 -15 -2 39.78 1.4 1
 4 15 2 20.06 1.42 3
 -4 -15 -2 21.33 1.35 2
 4 -15 2 22.9 1.63 1
 -4 15 -2 22.68 1.47 2
 5 15 2 30.23 1.71 3
 -5 -15 -2 27.94 1.68 2
 -5 15 -2 27.1 1.64 2
 5 -15 2 31.3 1.88 1
 -6 15 -2 2.07 0.8 2
 -6 -15 -2 1.62 0.74 2
 6 -15 2 1.02 0.87 1
 6 15 2 0.81 0.83 3
 7 15 2 0.68 0.79 3
 7 -15 2 0.12 0.85 1
 -7 -15 -2 0.29 0.76 2
 -7 15 -2 0.46 0.72 2
 8 -15 2 53 2.59 1
 8 15 2 51.29 2.44 3
 -8 15 -2 49.72 2.46 2
 -8 -15 -2 46.08 2.32 2
 -9 15 -2 5.14 1.13 2
 -9 -15 -2 4.88 1.16 2
 9 15 2 6.21 1.21 3
 9 -15 2 2.93 1.12 1
 10 15 2 0.84 0.89 3
 10 -15 2 -0.06 0.94 1
 -10 15 -2 0.3 0.92 2
 -10 -15 -2 0.85 0.98 2
 -11 15 -2 11.48 1.62 2
 11 15 2 11.8 1.53 3
 11 -15 2 7.7 1.53 1
 -11 -15 -2 9.38 1.54 2
 -12 -15 -2 2.94 1.29 2
 12 -15 2 2.12 1.27 1
 12 15 2 -0.57 1.08 3
 -12 15 -2 -0.8 0.93 2
 -12 -16 2 6.37 1.46 2
 12 16 -2 6.56 1.52 3
 12 -16 -2 7.66 1.49 1
 11 16 -2 -0.06 0.99 3
 11 -16 -2 -1.36 0.81 1
 -11 -16 2 -0.42 0.88 2
 10 -16 -2 3.3 1.15 1
 -10 -16 2 4.84 1.22 2
 10 16 -2 5.71 1.18 3
 9 -16 -2 -0.08 0.78 1
 -9 -16 2 2.1 0.91 2
 9 16 -2 2.02 0.94 3
 -9 16 2 0.67 0.81 2
 8 16 -2 7.43 1.16 3
 8 -16 -2 8.09 1.24 1
 -8 -16 2 8.08 1.24 2
 -8 16 2 8.49 1.16 2
 -7 -16 2 4.95 1.1 2
 7 -16 -2 4.13 1.07 1
 7 16 -2 6.08 1.08 3
 -7 16 2 5 0.94 2
 6 16 -2 4.16 0.96 3
 -6 16 2 1.91 0.77 2
 -6 -16 2 2.89 0.94 2
 6 -16 -2 3.73 0.97 1
 -5 16 2 32.2 1.47 3
 -5 -16 2 30.45 1.77 2
 -5 16 2 34.24 1.69 2
 5 -16 -2 31.53 1.86 1
 5 16 -2 34.66 1.82 3
 4 16 -2 112.58 3.14 3
 -4 16 2 113.38 3.04 2
 -4 16 2 104.97 2.74 3
 -4 -16 2 105.28 3.21 2
 4 -16 -2 108.58 3.3 1
 -3 16 2 0.64 0.57 2
 -3 -16 2 0.59 0.65 2
 -3 16 2 0.18 0.59 3
 3 -16 -2 0.83 0.74 1
 3 16 -2 0.11 0.56 3
 2 16 -2 13.68 1.07 3
 -2 16 2 10.35 1 3
 -2 16 2 14.36 1.1 2
 2 -16 -2 13.08 1.15 1
 -2 -16 2 12.06 1 1
 2 16 -2 11.04 1.08 2
 -1 -16 2 55.79 1.91 1
 1 16 -2 52.57 1.85 3
 1 -16 -2 55.53 2.05 1
 -1 16 2 54.28 1.91 2
 1 16 -2 55.81 2.15 2
 -1 16 2 55.17 1.95 3
 0 -16 2 0.12 0.63 1
 0 16 -2 -0.63 0.52 2
 0 16 2 0.61 0.65 3
 0 16 -2 0.25 0.53 3
 0 -16 -2 -0.14 0.51 1
 0 16 2 0.77 0.52 2
 1 16 2 69.09 2.3 3
 -1 -16 -2 66.46 2.16 2
 -1 16 -2 70.07 1.99 3
 -1 16 -2 69.83 2.43 2
 1 -16 2 70.42 2.4 1
 -1 -16 -2 70.23 2.11 1
 2 16 2 68.17 2.31 3
 -2 16 -2 63.84 2.33 2
 -2 -16 -2 60.71 2.12 2
 2 -16 2 63.58 2.42 1
 -2 16 -2 68.57 1.89 3
 -2 -16 -2 65.33 1.93 1
 3 -16 2 3.6 0.93 1
 3 16 2 3.26 0.8 3
 -3 16 -2 2.72 0.78 2
 -3 -16 -2 4.3 0.79 2
 -4 -16 -2 112.06 3.18 2
 4 16 2 109.22 3.2 3
 4 -16 2 106.21 3.37 1
 -4 16 -2 113.81 3.35 2
 5 16 2 56.75 2.31 3
 5 -16 2 56.5 2.57 1
 -5 -16 -2 52.02 2.26 2
 -5 16 -2 58.09 2.37 2
 -6 16 -2 4.72 0.99 2
 6 16 2 6.83 1.06 3
 6 -16 2 6.17 1.14 1
 -6 -16 -2 6.73 1.02 2
 -7 16 -2 29.4 1.86 2
 7 16 2 30.29 1.83 3
 -7 -16 -2 30.05 1.85 2
 7 -16 2 29.52 2.01 1
 8 -16 2 3.18 1.08 1
 -8 16 -2 2.69 1.02 2
 8 16 2 2.34 0.94 3
 -8 -16 -2 1.29 0.87 2
 -9 16 -2 0.82 0.89 2
 9 16 2 0.07 0.8 3
 9 -16 2 1.27 1.01 1
 -9 -16 -2 0.05 0.88 2
 10 16 2 -0.3 0.81 3
 -10 -16 -2 -0.84 0.82 2
 -10 16 -2 -0.75 0.69 2
 10 -16 2 0.57 1.08 1
 -11 16 -2 24.08 2.09 2
 -11 -16 -2 25.39 2.17 2
 11 16 2 23.81 2 3
 11 -16 2 27.24 2.33 1
 11 -17 -2 5.45 1.39 1
 11 17 -2 3.76 1.27 3
 -11 -17 2 3.71 1.19 2
 10 17 -2 0.71 0.92 3
 10 -17 -2 0.88 0.96 1
 -10 -17 2 -0.6 0.87 2
 9 -17 -2 4.59 1.18 1
 9 17 -2 3.98 1.11 3
 -9 -17 2 1.12 0.89 2
 -8 17 2 0.39 0.76 2
 -8 -17 2 1.33 0.88 2
 8 -17 -2 0.92 0.89 1
 8 17 -2 2.03 0.95 3
 -7 -17 2 0.47 0.77 2
 7 -17 -2 0.13 0.81 1
 7 17 -2 0.15 0.72 3
 -7 17 2 -0.05 0.72 2
 6 17 -2 0.09 0.75 3
 -6 17 2 1.11 0.72 2
 -6 -17 2 0.56 0.78 2
 6 -17 -2 0.57 0.77 1
 5 17 -2 14.49 1.26 3
 -5 -17 2 14.86 1.35 2
 5 -17 -2 13.3 1.35 1
 -5 17 2 16.06 1.3 2
 4 -17 -2 5.8 1.06 1
 -4 -17 2 2.92 0.87 2
 4 17 -2 4.56 0.86 3
 -4 17 2 4.49 0.82 3
 -4 17 2 5.35 0.89 2
 -3 17 2 0.58 0.58 2
 -3 17 2 0.32 0.61 3
 3 -17 -2 0.59 0.69 1
 -3 -17 2 0.59 0.63 2
 3 17 -2 0.6 0.62 3
 2 -17 -2 27.53 1.62 1
 2 17 -2 25.94 1.45 3
 -2 17 2 22.32 1.37 3
 -2 17 2 25.79 1.42 2
 -2 -17 2 27.47 1.3 1
 2 17 -2 26.21 1.62 2
 -1 17 2 9.89 1 3
 -1 17 2 8.56 0.93 2
 1 17 -2 8.66 0.95 3
 1 -17 -2 9.16 1.01 1
 1 17 -2 7.87 0.98 2
 -1 -17 2 8.67 0.97 1
 0 -17 2 33.59 1.67 1
 0 17 -2 38.67 1.56 3
 0 17 -2 36.78 1.81 2
 0 17 2 34.37 1.62 3
 0 17 2 37.69 1.65 2
 0 -17 -2 37.14 1.6 1
 -1 17 -2 86.45 2.32 3
 -1 17 -2 91.83 2.88 2
 1 -17 2 89.14 2.8 1
 -1 -17 -2 86.72 2.45 1
 -1 -17 -2 87.33 2.6 2
 1 17 2 84.56 2.66 3
 -2 -17 -2 26.68 1.26 1
 -2 -17 -2 28.17 1.52 2
 2 17 2 24.09 1.49 3
 -2 17 -2 27.37 1.59 2
 2 -17 2 27.33 1.66 1
 3 17 2 45.13 2.06 3
 -3 -17 -2 47.81 1.97 2
 3 -17 2 48.42 2.19 1
 -3 17 -2 48.99 2.17 2
 4 -17 2 8.08 1.19 1
 -4 17 -2 10.31 1.22 2
 4 17 2 6.34 1.03 3
 -4 -17 -2 8.87 1.12 2
 5 -17 2 1.35 0.9 1
 5 17 2 -0.28 0.78 3
 -5 -17 -2 0.81 0.76 2
 -5 17 -2 1.17 0.84 2
 -6 -17 -2 39.74 2.04 2
 -6 17 -2 39.33 2.14 2
 6 -17 2 42.06 2.36 1
 6 17 2 39.79 2.07 3
 7 17 2 9.48 1.29 3
 -7 17 -2 8.89 1.23 2
 7 -17 2 9.49 1.36 1
 -7 -17 -2 10.18 1.27 2
 8 17 2 0.79 0.92 3
 8 -17 2 1.19 0.99 1
 -8 -17 -2 1.14 0.86 2
 -8 17 -2 0.92 0.84 2
 -9 -17 -2 0.08 0.94 2
 9 17 2 0.66 0.92 3
 -9 17 -2 1.26 0.95 2
 9 -17 2 0.93 1.08 1
 10 -17 2 11.37 1.62 1
 -10 -17 -2 6.5 1.37 2
 10 17 2 11.78 1.59 3
 -10 17 -2 9.82 1.49 2
 11 -17 2 1.22 1.16 1
 -11 -17 -2 1.17 1.09 2
 11 17 2 0.68 1.12 3
 -11 17 -2 1.16 1.16 2
 11 -18 -2 4.9 1.31 1
 -11 -18 2 5.71 1.42 2
 11 18 -2 4.7 1.27 3
 10 18 -2 27.39 2.17 3
 -10 -18 2 27.65 2.24 2
 10 -18 -2 26.14 2.21 1
 -9 -18 2 0.2 0.89 2
 9 -18 -2 2.48 1.09 1
 9 18 -2 1.24 0.91 3
 8 -18 -2 4.65 1.14 1
 -8 -18 2 4.87 1.13 2
 8 18 -2 5.86 1.2 3
 7 18 -2 23.44 1.72 3
 -7 -18 2 23.58 1.79 2
 7 -18 -2 27.43 2 1
 6 -18 -2 2.49 0.93 1
 6 18 -2 2.18 0.91 3
 -6 18 2 1.72 0.83 2
 -6 -18 2 2.69 0.95 2
 -5 -18 2 30.82 1.84 2
 5 -18 -2 27.57 1.91 1
 5 18 -2 29.09 1.79 3
 -5 18 2 30.53 1.7 2
 -4 -18 2 163.46 4.37 2
 4 -18 -2 168.33 4.47 1
 -4 18 2 170.37 4.13 2
 4 18 -2 168.83 4.18 3
 -3 18 2 4.23 0.84 2
 -3 -18 2 5.24 0.98 2
 3 18 -2 5.09 0.92 3
 3 -18 -2 4.28 0.98 1
 -3 18 2 5.21 0.85 3
 2 18 -2 0.59 0.61 3
 2 18 -2 1.23 0.68 2
 -2 18 2 0.37 0.68 3
 -2 -18 2 0.67 0.6 1
 -2 18 2 0.33 0.6 2
 2 -18 -2 2.67 0.78 1
 -1 18 2 16.41 1.29 3
 -1 -18 2 20.24 1.28 1
 -1 18 2 20.22 1.3 2
 1 18 -2 24.03 1.57 2
 1 18 -2 22.3 1.33 3
 1 -18 -2 20.47 1.33 1
 0 -18 2 12.47 1.1 1
 0 18 2 13.93 1.18 3
 0 18 -2 14.23 1.13 3
 0 -18 -2 11.15 1 1
 0 18 2 14.31 1.15 2
 0 18 -2 13.09 1.25 2
 -1 -18 -2 23.83 1.39 2
 1 -18 2 22.62 1.5 1
 -1 18 -2 25.15 1.62 2
 1 18 2 24.43 1.53 3
 -1 -18 -2 25.49 1.34 1
 -1 18 -2 28.07 1.36 3
 -2 -18 -2 45.36 1.96 2
 2 18 2 50.11 2.12 3
 -2 18 -2 47.52 2.13 2
 2 -18 2 47.5 2.15 1
 -2 -18 -2 48.57 1.76 1
 -3 18 -2 0.56 0.77 2
 -3 -18 -2 -0.47 0.62 2
 3 -18 2 -1.3 0.73 1
 3 18 2 0.01 0.79 3
 -4 -18 -2 2.14 0.78 2
 4 -18 2 1.39 0.9 1
 4 18 2 1.88 0.85 3
 -4 18 -2 1.98 0.82 2
 -5 -18 -2 0.27 0.68 2
 5 18 2 -0.43 0.71 3
 -5 18 -2 1.03 0.8 2
 5 -18 2 0.53 0.89 1
 -6 -18 -2 1.15 0.8 2
 6 18 2 -0.87 0.69 3
 -6 18 -2 0.65 0.76 2
 6 -18 2 0.89 0.96 1
 -7 18 -2 -0.48 0.76 2
 -7 -18 -2 -0.39 0.77 2
 7 18 2 -0.47 0.73 3
 7 -18 2 0.47 0.9 1
 -8 18 -2 0.66 0.91 2
 8 18 2 0.57 0.85 3
 -8 -18 -2 1.76 1 2
 8 -18 2 1.63 1.02 1
 -9 -18 -2 3.27 1.2 2
 9 18 2 2.15 1 3
 9 -18 2 0.94 1.11 1
 -9 18 -2 2.48 1.1 2
 -10 18 -2 3.3 1.28 2
 10 18 2 5.57 1.35 3
 10 -18 2 3.57 1.37 1
 -10 -18 -2 4.01 1.21 2
 10 -19 -2 1.38 1.11 1
 10 19 -2 0.74 0.96 3
 -10 -19 2 0.83 1.05 2
 9 -19 -2 12.35 1.58 1
 -9 -19 2 9.57 1.47 2
 9 19 -2 11.51 1.49 3
 8 -19 -2 7.25 1.31 1
 8 19 -2 4.61 1.17 3
 -8 -19 2 4.66 1.17 2
 -7 -19 2 0.56 0.84 2
 7 19 -2 0.26 0.85 3
 7 -19 -2 -0.29 0.78 1
 6 -19 -2 15.03 1.52 1
 -6 -19 2 14.01 1.46 2
 6 19 -2 12.68 1.4 3
 -5 -19 2 8.87 1.22 2
 5 -19 -2 7.64 1.22 1
 -5 19 2 7.31 1.08 2
 5 19 -2 10.27 1.18 3
 4 -19 -2 31.72 1.92 1
 4 19 -2 29.14 1.7 3
 -4 19 2 33.85 1.77 2
 -4 -19 2 30.71 1.85 2
 3 -19 -2 1.03 0.76 1
 -3 -19 2 1.16 0.81 2
 -3 19 2 0.4 0.68 2
 -3 19 2 1.39 0.73 3
 3 19 -2 1.22 0.73 3
 2 19 -2 29.54 1.59 3
 -2 -19 2 26.51 1.69 2
 -2 19 2 29.7 1.59 2
 2 19 -2 28.88 1.78 2
 -2 19 2 30.37 1.64 3
 2 -19 -2 31.2 1.76 1
 1 -19 -2 -0.37 0.61 1
 -1 -19 2 0.7 0.65 1
 -1 19 2 -0.27 0.58 2
 1 19 -2 0.86 0.74 2
 1 19 -2 0.87 0.65 3
 -1 19 2 -0.28 0.63 3
 0 19 2 2.21 0.72 2
 0 19 -2 -0.09 0.61 2
 0 -19 2 0.99 0.72 1
 0 -19 -2 1.18 0.64 1
 0 19 2 1.44 0.76 3
 0 19 -2 1.91 0.66 3
 1 -19 2 64.37 2.49 1
 -1 19 -2 63.43 2.48 2
 -1 -19 -2 66.88 2.2 1
 1 19 2 66.97 2.43 3
 -1 -19 -2 64.64 2.33 2
 -2 -19 -2 2.1 0.73 2
 2 19 2 2.87 0.9 3
 -2 19 -2 3.07 0.86 2
 2 -19 2 1.13 0.81 1
 -3 19 -2 36.98 1.96 2
 3 -19 2 37.75 2.07 1
 -3 -19 -2 39.39 1.95 2
 3 19 2 35.57 1.95 3
 -4 -19 -2 0.81 0.68 2
 4 19 2 -1.04 0.73 3
 4 -19 2 0.77 0.85 1
 -4 19 -2 -0.48 0.7 2
 -5 -19 -2 3.21 0.95 2
 5 19 2 1.03 0.82 3
 5 -19 2 0.52 0.84 1
 -5 19 -2 2.9 0.96 2
 6 19 2 11.99 1.37 3
 -6 19 -2 11.58 1.37 2
 -6 -19 -2 15.26 1.48 2
 6 -19 2 13.39 1.54 1
 -7 -19 -2 0.7 0.83 2
 7 -19 2 0.71 1.05 1
 -7 19 -2 1.84 0.96 2
 7 19 2 0.83 0.85 3
 8 -19 2 18.29 1.87 1
 -8 -19 -2 19.57 1.76 2
 8 19 2 19.86 1.79 3
 -8 19 -2 20.3 1.79 2
 -9 19 -2 0.05 0.89 2
 9 -19 2 -0.62 1.02 1
 9 19 2 -1.11 0.86 3
 -9 -19 -2 0.43 0.95 2
 -10 -19 -2 3.56 1.27 2
 10 -19 2 2.7 1.21 1
 -10 19 -2 1.63 1.12 2
 10 19 2 1.59 1.05 3
 10 20 -2 5.78 1.34 3
 10 -20 -2 5 1.33 1
 -10 -20 2 5.17 1.46 2
 9 20 -2 6.56 1.3 3
 9 -20 -2 6.5 1.4 1
 -9 -20 2 7.1 1.37 2
 8 -20 -2 5.64 1.23 1
 -8 -20 2 6.44 1.3 2
 8 20 -2 6.63 1.25 3
 7 20 -2 0.02 0.81 3
 -7 -20 2 1.73 0.94 2
 7 -20 -2 0.33 0.88 1
 6 -20 -2 11.05 1.49 1
 6 20 -2 13.16 1.39 3
 -6 -20 2 11.61 1.41 2
 -5 -20 2 42.79 2.26 2
 5 -20 -2 42.45 2.29 1
 5 20 -2 41.89 2.18 3
 -4 20 2 6.47 1.07 2
 4 20 -2 7.49 1.1 3
 -4 -20 2 6.62 1.12 2
 4 -20 -2 6.78 1.15 1
 -3 20 2 8.58 1.12 2
 -3 -20 2 7.73 1.17 2
 3 20 -2 9.67 1.12 3
 3 -20 -2 9.83 1.21 1
 -2 -20 2 0.93 0.7 2
 2 20 -2 1.26 0.72 3
 -2 20 2 1.03 0.66 2
 2 -20 -2 0.61 0.74 1
 -2 20 2 -1.26 0.61 3
 -1 20 2 0.61 0.7 3
 1 20 -2 -0.38 0.62 3
 -1 20 2 0.55 0.65 2
 1 20 -2 0.52 0.7 2
 -1 -20 2 -0.2 0.59 1
 1 -20 -2 0 0.6 1
 0 20 -2 -0.06 0.62 3
 0 20 -2 0.03 0.64 2
 0 20 2 0.71 0.68 2
 0 -20 2 -0.13 0.66 1
 0 20 2 1.25 0.78 3
 0 -20 -2 2.23 0.71 1
 1 -20 2 0.02 0.79 1
 -1 20 -2 0.68 0.71 2
 -1 -20 -2 -0.34 0.56 2
 1 20 2 -0.02 0.65 3
 -1 -20 -2 0.67 0.59 1
 -2 -20 -2 2.16 0.8 2
 2 -20 2 3.56 0.95 1
 -2 20 -2 3.89 1 2
 2 20 2 4.92 0.99 3
 3 20 2 13.41 1.32 3
 -3 20 -2 17.06 1.53 2
 -3 -20 -2 14.74 1.35 2
 3 -20 2 16.74 1.58 1
 4 20 2 0.7 0.79 3
 -4 20 -2 0.8 0.83 2
 4 -20 2 0.9 0.87 1
 -4 -20 -2 1.56 0.82 2
 -5 20 -2 16.14 1.56 2
 5 20 2 12.29 1.44 3
 -5 -20 -2 14.31 1.41 2
 5 -20 2 15.26 1.62 1
 6 -20 2 -0.04 0.88 1
 -6 20 -2 -0.51 0.76 2
 6 20 2 0.39 0.9 3
 -6 -20 -2 0.69 0.79 2
 7 20 2 -1.02 0.82 3
 -7 20 -2 -0.66 0.84 2
 -7 -20 -2 0.32 0.89 2
 7 -20 2 1.16 0.99 1
 8 20 2 1.91 1.09 3
 -8 20 -2 3.8 1.16 2
 -8 -20 -2 2.87 1.08 2
 8 -20 2 3.72 1.25 1
 9 -20 2 1.92 1.21 1
 -9 -20 -2 0.38 0.93 2
 -9 20 -2 -1.01 0.81 2
 9 20 2 1.58 1.1 3
 9 -21 -2 2 1.14 1
 -9 -21 2 0.58 1.05 2
 9 21 -2 1.22 1.08 3
 8 21 -2 16.53 1.74 3
 8 -21 -2 16.16 1.74 1
 -8 -21 2 14.11 1.71 2
 -7 -21 2 3.33 1.12 2
 7 -21 -2 4.22 1.17 1
 7 21 -2 4.25 1.11 3
 -6 -21 2 17.46 1.67 2
 6 21 -2 16.59 1.61 3
 6 -21 -2 20.9 1.81 1
 5 -21 -2 28.9 2.08 1
 5 21 -2 27.23 1.81 3
 -5 -21 2 30.15 2 2
 -4 -21 2 1.62 0.88 2
 4 -21 -2 4.97 1.11 1
 4 21 -2 5.81 1.1 3
 -3 21 2 15.65 1.38 2
 3 21 -2 16.02 1.39 3
 -3 -21 2 13.83 1.41 2
 3 -21 -2 16.99 1.46 1
 -2 21 2 12.99 1.24 2
 2 -21 -2 9.02 1.12 1
 -2 -21 2 12.37 1.33 2
 -2 21 2 12.05 1.18 3
 2 21 -2 11.69 1.2 3
 -1 21 2 1.21 0.79 3
 1 -21 -2 2.84 0.81 1
 -1 21 2 1.39 0.72 2
 1 21 -2 0.38 0.67 3
 1 21 -2 1.65 0.82 2
 0 21 -2 34.17 1.98 2
 0 21 2 31.16 1.79 3
 0 -21 2 33.69 1.81 1
 0 -21 -2 33.24 1.77 2
 0 -21 -2 33.6 1.73 1
 1 21 2 0.4 0.77 3
 -1 21 -2 -0.32 0.71 2
 1 -21 2 0.13 0.77 1
 -1 -21 -2 -0.67 0.57 2
 2 -21 2 2.13 0.89 1
 -2 21 -2 3.03 0.93 2
 2 21 2 3.71 0.99 3
 -2 -21 -2 4.61 0.96 2
 3 21 2 2.43 0.97 3
 -3 21 -2 2.65 0.96 2
 3 -21 2 2.58 0.94 1
 -3 -21 -2 2.44 0.89 2
 4 21 2 0.59 0.81 3
 -4 -21 -2 -1.04 0.65 2
 -4 21 -2 -0.75 0.66 2
 4 -21 2 0.73 0.92 1
 5 21 2 0.11 0.8 3
 -5 21 -2 0.08 0.79 2
 5 -21 2 0.55 1.04 1
 -5 -21 -2 0.53 0.81 2
 6 21 2 0.15 0.91 3
 -6 21 -2 0.24 0.91 2
 6 -21 2 -0.29 0.9 1
 -6 -21 -2 1.76 0.87 2
 -7 21 -2 5.92 1.32 2
 7 -21 2 5.47 1.29 1
 7 21 2 3.7 1.13 3
 -7 -21 -2 5.03 1.17 2
 -8 21 -2 1.89 1.03 2
 -8 -21 -2 0.78 1 2
 8 21 2 -0.04 0.88 3
 8 -21 2 0.43 1.1 1
 -9 -21 -2 2.82 1.2 2
 9 21 2 2.3 1.19 3
 9 -21 2 0.37 1.07 1
 -9 21 -2 2.37 1.13 2
 9 -22 -2 22.56 2.09 1
 -9 -22 2 19.01 2.06 2
 9 22 -2 19.45 1.96 3
 8 -22 -2 7.28 1.42 1
 -8 -22 2 7.04 1.45 2
 8 22 -2 7.98 1.44 3
 -7 -22 2 1.09 1.03 2
 7 22 -2 2.54 1.08 3
 7 -22 -2 4.71 1.3 1
 6 -22 -2 18.19 1.78 1
 -6 -22 2 18.02 1.8 2
 6 22 -2 18.77 1.65 3
 5 22 -2 13.18 1.45 3
 5 -22 -2 9 1.41 1
 -5 -22 2 11.22 1.5 2
 4 -22 -2 38.29 2.24 1
 4 22 -2 38.67 2.11 3
 -4 -22 2 38.91 2.27 2
 3 -22 -2 2.68 0.91 1
 3 22 -2 2.29 0.85 3
 -3 -22 2 3.87 1.03 2
 -2 22 2 0.75 0.78 2
 2 22 -2 1.59 0.78 3
 2 -22 -2 0.79 0.79 1
 -2 -22 2 2.48 0.93 2
 1 -22 -2 18.79 1.49 1
 -1 22 2 15.99 1.38 2
 1 22 -2 17.07 1.53 2
 -1 22 2 15.4 1.38 3
 1 22 -2 15.82 1.31 3
 0 -22 2 1.1 0.74 1
 0 -22 -2 0.26 0.68 2
 0 22 2 1.41 0.82 3
 0 -22 -2 0.99 0.67 1
 0 22 -2 2.81 0.98 2
 1 -22 2 31 1.89 1
 -1 -22 -2 29.38 1.71 2
 -1 22 -2 32.4 1.94 2
 1 22 2 27.47 1.81 3
 2 22 2 2.04 0.93 3
 2 -22 2 3.58 1.03 1
 -2 22 -2 2.58 1.02 2
 -2 -22 -2 1.9 0.83 2
 3 -22 2 1.78 0.95 1
 -3 -22 -2 0.35 0.82 2
 -3 22 -2 2.09 1 2
 3 22 2 2.49 0.93 3
 -4 22 -2 7.57 1.32 2
 4 -22 2 8.14 1.39 1
 4 22 2 6.66 1.17 3
 -4 -22 -2 7.7 1.17 2
 5 22 2 12.65 1.53 3
 -5 22 -2 11.81 1.44 2
 5 -22 2 13.75 1.59 1
 -5 -22 -2 12.55 1.42 2
 -6 -22 -2 -0.54 0.78 2
 -6 22 -2 0.03 0.85 2
 6 -22 2 0.73 1.04 1
 6 22 2 -0.09 0.93 3
 -7 -22 -2 6.74 1.29 2
 7 22 2 6.82 1.29 3
 7 -22 2 5.83 1.41 1
 -7 22 -2 7.3 1.35 2
 8 -22 2 -1.28 0.87 1
 -8 -22 -2 -0.28 0.82 2
 -8 22 -2 -0.67 0.95 2
 8 22 2 0.93 0.99 3
 -8 -23 2 -0.09 0.96 2
 8 23 -2 2.1 1.12 3
 8 -23 -2 1.29 0.99 1
 -7 -23 2 10.06 1.56 2
 7 -23 -2 8.67 1.43 1
 7 23 -2 11.56 1.52 3
 -6 -23 2 7.73 1.38 2
 6 -23 -2 7.1 1.31 1
 6 23 -2 7.86 1.36 3
 -5 -23 2 -0.61 0.8 2
 5 23 -2 0.17 0.82 3
 5 -23 -2 0.24 0.94 1
 -4 -23 2 0.59 0.92 2
 4 23 -2 1.24 0.86 3
 4 -23 -2 0.17 0.84 1
 -3 -23 2 3.66 1.03 2
 3 23 -2 4.39 1.04 3
 3 -23 -2 5.16 1.07 1
 -2 -23 2 0.81 0.88 2
 2 -23 -2 1.39 0.83 1
 2 23 -2 1.67 0.84 3
 -1 23 2 0.28 0.79 3
 1 -23 -2 3.29 0.87 1
 1 23 -2 4.27 1.04 2
 0 23 -2 5.91 1.12 2
 0 -23 -2 3.78 0.94 2
 0 23 2 3.11 0.96 3
 0 -23 -2 3.95 0.88 1
 1 23 2 5.23 1.1 3
 -1 23 -2 5.33 1.16 2
 -1 -23 -2 5.39 1.05 2
 1 -23 2 6.79 1.13 1
 2 -23 2 3.71 1.07 1
 -2 -23 -2 3.12 0.99 2
 -2 23 -2 2.29 1 2
 -3 -23 -2 31.04 1.97 2
 -3 23 -2 30.18 2.1 2
 3 23 2 34.38 2.09 3
 3 -23 2 33.33 2.2 1
 -4 -23 -2 26.24 1.9 2
 4 23 2 25.13 1.96 3
 4 -23 2 26.75 2.04 1
 -4 23 -2 34.33 2.14 2
 -5 23 -2 3.84 1.12 2
 5 23 2 2.8 1.05 3
 5 -23 2 2.89 1.16 1
 -5 -23 -2 0.69 0.92 2
 -6 -23 -2 5.45 1.2 2
 -6 23 -2 6.02 1.35 2
 6 23 2 5.47 1.2 3
 6 -23 2 5.61 1.33 1
 7 -23 2 1.03 1.08 1
 7 23 2 -0.09 0.93 3
 -7 -23 -2 -0.27 0.94 2
 -7 23 -2 0.53 1.06 2
 -7 -24 2 0.46 1 2
 7 -24 -2 0.69 0.94 1
 7 24 -2 1 1.05 3
 6 -24 -2 0.43 0.98 1
 -6 -24 2 0.32 0.97 2
 6 24 -2 -0.43 0.9 3
 5 -24 -2 1.51 1.06 1
 5 24 -2 -0.22 0.83 3
 -5 -24 2 2.34 1.1 2
 -4 -24 2 9.45 1.48 2
 4 24 -2 12.54 1.43 3
 4 -24 -2 14.24 1.61 1
 -3 -24 2 30.01 2.06 2
 3 -24 -2 33.72 2.15 1
 3 24 -2 30.73 1.96 3
 -2 -24 2 3.82 1.07 2
 2 -24 -2 3.74 1.03 1
 1 24 -2 33.31 2.1 2
 -1 -24 2 36.26 2.23 2
 1 -24 -2 30.38 1.88 1
 0 24 2 13.93 1.42 3
 0 24 -2 17.83 1.66 2
 1 24 2 2.58 1 3
 1 -24 2 1.89 0.94 1
 -1 24 -2 2.72 1.03 2
 2 -24 2 60.89 2.77 1
 2 24 2 60.28 2.7 3
 -2 24 -2 58.79 2.75 2
 -2 -24 -2 63.02 2.69 2
 3 -24 2 4.09 1.16 1
 -3 24 -2 2.78 1.17 2
 -3 -24 -2 2.89 1.05 2
 3 24 2 4.63 1.18 3
 -4 24 -2 27.8 2.14 2
 4 24 2 28.14 2.07 3
 -4 -24 -2 28.34 1.94 2
 4 -24 2 31.51 2.3 1
 -5 24 -2 17.52 1.81 2
 -5 -24 -2 14.07 1.56 2
 5 -24 2 15.18 1.71 1
 5 24 2 12.47 1.54 3
 6 24 2 9.65 1.52 3
 -6 -24 -2 5.05 1.28 2
 -6 24 -2 10.01 1.55 2
 6 -24 2 8.83 1.51 1
 -7 -24 -2 25.22 2.04 2
 7 -24 2 28.29 2.32 1
 7 24 2 32.96 2.37 3
 -6 -25 2 2.73 1.19 2
 6 25 -2 3.57 1.19 3
 6 -25 -2 3.37 1.2 1
 5 -25 -2 2.24 1.14 1
 -5 -25 2 5.48 1.35 2
 5 25 -2 3.33 1.18 3
 4 -25 -2 28.2 2.04 1
 4 25 -2 24.7 1.9 3
 -4 -25 2 23.89 2.08 2
 -3 -25 2 11.73 1.53 2
 3 25 -2 14.38 1.53 3
 3 -25 -2 16.42 1.65 1
 -2 -25 2 -0.88 0.88 2
 2 -25 -2 -0.29 0.68 1
 -1 -25 2 0.34 0.9 2
 0 25 -2 6.79 1.28 2
 1 25 2 11.66 1.45 3
 -1 25 -2 13.19 1.62 2
 2 25 2 0.64 0.94 3
 2 -25 2 1.24 0.98 1
 -2 25 -2 0.49 0.88 2
 -3 25 -2 4.98 1.23 2
 3 25 2 6.11 1.28 3
 3 -25 2 6.35 1.23 1
 -4 -25 -2 6.08 1.22 2
 4 -25 2 6.26 1.3 1
 -4 25 -2 6.43 1.42 2
 4 25 2 7.9 1.38 3
 -5 25 -2 11.05 1.64 2
 -5 -25 -2 10.48 1.52 2
 5 25 2 9.43 1.51 3
 5 -25 2 11.24 1.67 1
 6 -25 2 15.34 1.82 1
 -6 -25 -2 13.74 1.62 2
 6 25 2 12.37 1.71 3
 -5 -26 2 1.75 1.12 2
 5 -26 -2 2.92 1.16 1
 5 26 -2 3.34 1.18 3
 4 26 -2 3 1.13 3
 -4 -26 2 1.87 1.15 2
 4 -26 -2 2.88 1.12 1
 -3 -26 2 1.3 1.08 2
 3 -26 -2 1.05 0.86 1
 -2 -26 2 6.58 1.3 2
 2 -26 -2 5.23 1.13 1
 -1 -26 2 -0.13 0.82 2
 0 26 -2 0.48 0.97 2
 -1 26 -2 2.35 1.11 2
 2 -26 2 0.94 0.96 1
 -2 26 -2 -1.04 0.77 2
 2 26 2 -0.48 0.92 3
 3 26 2 18.42 1.79 3
 -3 26 -2 18.91 1.96 2
 3 -26 2 17.25 1.79 1
 4 -26 2 0.01 1.01 1
 4 26 2 -0.72 0.86 3
 3 -27 -2 6.03 1.27 1
 -3 -27 2 3.07 1.28 2
 -2 -27 2 0.51 0.97 2
 -1 -27 2 5.83 1.35 2
 0 27 -2 0.24 0.97 2
 0 -27 2 0.93 0.98 2
 -1 27 -2 22.08 2.02 2
 -2 27 -2 8.45 1.49 2
 2 27 2 10.29 1.48 3
 3 27 2 15.23 1.71 3
 3 -27 2 16.33 1.79 1
 -14 0 3 -0.21 0.96 2
 -13 0 3 -2.14 0.68 2
 13 0 -3 -1.12 0.88 3
 -12 0 3 -1.6 0.76 2
 12 0 -3 0.71 0.92 3
 11 0 -3 -0.43 0.69 3
 -11 0 3 0.08 0.74 2
 10 0 -3 0.56 0.67 3
 -10 0 3 0.41 0.68 2
 -9 0 3 0.99 0.69 2
 9 0 -3 -0.45 0.47 1
 9 0 -3 -0.35 0.67 3
 -8 0 3 0.26 0.62 2
 8 0 -3 -0.29 0.55 3
 8 0 -3 -0.55 0.47 1
 -7 0 3 -0.13 0.5 2
 7 0 -3 -0.34 0.51 3
 7 0 -3 -0.26 0.38 1
 -6 0 3 2.21 0.52 2
 6 0 -3 -0.02 0.35 1
 6 0 -3 -0.69 0.38 3
 5 0 -3 0.08 0.29 1
 5 0 -3 -0.13 0.4 3
 -5 0 3 0.18 0.37 2
 -4 0 3 -0.06 0.29 2
 4 0 -3 0.18 0.36 3
 4 0 -3 0.1 0.25 1
 3 0 -3 -0.03 0.22 1
 3 0 -3 0.25 0.31 3
 -3 0 3 0.09 0.25 2
 -2 0 3 -0.2 0.2 2
 2 0 -3 -0.11 0.28 3
 2 0 -3 0.01 0.21 1
 1 0 -3 0.15 0.27 3
 1 0 -3 -0.09 0.23 1
 0 0 3 0.21 0.16 3
 0 0 -3 0.12 0.18 1
 0 0 -3 -0.06 0.14 2
 -1 0 -3 -0.02 0.17 2
 1 0 3 -0.16 0.15 3
 -1 0 -3 0.3 0.21 1
 2 0 3 -0.17 0.21 3
 -2 0 -3 0.09 0.23 2
 -2 0 -3 -0.03 0.21 1
 3 0 3 0.06 0.25 1
 -3 0 -3 -0.58 0.23 2
 3 0 3 0.35 0.27 3
 4 0 3 0.17 0.3 3
 -4 0 -3 0.13 0.34 2
 4 0 3 0.23 0.31 1
 5 0 3 -0.38 0.31 3
 5 0 3 -0.15 0.34 1
 -5 0 -3 0.19 0.41 2
 6 0 3 -0.69 0.38 3
 6 0 3 0.42 0.47 1
 -6 0 -3 -0.05 0.45 2
 7 0 3 0.52 0.56 1
 7 0 3 -0.56 0.38 3
 -7 0 -3 -0.29 0.52 2
 8 0 3 0.46 0.6 1
 8 0 3 0.18 0.55 3
 -8 0 -3 -0.03 0.67 2
 -9 0 -3 0.09 0.68 2
 9 0 3 0.34 0.61 3
 9 0 3 -0.05 0.65 1
 -10 0 -3 0.34 0.79 2
 10 0 3 0.34 0.68 3
 -11 0 -3 0.16 0.74 2
 -12 0 -3 1.01 0.96 2
 -13 0 -3 0.16 0.95 2
 -14 0 -3 0.53 0.98 2
 -14 1 3 7.69 1.53 2
 14 1 -3 9.36 1.53 3
 -14 -1 3 8.71 1.56 2
 -13 -1 3 26.99 2.14 2
 13 -1 -3 21.52 1.85 3
 -13 1 3 21.08 1.89 2
 13 1 -3 20.86 1.87 3
 -12 1 3 44.68 2.44 2
 12 -1 -3 43.12 2.32 3
 -12 -1 3 43.31 2.46 2
 12 1 -3 46.72 2.4 3
 -11 1 3 15.23 1.48 2
 -11 -1 3 16.55 1.51 2
 11 -1 -3 15.06 1.44 3
 11 1 -3 15.08 1.39 3
 10 -1 -3 2.1 0.79 3
 10 1 -3 4.25 0.93 3
 -10 1 3 3.5 0.88 2
 -10 -1 3 3.45 0.9 2
 -9 -1 3 195.24 4.59 2
 9 -1 -3 192.36 3.96 1
 9 -1 -3 190.69 4.38 3
 -9 1 3 194.17 4.54 2
 9 1 -3 185.71 4.35 3
 8 -1 -3 65.58 2.24 3
 8 1 -3 72.02 1.83 1
 -8 1 3 66.14 2.27 2
 8 -1 -3 69.97 1.98 1
 8 1 -3 70.11 2.32 3
 -8 -1 3 68.46 2.34 2
 7 1 -3 115.17 2.38 1
 7 -1 -3 111.16 2.54 1
 7 -1 -3 112.94 2.83 3
 7 1 -3 108.9 2.79 3
 -7 1 3 113.88 2.88 2
 -7 -1 3 111.13 2.87 2
 6 -1 -3 216.32 4.17 3
 -6 1 3 212.5 4.17 2
 6 1 -3 211.7 3.7 1
 6 -1 -3 210.77 3.9 1
 -6 -1 3 213.52 4.22 2
 6 1 -3 209.13 4.13 3
 -5 -1 3 104.53 2.4 2
 5 -1 -3 103.21 2.2 1
 5 1 -3 98.54 2.01 1
 5 1 -3 103.54 2.39 3
 5 -1 -3 103.68 2.37 3
 -5 1 3 105.15 2.34 2
 4 -1 -3 2135.82 30.68 1
 4 -1 -3 2162.09 30.31 3
 -4 -1 3 2124.79 30.54 2
 -4 1 3 2112.45 30.46 2
 4 1 -3 2143.7 30.58 1
 4 1 -3 2075.66 30.27 3
 3 1 -3 320.98 4.91 1
 -3 -1 3 314.41 5.03 2
 -3 1 3 315.2 4.95 2
 3 -1 -3 312.39 5.01 1
 3 1 -3 301.87 5.05 3
 2 -1 -3 495.46 7.52 3
 2 1 -3 486.2 7.46 3
 2 -1 -3 501.35 7.56 1
 2 1 -3 494.16 7.49 1
 -2 1 3 503.13 7.37 2
 -2 -1 3 496.98 7.45 2
 1 1 -3 608.61 8.93 2
 -1 1 3 614.82 9.35 2
 -1 1 3 599.56 8.93 3
 1 -1 -3 614.52 9.09 1
 1 1 -3 591.78 8.87 3
 1 1 -3 606.97 9.06 1
 0 1 3 879.51 12.62 3
 0 1 -3 894.61 12.65 3
 0 1 -3 851.23 12.87 1
 0 1 -3 860.84 12.73 2
 0 -1 -3 871.05 12.91 1
 0 -1 -3 888.84 12.99 2
 1 1 3 1763.17 25.42 3
 -1 1 -3 1789.18 25.57 2
 1 -1 3 1754.53 25.7 3
 -1 -1 -3 1831.46 25.6 2
 -1 -1 -3 1777.23 25.8 1
 -1 1 -3 1790.2 25.78 1
 2 1 3 9.62 0.5 3
 -2 -1 -3 9.24 0.53 2
 2 -1 3 9.08 0.51 1
 -2 1 -3 10.63 0.58 2
 2 -1 3 8.74 0.39 3
 -2 -1 -3 11.34 0.55 1
 -3 1 -3 5.24 0.5 2
 3 -1 3 6.48 0.49 1
 3 -1 3 5.69 0.41 3
 3 1 3 5.8 0.45 3
 -3 -1 -3 5.09 0.49 2
 3 1 3 5.29 0.41 1
 4 1 3 281.37 4.72 1
 -4 1 -3 290.24 5.12 2
 4 1 3 285.93 4.67 3
 4 -1 3 282.96 4.52 3
 -4 -1 -3 285.43 5.07 2
 4 -1 3 285.35 4.83 1
 5 1 3 533.28 8.42 1
 5 1 3 548.37 8.37 3
 -5 -1 -3 536.95 8.91 2
 5 -1 3 542.48 8.21 3
 5 -1 3 533.57 8.57 1
 -5 1 -3 539.58 8.94 2
 -6 -1 -3 57.1 1.99 2
 6 -1 3 59.57 1.79 1
 6 1 3 61.91 1.71 3
 6 -1 3 61.45 1.62 3
 -6 1 -3 58.48 2 2
 6 1 3 55.38 1.63 1
 7 -1 3 11.6 0.95 1
 7 1 3 13.21 0.94 3
 7 1 3 13.09 1 1
 -7 -1 -3 11 1.03 2
 7 -1 3 11.34 0.86 3
 -8 1 -3 2.07 0.77 2
 8 1 3 1.79 0.65 3
 8 -1 3 1.1 0.73 1
 8 -1 3 0.95 0.55 3
 8 1 3 2.77 0.74 1
 -8 -1 -3 2.64 0.81 2
 9 1 3 13.29 1.06 1
 -9 -1 -3 10.96 1.27 2
 9 -1 3 14.01 1.18 1
 9 1 3 12.98 1.08 3
 9 -1 3 15.33 1.17 3
 -9 1 -3 14.26 1.36 2
 -10 -1 -3 27.52 1.88 2
 10 1 3 28.21 1.62 3
 -10 1 -3 26.71 1.84 2
 10 -1 3 26.64 1.64 1
 10 -1 3 29.91 1.58 3
 11 1 3 1.92 0.84 3
 -11 -1 -3 1.57 0.88 2
 -11 1 -3 0.94 0.86 2
 -12 1 -3 2.63 1.08 2
 -12 -1 -3 1.56 1.02 2
 -13 1 -3 5.06 1.32 2
 -13 -1 -3 4.9 1.43 2
 -14 -1 -3 4.59 1.43 2
 -14 1 -3 6.46 1.54 2
 -14 2 3 -0.49 0.93 2
 -14 -2 3 0.87 1.01 2
 14 2 -3 -0.27 1.04 3
 13 2 -3 43.08 2.48 3
 -13 -2 3 42.18 2.51 2
 -13 2 3 38.71 2.5 2
 13 -2 -3 39.48 2.35 3
 -12 2 3 -1.38 0.7 2
 12 -2 -3 -0.36 0.87 3
 -12 -2 3 -0.39 0.84 2
 12 2 -3 0.04 0.88 3
 11 2 -3 2.1 0.91 3
 11 -2 -3 2.88 0.88 3
 -11 -2 3 2.87 0.98 2
 -11 2 3 2.04 0.94 2
 10 -2 -3 1.81 0.79 3
 -10 -2 3 1.98 0.81 2
 10 2 -3 1.68 0.8 3
 10 -2 -3 1.87 0.66 1
 -10 2 3 1.6 0.75 2
 9 2 -3 143.61 3.7 3
 9 -2 -3 146.18 3.64 3
 -9 -2 3 144.8 3.84 2
 -9 2 3 146.94 3.78 2
 9 -2 -3 140.29 3.33 1
 8 2 -3 179.63 4.1 3
 8 -2 -3 181.58 3.85 1
 8 2 -3 183.86 3.43 1
 -8 -2 3 194.05 4.32 2
 8 -2 -3 185.26 4.1 3
 -8 2 3 187.96 4.24 2
 7 -2 -3 72.91 2.15 3
 -7 -2 3 72.81 2.27 2
 -7 2 3 71.06 2.16 2
 7 -2 -3 69.96 2 1
 7 2 -3 75.61 1.71 1
 7 2 -3 72.76 2.22 3
 -6 -2 3 423.42 7.14 2
 6 -2 -3 406.2 6.93 3
 -6 2 3 420.97 7.03 2
 6 -2 -3 410.23 6.86 1
 6 2 -3 404.15 6.99 3
 6 2 -3 405.39 6.43 1
 -5 2 3 61.4 1.69 2
 5 -2 -3 58.38 1.63 1
 5 -2 -3 63.64 1.77 3
 -5 -2 3 62.28 1.78 2
 5 2 -3 62.67 1.36 1
 -4 2 3 635.69 9.64 2
 4 2 -3 640.49 9.45 1
 4 2 -3 619.39 9.69 3
 4 -2 -3 633.83 9.72 3
 -4 -2 3 636.25 9.79 2
 4 -2 -3 632.43 9.73 1
 3 2 -3 12.66 0.5 1
 -3 2 3 12.05 0.56 2
 3 -2 -3 12.81 0.68 1
 3 2 -3 13.09 0.7 3
 3 -2 -3 15.13 0.75 3
 -3 -2 3 14.11 0.69 2
 -2 2 3 1.44 0.24 2
 2 2 -3 1.4 0.28 1
 2 -2 -3 1.41 0.33 3
 -2 -2 3 0.47 0.3 2
 1 2 -3 46.97 1.04 3
 1 2 -3 47.16 1.08 2
 1 2 -3 47.33 1.05 1
 0 2 3 8557.43 121.35 3
 0 2 -3 8595.43 121.62 3
 0 2 -3 8163.89 122.98 1
 0 2 -3 8586.72 122.28 2
 0 -2 -3 8656.94 123.92 1
 0 -2 -3 8427.26 126.79 2
 1 -2 3 262.12 4.22 1
 -1 -2 -3 263.51 4.07 2
 -1 -2 -3 257.12 4.21 1
 1 2 3 256.9 4.08 3
 -1 2 -3 260.62 4.24 2
 1 -2 3 257.09 3.99 3
 -2 -2 -3 337.74 5.37 2
 2 -2 3 333.96 5.4 1
 -2 2 -3 340.13 5.49 2
 2 -2 3 340.21 5.05 3
 -2 -2 -3 336.94 5.35 1
 2 2 3 334.53 5.24 3
 -3 2 -3 4.88 0.51 2
 3 2 3 3.88 0.43 3
 -3 -2 -3 3.27 0.43 2
 3 -2 3 3.24 0.28 3
 3 -2 3 2.9 0.4 1
 -3 -2 -3 4.06 0.38 1
 4 -2 3 9.46 0.71 1
 4 -2 3 10.74 0.54 3
 -4 -2 -3 9.92 0.74 2
 4 2 3 9.72 0.69 3
 4 2 3 9.57 0.57 1
 -4 2 -3 11 0.79 2
 -5 -2 -3 113.78 2.79 2
 5 -2 3 119.04 2.62 1
 -5 2 -3 119.52 2.87 2
 5 2 3 114.27 2.48 3
 5 -2 3 116.69 2.25 3
 5 2 3 113.83 2.34 1
 6 -2 3 42.62 1.54 1
 -6 2 -3 43.55 1.73 2
 6 -2 3 44.56 1.32 3
 6 2 3 44.37 1.5 3
 -6 -2 -3 44.01 1.71 2
 6 2 3 46.46 1.39 1
 7 2 3 37.8 1.49 3
 7 -2 3 37.67 1.33 3
 7 -2 3 37.7 1.59 1
 -7 -2 -3 37.24 1.76 2
 7 2 3 37.04 1.38 1
 8 2 3 117.16 2.75 1
 8 -2 3 111.04 3 1
 8 2 3 114.61 2.91 3
 -8 2 -3 112.54 3.35 2
 -8 -2 -3 110.77 3.32 2
 8 -2 3 114.27 2.7 3
 9 -2 3 22.43 1.48 1
 -9 2 -3 20.48 1.65 2
 9 2 3 22.87 1.39 3
 9 -2 3 23.1 1.29 3
 -9 -2 -3 22.09 1.6 2
 10 2 3 4.63 0.85 3
 -10 -2 -3 5.08 1.05 2
 10 -2 3 3.85 0.97 1
 -10 2 -3 3.62 0.98 2
 -11 2 -3 16.94 1.65 2
 -11 -2 -3 13.79 1.57 2
 11 2 3 15.06 1.33 3
 -12 2 -3 6.52 1.33 2
 -12 -2 -3 7.39 1.38 2
 -13 2 -3 -1.15 0.86 2
 -13 -2 -3 -1.26 0.84 2
 -14 -2 -3 -0.79 0.99 2
 -14 2 -3 1.17 1.12 2
 -14 3 3 0.99 1.05 2
 14 3 -3 2.27 1.25 3
 -14 -3 3 1.19 1.12 2
 -13 -3 3 0.38 1.02 2
 13 3 -3 0.86 1.03 3
 -13 3 3 -1.43 0.75 2
 12 -3 -3 9.6 1.3 3
 12 3 -3 8.53 1.32 3
 -12 -3 3 8.2 1.33 2
 -12 3 3 9.17 1.39 2
 -11 -3 3 5.82 1.16 2
 11 -3 -3 4.18 0.97 3
 -11 3 3 4.13 1.02 2
 11 3 -3 5.54 1.09 3
 10 -3 -3 9.45 0.96 1
 10 -3 -3 6.42 0.96 3
 -10 3 3 6.69 1.03 2
 10 3 -3 5.88 0.97 3
 -10 -3 3 7.24 1.09 2
 9 3 -3 0.22 0.69 3
 -9 3 3 -0.42 0.62 2
 9 -3 -3 0.7 0.66 3
 -9 -3 3 -0.74 0.58 2
 9 -3 -3 -0.04 0.56 1
 8 3 -3 24.09 1.45 3
 8 -3 -3 21.08 1.34 3
 8 -3 -3 21.19 1.25 1
 -8 3 3 23.88 1.43 2
 -8 -3 3 20.45 1.37 2
 -7 3 3 0.63 0.47 2
 -7 -3 3 0.33 0.51 2
 7 3 -3 0.78 0.31 1
 7 -3 -3 0.9 0.56 3
 7 -3 -3 0.38 0.45 1
 7 3 -3 0.62 0.5 3
 -6 -3 3 2.15 0.54 2
 6 -3 -3 3.75 0.58 1
 6 3 -3 2.87 0.33 1
 -6 3 3 3.07 0.52 2
 6 3 -3 3.69 0.58 3
 6 -3 -3 2.91 0.57 3
 -5 -3 3 129.16 2.85 2
 -5 3 3 125.82 2.68 2
 5 -3 -3 126.91 2.74 1
 5 -3 -3 130.02 2.79 3
 5 3 -3 125.54 2.79 3
 5 3 -3 128.36 2.24 1
 4 3 -3 266.63 4.7 3
 -4 -3 3 275.93 4.77 2
 4 3 -3 274.33 4.27 1
 4 -3 -3 273.22 4.72 1
 4 -3 -3 273.12 4.71 3
 -4 3 3 270.01 4.55 2
 -3 -3 3 207.77 3.67 2
 3 3 -3 206.01 3.32 1
 3 3 -3 209.77 3.65 3
 3 -3 -3 208.85 3.68 1
 3 -3 -3 210.26 3.68 3
 -2 3 3 842.9 12.37 3
 -2 3 3 833.69 12.28 2
 2 3 -3 840.64 12.39 1
 2 3 -3 833.22 12.27 3
 2 -3 -3 852.48 12.55 1
 -2 -3 3 848.16 12.43 2
 1 3 -3 64.82 1.22 1
 1 3 -3 54.95 1.28 2
 1 3 -3 50.71 1.16 3
 -1 3 3 51.22 0.99 2
 0 3 -3 9.87 0.53 2
 0 -3 -3 10.72 0.52 1
 0 3 -3 9.44 0.38 3
 0 -3 3 10 0.48 1
 0 3 3 10.33 0.54 3
 0 -3 -3 10.85 0.34 2
 -1 -3 -3 2964 42.85 1
 1 -3 3 2964.57 47.16 3
 1 3 3 2948.31 41.99 3
 -1 -3 -3 2907.56 43.14 2
 1 -3 3 2937.17 43.29 1
 -1 3 -3 3024.02 43.03 2
 -2 -3 -3 343.01 5.49 1
 2 3 3 353.67 5.46 3
 -2 -3 -3 353 5.52 2
 2 -3 3 345.94 5.58 1
 -2 3 -3 336.45 5.65 2
 -3 -3 -3 70.01 1.55 1
 3 -3 3 71.13 1.26 3
 -3 -3 -3 70.62 1.73 2
 3 -3 3 72.49 1.73 1
 -3 3 -3 73.38 1.86 2
 3 3 3 73.26 1.66 3
 4 -3 3 178.21 2.91 3
 4 3 3 179.35 3.33 3
 4 3 3 176.92 3.14 1
 4 -3 3 176.28 3.43 1
 -4 3 -3 180.69 3.63 2
 -4 -3 -3 176.1 3.52 2
 5 3 3 8.85 0.72 3
 -5 3 -3 7.31 0.76 2
 5 -3 3 8.78 0.56 3
 -5 -3 -3 8.82 0.79 2
 5 3 3 8.95 0.61 1
 5 -3 3 9.14 0.75 1
 6 3 3 15.34 0.94 3
 6 -3 3 17.56 0.82 3
 -6 -3 -3 16 1.1 2
 6 3 3 16.09 0.83 1
 -6 3 -3 16.42 1.13 2
 6 -3 3 16.29 1.12 1
 7 -3 3 186.54 4.04 1
 7 3 3 187.76 3.88 3
 -7 3 -3 182.19 4.31 2
 -7 -3 -3 183.91 4.29 2
 7 3 3 186.28 3.57 1
 7 -3 3 188.95 3.53 3
 8 3 3 70.74 2.26 3
 8 3 3 74.52 2.03 1
 8 -3 3 72.94 2.39 1
 -8 3 -3 73.2 2.64 2
 -8 -3 -3 75.12 2.64 2
 8 -3 3 74.14 2.05 3
 9 -3 3 35.03 1.79 1
 -9 -3 -3 31.37 1.86 2
 9 -3 3 34.54 1.48 3
 -9 3 -3 32.55 1.95 2
 9 3 3 34.45 1.68 3
 -10 -3 -3 22.33 1.7 2
 10 -3 3 24.53 1.65 1
 -10 3 -3 23.1 1.74 2
 10 3 3 24.69 1.56 3
 11 3 3 9.65 1.18 3
 -11 -3 -3 6.05 1.21 2
 -11 3 -3 8.24 1.34 2
 -12 -3 -3 19.11 1.87 2
 -12 3 -3 18.13 1.9 2
 12 3 3 21.22 1.68 3
 -13 -3 -3 17.31 1.91 2
 -13 3 -3 17.3 1.92 2
 -14 3 -3 4 1.43 2
 -14 -3 -3 1.48 1.12 2
 -14 -4 3 0.93 1.08 2
 -14 4 3 4.98 1.35 2
 14 4 -3 6.18 1.44 3
 13 4 -3 30.32 2.19 3
 -13 4 3 27.9 2.06 2
 -13 -4 3 26.99 2.1 2
 -12 -4 3 1.97 1.02 2
 -12 4 3 0.48 0.87 2
 12 4 -3 -0.07 0.84 3
 12 -4 -3 0.76 0.9 3
 11 -4 -3 4.17 0.98 3
 -11 -4 3 4.69 1.06 2
 11 4 -3 7.64 1.2 3
 11 -4 -3 4.66 0.87 1
 -11 4 3 4.41 1.06 2
 10 -4 -3 0.2 0.58 1
 -10 4 3 -0.35 0.64 2
 10 4 -3 -0.3 0.72 3
 10 -4 -3 0.61 0.71 3
 -10 -4 3 0.49 0.7 2
 -9 4 3 0.27 0.63 2
 -9 -4 3 0.57 0.66 2
 9 -4 -3 0.65 0.62 1
 9 4 -3 -0.52 0.67 3
 9 -4 -3 1.08 0.67 3
 -8 4 3 23.4 1.35 2
 8 4 -3 23.87 1.41 3
 8 -4 -3 25.03 1.4 3
 8 -4 -3 25.73 1.39 1
 -8 -4 3 21.97 1.41 2
 7 4 -3 16.08 1.16 3
 7 -4 -3 15.28 1.08 3
 -7 -4 3 16.58 1.15 2
 -7 4 3 17.84 1.12 2
 7 -4 -3 17 1.06 1
 7 4 -3 17.47 0.65 1
 -6 4 3 150.36 3.24 2
 6 -4 -3 148.47 3.27 1
 6 4 -3 149.73 3.33 3
 6 4 -3 155.21 2.58 1
 -6 -4 3 150.37 3.41 2
 6 -4 -3 155.86 3.29 3
 5 -4 -3 63.75 1.82 1
 5 4 -3 63.36 1.23 1
 5 -4 -3 64.49 1.8 3
 -5 -4 3 61.43 1.83 2
 -5 4 3 64.58 1.72 2
 -4 -4 3 84.85 2.06 2
 4 -4 -3 81.85 1.98 3
 4 4 -3 82.45 1.47 1
 -4 4 3 82.04 1.84 2
 4 -4 -3 82.87 2.03 1
 3 -4 -3 2643.02 38.78 1
 3 4 -3 2564.55 36.76 3
 -3 4 3 2626.24 37.04 2
 -3 4 3 2580.85 36.8 3
 3 4 -3 2616.03 37.77 1
 -3 -4 3 2585.31 37.19 2
 -2 4 3 50.66 1.33 3
 -2 4 3 53.27 1.09 2
 2 -4 -3 52.41 1.38 1
 2 4 -3 51.71 1.29 3
 2 4 -3 55.95 1.39 2
 2 4 -3 54 1.09 1
 -1 4 3 756.52 11.34 2
 1 4 -3 753.89 11.1 3
 -1 -4 3 768.71 11.28 1
 1 4 -3 752.83 11.39 2
 -1 4 3 782.2 11.3 3
 1 -4 -3 772.01 11.46 1
 0 -4 -3 1712.23 24.46 2
 0 4 3 1673.63 24.02 3
 0 -4 -3 1673.27 24.45 1
 0 4 -3 1670.05 24.2 3
 0 4 -3 1697.67 24.33 2
 0 -4 3 1711.27 24.41 1
 1 -4 3 82.4 1.75 1
 -1 -4 -3 82.55 1.72 1
 -1 4 -3 79.98 1.37 3
 1 4 3 84.54 1.76 3
 -1 -4 -3 83.14 1.61 2
 -1 4 -3 85.71 1.86 2
 -2 -4 -3 -0.02 0.21 1
 2 -4 3 -0.02 0.26 1
 -2 4 -3 0.26 0.26 2
 -2 -4 -3 0.17 0.25 2
 2 4 3 0.05 0.28 3
 -3 -4 -3 34.52 1.14 2
 3 -4 3 33.05 0.68 3
 -3 -4 -3 31.24 0.95 1
 3 4 3 33.63 1.14 3
 -3 4 -3 34.36 1.23 2
 3 -4 3 36.18 1.19 1
 4 -4 3 462.23 6.78 3
 -4 -4 -3 460.31 7.54 2
 -4 4 -3 458.92 7.67 2
 4 -4 3 451.71 7.51 1
 -4 -4 -3 454.17 7.09 1
 4 4 3 458.79 7.31 3
 -5 4 -3 87.81 2.46 2
 -5 -4 -3 91.08 2.4 2
 5 4 3 92.14 2.24 3
 5 -4 3 88.54 1.78 3
 5 4 3 91.25 1.9 1
 5 -4 3 90.49 2.34 1
 -6 4 -3 100.25 2.8 2
 6 -4 3 101.42 2.1 3
 6 4 3 102.11 2.52 3
 6 4 3 102.27 2.14 1
 6 -4 3 104.57 2.68 1
 -6 -4 -3 97.83 2.73 2
 -7 4 -3 85.31 2.69 2
 7 -4 3 85.11 2.56 1
 7 -4 3 85.89 2.03 3
 -7 -4 -3 84.08 2.65 2
 7 4 3 85.95 2.42 3
 7 4 3 84.64 2.02 1
 8 -4 3 41.54 1.89 1
 -8 -4 -3 36.56 1.94 2
 8 -4 3 37.79 1.4 3
 -8 4 -3 39.32 1.96 2
 8 4 3 39.37 1.73 3
 -9 -4 -3 0.11 0.66 2
 9 4 3 1.66 0.73 3
 -9 4 -3 1.47 0.81 2
 9 -4 3 1.1 0.75 1
 -10 -4 -3 28.25 1.91 2
 10 4 3 34.62 1.79 3
 10 -4 3 31 1.86 1
 -10 4 -3 28.86 1.91 2
 -11 -4 -3 10.5 1.41 2
 11 4 3 12.2 1.26 3
 11 -4 3 11.66 1.31 1
 -11 4 -3 10.96 1.45 2
 -12 -4 -3 34.76 2.35 2
 -12 4 -3 41.31 2.57 2
 12 4 3 37.87 2.13 3
 -13 -4 -3 0.76 1.04 2
 -13 4 -3 2.14 1.07 2
 -14 -4 -3 3.74 1.31 2
 -14 4 -3 3.46 1.42 2
 -14 -5 3 0.67 1.11 2
 14 5 -3 -0.25 1.05 3
 -14 5 3 1.11 1.06 2
 13 5 -3 1.34 1.07 3
 -13 -5 3 0.8 1 2
 -13 5 3 4.2 1.17 2
 -12 -5 3 -0.83 0.82 2
 12 5 -3 -0.75 0.83 3
 -12 5 3 -0.32 0.71 2
 -11 5 3 -1.16 0.58 2
 -11 -5 3 0.42 0.8 2
 11 -5 -3 0.81 0.71 1
 11 5 -3 -0.31 0.72 3
 11 -5 -3 0.2 0.73 3
 -10 -5 3 -0.5 0.72 2
 10 -5 -3 0.92 0.72 3
 10 -5 -3 -0.05 0.63 1
 -10 5 3 -0.42 0.61 2
 10 5 -3 -0.3 0.68 3
 9 -5 -3 29.32 1.62 1
 -9 -5 3 33.66 1.83 2
 -9 5 3 31.32 1.69 2
 9 5 -3 29.99 1.68 3
 9 -5 -3 31.33 1.67 3
 8 -5 -3 12.82 1.08 3
 8 5 -3 13.15 1.11 3
 -8 5 3 13.74 1.12 2
 -8 -5 3 11.24 1.16 2
 8 -5 -3 11.75 1.08 1
 -7 5 3 60.92 1.98 2
 7 5 -3 56.93 1.98 3
 7 -5 -3 56.8 1.94 1
 7 -5 -3 58.95 1.92 3
 -7 -5 3 58.48 2.07 2
 -6 5 3 7.57 0.72 2
 6 5 -3 7.72 0.31 1
 6 -5 -3 7.71 0.75 3
 6 5 -3 7.47 0.78 3
 -6 -5 3 6.43 0.74 2
 6 -5 -3 7.83 0.79 1
 5 5 -3 -0.1 0.36 3
 5 -5 -3 -0.06 0.38 3
 -5 -5 3 0.58 0.41 2
 5 -5 -3 0.53 0.4 1
 -5 5 3 0.27 0.33 2
 -4 5 3 502.36 7.8 2
 4 5 -3 511.22 7.64 1
 4 -5 -3 490 8.1 1
 4 5 -3 502.19 7.97 3
 -4 5 3 484.99 7.87 3
 -3 -5 3 165.67 3.22 2
 -3 5 3 167.58 3.15 3
 -3 5 3 163.48 2.91 2
 3 5 -3 171 3.16 3
 3 -5 -3 165.57 3.24 1
 -3 -5 3 163.67 2.64 1
 -2 5 3 15.63 0.76 3
 2 5 -3 15.42 0.79 2
 2 5 -3 18.2 0.76 3
 -2 5 3 16.12 0.58 2
 -2 -5 3 16.05 0.54 1
 -1 -5 3 3246.12 47.36 1
 1 5 -3 3220.8 46.1 2
 1 -5 -3 3301.83 47.64 1
 1 5 -3 3222.69 46.8 3
 -1 5 3 3235.98 46.68 2
 0 -5 3 5.39 0.48 1
 0 5 -3 3.86 0.45 2
 0 -5 -3 3.24 0.4 1
 0 -5 -3 4.91 0.34 2
 0 5 3 5.02 0.48 3
 0 5 -3 4.26 0.35 3
 -1 -5 -3 917.43 13.65 1
 -1 5 -3 929.77 13.77 2
 1 5 3 912.64 13.5 3
 1 -5 3 926.62 13.71 1
 -1 5 -3 906.38 13.38 3
 -1 -5 -3 935.08 13.46 2
 2 5 3 741.64 11.1 3
 -2 -5 -3 746.91 11.11 2
 2 -5 3 736.3 11.31 1
 -2 -5 -3 747.76 11.14 1
 -2 5 -3 736.31 11.36 2
 -3 5 -3 100.62 2.36 2
 3 5 3 99.92 2.21 3
 -3 -5 -3 96.47 2.19 2
 -3 -5 -3 96.01 1.96 1
 3 -5 3 97.83 2.28 1
 -4 5 -3 179.25 3.74 2
 -4 -5 -3 181.45 3.61 2
 4 -5 3 175.25 3.61 1
 4 5 3 183.6 3.51 3
 -4 -5 -3 178.46 3.15 1
 4 -5 3 180.41 2.86 3
 5 5 3 169.55 3.48 3
 5 -5 3 170.45 2.89 3
 5 -5 3 170.49 3.62 1
 -5 -5 -3 169.12 3.66 2
 -5 5 -3 170.19 3.77 2
 5 5 3 172.15 3.03 1
 6 -5 3 204.82 3.52 3
 -6 5 -3 203.21 4.45 2
 -6 -5 -3 199.5 4.34 2
 6 5 3 204.02 4.11 3
 6 5 3 209.84 3.58 1
 6 -5 3 198.72 4.26 1
 -7 5 -3 35.8 1.72 2
 -7 -5 -3 36.7 1.76 2
 7 -5 3 36.55 1.7 1
 7 -5 3 37.27 1.23 3
 7 5 3 34.75 1.2 1
 7 5 3 33.82 1.5 3
 8 -5 3 27.57 1.67 1
 -8 -5 -3 24.29 1.58 2
 -8 5 -3 25.45 1.61 2
 8 5 3 24.98 1.46 3
 -9 -5 -3 3.5 0.91 2
 9 -5 3 2.23 0.88 1
 9 5 3 2.13 0.71 3
 -9 5 -3 3.66 0.92 2
 -10 -5 -3 2.23 0.91 2
 -10 5 -3 1.01 0.77 2
 10 -5 3 1.52 0.88 1
 10 5 3 1.38 0.82 3
 11 5 3 44.84 2.19 3
 11 -5 3 41.68 2.2 1
 -11 5 -3 41.95 2.38 2
 -11 -5 -3 41.09 2.45 2
 -12 5 -3 3.39 1.25 2
 -12 -5 -3 1.8 1.04 2
 12 5 3 1.33 0.93 3
 -13 5 -3 1.52 1.18 2
 -13 -5 -3 -0.51 0.94 2
 -14 5 -3 2.52 1.32 2
 -14 -5 -3 3.17 1.29 2
 -14 -6 3 42.08 2.72 2
 14 6 -3 39.01 2.63 3
 -14 6 3 42.91 2.7 2
 -13 6 3 17.7 1.81 2
 13 6 -3 17.12 1.76 3
 -13 -6 3 18.97 1.9 2
 -12 6 3 12.3 1.45 2
 -12 -6 3 14.02 1.58 2
 12 6 -3 13.01 1.48 3
 11 -6 -3 99.23 3.14 1
 -11 6 3 96.17 3.32 2
 11 -6 -3 97.33 3.13 3
 11 6 -3 95.48 3.33 3
 -11 -6 3 100.68 3.54 2
 -10 -6 3 1.24 0.78 2
 -10 6 3 1.54 0.81 2
 10 -6 -3 1.14 0.78 3
 10 6 -3 0.64 0.8 3
 10 -6 -3 0.98 0.76 1
 -9 -6 3 75.84 2.78 2
 9 -6 -3 81.02 2.57 1
 9 -6 -3 72.65 2.45 3
 -9 6 3 75.68 2.59 2
 9 6 -3 74.73 2.67 3
 8 6 -3 24.66 1.45 3
 -8 -6 3 20.95 1.43 2
 8 -6 -3 19.86 1.28 3
 8 -6 -3 24.01 1.4 1
 -8 6 3 21.42 1.34 2
 7 -6 -3 2.66 0.74 1
 -7 -6 3 3.56 0.76 2
 -7 6 3 4.43 0.71 2
 7 -6 -3 3.71 0.69 3
 7 6 -3 4.08 0.72 3
 6 -6 -3 33.6 1.47 1
 -6 6 3 32.37 1.34 2
 6 -6 -3 33.82 1.37 3
 6 6 -3 38.61 1.52 3
 -5 6 3 0.03 0.33 2
 5 -6 -3 0.23 0.43 1
 -5 6 3 0.03 0.39 3
 5 6 -3 -0.11 0.41 3
 -5 -6 3 0.59 0.44 2
 -4 6 3 1148.79 16.81 2
 4 -6 -3 1142.99 17.28 1
 -4 -6 3 1132.36 17.13 2
 4 6 -3 1155.73 16.9 3
 -4 6 3 1117.47 16.79 3
 -3 6 3 691.99 10.39 2
 -3 -6 3 698.25 10.77 2
 3 -6 -3 700.12 10.87 1
 -3 -6 3 687.5 10.22 1
 -3 6 3 690.48 10.54 3
 3 6 -3 693.46 10.55 3
 2 6 -3 26.08 1.01 2
 2 6 -3 24.8 0.93 3
 -2 6 3 24.43 0.97 3
 -2 -6 3 25.52 0.72 1
 2 -6 -3 28.86 1.05 1
 -2 6 3 24.45 0.76 2
 1 6 -3 700.12 10.69 2
 -1 6 3 704.96 10.5 3
 1 6 -3 689.76 10.28 3
 -1 -6 3 700.46 10.42 1
 1 -6 -3 707.56 10.69 1
 -1 6 3 696.33 10.27 2
 0 6 -3 527.59 7.79 3
 0 6 3 527.95 8.13 3
 0 6 -3 540.97 8.33 2
 0 -6 -3 530.73 8.18 1
 0 -6 -3 521.79 7.88 2
 0 -6 3 522.5 8.11 1
 1 -6 3 160.4 3.05 1
 1 6 3 162.78 3.04 3
 -1 -6 -3 163.85 2.87 2
 -1 6 -3 164.77 3.18 2
 -1 6 -3 165.53 2.57 3
 -1 -6 -3 159.27 2.94 1
 -2 -6 -3 49.2 1.33 2
 2 6 3 52.76 1.45 3
 -2 -6 -3 47.67 1.25 1
 -2 6 -3 52.6 1.55 2
 2 -6 3 51.19 1.48 1
 3 6 3 284.45 4.98 3
 -3 -6 -3 285.69 4.73 1
 -3 6 -3 285.38 5.21 2
 -3 -6 -3 294.97 5.02 2
 3 -6 3 288.97 5.14 1
 -4 -6 -3 207.26 4.02 2
 -4 -6 -3 201.78 3.52 1
 -4 6 -3 206.81 4.18 2
 -4 6 -3 208.61 3.19 3
 4 6 3 198.3 3.89 3
 5 6 3 21.9 1.13 3
 5 -6 3 22.6 1.25 1
 -5 6 -3 20.67 1.19 2
 -5 -6 -3 22.03 1.18 2
 5 -6 3 22 0.72 3
 5 6 3 22.44 0.79 1
 6 6 3 270.34 4.43 1
 -6 6 -3 263.85 5.45 2
 6 -6 3 268.93 5.36 1
 -6 -6 -3 271.12 5.37 2
 6 -6 3 263.07 4.37 3
 6 6 3 269.48 5.1 3
 -7 -6 -3 45.91 1.93 2
 7 -6 3 41.21 1.86 1
 7 -6 3 43.45 1.31 3
 -7 6 -3 45.93 1.97 2
 7 6 3 43.22 1.77 3
 8 -6 3 70.5 2.56 1
 -8 6 -3 66.69 2.54 2
 8 6 3 66.79 2.3 3
 9 -6 3 -0.58 0.68 1
 -9 -6 -3 0.52 0.73 2
 9 6 3 0.05 0.63 3
 -9 6 -3 -0.24 0.64 2
 10 -6 3 76.59 2.88 1
 -10 -6 -3 83.27 3.14 2
 10 6 3 74.79 2.73 3
 -10 6 -3 75.88 3.03 2
 11 6 3 1.42 0.89 3
 -11 6 -3 1.9 1 2
 -11 -6 -3 3.39 1.09 2
 11 -6 3 2.44 0.91 1
 -12 6 -3 6.13 1.34 2
 12 6 3 5.25 1.13 3
 -12 -6 -3 4.26 1.18 2
 -13 -6 -3 24.92 2.19 2
 -13 6 -3 24.7 2.2 2
 13 6 3 31.93 2.21 3
 -14 -7 3 26.67 2.29 2
 14 7 -3 30.78 2.42 3
 -14 7 3 28.88 2.33 2
 13 7 -3 12.21 1.55 3
 -13 -7 3 10.12 1.54 2
 -13 7 3 13.74 1.61 2
 -12 -7 3 49.13 2.69 2
 12 7 -3 49.92 2.64 3
 12 -7 -3 47.85 2.32 1
 -12 7 3 48.76 2.46 2
 11 -7 -3 12.06 1.27 1
 -11 -7 3 9.93 1.34 2
 -11 7 3 10.32 1.3 2
 11 7 -3 12.82 1.45 3
 -10 7 3 76.13 2.78 2
 10 -7 -3 80.7 2.77 1
 10 -7 -3 80.15 2.67 3
 10 7 -3 80.14 2.92 3
 -10 -7 3 78.72 2.97 2
 9 7 -3 47.42 2.1 3
 9 -7 -3 43.45 1.87 3
 -9 -7 3 45.14 2.13 2
 9 -7 -3 42.81 1.95 1
 -9 7 3 51.81 2.1 2
 8 7 -3 37.11 1.76 3
 -8 7 3 30.54 1.56 2
 8 -7 -3 34.42 1.75 1
 8 -7 -3 33.05 1.56 3
 -7 -7 3 140.62 3.56 2
 -7 7 3 142.13 3.33 2
 -7 7 3 138.84 3.23 3
 7 7 -3 140.01 3.45 3
 7 -7 -3 138.6 3.47 1
 -6 7 3 0.92 0.47 3
 -6 7 3 0.28 0.4 2
 6 -7 -3 0.47 0.56 1
 6 7 -3 0.22 0.45 3
 -6 -7 3 -0.37 0.44 2
 -5 7 3 600.8 9.44 3
 -5 7 3 593.51 9.44 2
 -5 -7 3 589.08 9.74 2
 5 7 -3 602.64 9.6 3
 5 -7 -3 581.31 9.79 1
 -4 -7 3 83 2.19 2
 -4 7 3 82.57 1.94 2
 -4 7 3 78.92 2 3
 4 -7 -3 81.43 2.21 1
 -3 -7 3 1.34 0.41 2
 -3 7 3 1.48 0.33 2
 3 -7 -3 0.94 0.42 1
 3 7 -3 1.22 0.38 3
 -3 7 3 1.16 0.41 3
 -3 -7 3 1.49 0.25 1
 2 7 -3 0.72 0.32 3
 -2 7 3 2.76 0.46 3
 2 7 -3 1.5 0.4 2
 -2 7 3 1.86 0.3 2
 2 -7 -3 2.61 0.46 1
 -2 -7 3 2.62 0.33 1
 -1 7 3 1030.88 15.34 2
 1 -7 -3 1069.38 15.82 1
 1 7 -3 1061.81 15.32 3
 -1 7 3 1054.65 15.5 3
 1 7 -3 1069.09 15.81 2
 -1 -7 3 1060.95 15.56 1
 0 -7 -3 9.92 0.62 1
 0 7 -3 10.57 0.53 3
 0 7 3 9.67 0.7 3
 0 7 -3 11.88 0.73 2
 0 -7 3 13.17 0.73 1
 0 -7 -3 10.93 0.53 2
 -1 7 -3 331.23 5.67 2
 -1 7 -3 326.2 4.96 3
 1 -7 3 333.36 5.56 1
 1 7 3 338.71 5.51 3
 -1 -7 -3 327.99 5.39 1
 -1 -7 -3 324.54 5.29 2
 2 7 3 18.71 0.91 3
 -2 7 -3 18.47 0.94 2
 -2 7 -3 18.65 0.48 3
 -2 -7 -3 17.86 0.76 1
 -2 -7 -3 18.32 0.81 2
 2 -7 3 18.75 0.95 1
 3 7 3 17.53 0.95 3
 -3 -7 -3 15.81 0.7 1
 -3 7 -3 15.62 0.95 2
 3 -7 3 16.88 0.99 1
 -3 7 -3 16.59 0.4 3
 -3 -7 -3 16.82 0.9 2
 4 7 3 208.92 4.04 3
 -4 7 -3 211.19 4.29 2
 4 -7 3 202.02 4.17 1
 -4 -7 -3 206.23 3.58 1
 -4 7 -3 211.69 3.2 3
 -4 -7 -3 202.67 4.06 2
 -5 7 -3 41.43 1.67 2
 -5 7 -3 40.44 0.97 3
 5 -7 3 41.46 1.73 1
 -5 -7 -3 39.31 1.57 2
 -5 -7 -3 38.58 1.07 1
 5 7 3 42.1 1.59 3
 6 7 3 62.89 1.43 1
 -6 7 -3 59.32 1.41 3
 6 7 3 65.15 2.06 3
 -6 -7 -3 65.65 2.2 2
 -6 7 -3 61.14 2.2 2
 6 -7 3 63.7 2.28 1
 7 -7 3 72.91 2.55 1
 -7 7 -3 69.81 2.5 2
 7 7 3 68.32 2.29 3
 -7 -7 -3 72.36 2.46 2
 8 -7 3 37.75 1.91 1
 -8 -7 -3 34.41 1.85 2
 -8 7 -3 39.2 2.01 2
 8 7 3 32.95 1.67 3
 9 -7 3 10.75 1.23 1
 9 7 3 13.32 1.2 3
 -9 7 -3 11.01 1.25 2
 -9 -7 -3 13.4 1.36 2
 -10 7 -3 6.25 1.12 2
 10 -7 3 4.84 1.14 1
 -10 -7 -3 5.12 1.1 2
 10 7 3 5.8 1.04 3
 -11 -7 -3 -0.18 0.75 2
 11 -7 3 -0.26 0.81 1
 11 7 3 -0.07 0.78 3
 -11 7 -3 0.9 0.9 2
 12 -7 3 -0.23 0.92 1
 -12 7 -3 1.06 0.95 2
 12 7 3 0.56 0.91 3
 -12 -7 -3 1.11 1.03 2
 -13 7 -3 2.4 1.19 2
 -13 -7 -3 0.15 0.93 2
 13 7 3 0.76 1.01 3
 14 8 -3 4.21 1.43 3
 -14 -8 3 2.1 1.2 2
 -14 8 3 4.93 1.39 2
 13 8 -3 15.9 1.8 3
 -13 -8 3 13.43 1.74 2
 -13 8 3 16.54 1.76 2
 12 8 -3 1.2 0.93 3
 12 -8 -3 1.86 0.91 1
 -12 8 3 1.86 0.98 2
 -12 -8 3 1.76 1.04 2
 -11 -8 3 19.41 1.75 2
 11 -8 -3 20.14 1.62 1
 11 8 -3 22.93 1.72 3
 -11 8 3 19.01 1.6 2
 10 8 -3 2.3 0.91 3
 10 -8 -3 4.07 0.97 1
 -10 8 3 4.2 0.93 2
 -10 -8 3 2.99 0.94 2
 -10 8 3 4.07 0.86 3
 9 -8 -3 0.84 0.72 1
 -9 8 3 1.61 0.71 2
 -9 8 3 1.5 0.74 3
 -9 -8 3 1.49 0.81 2
 9 8 -3 2.11 0.82 3
 8 8 -3 60.33 2.3 3
 8 -8 -3 52.46 2.14 1
 -8 8 3 51.93 2.03 2
 -8 8 3 58.41 2.03 3
 -8 -8 3 54.05 2.23 2
 7 -8 -3 32.88 1.67 1
 -7 8 3 34.68 1.54 2
 7 8 -3 34.02 1.63 3
 -7 8 3 33.42 1.52 3
 -6 -8 3 78.47 2.41 2
 -6 8 3 77.6 2.19 2
 6 8 -3 79.34 2.35 3
 6 -8 -3 74.76 2.38 1
 -6 8 3 75.92 2.15 3
 -5 8 3 2.28 0.52 3
 -5 8 3 1.44 0.47 2
 -5 -8 3 1.46 0.55 2
 5 -8 -3 1.34 0.57 1
 5 8 -3 1.27 0.52 3
 4 8 -3 87.43 2.24 3
 4 -8 -3 85.2 2.35 1
 -4 8 3 84.82 2.15 3
 -4 -8 3 89.56 2.38 2
 -4 8 3 87.84 2.07 2
 3 8 -3 105.15 2.42 3
 -3 8 3 109.59 2.43 3
 3 -8 -3 111.91 2.65 1
 -3 -8 3 104.16 2.55 2
 -3 -8 3 113.49 1.98 1
 -3 8 3 110.56 2.28 2
 2 8 -3 244.67 4.24 3
 -2 8 3 236.97 4.05 2
 -2 8 3 238.23 4.27 3
 2 8 -3 244.2 4.5 2
 2 -8 -3 244.21 4.49 1
 -2 -8 3 243.14 3.99 1
 -1 -8 3 204.32 3.54 1
 1 -8 -3 201.54 3.77 1
 1 8 -3 195.54 3.5 3
 -1 8 3 202.18 3.69 3
 -1 8 3 200.63 3.43 2
 0 -8 3 570.39 8.85 1
 0 8 3 572.53 8.83 3
 0 -8 -3 572.67 8.88 1
 0 8 3 565.34 8.6 2
 0 8 -3 570.08 9.08 2
 0 8 -3 550.48 8.43 3
 1 -8 3 3.91 0.53 1
 -1 8 -3 3.84 0.34 3
 1 8 3 2.95 0.5 3
 -1 8 -3 4.01 0.56 2
 -1 -8 -3 2.58 0.39 1
 -1 -8 -3 3.49 0.43 2
 -2 -8 -3 63.79 1.65 2
 -2 -8 -3 63.08 1.55 1
 -2 8 -3 61.27 1.85 2
 2 8 3 61.91 1.76 3
 -2 8 -3 63.09 1.19 3
 2 -8 3 59.87 1.78 1
 3 8 3 196.41 3.84 3
 -3 -8 -3 194.35 3.48 1
 -3 -8 -3 195.51 3.79 2
 3 -8 3 195.97 3.97 1
 -3 8 -3 201.02 3.01 3
 -3 8 -3 187.38 3.97 2
 -4 8 -3 8.09 0.79 2
 -4 -8 -3 8.54 0.55 1
 -4 -8 -3 8.15 0.74 2
 4 8 3 7.68 0.76 3
 -4 8 -3 7.69 0.36 3
 4 -8 3 7.71 0.85 1
 -5 -8 -3 8.93 0.56 1
 5 -8 3 8.5 0.95 1
 -5 8 -3 9.07 0.9 2
 -5 -8 -3 9.5 0.87 2
 -5 8 -3 9.06 0.47 3
 5 8 3 8.99 0.85 3
 -6 8 -3 3.31 0.74 2
 6 -8 3 2.25 0.77 1
 -6 -8 -3 1.74 0.63 2
 6 8 3 3.1 0.72 3
 -7 8 -3 15.51 1.26 2
 7 -8 3 13.56 1.32 1
 7 8 3 15.15 1.19 3
 -7 -8 -3 14.83 1.24 2
 8 8 3 -0.29 0.57 3
 -8 8 -3 -0.58 0.65 2
 -8 -8 -3 -0.97 0.6 2
 8 -8 3 0.17 0.74 1
 9 8 3 0.4 0.69 3
 -9 8 -3 0.79 0.81 2
 9 -8 3 0.93 0.9 1
 -9 -8 -3 0.55 0.8 2
 10 8 3 13.08 1.3 3
 -10 -8 -3 12.65 1.43 2
 10 -8 3 12.81 1.4 1
 -10 8 -3 14.11 1.5 2
 11 8 3 13.32 1.42 3
 -11 8 -3 14.25 1.67 2
 11 -8 3 13.82 1.51 1
 -11 -8 -3 16.52 1.68 2
 12 8 3 1.17 1.01 3
 -12 8 -3 1.25 1.05 2
 -12 -8 -3 3.41 1.18 2
 12 -8 3 3.03 1.16 1
 -13 8 -3 19.87 2.07 2
 -13 -8 -3 20.48 2.13 2
 13 8 3 23.3 1.96 3
 -14 -9 3 -0.41 1.05 2
 14 9 -3 1.08 1.17 3
 -13 -9 3 1.28 1.09 2
 13 9 -3 0.22 0.96 3
 -13 9 3 1.39 1.06 2
 12 -9 -3 0.8 0.91 1
 -12 9 3 0.58 0.78 2
 -12 -9 3 -0.53 0.79 2
 12 9 -3 -0.24 0.88 3
 11 -9 -3 -0.06 0.73 1
 11 9 -3 1.28 0.91 3
 -11 -9 3 0.41 0.8 2
 -11 9 3 -0.69 0.65 2
 10 9 -3 8.83 1.18 3
 -10 -9 3 11.02 1.36 2
 -10 9 3 8.21 1.11 2
 10 -9 -3 9.45 1.24 1
 9 -9 -3 10.53 1.17 1
 -9 -9 3 8.51 1.15 2
 9 9 -3 10.2 1.17 3
 -9 9 3 12.24 1.13 3
 -9 9 3 10 1.1 2
 -8 9 3 101.97 2.78 3
 8 -9 -3 99.42 3.11 1
 8 9 -3 99.77 3.04 3
 -8 -9 3 101.78 3.15 2
 -8 9 3 101.39 2.93 2
 7 9 -3 51.78 2.05 3
 -7 9 3 48.83 1.84 2
 -7 9 3 46.89 1.74 3
 7 -9 -3 49.68 2.05 1
 6 9 -3 14.35 1.12 3
 -6 -9 3 15.12 1.23 2
 -6 9 3 16.03 1.03 2
 6 -9 -3 16.55 1.32 1
 -6 9 3 14.78 1.01 3
 5 9 -3 38.84 1.55 3
 -5 9 3 37.46 1.4 2
 5 -9 -3 35.23 1.61 1
 -5 9 3 36.03 1.4 3
 -5 -9 3 38.88 1.62 2
 -4 9 3 611.16 9.67 3
 4 9 -3 615.44 9.82 3
 -4 -9 3 633.85 9.15 1
 -4 -9 3 604.22 10.05 2
 4 -9 -3 606.51 10.14 1
 -4 9 3 608.03 9.64 2
 3 -9 -3 165.38 3.55 1
 -3 9 3 162.83 3.28 3
 -3 9 3 164.86 3.14 2
 -3 -9 3 163.59 3.5 2
 -3 -9 3 160.37 2.8 1
 3 9 -3 163.85 3.32 3
 -2 -9 3 233.23 3.97 1
 -2 9 3 231.74 4.23 3
 2 -9 -3 234.66 4.45 1
 2 9 -3 234.26 4.48 2
 2 9 -3 237.48 4.21 3
 -2 9 3 232.31 4.03 2
 -1 9 3 197.13 3.72 3
 -1 -9 3 193.26 3.57 1
 1 -9 -3 194.22 3.78 1
 1 9 -3 199.34 3.54 3
 1 9 -3 204.3 3.94 2
 -1 9 3 197.84 3.48 2
 0 9 -3 159.28 2.85 3
 0 -9 -3 157.19 3.12 1
 0 9 3 159.92 3.17 3
 0 -9 3 158.2 3.13 1
 0 9 -3 158.51 3.34 2
 0 9 3 159.05 2.94 2
 1 -9 3 265.19 4.78 1
 -1 -9 -3 262.69 4.52 2
 -1 9 -3 262.4 4.18 3
 -1 9 -3 267.86 4.92 2
 -1 -9 -3 259.47 4.56 1
 2 9 3 32.79 1.29 3
 2 -9 3 29.86 1.32 1
 -2 -9 -3 33.74 1.1 1
 -2 -9 -3 30.76 1.16 2
 -2 9 -3 32.61 0.83 3
 -2 9 -3 32.23 1.32 2
 3 -9 3 19.73 1.18 1
 -3 9 -3 21.54 1.15 2
 3 9 3 22.16 1.13 3
 -3 -9 -3 21.71 0.87 1
 -3 -9 -3 19.05 1.02 2
 -3 9 -3 21.53 0.6 3
 -4 9 -3 1.1 0.51 2
 4 -9 3 1.73 0.64 1
 -4 -9 -3 1.65 0.35 1
 -4 9 -3 1.68 0.25 3
 -4 -9 -3 1.5 0.5 2
 4 9 3 2.29 0.61 3
 5 -9 3 279.44 5.63 1
 -5 9 -3 276.69 5.58 2
 5 9 3 273.65 5.32 3
 -5 -9 -3 275.98 5.41 2
 -5 -9 -3 284.13 4.58 1
 -6 -9 -3 14.58 1.17 2
 6 -9 3 14.72 1.24 1
 -6 9 -3 16.33 1.23 2
 6 9 3 14.99 1.16 3
 -7 -9 -3 -0.77 0.57 2
 -7 9 -3 0.16 0.58 2
 7 9 3 0.56 0.61 3
 7 -9 3 0.18 0.74 1
 8 9 3 173.97 4.2 3
 8 -9 3 168.04 4.41 1
 -8 -9 -3 161.58 4.3 2
 -8 9 -3 169.76 4.47 2
 -9 9 -3 12.04 1.33 2
 9 9 3 12.5 1.22 3
 -9 -9 -3 11.67 1.33 2
 9 -9 3 9.91 1.28 1
 -10 -9 -3 16.61 1.59 2
 10 9 3 15.86 1.49 3
 10 -9 3 17.45 1.59 1
 -10 9 -3 19.12 1.68 2
 -11 9 -3 19.74 1.85 2
 11 9 3 19.17 1.62 3
 11 -9 3 20.84 1.85 1
 -11 -9 -3 20.37 1.84 2
 12 9 3 0.89 0.95 3
 -12 9 -3 0.21 0.85 2
 12 -9 3 -0.92 0.92 1
 -12 -9 -3 0.27 0.92 2
 13 9 3 21.14 1.9 3
 -13 -9 -3 20.92 2.12 2
 -13 9 -3 20.3 2.09 2
 13 -10 -3 1.9 1.04 1
 -13 -10 3 1.54 1.09 2
 13 10 -3 1.85 1.19 3
 -12 -10 3 1.58 1 2
 12 10 -3 2.08 1.02 3
 12 -10 -3 2.09 1.03 1
 -12 10 3 2.46 1.03 2
 11 -10 -3 0.5 0.78 1
 -11 10 3 -0.06 0.76 2
 -11 -10 3 1.32 0.92 2
 11 10 -3 -0.05 0.85 3
 10 -10 -3 10.85 1.26 1
 10 10 -3 8.9 1.2 3
 -10 -10 3 7.65 1.21 2
 -10 10 3 10.39 1.21 2
 -9 10 3 2.98 0.81 2
 -9 -10 3 3.47 0.94 2
 9 -10 -3 1.79 0.86 1
 9 10 -3 1.89 0.8 3
 8 -10 -3 13.96 1.28 1
 -8 10 3 13.23 1.12 2
 8 10 -3 13.65 1.28 3
 -8 10 3 15.22 1.2 3
 -8 -10 3 11.18 1.18 2
 7 -10 -3 23.38 1.54 1
 -7 10 3 24.46 1.31 3
 -7 10 3 24.61 1.37 2
 7 10 -3 24.83 1.5 3
 -6 10 3 38.89 1.53 3
 6 -10 -3 35.75 1.81 1
 -6 -10 3 37.6 1.75 2
 6 10 -3 38.82 1.76 3
 -6 10 3 39.54 1.58 2
 -5 10 3 164.53 3.48 2
 -5 10 3 163.6 3.46 3
 -5 -10 3 160.8 3.77 2
 5 -10 -3 158.93 3.82 1
 5 10 -3 164.79 3.66 3
 4 -10 -3 109.53 2.92 1
 -4 10 3 112.42 2.59 2
 -4 10 3 116.09 2.66 3
 4 10 -3 112.25 2.76 3
 -4 -10 3 119.31 2.96 2
 -4 -10 3 116.46 1.96 1
 3 10 -3 118.74 2.71 3
 -3 10 3 116.53 2.52 2
 3 -10 -3 119.67 2.92 1
 -3 10 3 115.24 2.63 3
 -3 -10 3 114.88 2.2 1
 -3 -10 3 114.51 2.85 2
 -2 10 3 292.64 5.01 2
 -2 10 3 297.67 5.2 3
 2 -10 -3 301.73 5.47 1
 -2 -10 3 293.59 4.95 1
 2 10 -3 291.06 5.45 2
 2 10 -3 303.04 5.18 3
 -1 10 3 238.2 4.18 2
 -1 10 3 239.36 4.42 3
 1 10 -3 243.57 4.66 2
 1 -10 -3 242.07 4.54 1
 1 10 -3 242.06 4.23 3
 -1 -10 3 249.37 4.36 1
 0 10 -3 172.12 3.13 3
 0 10 3 175.82 3.48 3
 0 -10 3 174.91 3.47 1
 0 -10 -3 176.6 3.44 1
 0 10 -3 167.34 3.6 2
 0 10 3 170.88 3.23 2
 1 -10 3 209.6 4.08 1
 1 10 3 202.93 3.94 3
 -1 10 -3 205.01 3.45 3
 -1 10 -3 202.51 4.13 2
 -1 -10 -3 204.27 3.78 1
 -1 -10 -3 200.13 3.75 2
 -2 -10 -3 22.59 0.92 1
 2 -10 3 24.58 1.3 1
 -2 -10 -3 22.6 1.01 2
 -2 10 -3 21.52 1.15 2
 2 10 3 20.8 1.1 3
 -2 10 -3 22.56 0.74 3
 -3 -10 -3 17.34 1.01 2
 -3 10 -3 17.47 1.08 2
 3 10 3 15.86 1.04 3
 3 -10 3 17.68 1.21 1
 -3 10 -3 15.8 0.58 3
 -3 -10 -3 15.96 0.8 1
 -4 10 -3 0.47 0.48 2
 -4 10 -3 0.11 0.24 3
 4 10 3 0.19 0.52 3
 -4 -10 -3 0.01 0.31 1
 4 -10 3 -0.31 0.56 1
 -4 -10 -3 0.66 0.48 2
 -5 10 -3 59.04 2.14 2
 5 10 3 57.98 2.04 3
 -5 -10 -3 58.15 1.42 1
 -5 -10 -3 58.82 2.03 2
 5 -10 3 57.03 2.22 1
 -6 10 -3 9.85 1.04 2
 6 10 3 10.42 1.02 3
 6 -10 3 7.7 1.07 1
 -6 -10 -3 7.67 0.98 2
 -7 -10 -3 60.55 2.35 2
 7 10 3 65.9 2.38 3
 7 -10 3 62.29 2.53 1
 -7 10 -3 65.33 2.53 2
 8 10 3 9.07 1.08 3
 8 -10 3 7.07 1.21 1
 -8 -10 -3 6.94 1.08 2
 -8 10 -3 7.63 1.12 2
 -9 -10 -3 3.22 0.96 2
 9 -10 3 3.4 1.14 1
 9 10 3 4.66 0.96 3
 -9 10 -3 3.12 0.93 2
 10 10 3 7.1 1.14 3
 -10 10 -3 9.34 1.37 2
 10 -10 3 7.7 1.27 1
 -10 -10 -3 10.18 1.38 2
 -11 -10 -3 5.49 1.29 2
 11 10 3 4.51 1.17 3
 -11 10 -3 5.12 1.25 2
 11 -10 3 3.49 1.15 1
 -12 10 -3 7.1 1.44 2
 12 10 3 6.91 1.28 3
 -12 -10 -3 5.74 1.38 2
 12 -10 3 6.55 1.45 1
 -13 10 -3 0.01 1.01 2
 -13 -10 -3 -0.18 0.98 2
 13 -10 3 0.78 1.13 1
 13 10 3 0.24 1 3
 -13 -11 3 9.13 1.59 2
 13 -11 -3 12.52 1.56 1
 13 11 -3 12.91 1.66 3
 12 -11 -3 4.43 1.17 1
 -12 -11 3 4.04 1.25 2
 12 11 -3 3.73 1.18 3
 -12 11 3 1.18 0.97 2
 -11 11 3 -0.72 0.69 2
 11 11 -3 0.63 0.85 3
 11 -11 -3 -0.12 0.79 1
 -11 -11 3 0.41 0.89 2
 -10 11 3 0.96 0.78 2
 10 -11 -3 1.17 0.89 1
 10 11 -3 0.92 0.79 3
 -10 -11 3 1.36 0.86 2
 9 11 -3 -0.01 0.72 3
 -9 -11 3 0.15 0.77 2
 -9 11 3 0.33 0.65 2
 9 -11 -3 -0.21 0.69 1
 -8 11 3 28.82 1.58 2
 -8 11 3 26.55 1.45 3
 -8 -11 3 26.46 1.7 2
 8 11 -3 27.03 1.69 3
 8 -11 -3 29.06 1.77 1
 -7 11 3 47.05 1.76 3
 7 11 -3 49.3 2.1 3
 -7 -11 3 44.93 2.04 2
 7 -11 -3 49.71 2.15 1
 -7 11 3 44.24 1.83 2
 -6 -11 3 5.11 0.92 2
 6 -11 -3 5.18 0.93 1
 -6 11 3 7.27 0.82 2
 -6 11 3 7.69 0.82 3
 6 11 -3 6.55 0.88 3
 -5 -11 3 31.07 1.55 2
 -5 11 3 29.67 1.32 2
 5 -11 -3 28.23 1.56 1
 -5 11 3 27.93 1.3 3
 5 11 -3 30.66 1.47 3
 4 -11 -3 339.81 6.43 1
 -4 11 3 340.39 5.94 2
 -4 -11 3 337.75 6.37 2
 -4 -11 3 337.68 5.21 1
 -4 11 3 336.26 5.94 3
 4 11 -3 338.02 6.13 3
 -3 -11 3 197.48 4.2 2
 -3 -11 3 204.02 3.49 1
 -3 11 3 200.34 3.81 2
 -3 11 3 203.91 3.93 3
 3 -11 -3 194.11 4.23 1
 3 11 -3 195.04 3.95 3
 -2 11 3 7.45 0.71 3
 2 11 -3 6.46 0.74 2
 2 11 -3 7.27 0.66 3
 -2 -11 3 7.77 0.65 1
 2 -11 -3 7.78 0.78 1
 -2 11 3 7.36 0.6 2
 -1 11 3 6.76 0.71 3
 1 -11 -3 7.28 0.71 1
 1 11 -3 7.11 0.65 3
 -1 11 3 6.07 0.57 2
 -1 -11 3 6.99 0.69 1
 1 11 -3 6.47 0.74 2
 0 11 -3 807.36 12 3
 0 11 -3 794.37 12.73 2
 0 -11 -3 785.98 12.47 1
 0 -11 3 819.71 12.59 1
 0 11 3 801.03 12.38 3
 0 11 3 825.91 12.27 2
 -1 -11 -3 2.69 0.47 2
 1 -11 3 1.67 0.62 1
 -1 11 -3 2.85 0.41 3
 -1 -11 -3 1.73 0.44 1
 1 11 3 1.65 0.52 3
 -1 11 -3 1.95 0.54 2
 2 -11 3 51.12 1.87 1
 2 11 3 56.52 1.84 3
 -2 -11 -3 58.14 1.72 2
 -2 -11 -3 55.09 1.55 1
 -2 11 -3 55.66 1.9 2
 -2 11 -3 57.71 1.33 3
 -3 11 -3 32.26 0.89 3
 -3 11 -3 33.47 1.51 2
 -3 -11 -3 32.24 1.38 2
 -3 -11 -3 30.84 1.13 1
 3 11 3 32.21 1.45 3
 -4 -11 -3 11.75 0.7 1
 -4 -11 -3 10.9 0.95 2
 -4 11 -3 10.59 0.99 2
 4 11 3 11.33 0.99 3
 4 -11 3 10.82 1.16 1
 -5 11 -3 89.94 2.77 2
 5 11 3 90.62 2.71 3
 -5 -11 -3 90.57 2.65 2
 5 -11 3 91.06 2.9 1
 -6 11 -3 101.53 3.12 2
 6 -11 3 108.74 3.33 1
 6 11 3 102.8 2.99 3
 -6 -11 -3 106.32 3.08 2
 -7 11 -3 6.77 1.02 2
 7 11 3 8.37 1.03 3
 -7 -11 -3 7.38 1.02 2
 7 -11 3 6.63 1.1 1
 -8 -11 -3 4.18 0.96 2
 8 -11 3 4.25 1.01 1
 -8 11 -3 3.5 0.91 2
 8 11 3 3.94 0.95 3
 -9 -11 -3 3.08 0.95 2
 9 -11 3 2.31 1 1
 9 11 3 5.15 1.02 3
 -9 11 -3 3.34 0.99 2
 -10 -11 -3 6.48 1.21 2
 10 11 3 5.31 1.12 3
 -10 11 -3 2.67 1 2
 10 -11 3 2.97 1.06 1
 11 11 3 30.08 2.08 3
 11 -11 3 29.71 2.25 1
 -11 -11 -3 27.21 2.07 2
 -11 11 -3 31.13 2.26 2
 -12 -11 -3 3.29 1.2 2
 12 -11 3 3.93 1.26 1
 -12 11 -3 0.83 1.07 2
 12 11 3 1.38 1.04 3
 13 -11 3 1.89 1.21 1
 13 11 3 3.77 1.27 3
 -13 -11 -3 3.64 1.3 2
 -13 11 -3 -0.37 1.09 2
 -13 -12 3 1.04 1.12 2
 13 -12 -3 -0.41 0.89 1
 13 12 -3 -0.34 0.96 3
 12 -12 -3 0.97 0.91 1
 12 12 -3 -0.34 0.99 3
 -12 -12 3 0.92 1.05 2
 11 -12 -3 5.14 1.15 1
 -11 12 3 3.58 1.04 2
 -11 -12 3 3 1.16 2
 11 12 -3 4.11 1.12 3
 -10 12 3 1.41 0.78 2
 10 12 -3 0.82 0.8 3
 -10 -12 3 0.26 0.82 2
 10 -12 -3 -0.22 0.81 1
 9 12 -3 2.6 0.93 3
 -9 -12 3 3.91 1.04 2
 -9 12 3 2.02 0.81 2
 9 -12 -3 4.91 1.07 1
 -8 -12 3 0.29 0.74 2
 8 12 -3 -0.62 0.71 3
 8 -12 -3 0.62 0.83 1
 -8 12 3 -1.06 0.55 2
 7 12 -3 0.63 0.73 3
 -7 12 3 0.83 0.63 2
 7 -12 -3 0.06 0.67 1
 -7 12 3 0.78 0.58 3
 -7 -12 3 0.03 0.64 2
 -6 12 3 9.41 0.88 3
 6 -12 -3 8 1.06 1
 6 12 -3 8.55 0.99 3
 -6 12 3 7.45 0.86 2
 -6 -12 3 7.2 0.99 2
 -5 12 3 2.6 0.61 2
 5 -12 -3 2.72 0.76 1
 5 12 -3 2.21 0.67 3
 -5 12 3 1.95 0.59 3
 -5 -12 3 3.45 0.78 2
 -4 12 3 124.43 2.9 3
 4 12 -3 123.7 3.07 3
 -4 12 3 123.59 2.88 2
 -4 -12 3 124.65 2.25 1
 -4 -12 3 122.88 3.24 2
 4 -12 -3 122.91 3.26 1
 -3 12 3 19.69 1.02 2
 -3 -12 3 22.61 1.33 2
 -3 12 3 22.55 1.15 3
 3 12 -3 24.03 1.2 3
 -3 -12 3 22.14 0.94 1
 3 -12 -3 19.95 1.35 1
 2 12 -3 27.36 1.38 2
 -2 12 3 25.81 1.08 2
 -2 -12 3 29.64 1.16 1
 -2 12 3 25.53 1.22 3
 2 -12 -3 22.75 1.27 1
 2 12 -3 27.13 1.22 3
 1 -12 -3 0.27 0.46 1
 1 12 -3 0.36 0.45 2
 -1 -12 3 0.12 0.46 1
 -1 12 3 -0.14 0.32 2
 1 12 -3 0.32 0.4 3
 -1 12 3 0.3 0.47 3
 0 12 3 60.8 1.71 2
 0 12 3 59.1 1.86 3
 0 -12 -3 59.65 1.79 1
 0 12 -3 58.03 1.6 3
 0 -12 3 59.4 1.9 1
 0 12 -3 62.66 2.04 2
 -1 12 -3 85.2 2.45 2
 -1 12 -3 81.4 1.86 3
 1 12 3 83.76 2.29 3
 -1 -12 -3 79.03 2.08 1
 -1 -12 -3 84.75 2.14 2
 1 -12 3 80.9 2.38 1
 -2 12 -3 218.86 3.69 3
 2 12 3 224.63 4.44 3
 -2 12 -3 224.54 4.62 2
 2 -12 3 216.64 4.59 1
 -2 -12 -3 209.96 4.22 2
 -2 -12 -3 215.11 4.06 1
 -3 12 -3 368.72 5.66 3
 -3 12 -3 366.13 6.85 2
 3 12 3 369.56 6.63 3
 3 -12 3 361.29 6.89 1
 -3 -12 -3 357.11 6.5 2
 -3 -12 -3 372.63 6.18 1
 -4 -12 -3 55.19 1.97 2
 4 -12 3 58.42 2.25 1
 -4 12 -3 52.17 2.06 2
 4 12 3 53.51 2.04 3
 -4 -12 -3 57.96 1.57 1
 5 12 3 84.92 2.67 3
 -5 12 -3 82.78 2.7 2
 5 -12 3 83.2 2.83 1
 -5 -12 -3 85.13 2.63 2
 -6 12 -3 6.46 0.99 2
 6 12 3 5.64 0.98 3
 -6 -12 -3 6.35 0.99 2
 6 -12 3 3.69 0.97 1
 -7 -12 -3 7.79 1.09 2
 -7 12 -3 7.03 1.12 2
 7 12 3 8.25 1.13 3
 7 -12 3 6.93 1.2 1
 -8 12 -3 42.81 2.17 2
 8 -12 3 35.11 2.13 1
 8 12 3 40 2.04 3
 -8 -12 -3 37.7 2.04 2
 9 12 3 77.66 2.9 3
 9 -12 3 71.14 3.01 1
 -9 -12 -3 78.91 3.11 2
 -9 12 -3 73.42 3 2
 10 -12 3 2.55 1.16 1
 -10 -12 -3 2.85 1.05 2
 -10 12 -3 3.13 1.08 2
 10 12 3 2.58 0.99 3
 11 -12 3 -0.35 1.02 1
 -11 -12 -3 0.12 0.9 2
 -11 12 -3 0.53 0.97 2
 11 12 3 1.37 0.99 3
 12 -12 3 9.65 1.51 1
 12 12 3 9.73 1.43 3
 -12 -12 -3 11.19 1.63 2
 -12 12 -3 8.25 1.52 2
 13 13 -3 8.71 1.58 3
 13 -13 -3 5.79 1.33 1
 -13 -13 3 6.32 1.53 2
 -12 -13 3 7.35 1.49 2
 12 -13 -3 6.27 1.27 1
 12 13 -3 6.1 1.35 3
 11 13 -3 25.89 2.05 3
 -11 -13 3 21.6 1.92 2
 11 -13 -3 28.1 2.1 1
 10 13 -3 2.46 0.91 3
 -10 13 3 2.89 0.92 2
 -10 -13 3 0.87 0.85 2
 10 -13 -3 2.63 1.02 1
 9 -13 -3 58.6 2.62 1
 -9 -13 3 54.28 2.54 2
 -9 13 3 55.91 2.37 2
 9 13 -3 57.61 2.53 3
 -8 -13 3 5.48 1.03 2
 8 -13 -3 5.9 1.09 1
 8 13 -3 5.69 1.1 3
 -8 13 3 6.45 0.99 2
 7 13 -3 60.1 2.39 3
 -7 13 3 64.98 2.29 2
 7 -13 -3 62.32 2.59 1
 -7 -13 3 61.57 2.5 2
 -7 13 3 63.13 2.11 3
 6 13 -3 17.55 1.4 3
 6 -13 -3 15.4 1.35 1
 -6 13 3 15.64 1.16 2
 -6 -13 3 15.45 1.29 2
 -6 13 3 17.85 1.22 3
 -5 13 3 42.69 1.66 2
 5 13 -3 37.95 1.73 3
 5 -13 -3 37.16 1.86 1
 -5 -13 3 40.96 1.88 2
 -5 13 3 40.92 1.64 3
 -4 -13 3 2.92 0.72 2
 -4 13 3 2.85 0.65 3
 -4 13 3 4.05 0.64 2
 4 -13 -3 2.5 0.73 1
 4 13 -3 3.07 0.71 3
 3 -13 -3 335.24 6.45 1
 -3 13 3 332.98 5.98 3
 3 13 -3 342.99 6.14 3
 -3 -13 3 331.9 6.42 2
 -3 13 3 333.16 5.93 2
 -3 -13 3 338.69 5.56 1
 -2 13 3 0.75 0.42 2
 -2 13 3 0.4 0.46 3
 2 -13 -3 0.79 0.56 1
 2 13 -3 0.34 0.44 3
 -2 -13 3 0.09 0.49 1
 2 13 -3 -0.07 0.46 2
 1 -13 -3 77.55 2.25 1
 -1 13 3 78.26 2.05 2
 1 13 -3 80.74 2.42 2
 1 13 -3 77.35 2.05 3
 -1 -13 3 79.09 2.16 1
 -1 13 3 79.18 2.22 3
 0 13 3 50.49 1.78 3
 0 13 3 52.91 1.63 2
 0 -13 -3 51.32 1.73 1
 0 -13 3 49.74 1.8 1
 0 13 -3 50.29 1.86 2
 0 13 -3 51.69 1.56 3
 -1 -13 -3 1.69 0.51 2
 -1 13 -3 1.8 0.46 3
 1 13 3 1.61 0.6 3
 -1 -13 -3 0.25 0.42 1
 1 -13 3 1.79 0.67 1
 -1 13 -3 0.81 0.53 2
 -2 -13 -3 5.11 0.6 1
 -2 -13 -3 3.14 0.64 2
 -2 13 -3 2.73 0.67 2
 2 -13 3 5.25 0.92 1
 -2 13 -3 4.15 0.5 3
 2 13 3 3.97 0.72 3
 -3 -13 -3 8.68 0.7 1
 3 13 3 8.71 0.94 3
 -3 -13 -3 8.55 0.87 2
 -3 13 -3 8.47 0.65 3
 -3 13 -3 10.68 1.03 2
 3 -13 3 9.12 1.06 1
 -4 -13 -3 73.99 1.88 1
 4 -13 3 72.81 2.59 1
 -4 13 -3 72.04 2.5 2
 4 13 3 68.42 2.34 3
 -4 -13 -3 71.46 2.29 2
 5 13 3 10.17 1.08 3
 -5 -13 -3 7.98 0.96 2
 5 -13 3 7.59 1.13 1
 -5 13 -3 8.78 1.05 2
 6 13 3 9.66 1.11 3
 -6 13 -3 12.59 1.25 2
 -6 -13 -3 11.21 1.15 2
 6 -13 3 11.33 1.3 1
 7 -13 3 -0.14 0.81 1
 -7 -13 -3 0 0.68 2
 -7 13 -3 -0.01 0.64 2
 7 13 3 -0.41 0.72 3
 8 -13 3 18.28 1.65 1
 8 13 3 18.13 1.49 3
 -8 13 -3 18.6 1.57 2
 -8 -13 -3 19.57 1.59 2
 -9 -13 -3 0.74 0.89 2
 -9 13 -3 1.35 0.97 2
 9 13 3 -1.13 0.78 3
 9 -13 3 0.62 0.87 1
 -10 13 -3 1.24 0.88 2
 10 -13 3 0.85 1.01 1
 -10 -13 -3 0.42 0.93 2
 10 13 3 0.54 0.96 3
 -11 -13 -3 2.17 1.04 2
 11 -13 3 1.03 1.16 1
 -11 13 -3 1.31 1.06 2
 11 13 3 0.63 1.02 3
 12 13 3 -0.41 0.94 3
 -12 -13 -3 1.62 1.09 2
 -12 13 -3 0.53 1.06 2
 12 -13 3 2.67 1.17 1
 -12 -14 3 8.34 1.57 2
 12 14 -3 11.86 1.6 3
 12 -14 -3 13.65 1.62 1
 11 -14 -3 36.59 2.42 1
 -11 -14 3 38.19 2.43 2
 11 14 -3 38.26 2.43 3
 10 14 -3 1.86 0.9 3
 10 -14 -3 2.13 0.96 1
 -10 -14 3 0.88 0.9 2
 9 14 -3 12.84 1.37 3
 -9 14 3 11.76 1.29 2
 -9 -14 3 11.63 1.38 2
 9 -14 -3 13.4 1.51 1
 -8 -14 3 41.58 2.24 2
 -8 14 3 45.53 2.05 2
 8 14 -3 44.12 2.23 3
 8 -14 -3 43.94 2.29 1
 7 -14 -3 24.99 1.79 1
 -7 14 3 25.04 1.5 2
 7 14 -3 21.26 1.56 3
 -7 -14 3 25.45 1.77 2
 -6 14 3 41.17 1.78 2
 6 -14 -3 44.15 2.17 1
 -6 -14 3 42.18 2.04 2
 -6 14 3 48.08 1.83 3
 6 14 -3 41.69 1.94 3
 5 14 -3 45.43 1.99 3
 -5 14 3 51.94 1.86 3
 -5 14 3 47.89 1.82 2
 5 -14 -3 48.76 2.16 1
 -5 -14 3 46.98 2.08 2
 -4 14 3 3.62 0.67 2
 -4 -14 3 4.31 0.87 2
 -4 14 3 4.22 0.71 3
 4 14 -3 3.6 0.73 3
 4 -14 -3 3.42 0.84 1
 -3 -14 3 45.62 1.41 1
 3 -14 -3 44.08 1.9 1
 -3 -14 3 47.18 1.93 2
 -3 14 3 44.95 1.65 2
 3 14 -3 46.14 1.74 3
 -3 14 3 45.25 1.7 3
 -2 14 3 39.01 1.58 3
 2 14 -3 39.14 1.73 2
 -2 -14 3 43.1 1.49 1
 2 14 -3 40.8 1.59 3
 -2 14 3 42.38 1.51 2
 2 -14 -3 41.24 1.73 1
 -1 14 3 -0.15 0.51 3
 1 14 -3 0.44 0.47 3
 -1 -14 3 0.55 0.58 1
 1 -14 -3 0.58 0.52 1
 -1 14 3 0.14 0.39 2
 1 14 -3 0.53 0.51 2
 0 -14 3 2.01 0.71 1
 0 14 -3 2.95 0.68 2
 0 14 -3 2.53 0.53 3
 0 14 3 2.9 0.65 3
 0 14 3 2.25 0.53 2
 0 -14 -3 2.38 0.56 1
 1 -14 3 1.03 0.72 1
 -1 14 -3 1.68 0.63 2
 -1 -14 -3 2.36 0.52 1
 -1 -14 -3 2.45 0.54 2
 -1 14 -3 1.7 0.48 3
 1 14 3 1.52 0.61 3
 -2 14 -3 6.62 0.62 3
 -2 -14 -3 6.19 0.68 1
 2 -14 3 6.83 0.97 1
 2 14 3 6.57 0.91 3
 -2 14 -3 5.19 0.85 2
 -2 -14 -3 5.88 0.76 2
 -3 -14 -3 19.73 1.24 2
 3 14 3 18.61 1.28 3
 -3 -14 -3 19.88 1.02 1
 3 -14 3 18.98 1.46 1
 -3 14 -3 21.44 1.36 2
 -4 -14 -3 17.95 1.28 2
 -4 14 -3 20.02 1.44 2
 4 -14 3 15.6 1.39 1
 4 14 3 20.71 1.39 3
 5 14 3 3.85 0.93 3
 -5 -14 -3 2.52 0.78 2
 5 -14 3 3.2 0.93 1
 -5 14 -3 4.27 0.89 2
 6 14 3 183.94 4.52 3
 -6 -14 -3 189.95 4.58 2
 -6 14 -3 189.36 4.75 2
 6 -14 3 189.37 4.94 1
 7 -14 3 2.8 1.04 1
 -7 14 -3 3.2 0.92 2
 -7 -14 -3 3.96 0.94 2
 7 14 3 1.98 0.93 3
 -8 14 -3 13.01 1.38 2
 8 -14 3 14.86 1.62 1
 8 14 3 10.7 1.28 3
 -8 -14 -3 12.86 1.43 2
 -9 14 -3 43.27 2.43 2
 9 -14 3 46.06 2.61 1
 -9 -14 -3 40.73 2.3 2
 9 14 3 42.5 2.25 3
 10 14 3 7.57 1.26 3
 -10 -14 -3 8.5 1.37 2
 10 -14 3 8.55 1.48 1
 -10 14 -3 10 1.45 2
 11 14 3 25.01 2.01 3
 -11 14 -3 23.17 2.08 2
 11 -14 3 24.68 2.18 1
 -11 -14 -3 25.08 2.19 2
 -12 14 -3 9.74 1.64 2
 -12 -14 -3 13.49 1.85 2
 12 -14 3 13.29 1.84 1
 12 14 3 9.56 1.58 3
 12 15 -3 47.45 2.77 3
 -12 -15 3 46.43 2.81 2
 12 -15 -3 50.4 2.85 1
 11 15 -3 0.41 1.01 3
 -11 -15 3 1.9 1.15 2
 11 -15 -3 2.76 1.08 1
 10 15 -3 45.48 2.51 3
 10 -15 -3 49.44 2.61 1
 -10 -15 3 52.11 2.73 2
 -9 -15 3 1.23 0.86 2
 9 -15 -3 2.27 0.99 1
 9 15 -3 0.55 0.78 3
 -8 -15 3 30.32 1.95 2
 8 15 -3 26.42 1.77 3
 -8 15 3 32.04 1.83 2
 8 -15 -3 26.88 1.9 1
 -7 -15 3 75.22 2.9 2
 7 -15 -3 72.88 2.88 1
 -7 15 3 76.54 2.63 2
 7 15 -3 69.29 2.67 3
 -6 15 3 50.65 2.04 2
 6 15 -3 52.25 2.24 3
 -6 -15 3 54.18 2.35 2
 -6 15 3 54.69 2 3
 6 -15 -3 50.5 2.33 1
 -5 15 3 206.8 4.31 3
 5 15 -3 205.84 4.68 3
 5 -15 -3 204.14 4.93 1
 -5 15 3 208.08 4.47 2
 -5 -15 3 199.19 4.85 2
 4 -15 -3 42.51 2.03 1
 -4 -15 3 45.37 2.02 2
 -4 15 3 48.99 1.81 3
 -4 15 3 49.07 1.81 2
 4 15 -3 46 1.88 3
 -3 15 3 258.32 5 3
 3 -15 -3 259.72 5.47 1
 3 15 -3 258.78 5.14 3
 -3 -15 3 255.18 4.55 1
 -3 15 3 247.13 4.92 2
 -3 -15 3 247.12 5.39 2
 2 15 -3 44.96 1.73 3
 -2 -15 3 47.63 1.64 1
 -2 15 3 50.77 1.73 2
 2 -15 -3 47.73 1.92 1
 -2 15 3 49.13 1.78 3
 2 15 -3 51.03 2.03 2
 -1 15 3 0.13 0.53 3
 -1 15 3 0.21 0.4 2
 1 15 -3 -0.1 0.48 3
 -1 -15 3 -0.41 0.53 1
 1 -15 -3 -0.6 0.46 1
 1 15 -3 -0.94 0.41 2
 0 -15 3 168.08 3.81 1
 0 15 3 166.49 3.76 3
 0 15 -3 172.27 4.05 2
 0 -15 -3 164.4 3.69 1
 0 15 3 168.38 3.62 2
 0 15 -3 168.05 3.45 3
 1 15 3 120.79 3.11 3
 -1 -15 -3 125.29 3 2
 -1 15 -3 122.83 3.31 2
 1 -15 3 121.03 3.22 1
 -1 15 -3 123.77 2.69 3
 -1 -15 -3 122.97 2.94 1
 2 15 3 109.82 2.99 3
 -2 15 -3 106.22 3.09 2
 2 -15 3 108.48 3.14 1
 -2 -15 -3 107.62 2.64 1
 -2 -15 -3 108.62 2.82 2
 -2 15 -3 109.7 2.38 3
 -3 15 -3 17.89 1.37 2
 3 15 3 15.36 1.25 3
 -3 -15 -3 18.77 1.26 2
 3 -15 3 19.49 1.57 1
 -3 -15 -3 17.47 1.01 1
 -4 15 -3 52.46 2.2 2
 4 15 3 54.1 2.16 3
 -4 -15 -3 53.96 2.07 2
 4 -15 3 53.45 2.35 1
 -5 -15 -3 0.78 0.72 2
 5 15 3 2.73 0.84 3
 5 -15 3 2.06 1.02 1
 -5 15 -3 2.59 0.82 2
 -6 -15 -3 1.6 0.77 2
 6 -15 3 0.99 0.89 1
 -6 15 -3 2.25 0.91 2
 6 15 3 -0.62 0.66 3
 7 15 3 14.22 1.41 3
 -7 15 -3 12.61 1.35 2
 -7 -15 -3 11.1 1.26 2
 7 -15 3 11.12 1.41 1
 8 -15 3 5.16 1.2 1
 -8 15 -3 5.02 1.13 2
 -8 -15 -3 6.79 1.22 2
 8 15 3 5.23 1.09 3
 -9 -15 -3 0.08 0.84 2
 9 -15 3 1.78 1.11 1
 9 15 3 0.56 0.93 3
 -9 15 -3 -0.18 0.75 2
 -10 15 -3 10.53 1.55 2
 -10 -15 -3 11.13 1.51 2
 10 -15 3 12.47 1.65 1
 10 15 3 11.71 1.45 3
 -11 15 -3 -0.2 0.98 2
 11 -15 3 0.75 1.08 1
 -11 -15 -3 -0.89 0.93 2
 11 15 3 -0.9 0.97 3
 12 16 -3 7.7 1.53 3
 -12 -16 3 6.19 1.45 2
 12 -16 -3 7.16 1.37 1
 -11 -16 3 10.67 1.59 2
 11 16 -3 12.59 1.59 3
 11 -16 -3 13.26 1.65 1
 10 -16 -3 13.84 1.58 1
 10 16 -3 13.67 1.53 3
 -10 -16 3 10.92 1.51 2
 9 -16 -3 7.32 1.31 1
 9 16 -3 6.39 1.18 3
 -9 -16 3 5.79 1.19 2
 8 16 -3 16.88 1.5 3
 8 -16 -3 17.23 1.66 1
 -8 -16 3 17.91 1.64 2
 -7 -16 3 -0.69 0.65 2
 7 -16 -3 0.57 0.77 1
 -7 16 3 -0.8 0.63 2
 7 16 -3 0.01 0.73 3
 6 16 -3 128.1 3.64 3
 6 -16 -3 117.82 3.76 1
 -6 16 3 133.68 3.48 2
 -6 -16 3 124.76 3.8 2
 5 -16 -3 117.25 3.58 1
 -5 16 3 121.09 3.19 2
 -5 -16 3 120.55 3.57 2
 -5 16 3 114.6 3.01 3
 5 16 -3 111.58 3.3 3
 -4 16 3 6.88 0.9 3
 -4 16 3 8.51 0.93 2
 -4 -16 3 6.18 1.02 2
 4 16 -3 7.73 1 3
 4 -16 -3 8.98 1.13 1
 3 -16 -3 198.03 4.69 1
 3 16 -3 206.9 4.47 3
 -3 -16 3 206.12 4.79 2
 -3 16 3 205.88 4.32 2
 -3 16 3 202.11 4.3 3
 -2 16 3 183.92 4.01 2
 2 16 -3 197.48 4.57 2
 2 16 -3 187.26 4.08 3
 -2 16 3 188.44 4.13 3
 2 -16 -3 196.56 4.44 1
 -2 -16 3 191.89 3.91 1
 -1 16 3 7.52 0.83 2
 1 16 -3 7.37 0.98 2
 1 16 -3 5.42 0.78 3
 -1 16 3 4.92 0.86 3
 -1 -16 3 5.37 0.82 1
 0 16 3 216.26 4.39 2
 0 16 -3 222.2 4.86 2
 0 16 -3 206.79 4.15 3
 0 16 3 207.33 4.48 3
 0 -16 3 212.9 4.57 1
 0 -16 -3 210.81 4.47 1
 -1 -16 -3 39.63 1.61 1
 1 16 3 43.57 1.88 3
 -1 -16 -3 41.85 1.69 2
 -1 16 -3 43.57 1.51 3
 1 -16 3 41.43 1.91 1
 -1 16 -3 44.62 1.94 2
 -2 -16 -3 25.05 1.4 2
 2 16 3 26.76 1.52 3
 -2 -16 -3 27.69 1.28 1
 -2 16 -3 24.75 1.53 2
 2 -16 3 24.99 1.68 1
 3 -16 3 44.6 2.12 1
 -3 16 -3 46.27 2.07 2
 -3 -16 -3 45.34 1.61 1
 -3 -16 -3 46.1 1.87 2
 3 16 3 45.37 1.98 3
 4 -16 3 79.67 2.94 1
 4 16 3 77.17 2.67 3
 -4 16 -3 76.4 2.76 2
 -4 -16 -3 75.01 2.54 2
 -5 16 -3 2.08 0.84 2
 5 -16 3 1.51 0.91 1
 -5 -16 -3 0.47 0.71 2
 5 16 3 1.25 0.8 3
 6 -16 3 10.94 1.38 1
 6 16 3 12.19 1.34 3
 -6 -16 -3 11.43 1.3 2
 -6 16 -3 12.25 1.34 2
 -7 16 -3 0.15 0.74 2
 7 16 3 1.12 0.8 3
 7 -16 3 1.53 0.97 1
 -7 -16 -3 0.86 0.76 2
 8 16 3 4.96 1.13 3
 -8 16 -3 7.97 1.32 2
 8 -16 3 7.95 1.34 1
 -8 -16 -3 5.76 1.2 2
 9 16 3 33.15 2.11 3
 -9 -16 -3 34.61 2.24 2
 -9 16 -3 35.26 2.22 2
 9 -16 3 39.39 2.51 1
 10 16 3 0.54 1.02 3
 -10 16 -3 0.5 0.99 2
 -10 -16 -3 -0.25 0.97 2
 10 -16 3 0.48 1.16 1
 -11 16 -3 17.65 1.94 2
 -11 -16 -3 16.43 1.86 2
 11 -16 3 14.87 1.83 1
 11 16 3 19.49 1.92 3
 11 17 -3 4.32 1.26 3
 -11 -17 3 5.75 1.46 2
 11 -17 -3 7.25 1.41 1
 -10 -17 3 2.74 1.15 2
 10 -17 -3 0.94 0.97 1
 10 17 -3 1.05 0.95 3
 -9 -17 3 6.86 1.27 2
 9 -17 -3 6.46 1.24 1
 9 17 -3 3.75 1.06 3
 8 -17 -3 2.55 0.97 1
 8 17 -3 1.56 0.9 3
 -8 -17 3 0.25 0.8 2
 7 17 -3 31.04 1.89 3
 -7 -17 3 32.32 2.02 2
 7 -17 -3 34.6 2.1 1
 -6 -17 3 3.58 0.98 2
 6 -17 -3 3.59 0.97 1
 -6 17 3 3.13 0.88 2
 6 17 -3 5 1 3
 5 -17 -3 24.88 1.71 1
 -5 17 3 25.72 1.51 2
 -5 17 3 25.05 1.43 3
 -5 -17 3 24.08 1.67 2
 5 17 -3 26.89 1.72 3
 -4 -17 3 52.9 2.31 2
 -4 17 3 57.65 2.05 3
 4 17 -3 54.08 2.19 3
 -4 17 3 57.71 2.11 2
 4 -17 -3 55.64 2.36 1
 -3 -17 3 0.08 0.64 2
 -3 17 3 -0.37 0.54 2
 3 17 -3 -0.33 0.57 3
 -3 17 3 -0.02 0.67 3
 3 -17 -3 0.7 0.68 1
 2 17 -3 151.34 4 2
 -2 17 3 149.15 3.51 2
 -2 -17 3 151.55 3.38 1
 -2 17 3 149.03 3.62 3
 2 17 -3 150.03 3.57 3
 2 -17 -3 151.44 3.84 1
 -1 -17 3 226.23 4.63 1
 -1 17 3 225.01 4.63 2
 1 17 -3 226.44 4.56 3
 1 -17 -3 219.63 4.8 1
 1 17 -3 220.26 5.05 2
 -1 17 3 218.18 4.69 3
 0 17 -3 42.07 1.94 2
 0 -17 -3 42.04 1.7 2
 0 17 -3 38.55 1.54 3
 0 17 3 39.5 1.78 3
 0 -17 3 40.47 1.82 1
 0 -17 -3 35.15 1.63 1
 0 17 3 40.13 1.68 2
 1 -17 3 220.59 4.85 1
 -1 17 -3 219.28 5 2
 -1 -17 -3 208.27 4.5 2
 1 17 3 213.98 4.7 3
 -1 17 -3 210.27 4.15 3
 -1 -17 -3 211.12 4.46 1
 -2 -17 -3 208.75 4.3 1
 -2 -17 -3 205.34 4.53 2
 2 17 3 204.28 4.65 3
 2 -17 3 207.33 4.85 1
 -2 17 -3 210.35 4.92 2
 -3 17 -3 15.6 1.37 2
 3 -17 3 12.84 1.38 1
 -3 -17 -3 12.59 1.2 2
 -4 17 -3 460.37 8.82 2
 -4 -17 -3 460.32 8.5 2
 4 -17 3 456.44 8.89 1
 4 17 3 449.17 8.52 3
 -5 -17 -3 4.55 0.94 2
 -5 17 -3 3.16 0.98 2
 5 -17 3 5.72 1.12 1
 5 17 3 3.35 0.93 3
 6 17 3 142.61 4.05 3
 6 -17 3 142.71 4.35 1
 -6 -17 -3 146.52 4.09 2
 -6 17 -3 144.45 4.24 2
 -7 17 -3 17.48 1.59 2
 -7 -17 -3 15.39 1.47 2
 7 -17 3 13.78 1.64 1
 7 17 3 13.99 1.47 3
 -8 17 -3 3.08 1.05 2
 8 -17 3 1.67 1.04 1
 8 17 3 3.56 1.04 3
 -8 -17 -3 3.85 1.11 2
 9 -17 3 9.97 1.52 1
 -9 17 -3 9.65 1.47 2
 -9 -17 -3 9.61 1.41 2
 9 17 3 7.38 1.27 3
 -10 -17 -3 5.08 1.31 2
 10 -17 3 4.24 1.37 1
 10 17 3 3.94 1.24 3
 -10 17 -3 1.88 1.12 2
 -11 -17 -3 24.81 2.2 2
 11 -17 3 25.46 2.31 1
 11 17 3 22.12 2.06 3
 -11 17 -3 25.08 2.17 2
 11 -18 -3 0.56 0.94 1
 11 18 -3 -1.32 0.96 3
 -11 -18 3 0.26 1.02 2
 -10 -18 3 0.4 0.94 2
 10 18 -3 -1.14 0.9 3
 10 -18 -3 0.11 0.92 1
 9 18 -3 1.68 1 3
 9 -18 -3 1.61 1.02 1
 -9 -18 3 0.1 0.82 2
 -8 -18 3 26.38 1.96 2
 8 -18 -3 30.24 2.16 1
 8 18 -3 31.82 2.09 3
 7 -18 -3 10.53 1.35 1
 -7 -18 3 12.86 1.47 2
 7 18 -3 13.8 1.4 3
 -6 -18 3 0.57 0.85 2
 6 18 -3 0.22 0.74 3
 6 -18 -3 0.43 0.78 1
 5 18 -3 20.26 1.58 3
 5 -18 -3 21.12 1.64 1
 -5 18 3 21.45 1.43 2
 -5 -18 3 21.65 1.63 2
 4 18 -3 4.97 0.93 3
 -4 18 3 6.51 0.96 3
 -4 -18 3 5.38 1.02 2
 4 -18 -3 5.56 1.03 1
 -4 18 3 6.73 0.92 2
 -3 18 3 113.31 3.09 3
 -3 -18 3 109.47 3.39 2
 -3 18 3 113.05 3.05 2
 3 -18 -3 108.98 3.32 1
 3 18 -3 106.42 3.07 3
 2 -18 -3 106.34 3.14 1
 -2 18 3 102.89 2.89 2
 2 18 -3 106.71 3.28 2
 -2 18 3 99.79 2.9 3
 2 18 -3 104.04 2.9 3
 -2 -18 3 102.88 2.7 1
 1 18 -3 13.28 1.05 3
 -1 18 3 12.07 1.19 3
 -1 -18 3 11.73 1.07 1
 -1 18 3 13.75 1.12 2
 1 -18 -3 15.39 1.18 1
 1 18 -3 13.54 1.3 2
 0 18 -3 130.23 3.1 3
 0 -18 -3 129.06 3.33 1
 0 -18 3 130.33 3.44 1
 0 18 3 127.97 3.38 3
 0 -18 -3 126.84 3.26 2
 0 18 -3 129.72 3.64 2
 -1 -18 -3 33.7 1.55 1
 -1 -18 -3 30.17 1.56 2
 1 18 3 33.5 1.78 3
 1 -18 3 32.84 1.74 1
 -1 18 -3 30.04 1.82 2
 -2 -18 -3 187.6 4.32 2
 2 18 3 188.47 4.49 3
 -2 18 -3 190.9 4.73 2
 -2 -18 -3 195.13 4.14 1
 2 -18 3 184.57 4.62 1
 -3 18 -3 338.24 7.03 2
 3 -18 3 336.49 7.03 1
 3 18 3 322.01 6.66 3
 -3 -18 -3 330.5 6.59 2
 -4 18 -3 1.15 0.81 2
 4 18 3 0.87 0.8 3
 -4 -18 -3 0.8 0.81 2
 4 -18 3 -0.03 0.88 1
 -5 -18 -3 50.77 2.25 2
 5 18 3 50.06 2.29 3
 -5 18 -3 54.75 2.5 2
 5 -18 3 55.23 2.61 1
 6 18 3 4.78 1.06 3
 -6 -18 -3 3.21 0.95 2
 -6 18 -3 5.18 1.15 2
 6 -18 3 3.75 1.1 1
 -7 18 -3 35.32 2.22 2
 -7 -18 -3 38.01 2.13 2
 7 18 3 30.99 2.07 3
 7 -18 3 34.55 2.24 1
 -8 -18 -3 3.42 1.08 2
 8 -18 3 3.39 1.18 1
 8 18 3 4.07 1.12 3
 -8 18 -3 3.75 1.12 2
 9 18 3 14.18 1.65 3
 -9 18 -3 10.27 1.53 2
 -9 -18 -3 12.36 1.56 2
 9 -18 3 10.17 1.57 1
 10 -18 3 25.65 2.24 1
 -10 -18 -3 30.94 2.35 2
 -10 18 -3 32.95 2.42 2
 10 18 3 28.49 2.25 3
 10 19 -3 -0.39 0.88 3
 -10 -19 3 0.1 0.91 2
 10 -19 -3 0.37 0.93 1
 9 19 -3 6.28 1.24 3
 -9 -19 3 4.26 1.19 2
 9 -19 -3 6 1.29 1
 8 19 -3 2.89 1.07 3
 8 -19 -3 1.87 0.98 1
 -8 -19 3 1.9 0.99 2
 -7 -19 3 -0.36 0.74 2
 7 -19 -3 0.97 0.92 1
 7 19 -3 -0.5 0.72 3
 6 -19 -3 9.09 1.31 1
 6 19 -3 7.19 1.18 3
 -6 -19 3 10.09 1.38 2
 5 19 -3 -0.39 0.78 3
 -5 -19 3 1.91 0.88 2
 5 -19 -3 2.17 0.9 1
 4 19 -3 3.67 0.9 3
 -4 19 3 3.89 0.88 3
 4 -19 -3 4.12 0.95 1
 -4 -19 3 2.13 0.84 2
 3 19 -3 1.91 0.77 3
 3 -19 -3 0.27 0.67 1
 -3 19 3 0.07 0.68 3
 -3 -19 3 0.11 0.68 2
 -3 19 3 0.11 0.64 2
 2 19 -3 49.79 2 3
 -2 19 3 50.75 2.02 2
 2 19 -3 49.23 2.25 2
 -2 19 3 49.19 2.03 3
 2 -19 -3 46.39 2.08 1
 -1 -19 3 43.59 1.88 1
 1 -19 -3 43.32 1.96 1
 1 19 -3 44.67 2.18 2
 -1 19 3 45.07 1.87 2
 -1 19 3 42.78 1.97 3
 1 19 -3 46.53 1.89 3
 0 19 -3 10.4 1.25 2
 0 19 3 11.43 1.16 3
 0 -19 3 9.87 1.13 1
 0 -19 -3 13.18 1.1 2
 0 -19 -3 11.58 1.03 1
 0 19 -3 10.47 1 3
 -1 -19 -3 28.93 1.48 1
 -1 -19 -3 31.31 1.6 2
 1 -19 3 25.65 1.65 1
 -1 19 -3 29.6 1.79 2
 1 19 3 30.87 1.79 3
 2 -19 3 14.18 1.42 1
 -2 -19 -3 12.42 1.15 2
 -2 19 -3 15.36 1.46 2
 2 19 3 15.12 1.31 3
 -3 -19 -3 83.89 2.8 2
 3 -19 3 90.2 3.15 1
 -3 19 -3 87.85 3.11 2
 3 19 3 89.36 3.03 3
 4 -19 3 21.02 1.73 1
 -4 19 -3 21.28 1.69 2
 4 19 3 20.78 1.61 3
 -4 -19 -3 18.36 1.44 2
 5 19 3 9.1 1.22 3
 5 -19 3 11.24 1.41 1
 -5 -19 -3 10.66 1.24 2
 -5 19 -3 10.19 1.32 2
 6 -19 3 19.84 1.85 1
 6 19 3 19.2 1.6 3
 -6 -19 -3 20.37 1.61 2
 -6 19 -3 20.05 1.75 2
 7 -19 3 14.45 1.67 1
 -7 -19 -3 14.23 1.51 2
 -7 19 -3 16.93 1.7 2
 7 19 3 16.88 1.58 3
 -8 19 -3 8.05 1.37 2
 8 -19 3 7.56 1.37 1
 8 19 3 9.36 1.44 3
 -8 -19 -3 8.13 1.34 2
 -9 19 -3 20.33 1.98 2
 9 -19 3 17.53 1.9 1
 9 19 3 17.84 1.77 3
 -9 -19 -3 20.18 1.87 2
 -10 19 -3 7.38 1.52 2
 -10 -19 -3 5.24 1.35 2
 10 19 3 6.71 1.42 3
 10 -19 3 6.4 1.48 1
 10 -20 -3 7.84 1.49 1
 -10 -20 3 6.17 1.43 2
 10 20 -3 8.59 1.47 3
 9 -20 -3 2.2 1.06 1
 -9 -20 3 1.49 1.03 2
 9 20 -3 2.76 1.1 3
 -8 -20 3 -0.55 0.86 2
 8 20 -3 1.2 0.9 3
 8 -20 -3 1.45 0.98 1
 7 20 -3 1.49 0.98 3
 -7 -20 3 2.63 1.04 2
 7 -20 -3 2.49 1.01 1
 6 20 -3 7.13 1.21 3
 -6 -20 3 4.12 1.12 2
 6 -20 -3 4.86 1.11 1
 5 20 -3 2.76 0.94 3
 -5 -20 3 4.39 1.06 2
 5 -20 -3 3.45 1 1
 -4 -20 3 7.01 1.15 2
 4 20 -3 5.75 1.05 3
 4 -20 -3 7.19 1.16 1
 -3 -20 3 5.77 1.11 2
 -3 20 3 6.43 0.97 3
 3 -20 -3 3.97 0.99 1
 3 20 -3 5.01 0.92 3
 -2 20 3 3.76 0.85 2
 2 20 -3 3.87 0.95 2
 2 -20 -3 4.01 0.92 1
 2 20 -3 4.32 0.88 3
 -2 20 3 3.73 0.91 3
 1 20 -3 130.5 3.86 2
 1 20 -3 124.68 3.3 3
 -1 20 3 130.26 3.44 2
 -1 20 3 127.7 3.5 3
 -1 -20 3 132.62 3.43 1
 1 -20 -3 125.05 3.54 1
 0 -20 3 9.74 1.17 1
 0 20 3 8.87 1.13 3
 0 20 -3 9.25 1.24 2
 0 -20 -3 8.09 1 2
 0 -20 -3 9.96 1.05 1
 1 -20 3 57.83 2.44 1
 -1 20 -3 58.24 2.48 2
 1 20 3 59.53 2.4 3
 -1 -20 -3 54.49 2.17 2
 -1 -20 -3 59.9 2.15 1
 2 20 3 4.42 0.96 3
 -2 -20 -3 6.24 0.98 2
 2 -20 3 6.55 1.08 1
 -2 20 -3 6.36 1.09 2
 3 -20 3 44.59 2.32 1
 -3 20 -3 51.81 2.46 2
 -3 -20 -3 45.8 2.12 2
 3 20 3 47.99 2.24 3
 4 -20 3 50.53 2.52 1
 -4 20 -3 50.99 2.45 2
 -4 -20 -3 49.57 2.24 2
 4 20 3 49.5 2.4 3
 -5 -20 -3 0.26 0.77 2
 5 -20 3 -0.29 0.89 1
 5 20 3 -0.28 0.85 3
 -5 20 -3 -0.35 0.72 2
 6 -20 3 2.27 1.06 1
 6 20 3 2.71 0.98 3
 -6 20 -3 1.99 0.96 2
 -6 -20 -3 3.25 0.98 2
 7 20 3 8.83 1.36 3
 -7 -20 -3 8.49 1.29 2
 7 -20 3 7.3 1.39 1
 -7 20 -3 7.2 1.3 2
 -8 -20 -3 -0.38 0.8 2
 8 -20 3 -0.18 1.02 1
 -8 20 -3 1.77 0.97 2
 8 20 3 -0.34 0.93 3
 9 -20 3 5.28 1.47 1
 9 20 3 7.19 1.38 3
 -9 20 -3 6.7 1.49 2
 -9 -20 -3 6.59 1.45 2
 9 21 -3 3.06 1.19 3
 -9 -21 3 0.57 0.96 2
 9 -21 -3 3.99 1.19 1
 -8 -21 3 -0.06 0.86 2
 8 -21 -3 -0.48 0.92 1
 8 21 -3 -0.24 0.92 3
 -7 -21 3 3.39 1.11 2
 7 -21 -3 2.51 1.07 1
 7 21 -3 1.11 0.97 3
 6 21 -3 0.58 0.86 3
 -6 -21 3 2.51 1 2
 6 -21 -3 1.82 0.99 1
 5 21 -3 3.45 1.05 3
 5 -21 -3 4.31 1.13 1
 -5 -21 3 4.1 1.13 2
 -4 -21 3 4.36 1.08 2
 4 21 -3 4.17 0.94 3
 4 -21 -3 5.64 1.07 1
 3 21 -3 15.88 1.36 3
 3 -21 -3 13.78 1.35 1
 -3 -21 3 13.82 1.44 2
 2 21 -3 -0.35 0.72 2
 -2 -21 3 1.21 0.8 2
 -2 21 3 -0.16 0.73 3
 2 -21 -3 0.87 0.73 1
 2 21 -3 0.28 0.67 3
 1 -21 -3 3.42 0.81 1
 1 21 -3 1.68 0.87 2
 1 21 -3 0.73 0.65 3
 -1 21 3 0.47 0.64 2
 -1 21 3 -0.18 0.75 3
 0 21 -3 1.97 0.87 2
 0 -21 -3 4.42 0.85 2
 0 -21 3 3.77 0.94 1
 0 21 3 2.06 0.92 3
 1 21 3 0.25 0.82 3
 -1 -21 -3 2.1 0.71 1
 -1 -21 -3 -0.24 0.63 2
 -1 21 -3 1.64 0.87 2
 1 -21 3 0.63 0.83 1
 2 21 3 0.83 0.86 3
 2 -21 3 0.52 0.85 1
 -2 21 -3 -1.18 0.69 2
 -2 -21 -3 1.16 0.75 2
 3 21 3 4.13 1.06 3
 3 -21 3 3.75 1.14 1
 -3 -21 -3 4.03 0.96 2
 -3 21 -3 2.75 1.01 2
 4 21 3 4.16 1.09 3
 -4 21 -3 4.08 1.07 2
 -4 -21 -3 4.61 1.07 2
 4 -21 3 4.63 1.12 1
 5 -21 3 18.65 1.77 1
 -5 -21 -3 23.03 1.77 2
 -5 21 -3 20.3 1.83 2
 5 21 3 20.84 1.71 3
 6 21 3 4.4 1.13 3
 6 -21 3 3.94 1.23 1
 -6 21 -3 2.79 1.13 2
 -6 -21 -3 2.02 1.01 2
 -7 21 -3 -0.84 0.88 2
 7 21 3 0.7 0.93 3
 7 -21 3 -0.06 0.98 1
 -7 -21 -3 -0.11 0.88 2
 -8 -21 -3 -0.76 0.83 2
 8 -21 3 -0.09 0.98 1
 -8 21 -3 0.98 1.09 2
 8 21 3 0.78 0.98 3
 9 -21 3 4.62 1.37 1
 -9 -21 -3 1.14 1.03 2
 9 21 3 3.25 1.22 3
 -9 21 -3 2.85 1.17 2
 9 22 -3 0.33 1.06 3
 -9 -22 3 1.79 1.08 2
 9 -22 -3 -1.15 0.82 1
 8 -22 -3 3.59 1.26 1
 -8 -22 3 3.35 1.23 2
 8 22 -3 3.36 1.23 3
 7 22 -3 1.36 1.04 3
 7 -22 -3 0.55 0.88 1
 -7 -22 3 -0.7 0.91 2
 -6 -22 3 -0.04 0.87 2
 6 22 -3 0.08 0.81 3
 6 -22 -3 0.15 0.88 1
 -5 -22 3 1.25 1.04 2
 5 -22 -3 0.52 0.86 1
 5 22 -3 1.22 0.84 3
 -4 -22 3 1.87 1.04 2
 4 -22 -3 1.81 0.93 1
 4 22 -3 3.39 0.97 3
 3 -22 -3 5.13 1.08 1
 -3 -22 3 4.53 1.14 2
 3 22 -3 4.67 0.94 3
 -2 -22 3 15.27 1.5 2
 -2 22 3 13.71 1.34 3
 2 -22 -3 12.65 1.32 1
 2 22 -3 13.07 1.27 3
 1 22 -3 6.06 1.18 2
 1 -22 -3 7 1.05 1
 -1 22 3 5.55 1.04 3
 0 22 3 20.06 1.52 3
 0 -22 -3 20.66 1.47 1
 0 -22 3 19.41 1.55 1
 0 22 -3 22.57 1.71 2
 -1 -22 -3 0.38 0.67 2
 -1 22 -3 -0.87 0.67 2
 1 22 3 0.72 0.85 3
 1 -22 3 -0.18 0.79 1
 2 22 3 21.14 1.67 3
 -2 22 -3 21.65 1.73 2
 -2 -22 -3 19.63 1.54 2
 2 -22 3 26.43 1.91 1
 3 -22 3 9.75 1.42 1
 -3 22 -3 10.03 1.38 2
 3 22 3 11.03 1.39 3
 -3 -22 -3 8.72 1.16 2
 4 22 3 43.31 2.28 3
 -4 -22 -3 39.85 2.21 2
 4 -22 3 45.27 2.56 1
 -4 22 -3 41.4 2.42 2
 -5 22 -3 101.89 3.8 2
 -5 -22 -3 99 3.45 2
 5 -22 3 101.58 3.87 1
 5 22 3 102.95 3.66 3
 6 -22 3 4.07 1.22 1
 -6 22 -3 3.32 1.17 2
 6 22 3 2.51 1.15 3
 -6 -22 -3 1.08 0.87 2
 7 22 3 19.97 1.81 3
 -7 -22 -3 20.69 1.83 2
 7 -22 3 19.11 1.97 1
 -7 22 -3 20.42 1.91 2
 -8 -22 -3 5.67 1.29 2
 -8 22 -3 5.86 1.43 2
 8 -22 3 5.18 1.43 1
 8 22 3 5.02 1.3 3
 8 -23 -3 3.58 1.21 1
 8 23 -3 3.99 1.27 3
 -8 -23 3 3.32 1.31 2
 7 -23 -3 -0.24 0.82 1
 7 23 -3 -0.35 0.92 3
 -7 -23 3 1.39 1.14 2
 6 -23 -3 6.43 1.35 1
 6 23 -3 4.55 1.1 3
 -6 -23 3 4.39 1.24 2
 5 23 -3 2.48 0.95 3
 5 -23 -3 1.84 1.04 1
 -5 -23 3 3.44 1.13 2
 4 -23 -3 -0.11 0.71 1
 -4 -23 3 0.4 0.85 2
 4 23 -3 0.65 0.78 3
 -3 -23 3 6.27 1.27 2
 3 23 -3 6.26 1.09 3
 3 -23 -3 4.65 1.09 1
 -2 -23 3 3.22 1.05 2
 2 -23 -3 2.32 0.82 1
 1 -23 -3 16.67 1.37 1
 1 23 -3 13.56 1.55 2
 -1 23 3 13.54 1.4 3
 0 -23 -3 1.57 0.75 1
 0 23 3 2.47 0.98 3
 0 23 -3 2.58 0.97 2
 1 -23 3 1.02 0.85 1
 1 23 3 0.59 0.88 3
 -1 23 -3 -0.54 0.7 2
 2 -23 3 11.91 1.39 1
 -2 23 -3 12.41 1.47 2
 2 23 3 10.4 1.4 3
 -2 -23 -3 9.67 1.26 2
 3 -23 3 0.64 0.98 1
 -3 23 -3 -2.54 0.79 2
 3 23 3 0.69 0.95 3
 -3 -23 -3 -1.07 0.71 2
 4 23 3 28.33 2.07 3
 4 -23 3 29.07 2.24 1
 -4 23 -3 28.65 2.15 2
 -4 -23 -3 27.22 1.94 2
 5 -23 3 16.08 1.74 1
 5 23 3 17.88 1.76 3
 -5 23 -3 14.38 1.64 2
 -5 -23 -3 15.19 1.62 2
 6 -23 3 12.97 1.75 1
 -6 23 -3 12.28 1.66 2
 6 23 3 12.39 1.56 3
 -6 -23 -3 13.4 1.57 2
 -7 -23 -3 -0.1 1 2
 -7 23 -3 -0.3 0.97 2
 7 23 3 0.29 0.93 3
 7 -23 3 -0.68 0.95 1
 7 -24 -3 0.21 0.94 1
 -7 -24 3 0.5 1.11 2
 7 24 -3 -0.76 0.95 3
 6 24 -3 0.09 0.85 3
 -6 -24 3 0.6 1.08 2
 6 -24 -3 1.55 1.03 1
 5 -24 -3 4.97 1.25 1
 5 24 -3 2.62 0.98 3
 -5 -24 3 2.18 1.1 2
 -4 -24 3 19.29 1.89 2
 4 -24 -3 18.62 1.7 1
 4 24 -3 17.83 1.63 3
 3 24 -3 1.76 0.92 3
 3 -24 -3 0.8 0.82 1
 -3 -24 3 1.64 0.99 2
 -2 -24 3 1.52 0.93 2
 2 -24 -3 0.69 0.76 1
 1 24 -3 2.11 0.95 2
 1 -24 -3 2.33 0.84 1
 -1 24 3 0.94 0.9 3
 0 24 -3 6.7 1.24 2
 0 24 3 2.67 1.03 3
 1 -24 3 9.14 1.3 1
 1 24 3 11.88 1.45 3
 -1 24 -3 7.99 1.36 2
 2 24 3 1.69 1 3
 2 -24 3 0.13 0.87 1
 -2 24 -3 1.12 0.97 2
 3 24 3 0.74 0.99 3
 3 -24 3 1.34 1.06 1
 -3 24 -3 0.82 0.96 2
 4 -24 3 9.31 1.48 1
 -4 24 -3 12.13 1.61 2
 -4 -24 -3 10.45 1.42 2
 4 24 3 12.15 1.49 3
 5 -24 3 0.14 1.04 1
 -5 24 -3 -0.32 0.98 2
 -5 -24 -3 -0.73 0.89 2
 5 24 3 0.98 1.04 3
 -6 -24 -3 1.57 1 2
 6 24 3 1.53 1.18 3
 6 -24 3 2.02 1.25 1
 -6 24 -3 2.99 1.21 2
 6 -25 -3 15.62 1.77 1
 6 25 -3 17.22 1.71 3
 -6 -25 3 17.71 1.95 2
 5 -25 -3 43.81 2.63 1
 -5 -25 3 38.51 2.51 2
 5 25 -3 39.28 2.36 3
 4 25 -3 8.63 1.3 3
 4 -25 -3 8.28 1.34 1
 -4 -25 3 3.8 1.25 2
 -3 -25 3 45.38 2.63 2
 3 -25 -3 39.81 2.31 1
 2 -25 -3 1.19 0.8 1
 -2 -25 3 0.14 0.8 2
 1 -25 -3 10.94 1.32 1
 -1 -25 3 15.93 1.7 2
 1 25 -3 12.92 1.56 2
 0 25 3 6.11 1.25 3
 0 25 -3 6.93 1.3 2
 -1 25 -3 16.9 1.73 2
 1 25 3 19.96 1.76 3
 -2 25 -3 31.46 2.23 2
 2 25 3 27.35 2.06 3
 2 -25 3 24.58 2.01 1
 3 25 3 3.66 1.18 3
 3 -25 3 3.18 1.21 1
 -3 25 -3 2.7 1.18 2
 4 -25 3 60.49 3 1
 4 25 3 54.41 2.81 3
 -4 25 -3 50.21 2.79 2
 5 -25 3 1.89 1.14 1
 5 25 3 0.27 0.99 3
 -5 25 -3 2.49 1.16 2
 5 -26 -3 12.24 1.64 1
 5 26 -3 11.99 1.58 3
 -5 -26 3 11.07 1.77 2
 -4 -26 3 1.44 1.14 2
 4 -26 -3 3.89 1.15 1
 3 -26 -3 6.37 1.26 1
 -3 -26 3 5.85 1.34 2
 2 -26 -3 4.13 1.07 1
 -2 -26 3 3.42 1.23 2
 -1 -26 3 2.44 1.06 2
 0 26 -3 11.65 1.61 2
 -1 26 -3 0.66 1.02 2
 1 26 3 1.76 1.02 3
 2 26 3 21.86 1.82 3
 -2 26 -3 21.43 2.03 2
 2 -26 3 24.95 2.02 1
 3 -26 3 9.87 1.5 1
 3 26 3 12.72 1.61 3
 -3 26 -3 13.43 1.72 2
 -4 26 -3 11.8 1.69 2
 4 26 3 15.85 1.77 3
 4 -26 3 13.85 1.77 1
 -3 -27 3 0.14 1.06 2
 3 -27 -3 0.83 0.9 1
 -2 -27 3 1.81 1.18 2
 -1 -27 3 10.31 1.58 2
 0 27 -3 5.26 1.39 2
 -1 27 -3 -1.2 0.83 2
 -2 27 -3 1.01 1.09 2
 2 27 3 0.64 1.03 3
 14 0 -4 5.19 1.36 3
 -14 0 4 8.47 1.6 2
 -13 0 4 53.64 2.88 2
 13 0 -4 50.64 2.71 3
 -12 0 4 3.67 1.14 2
 12 0 -4 2.39 1.08 3
 11 0 -4 170.13 4.49 3
 -11 0 4 164.25 4.6 2
 -10 0 4 9.15 1.12 2
 10 0 -4 7.77 1.1 3
 9 0 -4 0.97 0.5 1
 9 0 -4 0.43 0.64 3
 -9 0 4 1.04 0.66 2
 8 0 -4 469 7.75 1
 -8 0 4 479.37 8.41 2
 8 0 -4 466.81 8.28 3
 7 0 -4 6.85 0.63 1
 -7 0 4 6.66 0.79 2
 7 0 -4 5.17 0.73 3
 -6 0 4 447.96 7.49 2
 6 0 -4 444.25 7.53 3
 6 0 -4 446.07 7.16 1
 5 0 -4 27.23 0.96 1
 5 0 -4 26.96 1.16 3
 -5 0 4 29.37 1.12 2
 4 0 -4 366.02 5.86 1
 4 0 -4 367.52 6.07 3
 -4 0 4 364.74 5.9 2
 3 0 -4 549.41 8.41 1
 -3 0 4 551.67 8.31 2
 -2 0 4 663.74 9.81 2
 2 0 -4 671.03 10.07 1
 1 0 -4 2228.46 32.39 1
 1 0 -4 2219.81 32.4 2
 1 0 -4 2297.99 31.8 3
 0 0 -4 2003.95 28.78 1
 0 0 -4 1952.22 28.65 2
 0 0 4 2014.79 28.17 3
 1 0 4 4139.06 60.11 3
 -1 0 -4 4308.45 61.91 2
 -1 0 -4 4234.64 62.19 1
 -2 0 -4 351.73 5.63 1
 -2 0 -4 346.26 5.59 2
 2 0 4 340.78 5.25 3
 3 0 4 27.64 0.98 1
 -3 0 -4 27.84 1.06 2
 3 0 4 29.2 0.86 3
 4 0 4 27.59 1.02 1
 4 0 4 32.66 0.99 3
 -4 0 -4 29.76 1.22 2
 5 0 4 129.84 2.56 3
 -5 0 -4 124.93 3.02 2
 5 0 4 126.61 2.68 1
 -6 0 -4 904.58 14.54 2
 6 0 4 905.06 14.02 1
 6 0 4 936.95 13.68 3
 7 0 4 16.85 0.98 3
 -7 0 -4 16.46 1.25 2
 7 0 4 15.74 1.08 1
 8 0 4 452.12 7.78 1
 8 0 4 453.22 7.59 3
 -8 0 -4 438.73 8.45 2
 9 0 4 146.67 3.42 3
 9 0 4 148.97 3.56 1
 -9 0 -4 135.97 4.01 2
 -10 0 -4 0.09 0.69 2
 10 0 4 -0.56 0.63 3
 -11 0 -4 45.27 2.51 2
 -12 0 -4 -0.9 0.85 2
 -13 0 -4 9.27 1.63 2
 -14 0 -4 4.67 1.48 2
 -14 -1 4 35.13 2.55 2
 14 1 -4 33.95 2.4 3
 -14 1 4 26.07 2.2 2
 -13 1 4 5.06 1.27 2
 13 1 -4 4.28 1.22 3
 13 -1 -4 4.46 1.23 3
 -13 -1 4 3.33 1.12 2
 -12 -1 4 19.75 1.75 2
 12 -1 -4 21.76 1.76 3
 -12 1 4 19.06 1.76 2
 12 1 -4 16.96 1.65 3
 11 1 -4 40.16 2.16 3
 -11 1 4 45.5 2.24 2
 -11 -1 4 39.06 2.15 2
 11 -1 -4 40.83 2.09 3
 10 1 -4 0.41 0.69 3
 -10 -1 4 1.44 0.75 2
 10 -1 -4 1.13 0.76 3
 -10 1 4 0.38 0.7 2
 9 -1 -4 9.49 1.04 3
 9 -1 -4 11.25 0.91 1
 -9 -1 4 10.94 1.11 2
 -9 1 4 9.57 1.06 2
 9 1 -4 9.64 1.06 3
 8 -1 -4 70.82 2.38 3
 8 1 -4 76.84 2.43 3
 8 1 -4 76.29 1.91 1
 8 -1 -4 73.94 2.04 1
 -8 -1 4 73.29 2.4 2
 -8 1 4 72.95 2.4 2
 7 -1 -4 5.03 0.73 3
 7 1 -4 4.47 0.51 1
 -7 1 4 3.94 0.65 2
 7 -1 -4 3.5 0.58 1
 -7 -1 4 5.54 0.76 2
 7 1 -4 3.76 0.71 3
 6 -1 -4 0.93 0.51 3
 6 -1 -4 1.26 0.41 1
 -6 1 4 1.53 0.46 2
 6 1 -4 1.09 0.49 3
 6 1 -4 1.14 0.34 1
 -6 -1 4 0.91 0.46 2
 -5 1 4 36.97 1.25 2
 5 -1 -4 36.53 1.34 3
 5 1 -4 35.78 1.07 1
 -5 -1 4 37.13 1.28 2
 5 1 -4 37.47 1.38 3
 5 -1 -4 37.19 1.18 1
 -4 1 4 59.43 1.46 2
 -4 -1 4 59.37 1.53 2
 4 -1 -4 56.14 1.46 1
 4 1 -4 59.66 1.39 1
 4 1 -4 61.28 1.65 3
 3 -1 -4 555.76 8.54 1
 3 1 -4 544.57 8.53 3
 3 -1 -4 557.06 8.59 3
 -3 -1 4 568.79 8.46 2
 -3 1 4 557.31 8.34 2
 3 1 -4 556.99 8.48 1
 -2 -1 4 1297.39 18.77 2
 -2 1 4 1318.82 18.8 2
 2 -1 -4 1309.27 18.8 3
 2 -1 -4 1305.74 19.05 1
 2 1 -4 1294.78 19.02 1
 2 1 -4 1292.24 18.72 3
 1 1 -4 202.1 3.28 2
 1 -1 -4 203.62 3.5 1
 1 1 -4 199.62 3.44 1
 1 -1 -4 204.2 3.16 2
 1 1 -4 206.86 3.38 3
 -1 1 4 200.96 3.41 3
 0 -1 -4 1476.94 21.36 2
 0 1 -4 1487.36 21.26 2
 0 1 4 1479.16 21.05 3
 0 1 -4 1468.35 21.51 1
 0 -1 4 1477.01 21.02 3
 0 -1 -4 1477.29 21.54 1
 -1 1 -4 63.56 1.45 2
 1 1 4 66.88 1.38 3
 -1 1 -4 65.23 1.52 1
 -1 -1 -4 66.99 1.38 2
 -1 -1 -4 64.44 1.51 1
 1 -1 4 66.63 1.25 3
 -2 1 -4 321.79 5.32 2
 -2 -1 -4 324.72 5.26 2
 2 1 4 328.63 5.04 3
 2 -1 4 320.09 4.87 3
 -2 -1 -4 325.81 5.3 1
 -2 1 -4 323.6 5.32 1
 -3 1 -4 24.52 1.03 2
 -3 -1 -4 26.43 0.93 1
 3 -1 4 24.63 0.92 1
 3 1 4 25.97 0.86 3
 3 -1 4 25.18 0.75 3
 -3 -1 -4 26 1.02 2
 -4 1 -4 3.69 0.57 2
 4 -1 4 3.64 0.39 3
 4 1 4 3.55 0.45 1
 -4 -1 -4 3.52 0.54 2
 4 -1 4 5.81 0.56 1
 4 1 4 3.64 0.46 3
 5 -1 4 12.38 0.7 3
 -5 -1 -4 13 0.94 2
 -5 1 -4 12.28 0.95 2
 5 1 4 11.49 0.76 3
 5 1 4 12.99 0.78 1
 5 -1 4 11.44 0.83 1
 6 1 4 1.87 0.5 1
 6 -1 4 0.52 0.5 1
 6 -1 4 2.12 0.46 3
 -6 1 -4 0.33 0.53 2
 -6 -1 -4 1.15 0.54 2
 6 1 4 1.52 0.49 3
 7 1 4 47.88 1.64 3
 7 1 4 49.19 1.69 1
 7 -1 4 50.34 1.58 3
 7 -1 4 50.72 1.8 1
 -7 -1 -4 50.79 2.05 2
 -7 1 -4 51.85 2.07 2
 -8 -1 -4 32 1.85 2
 8 -1 4 32.95 1.6 1
 8 1 4 33.84 1.49 1
 8 1 4 31.72 1.47 3
 8 -1 4 31.53 1.39 3
 9 -1 4 30.93 1.47 3
 -9 1 -4 28.34 1.81 2
 -9 -1 -4 31.76 1.88 2
 9 -1 4 31.16 1.64 1
 9 1 4 30.24 1.56 1
 9 1 4 31.21 1.53 3
 -10 1 -4 110.68 3.75 2
 10 1 4 113.17 3.14 3
 10 -1 4 109.67 3.2 1
 -11 1 -4 5.85 1.19 2
 -11 -1 -4 3.37 1.13 2
 -12 -1 -4 5.48 1.32 2
 -12 1 -4 3.52 1.18 2
 -13 -1 -4 3.76 1.28 2
 -13 1 -4 5.5 1.43 2
 -14 -1 -4 -0.73 0.96 2
 -14 1 -4 -0.01 1.04 2
 14 2 -4 2.17 1.21 3
 -14 2 4 0.14 0.95 2
 -14 -2 4 3.03 1.23 2
 -13 2 4 1.63 1.05 2
 13 -2 -4 0.19 0.97 3
 13 2 -4 0.93 1.04 3
 -13 -2 4 -0.2 0.96 2
 12 2 -4 54.08 2.61 3
 12 -2 -4 49.95 2.5 3
 -12 -2 4 50.8 2.59 2
 -12 2 4 46.89 2.5 2
 -11 -2 4 2.2 0.96 2
 -11 2 4 0.19 0.71 2
 11 2 -4 2.77 0.96 3
 11 -2 -4 1 0.83 3
 10 -2 -4 4.82 0.95 3
 10 2 -4 5.24 0.99 3
 10 -2 -4 6.65 0.81 1
 -10 -2 4 6.47 1.07 2
 -10 2 4 6.36 1.01 2
 9 2 -4 2.51 0.81 3
 9 -2 -4 0.84 0.77 3
 9 -2 -4 2.62 0.67 1
 -9 2 4 2.18 0.71 2
 -9 -2 4 1.28 0.78 2
 8 2 -4 7.75 0.97 3
 8 -2 -4 6.78 0.78 1
 8 -2 -4 7.45 0.9 3
 -8 -2 4 7.41 0.95 2
 8 2 -4 7.42 0.62 1
 -8 2 4 7.68 0.92 2
 7 -2 -4 124.78 3.08 3
 7 2 -4 127.1 3.11 3
 7 -2 -4 121.47 2.8 1
 -7 2 4 121.47 2.96 2
 7 2 -4 126.11 2.5 1
 -7 -2 4 123.84 3.08 2
 -6 -2 4 3.8 0.63 2
 6 2 -4 2.96 0.39 1
 6 -2 -4 2.12 0.54 3
 6 -2 -4 1.98 0.49 1
 -6 2 4 2.54 0.52 2
 6 2 -4 1.64 0.53 3
 5 -2 -4 295.34 5.25 3
 -5 -2 4 294.2 5.2 2
 5 2 -4 300.14 4.79 1
 -5 2 4 293.25 5.05 2
 5 -2 -4 285.73 5.04 1
 4 2 -4 2.46 0.45 3
 4 2 -4 1.66 0.3 1
 -4 -2 4 1.95 0.4 2
 4 -2 -4 2.1 0.46 3
 -4 2 4 1.46 0.34 2
 4 -2 -4 1.65 0.38 1
 3 2 -4 1931.76 27.92 1
 -3 2 4 1950.03 27.63 2
 -3 -2 4 1929.06 27.75 2
 3 2 -4 1945.39 27.59 3
 3 -2 -4 1900.35 27.62 3
 3 -2 -4 1946.98 28.02 1
 2 2 -4 85.06 1.71 1
 2 2 -4 81.56 1.77 3
 -2 -2 4 84.67 1.74 2
 -2 2 4 87.36 1.88 3
 2 2 -4 88.92 1.76 2
 -2 2 4 85.58 1.48 2
 2 -2 -4 85.72 1.83 1
 1 2 -4 287.99 4.64 1
 -1 2 4 286.17 4.64 3
 1 -2 -4 286.84 4.71 1
 1 2 -4 287.77 4.56 2
 1 2 -4 283.99 4.5 3
 0 2 4 249.54 4.05 3
 0 2 -4 241.31 4.11 1
 0 2 -4 251.13 4.07 2
 0 -2 -4 248.76 4.18 1
 0 2 -4 248.01 3.88 3
 0 -2 -4 251.84 3.83 2
 -1 -2 -4 3.36 0.31 2
 -1 2 -4 3.21 0.39 1
 -1 -2 -4 3.43 0.4 1
 -1 2 -4 3.02 0.37 2
 1 -2 4 3.44 0.28 3
 1 2 4 3.52 0.35 3
 -2 -2 -4 11.43 0.6 1
 -2 -2 -4 11.01 0.58 2
 -2 2 -4 11.11 0.65 2
 2 -2 4 10.86 0.4 3
 2 2 4 11.83 0.62 3
 2 -2 4 13.73 0.66 1
 -3 -2 -4 664.03 10.3 1
 -3 2 -4 680.57 10.53 2
 3 -2 4 662.61 10.38 1
 -3 -2 -4 684.9 10.41 2
 3 2 4 693.13 10.1 3
 3 -2 4 672.51 9.79 3
 4 2 4 220.82 3.84 3
 4 2 4 214.53 3.84 1
 -4 2 -4 213.77 4.21 2
 -4 -2 -4 215.62 4.14 2
 4 -2 4 215.5 3.99 1
 4 -2 4 220.35 3.52 3
 5 2 4 24.58 0.99 1
 -5 -2 -4 23.88 1.2 2
 5 -2 4 25.4 1.12 1
 5 2 4 25.96 1.08 3
 5 -2 4 26.4 0.91 3
 6 -2 4 29 1.04 3
 6 2 4 29.33 1.24 3
 -6 -2 -4 31.46 1.52 2
 -6 2 -4 29.11 1.45 2
 6 -2 4 28.65 1.33 1
 6 2 4 29.6 1.17 1
 7 2 4 182.1 3.75 3
 -7 2 -4 182.08 4.32 2
 -7 -2 -4 183.16 4.29 2
 7 -2 4 179.34 3.94 1
 7 2 4 186.79 3.67 1
 7 -2 4 181.66 3.5 3
 8 -2 4 162.63 3.39 3
 -8 -2 -4 162.25 4.2 2
 -8 2 -4 155.58 4.15 2
 8 -2 4 159.83 3.73 1
 8 2 4 163.78 3.52 1
 8 2 4 161.96 3.64 3
 -9 2 -4 12.65 1.31 2
 9 2 4 14.66 1.18 3
 -9 -2 -4 13.83 1.36 2
 9 -2 4 14.59 1.08 3
 9 -2 4 12.95 1.21 1
 -10 -2 -4 22.32 1.75 2
 -10 2 -4 21.74 1.71 2
 10 -2 4 18.98 1.5 1
 10 2 4 24.84 1.51 3
 -11 -2 -4 32.96 2.22 2
 -11 2 -4 26.14 1.97 2
 11 2 4 33.75 1.85 3
 -12 -2 -4 11.33 1.56 2
 -12 2 -4 10.49 1.55 2
 -13 2 -4 0.23 1.02 2
 -13 -2 -4 1.76 1.1 2
 -14 -2 -4 3 1.24 2
 -14 2 -4 1.08 1.09 2
 14 3 -4 -1.08 0.91 3
 -14 -3 4 0.95 1.07 2
 -14 3 4 -0.59 0.98 2
 13 -3 -4 10.45 1.47 3
 13 3 -4 10.64 1.48 3
 -13 3 4 10.58 1.46 2
 -13 -3 4 10.59 1.5 2
 -12 3 4 29.57 1.98 2
 -12 -3 4 28.47 2.1 2
 12 3 -4 30.55 2.07 3
 12 -3 -4 28.21 1.98 3
 11 -3 -4 6.91 1.12 3
 11 3 -4 6.81 1.12 3
 -11 -3 4 7.13 1.2 2
 -11 3 4 8.96 1.25 2
 10 -3 -4 51.63 2.2 3
 10 3 -4 48.57 2.19 3
 -10 -3 4 48.27 2.26 2
 10 -3 -4 50.96 1.94 1
 -10 3 4 48.93 2.16 2
 9 -3 -4 1 0.71 3
 -9 -3 4 0.4 0.66 2
 -9 3 4 0.99 0.66 2
 9 -3 -4 0.26 0.54 1
 9 3 -4 0.23 0.64 3
 8 -3 -4 95.62 2.76 3
 -8 3 4 92.5 2.66 2
 8 3 -4 93.77 2.75 3
 8 -3 -4 92.91 2.5 1
 -8 -3 4 92.44 2.78 2
 -7 3 4 1.19 0.49 2
 7 3 -4 1.51 0.6 3
 7 -3 -4 0.55 0.49 1
 7 3 -4 2.05 0.37 1
 7 -3 -4 1.42 0.58 3
 -7 -3 4 -0.01 0.52 2
 -6 -3 4 27.33 1.29 2
 6 3 -4 29.38 1.3 3
 6 3 -4 28.23 0.89 1
 6 -3 -4 28.44 1.18 1
 6 -3 -4 28.03 1.27 3
 -6 3 4 27.49 1.18 2
 -5 -3 4 126.1 2.83 2
 5 -3 -4 126.98 2.86 3
 5 3 -4 128.54 2.36 1
 5 3 -4 130.84 2.88 3
 -5 3 4 131.68 2.68 2
 5 -3 -4 128.46 2.75 1
 4 -3 -4 375.16 6.3 1
 4 3 -4 383.35 5.96 1
 -4 3 4 382.32 6.07 2
 4 -3 -4 386.53 6.38 3
 -4 -3 4 388.35 6.34 2
 3 -3 -4 768.79 11.48 3
 -3 -3 4 770.51 11.46 2
 3 -3 -4 759.4 11.54 1
 3 3 -4 756.83 11.29 1
 3 3 -4 748.94 11.37 3
 -3 3 4 757.84 11.15 2
 -2 3 4 107.83 2.26 3
 2 3 -4 106.96 2.16 3
 2 3 -4 110.31 2.05 1
 -2 3 4 110.41 1.82 2
 2 -3 -4 109.67 2.23 1
 2 3 -4 112.56 2.19 2
 1 3 -4 21.54 0.7 3
 1 3 -4 20.09 0.75 2
 -1 3 4 20 0.81 3
 1 3 -4 17.95 0.69 1
 1 -3 -4 19.28 0.76 1
 0 3 -4 168.97 2.76 3
 0 -3 -4 167.37 2.68 2
 0 3 -4 171.98 3.03 1
 0 -3 -4 170.12 3.09 1
 1 -3 4 93.09 1.55 3
 -1 -3 -4 91.57 1.94 1
 -1 -3 -4 90.61 1.73 2
 1 3 4 92.96 1.9 3
 2 -3 4 49 1.33 1
 -2 3 -4 45.89 1.36 2
 -2 -3 -4 46.19 1.22 2
 2 -3 4 46.7 0.84 3
 -2 -3 -4 46.08 1.25 1
 2 3 4 46.29 1.24 3
 3 3 4 1.64 0.38 3
 -3 3 -4 2.18 0.46 2
 -3 -3 -4 1.83 0.35 1
 -3 -3 -4 1.59 0.39 2
 3 -3 4 2.2 0.22 3
 3 -3 4 1.35 0.38 1
 -4 3 -4 846.45 13.09 2
 -4 -3 -4 837.86 12.93 2
 -4 -3 -4 843.94 12.65 1
 4 -3 4 828.23 12.88 1
 4 3 4 861.07 12.58 3
 4 -3 4 823.87 12.09 3
 5 3 4 198.72 3.61 1
 -5 3 -4 192.92 4.16 2
 5 3 4 200.19 3.77 3
 -5 -3 -4 194.98 4.08 2
 5 -3 4 202.41 3.33 3
 5 -3 4 196.21 3.91 1
 6 3 4 14.87 0.99 3
 6 -3 4 15.03 0.76 3
 -6 -3 -4 15.36 1.11 2
 -6 3 -4 14.45 1.1 2
 6 -3 4 15.16 1.05 1
 6 3 4 15.55 0.86 1
 -7 -3 -4 142.36 3.68 2
 7 -3 4 152.11 2.96 3
 -7 3 -4 141.67 3.73 2
 7 3 4 149.79 3.06 1
 7 -3 4 140.83 3.39 1
 7 3 4 147.11 3.3 3
 8 -3 4 232.21 4.29 3
 8 -3 4 227.69 4.89 1
 8 3 4 229.19 4.41 1
 -8 -3 -4 235.87 5.31 2
 -8 3 -4 222.04 5.25 2
 8 3 4 225.92 4.65 3
 9 -3 4 1.5 0.82 1
 -9 3 -4 2.23 0.84 2
 -9 -3 -4 3.64 0.9 2
 9 3 4 2.73 0.76 3
 -10 3 -4 0.75 0.8 2
 10 3 4 0.77 0.69 3
 10 -3 4 1.21 0.88 1
 -10 -3 -4 1 0.85 2
 -11 3 -4 4.12 1.09 2
 11 3 4 4.81 0.96 3
 -11 -3 -4 4.39 1.2 2
 -12 3 -4 2.29 1.12 2
 -12 -3 -4 0.62 0.95 2
 -13 3 -4 7.13 1.53 2
 -13 -3 -4 5.46 1.41 2
 -14 -3 -4 -0.04 1.03 2
 -14 3 -4 0.71 1.1 2
 -14 4 4 15.21 1.74 2
 -14 -4 4 15.37 1.9 2
 14 4 -4 13.24 1.76 3
 13 4 -4 -0.47 0.99 3
 -13 -4 4 -0.41 0.91 2
 -13 4 4 -0.48 0.86 2
 -12 4 4 -0.98 0.7 2
 -12 -4 4 0.9 0.93 2
 12 4 -4 -0.31 0.89 3
 12 -4 -4 0.62 0.88 3
 11 -4 -4 -0.16 0.77 3
 -11 4 4 -0.27 0.76 2
 -11 -4 4 -0.28 0.67 2
 11 4 -4 0.11 0.79 3
 10 -4 -4 0 0.67 3
 -10 4 4 0.12 0.61 2
 10 -4 -4 1.89 0.66 1
 -10 -4 4 0.41 0.72 2
 10 4 -4 1.84 0.83 3
 -9 -4 4 51.52 2.21 2
 9 -4 -4 51.69 1.94 1
 -9 4 4 50.5 2.03 2
 9 4 -4 51.38 2.14 3
 9 -4 -4 52.93 2.11 3
 8 -4 -4 13.88 1.1 1
 -8 -4 4 13.51 1.16 2
 -8 4 4 15.69 1.17 2
 8 -4 -4 12.88 1.09 3
 8 4 -4 13 1.16 3
 7 4 -4 5.57 0.45 1
 7 -4 -4 6.68 0.82 3
 7 -4 -4 6.91 0.79 1
 7 4 -4 5.91 0.83 3
 -7 -4 4 6.21 0.81 2
 -7 4 4 8.12 0.81 2
 6 -4 -4 18.17 1.02 1
 6 4 -4 20.12 1.16 3
 -6 -4 4 16.89 1.05 2
 6 4 -4 19.38 0.68 1
 -6 4 4 18.62 1 2
 6 -4 -4 20.39 1.13 3
 5 -4 -4 277.45 5.03 1
 5 4 -4 274.43 4.41 1
 -5 4 4 274.82 4.81 2
 5 -4 -4 282.94 5.08 3
 -5 -4 4 283.98 5.1 2
 5 4 -4 276.55 5.05 3
 4 4 -4 110.13 2.03 1
 4 -4 -4 111.05 2.51 3
 -4 4 4 114.52 2.25 2
 4 4 -4 114.94 2.54 3
 -4 -4 4 111.55 2.51 2
 4 -4 -4 118.28 2.54 1
 3 -4 -4 329.25 5.43 1
 3 4 -4 317.38 5.31 3
 -3 4 4 321.6 4.99 2
 3 4 -4 318.71 5 1
 -3 -4 4 315.88 5.33 2
 -3 4 4 318.86 5.37 3
 -2 4 4 35.57 0.75 2
 2 4 -4 33.87 1.03 3
 2 4 -4 37.15 1.12 2
 -2 4 4 34.83 1.15 3
 2 4 -4 36.29 0.94 1
 1 4 -4 4.33 0.37 3
 1 4 -4 4.71 0.38 1
 1 -4 -4 4.29 0.45 1
 1 4 -4 4.69 0.43 2
 -1 4 4 4.74 0.48 3
 0 -4 -4 0.52 0.3 1
 0 -4 -4 1.17 0.2 2
 0 -4 4 1.09 0.3 1
 0 4 4 0.62 0.32 3
 0 4 -4 0.67 0.32 2
 -1 -4 -4 275.74 4.64 1
 -1 4 -4 280.34 4.73 2
 1 4 4 274.44 4.56 3
 -1 -4 -4 271.9 4.36 2
 1 -4 4 272.54 4.62 1
 -1 4 -4 283.09 4.21 3
 -2 4 -4 9.71 0.69 2
 -2 -4 -4 9.09 0.55 2
 2 -4 4 10.18 0.67 1
 2 4 4 9.96 0.64 3
 -2 -4 -4 10.04 0.6 1
 -3 -4 -4 141.34 2.89 2
 -3 4 -4 145.68 3.09 2
 -3 -4 -4 148.24 2.81 1
 3 4 4 147.1 2.87 3
 3 -4 4 147.84 2.98 1
 -4 -4 -4 64.57 1.84 2
 -4 4 -4 61.17 1.9 2
 4 4 4 62.34 1.72 3
 4 -4 4 62.03 1.78 1
 -4 -4 -4 64.63 1.57 1
 4 -4 4 61.19 1.18 3
 -5 -4 -4 13.59 0.97 2
 5 -4 4 10.18 0.85 1
 5 4 4 12.15 0.72 1
 -5 4 -4 12.24 0.98 2
 5 -4 4 12.63 0.57 3
 5 4 4 12.3 0.85 3
 6 -4 4 4.51 0.47 3
 6 4 4 5.29 0.67 3
 6 4 4 4.91 0.55 1
 -6 -4 -4 5.13 0.76 2
 -6 4 -4 4.99 0.78 2
 6 -4 4 5.5 0.76 1
 -7 4 -4 53.01 2.15 2
 -7 -4 -4 53.78 2.13 2
 7 4 4 58.82 1.64 1
 7 -4 4 55.76 2.08 1
 7 -4 4 55.53 1.51 3
 7 4 4 55.3 1.9 3
 -8 4 -4 93.7 3.07 2
 -8 -4 -4 90.25 2.99 2
 8 -4 4 93.75 2.87 1
 8 4 4 93.39 2.67 3
 -9 -4 -4 11.49 1.29 2
 9 -4 4 10.57 1.19 1
 9 4 4 11.14 1.08 3
 -9 4 -4 11.66 1.3 2
 10 -4 4 17.73 1.49 1
 10 4 4 16.03 1.33 3
 -10 4 -4 17.33 1.6 2
 -10 -4 -4 20.46 1.66 2
 -11 -4 -4 4.76 1.16 2
 11 -4 4 6.23 1.14 1
 11 4 4 5.52 1.07 3
 -11 4 -4 6.62 1.25 2
 -12 4 -4 0.69 0.93 2
 -12 -4 -4 0.32 0.87 2
 -13 -4 -4 1.37 1.07 2
 -13 4 -4 1.77 1.08 2
 14 5 -4 0.73 1.08 3
 -14 -5 4 -0.29 1.04 2
 -14 5 4 1.34 1.11 2
 -13 5 4 -0.1 0.92 2
 -13 -5 4 -0.82 0.9 2
 13 5 -4 -1.38 0.9 3
 -12 -5 4 24.18 1.91 2
 12 -5 -4 23.77 1.81 3
 12 5 -4 23.32 1.88 3
 -12 5 4 24.88 1.89 2
 11 -5 -4 19.47 1.42 1
 11 -5 -4 16.71 1.45 3
 11 5 -4 19.83 1.66 3
 -11 -5 4 18.25 1.65 2
 -11 5 4 17.68 1.54 2
 -10 -5 4 104.74 3.4 2
 -10 5 4 96.54 3.1 2
 10 -5 -4 102.9 2.99 1
 10 -5 -4 100.73 3.1 3
 10 5 -4 103.32 3.28 3
 -9 5 4 4.28 0.84 2
 -9 -5 4 4.8 0.93 2
 9 5 -4 5.74 0.99 3
 9 -5 -4 4.89 0.88 3
 9 -5 -4 2.65 0.76 1
 -8 5 4 70.56 2.31 2
 8 5 -4 75.7 2.52 3
 8 -5 -4 73.58 2.37 3
 8 -5 -4 73.37 2.35 1
 7 -5 -4 107.31 2.8 1
 7 -5 -4 102.87 2.74 3
 -7 5 4 108.62 2.73 2
 -7 -5 4 106.24 2.89 2
 7 5 -4 102.98 2.83 3
 -6 -5 4 17.5 1.08 2
 6 -5 -4 16.92 1.1 1
 6 5 -4 17.01 1.06 3
 6 -5 -4 15.12 0.98 3
 6 5 -4 16.84 0.55 1
 -6 5 4 17.25 0.96 2
 5 -5 -4 50.06 1.61 3
 -5 5 4 48.53 1.43 2
 5 5 -4 49.67 1.03 1
 -5 -5 4 50.54 1.67 2
 5 -5 -4 51.91 1.66 1
 4 5 -4 1.25 0.44 3
 -4 5 4 0.38 0.28 2
 -4 -5 4 1.44 0.44 2
 4 5 -4 1.11 0.22 1
 -4 5 4 1.04 0.44 3
 4 -5 -4 0.69 0.4 1
 3 -5 -4 281.46 4.91 1
 3 5 -4 277.7 4.79 3
 3 5 -4 276.96 4.39 1
 -3 5 4 278.72 4.45 2
 -3 -5 4 286.08 4.89 2
 -3 5 4 276.85 4.83 3
 2 5 -4 163.25 2.81 1
 -2 5 4 165.25 2.65 2
 2 -5 -4 169.81 3.17 1
 2 5 -4 161.57 2.99 3
 2 5 -4 160.64 3.13 2
 -2 5 4 163.83 3.13 3
 -2 -5 4 165.09 2.81 1
 1 5 -4 59.02 1.35 3
 -1 -5 4 58.41 1.35 1
 -1 5 4 60.84 1.08 2
 -1 5 4 61.11 1.56 3
 0 -5 4 134.57 2.56 1
 0 -5 -4 139.18 2.68 1
 0 5 -4 137.31 2.73 2
 0 -5 -4 136.49 2.27 2
 0 5 4 136 2.65 3
 0 5 -4 131.95 2.28 3
 -1 5 -4 1599.98 23.06 3
 -1 5 -4 1579.81 23.31 2
 1 5 4 1624.28 22.97 3
 -1 -5 -4 1584.48 23.35 1
 1 -5 4 1613.64 23.35 1
 -1 -5 -4 1600.29 22.96 2
 2 -5 4 147.48 2.94 1
 -2 5 -4 146.38 3.05 2
 -2 -5 -4 147.6 2.84 1
 2 5 4 153.68 2.91 3
 -2 -5 -4 149.31 2.79 2
 -3 -5 -4 588.11 9.13 2
 -3 -5 -4 578.38 9.02 1
 3 5 4 589.88 9.06 3
 -3 5 -4 575.38 9.38 2
 4 -5 4 23.13 1.13 1
 -4 -5 -4 23.48 0.9 1
 4 -5 4 20.86 0.54 3
 4 5 4 22.79 1.1 3
 -4 -5 -4 23.18 1.08 2
 5 -5 4 90.89 2.45 1
 -5 5 -4 92.3 2.59 2
 5 5 4 92.14 2.32 3
 5 5 4 87.6 1.98 1
 5 -5 4 92.68 1.7 3
 6 5 4 49.08 1.76 3
 -6 5 -4 52.44 2 2
 6 5 4 51.18 1.42 1
 6 -5 4 55.26 1.97 1
 6 -5 4 53.19 1.29 3
 -6 -5 -4 51.51 1.93 2
 7 -5 4 23.27 1.43 1
 7 5 4 24.79 1.07 1
 7 -5 4 26.5 1.01 3
 -7 5 -4 22.81 1.53 2
 -7 -5 -4 24.94 1.49 2
 7 5 4 24.82 1.32 3
 8 -5 4 46.17 2.01 1
 -8 5 -4 43.93 2.1 2
 8 5 4 42.65 1.79 3
 -8 -5 -4 44.34 2.08 2
 9 -5 4 9.48 1.2 1
 9 5 4 10.2 1.09 3
 -9 5 -4 9.47 1.22 2
 -9 -5 -4 9.82 1.26 2
 -10 -5 -4 3.03 1.05 2
 10 -5 4 4.11 1.05 1
 10 5 4 2.45 0.84 3
 -10 5 -4 6.78 1.18 2
 11 5 4 1.19 0.82 3
 -11 5 -4 0.4 0.88 2
 -11 -5 -4 -0.82 0.75 2
 11 -5 4 -1.33 0.74 1
 -12 5 -4 3.76 1.22 2
 -12 -5 -4 3.99 1.25 2
 12 5 4 4.15 1.04 3
 -13 -5 -4 17.4 2.02 2
 -13 5 -4 21.3 2.15 2
 -14 6 4 0.91 1.09 2
 -14 -6 4 2.83 1.17 2
 14 6 -4 1.75 1.22 3
 -13 6 4 1.22 0.99 2
 -13 -6 4 4.07 1.24 2
 13 6 -4 2.22 1.08 3
 -12 -6 4 1.24 0.97 2
 -12 6 4 1.48 0.97 2
 12 6 -4 1.05 1.03 3
 -11 6 4 0.42 0.79 2
 -11 -6 4 -0.31 0.78 2
 11 -6 -4 -0.32 0.72 3
 11 6 -4 0.15 0.83 3
 11 -6 -4 0.29 0.71 1
 10 -6 -4 51.76 2.16 1
 10 -6 -4 55.68 2.27 3
 -10 6 4 56.47 2.33 2
 10 6 -4 53.09 2.4 3
 -10 -6 4 54 2.46 2
 -9 6 4 2.93 0.76 2
 -9 -6 4 2.81 0.84 2
 9 -6 -4 2.33 0.77 3
 9 -6 -4 1.93 0.72 1
 9 6 -4 3.43 0.85 3
 8 -6 -4 283.55 5.76 1
 -8 -6 4 291.58 6 2
 -8 6 4 285.53 5.69 2
 8 6 -4 302.97 5.97 3
 8 -6 -4 292.17 5.73 3
 7 -6 -4 127.66 3.12 3
 7 6 -4 131.47 3.3 3
 -7 6 4 128.82 3.07 2
 7 -6 -4 125.81 3.19 1
 -7 -6 4 131.19 3.34 2
 -6 6 4 26.03 1.26 3
 6 6 -4 25.48 1.29 3
 -6 -6 4 26.63 1.34 2
 -6 6 4 26.92 1.17 2
 6 -6 -4 26.33 1.31 1
 5 -6 -4 48.37 1.69 1
 -5 6 4 50.16 1.46 2
 -5 -6 4 49.29 1.69 2
 5 6 -4 46.67 1.65 3
 -5 6 4 52.66 1.67 3
 -4 6 4 61.48 1.51 2
 4 -6 -4 59.85 1.79 1
 -4 6 4 61.14 1.75 3
 -4 -6 4 60.89 1.81 2
 -4 -6 4 59.98 1.16 1
 -3 6 4 310.77 4.92 2
 3 6 -4 317.11 5.27 3
 3 -6 -4 309.76 5.42 1
 -3 6 4 308.28 5.32 3
 -3 -6 4 303.39 4.79 1
 -3 -6 4 307.37 5.37 2
 -2 6 4 194.59 3.18 2
 -2 6 4 200.66 3.67 3
 2 6 -4 198.56 3.52 3
 2 -6 -4 201.45 3.73 1
 -2 -6 4 191.27 3.27 1
 2 6 -4 199.04 3.71 2
 -1 6 4 598.05 8.81 2
 1 6 -4 586.64 8.92 3
 1 -6 -4 599.06 9.34 1
 -1 -6 4 597.5 9.08 1
 1 6 -4 587.8 9.33 2
 -1 6 4 623.54 9.26 3
 0 -6 -4 24.66 0.7 2
 0 6 -4 24.93 1.01 2
 0 6 4 25.46 1 3
 0 6 -4 25.07 0.72 3
 0 -6 4 24.48 0.89 1
 0 -6 -4 24.44 0.93 1
 -1 -6 -4 26.1 0.84 2
 -1 6 -4 25.99 0.61 3
 -1 -6 -4 25.28 0.93 1
 1 -6 4 24.84 0.99 1
 -2 -6 -4 97.75 2.13 1
 -2 6 -4 102.46 2.41 2
 -2 -6 -4 98.95 2.11 2
 2 -6 4 101.42 2.28 1
 2 6 4 97.11 2.22 3
 3 -6 4 233.59 4.39 1
 -3 -6 -4 234.07 4.1 1
 -3 -6 -4 234.07 4.25 2
 4 6 4 21.77 1.09 3
 -4 -6 -4 23.71 1.12 2
 -4 6 -4 23.3 1.2 2
 -4 -6 -4 24.95 0.93 1
 4 -6 4 22.61 1.18 1
 5 -6 4 129.7 3.08 1
 5 6 4 122.62 2.88 3
 5 -6 4 124.4 2.08 3
 -5 -6 -4 121.78 2.98 2
 -5 -6 -4 123.47 2.47 1
 -5 6 -4 120.23 3.11 2
 6 -6 4 0.52 0.66 1
 6 6 4 1.53 0.63 3
 6 6 4 1.93 0.42 1
 -6 -6 -4 0.6 0.57 2
 -6 6 -4 0.92 0.59 2
 6 -6 4 1.38 0.34 3
 7 -6 4 106.99 3.05 1
 7 6 4 106.17 2.82 3
 -7 -6 -4 105.53 3.08 2
 -7 6 -4 102.28 3.14 2
 -8 6 -4 22.95 1.65 2
 8 -6 4 26.12 1.71 1
 8 6 4 25.52 1.51 3
 -8 -6 -4 23.97 1.64 2
 9 6 4 32.69 1.74 3
 9 -6 4 29.29 1.86 1
 -9 6 -4 30.24 1.88 2
 -9 -6 -4 30.77 1.88 2
 10 6 4 20.36 1.47 3
 10 -6 4 19.21 1.63 1
 -10 -6 -4 19.04 1.64 2
 -10 6 -4 16.56 1.58 2
 11 -6 4 1.13 0.92 1
 -11 -6 -4 1.55 1.01 2
 11 6 4 0.54 0.86 3
 -11 6 -4 -0.13 0.81 2
 -12 -6 -4 8.66 1.48 2
 12 6 4 8.11 1.26 3
 -12 6 -4 7.18 1.43 2
 -13 -6 -4 2.16 1.03 2
 -13 6 -4 4.04 1.32 2
 -14 -7 4 12.32 1.81 2
 14 7 -4 9.59 1.64 3
 -13 7 4 0.87 0.99 2
 -13 -7 4 -0.19 0.93 2
 13 7 -4 1.59 1.07 3
 -12 7 4 30.4 2.02 2
 12 7 -4 27.55 2.09 3
 -12 -7 4 26.79 2.01 2
 12 -7 -4 27.4 1.74 1
 11 -7 -4 0.33 0.81 3
 -11 -7 4 -0.28 0.74 2
 -11 7 4 -0.98 0.67 2
 11 7 -4 -0.34 0.77 3
 11 -7 -4 -0.02 0.67 1
 -10 7 4 -0.75 0.58 2
 10 -7 -4 0.53 0.73 1
 -10 -7 4 0.43 0.73 2
 10 7 -4 1.01 0.76 3
 10 -7 -4 1.02 0.77 3
 -9 -7 4 146 4.01 2
 9 -7 -4 151.93 3.75 3
 -9 7 4 146.25 3.73 2
 9 -7 -4 144.24 3.8 1
 9 7 -4 144.6 3.9 3
 -8 7 4 24.01 1.38 2
 8 7 -4 21.41 1.43 3
 8 -7 -4 24.72 1.52 1
 -8 7 4 23.09 1.38 3
 -8 -7 4 23.66 1.52 2
 7 -7 -4 7.56 0.95 1
 -7 -7 4 5.78 0.85 2
 -7 7 4 6.62 0.82 3
 7 7 -4 5.15 0.8 3
 -7 7 4 7.25 0.8 2
 -6 7 4 64.57 1.89 2
 -6 -7 4 68.14 2.18 2
 6 -7 -4 64.11 2.13 1
 -6 7 4 65.18 2.02 3
 6 7 -4 67.34 2.17 3
 -5 -7 4 40.24 1.57 2
 5 -7 -4 40.37 1.6 1
 -5 7 4 42.48 1.36 2
 -5 7 4 43.21 1.54 3
 5 7 -4 42.54 1.56 3
 4 7 -4 31.6 1.27 3
 -4 7 4 35.32 1.32 3
 -4 7 4 32.06 1.08 2
 4 -7 -4 31.59 1.37 1
 -4 -7 4 33.52 0.75 1
 -3 7 4 345.31 5.95 3
 3 7 -4 353.33 5.91 3
 -3 7 4 353.81 5.6 2
 -3 -7 4 355.46 5.45 1
 3 -7 -4 352 6.15 1
 -3 -7 4 361.93 6.13 2
 2 7 -4 484.69 7.92 2
 2 7 -4 497.13 7.63 3
 -2 -7 4 483.57 7.45 1
 -2 7 4 494.52 7.79 3
 2 -7 -4 491.9 7.94 1
 -2 7 4 475.12 7.33 2
 -1 7 4 214.88 3.93 3
 -1 7 4 212.14 3.45 2
 1 -7 -4 215.01 3.97 1
 1 7 -4 214.46 3.66 3
 1 7 -4 212.27 4.02 2
 -1 -7 4 220.64 3.72 1
 0 7 -4 29.37 1.15 2
 0 -7 -4 28.64 1.05 1
 0 -7 -4 29.25 0.84 2
 0 7 -4 30.04 0.85 3
 0 7 4 28.62 1.1 3
 0 -7 4 31.53 1.05 1
 -1 7 -4 1.58 0.23 3
 -1 -7 -4 0.5 0.29 2
 -1 -7 -4 1.27 0.34 1
 -1 7 -4 1.44 0.41 2
 1 7 4 1.26 0.43 3
 1 -7 4 1.36 0.39 1
 -2 -7 -4 86.06 1.96 1
 -2 -7 -4 84.73 1.94 2
 3 7 4 20.09 1.04 3
 -3 7 -4 20.66 1.1 2
 3 -7 4 20.89 1.11 1
 -3 -7 -4 20.38 0.86 1
 -3 -7 -4 24.03 1.04 2
 4 -7 4 11.1 0.91 1
 -4 7 -4 10.67 0.9 2
 4 7 4 10.69 0.87 3
 -4 -7 -4 9.93 0.82 2
 -4 -7 -4 11.01 0.68 1
 -5 7 -4 38.13 0.77 3
 -5 -7 -4 35.98 1.51 2
 5 7 4 38.7 1.56 3
 -5 -7 -4 34.64 1.12 1
 5 -7 4 35.44 1.59 1
 -5 7 -4 35.38 1.6 2
 -6 7 -4 40.46 1.85 2
 6 7 4 42.03 1.68 3
 6 -7 4 42.85 1.86 1
 -6 -7 -4 43.84 1.82 2
 6 7 4 41.23 1.22 1
 7 -7 4 28.54 1.74 1
 7 7 4 28.87 1.54 3
 -7 7 -4 27.81 1.68 2
 -7 -7 -4 27.91 1.58 2
 8 7 4 91.46 2.76 3
 -8 7 -4 87.45 3.06 2
 -8 -7 -4 92.24 3.03 2
 8 -7 4 88.53 2.94 1
 9 -7 4 8.95 1.26 1
 -9 7 -4 7.72 1.15 2
 -9 -7 -4 9.24 1.21 2
 9 7 4 6.6 0.96 3
 -10 -7 -4 -0.06 0.72 2
 -10 7 -4 -0.95 0.68 2
 10 -7 4 0.02 0.83 1
 10 7 4 -0.06 0.68 3
 11 -7 4 25.75 2.01 1
 -11 -7 -4 20.52 1.83 2
 -11 7 -4 25.21 2.04 2
 11 7 4 24.64 1.81 3
 -12 7 -4 2.75 1.18 2
 12 7 4 2.67 1.04 3
 12 -7 4 2.1 1.13 1
 -12 -7 -4 2.6 1.12 2
 -13 -7 -4 2.68 1.18 2
 -13 7 -4 2.97 1.27 2
 13 7 4 3.77 1.17 3
 14 8 -4 1.74 1.24 3
 -14 -8 4 -1.21 0.89 2
 -13 -8 4 31.71 2.3 2
 -13 8 4 25.78 2.04 2
 13 8 -4 32.94 2.37 3
 -12 8 4 0.09 0.73 2
 -12 -8 4 0.66 0.94 2
 12 -8 -4 0.43 0.77 1
 12 8 -4 -0.92 0.88 3
 11 -8 -4 58.79 2.51 1
 -11 8 4 61 2.54 2
 11 8 -4 60.18 2.68 3
 -11 -8 4 56.83 2.7 2
 10 -8 -4 0.6 0.75 1
 -10 8 4 0.21 0.67 2
 -10 8 4 0.68 0.7 3
 10 8 -4 0.68 0.73 3
 -10 -8 4 -0.69 0.66 2
 -9 8 4 0.22 0.59 2
 -9 -8 4 -0.54 0.65 2
 -9 8 4 0 0.66 3
 9 8 -4 0.29 0.67 3
 9 -8 -4 -0.77 0.64 1
 -8 8 4 18.92 1.29 3
 8 -8 -4 20.97 1.41 1
 -8 -8 4 20.95 1.44 2
 8 8 -4 20.13 1.4 3
 -8 8 4 19.77 1.28 2
 -7 -8 4 28.94 1.55 2
 7 8 -4 25.45 1.47 3
 7 -8 -4 28.75 1.62 1
 -7 8 4 25.09 1.38 3
 -7 8 4 25.78 1.31 2
 6 8 -4 226.06 4.66 3
 6 -8 -4 228.49 4.8 1
 -6 8 4 224.13 4.52 3
 -6 -8 4 227.98 4.79 2
 -6 8 4 229.03 4.41 2
 -5 8 4 1.75 0.53 3
 -5 -8 4 0.37 0.53 2
 5 -8 -4 1.12 0.54 1
 5 8 -4 0.72 0.47 3
 -5 8 4 1.17 0.4 2
 -4 8 4 88.49 2.3 3
 4 8 -4 94.39 2.38 3
 -4 8 4 90.79 2.06 2
 -4 -8 4 93.79 2.46 2
 -4 -8 4 92.66 1.65 1
 4 -8 -4 92.57 2.47 1
 -3 -8 4 0.29 0.4 2
 -3 -8 4 0.77 0.28 1
 3 8 -4 0.59 0.37 3
 -3 8 4 0.27 0.36 3
 3 -8 -4 0.61 0.43 1
 -3 8 4 0.18 0.27 2
 -2 8 4 77.86 1.99 3
 -2 8 4 76.59 1.61 2
 -2 -8 4 77.73 1.66 1
 2 -8 -4 78.9 2.05 1
 2 8 -4 75.02 2.04 2
 2 8 -4 79.15 1.88 3
 1 8 -4 240.98 4.07 3
 -1 8 4 243.26 4.37 3
 1 -8 -4 241.58 4.39 1
 -1 -8 4 241.7 4.14 1
 -1 8 4 236.5 3.9 2
 1 8 -4 244 4.52 2
 0 8 -4 0.37 0.26 3
 0 -8 -4 0.09 0.31 1
 0 8 -4 -0.2 0.3 2
 0 8 4 0.23 0.39 3
 0 -8 4 0.29 0.35 1
 0 -8 -4 0.2 0.23 2
 1 -8 4 4.14 0.54 1
 -1 -8 -4 3.41 0.4 2
 -1 -8 -4 3.26 0.45 1
 1 8 4 3.49 0.53 3
 -1 8 -4 3.45 0.31 3
 -1 8 -4 3.69 0.54 2
 -2 -8 -4 93.69 2.11 2
 2 -8 4 92.97 2.32 1
 -2 -8 -4 92.05 2.1 1
 -2 8 -4 86.46 2.36 2
 -2 8 -4 93.58 1.53 3
 -3 8 -4 209.53 4.33 2
 -3 -8 -4 213.53 3.87 1
 3 -8 4 212.77 4.28 1
 3 8 4 213.7 4.13 3
 -3 -8 -4 216.48 4.05 2
 -4 -8 -4 5.29 0.51 1
 -4 -8 -4 4.83 0.64 2
 4 8 4 5.56 0.7 3
 -4 8 -4 5.27 0.71 2
 4 -8 4 4.9 0.74 1
 -5 8 -4 12.06 1.04 2
 -5 -8 -4 13.59 0.73 1
 5 8 4 15.39 1.14 3
 -5 -8 -4 13.74 1.06 2
 5 -8 4 13.57 1.11 1
 6 8 4 14.42 1.12 3
 6 8 4 14.77 0.74 1
 6 -8 4 12.13 1.23 1
 -6 -8 -4 13.75 1.12 2
 -6 8 -4 13.14 1.14 2
 -7 -8 -4 1.98 0.73 2
 7 -8 4 1.33 0.79 1
 -7 8 -4 1.59 0.69 2
 7 8 4 1.42 0.66 3
 8 -8 4 5.52 1.1 1
 -8 -8 -4 4.88 1 2
 -8 8 -4 6.15 1.06 2
 8 8 4 7.62 0.97 3
 9 8 4 80.42 2.74 3
 -9 8 -4 80.45 3.11 2
 9 -8 4 79.46 2.96 1
 -9 -8 -4 80.57 3.07 2
 -10 -8 -4 1.71 0.89 2
 10 -8 4 1.32 0.99 1
 10 8 4 0.21 0.8 3
 -10 8 -4 0.64 0.78 2
 -11 -8 -4 38.16 2.4 2
 11 8 4 34.37 2.08 3
 -11 8 -4 29.8 2.16 2
 11 -8 4 35.08 2.18 1
 -12 -8 -4 46.95 2.83 2
 -12 8 -4 46.47 2.76 2
 12 8 4 43.85 2.42 3
 12 -8 4 47.97 2.66 1
 -13 -8 -4 -0.51 1.01 2
 -13 8 -4 0.52 1.1 2
 13 8 4 0.46 1.01 3
 -14 -9 4 3.53 1.36 2
 14 9 -4 4.48 1.45 3
 13 9 -4 -0.17 1 3
 -13 -9 4 0.18 0.96 2
 -12 9 4 10.88 1.35 2
 12 9 -4 14.94 1.7 3
 -12 -9 4 13.2 1.63 2
 12 -9 -4 14.8 1.53 1
 11 9 -4 0.31 0.79 3
 11 -9 -4 0.37 0.76 1
 -11 -9 4 1.38 0.9 2
 -11 9 4 1.04 0.77 2
 10 -9 -4 18.79 1.56 1
 -10 9 4 18.53 1.46 2
 10 9 -4 19.42 1.61 3
 -10 9 4 22.15 1.57 3
 -10 -9 4 18.32 1.58 2
 -9 9 4 2.67 0.77 2
 9 -9 -4 4.64 0.93 1
 -9 9 4 4.92 0.87 3
 -9 -9 4 2.2 0.83 2
 9 9 -4 4.83 0.96 3
 -8 -9 4 1.77 0.76 2
 8 -9 -4 2.06 0.82 1
 8 9 -4 3.13 0.81 3
 -8 9 4 2.97 0.71 2
 -8 9 4 2.77 0.75 3
 7 -9 -4 144.37 3.8 1
 -7 9 4 154.25 3.58 3
 -7 -9 4 156.27 3.9 2
 7 9 -4 155.38 3.8 3
 -7 9 4 158.47 3.57 2
 -6 9 4 413.49 6.98 2
 6 -9 -4 403.63 7.45 1
 6 9 -4 400.91 7.25 3
 -6 -9 4 390.59 7.34 2
 -6 9 4 391.17 6.99 3
 -5 9 4 1.75 0.48 2
 5 -9 -4 0.68 0.59 1
 -5 9 4 2.06 0.56 3
 -5 -9 4 2.33 0.65 2
 5 9 -4 1.41 0.56 3
 -4 9 4 252.74 4.44 2
 -4 -9 4 254.35 3.97 1
 4 9 -4 249.66 4.74 3
 4 -9 -4 253.92 5 1
 -4 9 4 246.15 4.69 3
 -4 -9 4 247.86 4.92 2
 -3 9 4 359.14 5.82 2
 -3 9 4 358.76 6.16 3
 -3 -9 4 362.67 6.43 2
 -3 -9 4 360.77 5.65 1
 3 9 -4 366.27 6.41 2
 3 9 -4 350.09 6.1 3
 3 -9 -4 357.84 6.41 1
 -2 9 4 24.52 0.86 2
 2 -9 -4 27.76 1.22 1
 -2 -9 4 29.3 0.99 1
 -2 9 4 27.52 1.19 3
 2 9 -4 26.74 1.08 3
 2 9 -4 27.47 1.23 2
 -1 9 4 1984.2 29.16 2
 -1 9 4 2003.07 29.31 3
 1 -9 -4 2078.34 29.9 1
 1 9 -4 2053.23 29.85 2
 -1 -9 4 2070.58 29.63 1
 1 9 -4 2060.62 29.04 3
 0 9 4 438.5 7.24 3
 0 -9 -4 444.55 7.26 1
 0 -9 4 452.71 7.24 1
 0 9 -4 450.6 6.79 3
 0 -9 -4 424.48 6.85 2
 0 9 -4 434.13 7.47 2
 1 -9 4 14.66 0.92 1
 1 9 4 14.33 0.95 3
 -1 9 -4 14.21 0.96 2
 -1 -9 -4 13.74 0.72 2
 -1 9 -4 14.23 0.6 3
 -1 -9 -4 13.71 0.76 1
 2 9 4 32.51 1.36 3
 2 -9 4 32.15 1.34 1
 -2 9 -4 30.33 1.34 2
 -2 9 -4 33.31 0.76 3
 -2 -9 -4 31.98 1.15 1
 -2 -9 -4 32.33 1.18 2
 -3 -9 -4 73.62 1.83 1
 -3 9 -4 72.55 2.23 2
 3 -9 4 73.81 2.2 1
 -3 -9 -4 73.12 1.99 2
 3 9 4 72.05 2.08 3
 4 -9 4 13.1 1.06 1
 4 9 4 13.5 1.02 3
 -4 9 -4 12.24 1.01 2
 -4 -9 -4 12.88 0.93 2
 -4 -9 -4 13.55 0.77 1
 5 9 4 18.22 1.21 3
 -5 -9 -4 16.32 1.17 2
 -5 -9 -4 18.31 0.84 1
 -5 9 -4 18.38 1.3 2
 5 -9 4 16.83 1.29 1
 6 9 4 4.73 0.8 3
 -6 9 -4 5.02 0.87 2
 -6 -9 -4 5.13 0.82 2
 6 -9 4 5.97 0.96 1
 -7 -9 -4 0.6 0.64 2
 7 9 4 0.51 0.7 3
 -7 9 -4 0.11 0.59 2
 7 -9 4 -0.05 0.77 1
 8 -9 4 2.58 0.93 1
 8 9 4 1.87 0.78 3
 -8 -9 -4 2.84 0.88 2
 -8 9 -4 3.04 0.87 2
 9 9 4 -0.64 0.71 3
 9 -9 4 -0.42 0.78 1
 -9 9 -4 0.01 0.68 2
 -9 -9 -4 -0.02 0.66 2
 -10 -9 -4 34.93 2.15 2
 10 -9 4 35.04 2.23 1
 10 9 4 37.36 2 3
 -10 9 -4 35.06 2.23 2
 -11 -9 -4 7.02 1.39 2
 -11 9 -4 8.26 1.4 2
 11 9 4 6.66 1.22 3
 11 -9 4 8.16 1.44 1
 12 9 4 16.55 1.64 3
 12 -9 4 19.66 1.85 1
 -12 9 -4 16.56 1.92 2
 -12 -9 -4 15.77 1.79 2
 13 9 4 37.05 2.4 3
 -13 -9 -4 35.05 2.54 2
 -13 9 -4 37.08 2.66 2
 -13 -10 4 0.75 0.98 2
 13 10 -4 0.73 1.07 3
 -12 -10 4 15.59 1.75 2
 12 10 -4 20.09 1.87 3
 12 -10 -4 23.89 1.87 1
 -11 -10 4 1.11 0.93 2
 11 10 -4 1.73 0.91 3
 -11 10 4 -0.23 0.75 2
 11 -10 -4 2.36 0.86 1
 -10 -10 4 -1.1 0.67 2
 -10 10 4 -0.16 0.59 2
 10 -10 -4 -0.07 0.75 1
 10 10 -4 -0.1 0.72 3
 -9 10 4 0.36 0.69 3
 -9 -10 4 -0.51 0.65 2
 -9 10 4 -0.07 0.6 2
 9 -10 -4 0.41 0.7 1
 9 10 -4 -0.26 0.65 3
 8 -10 -4 8.23 1.13 1
 -8 10 4 8.88 0.97 3
 8 10 -4 9.32 1.14 3
 -8 10 4 9.83 0.99 2
 -8 -10 4 8.32 1.07 2
 7 10 -4 69.4 2.41 3
 -7 -10 4 68.01 2.47 2
 7 -10 -4 66.05 2.46 1
 -7 10 4 69.96 2.2 2
 -7 10 4 68.05 2.22 3
 -6 10 4 28.21 1.31 2
 -6 -10 4 26.29 1.5 2
 6 -10 -4 26.12 1.54 1
 -6 10 4 26.75 1.37 3
 6 10 -4 29.17 1.52 3
 5 -10 -4 246.19 5.09 1
 -5 -10 4 239.83 4.99 2
 5 10 -4 239.99 4.83 3
 -5 10 4 241.46 4.7 3
 -5 10 4 241.43 4.55 2
 4 10 -4 155.03 3.44 3
 -4 10 4 153.4 3.38 3
 4 -10 -4 154.36 3.64 1
 -4 -10 4 162.12 3.65 2
 -4 -10 4 157.35 2.69 1
 -4 10 4 160.06 3.18 2
 -3 -10 4 75.65 1.68 1
 3 10 -4 72.74 2.19 2
 -3 10 4 74.78 1.8 2
 3 10 -4 74.03 2.02 3
 -3 10 4 74.33 2.08 3
 3 -10 -4 74.79 2.22 1
 2 10 -4 318.32 5.38 3
 2 10 -4 304.19 5.72 2
 -2 10 4 307.58 5.48 3
 2 -10 -4 319.78 5.72 1
 -2 -10 4 314.47 5.19 1
 -2 10 4 304.48 5.11 2
 1 10 -4 744.63 11.26 3
 -1 10 4 741.8 11.2 2
 1 10 -4 748.71 11.9 2
 1 -10 -4 742.72 11.76 1
 -1 -10 4 746.38 11.5 1
 -1 10 4 765.15 11.62 3
 0 10 -4 120.26 2.89 2
 0 -10 4 125.45 2.7 1
 0 -10 -4 114.04 2.62 1
 0 10 -4 121 2.35 3
 0 -10 -4 113.04 2.36 2
 1 10 4 209.13 4.1 3
 -1 -10 -4 205.19 3.94 1
 -1 -10 -4 210.1 3.8 2
 -1 10 -4 206.62 4.27 2
 1 -10 4 206.33 4.08 1
 -1 10 -4 210.95 3.48 3
 -2 -10 -4 0.96 0.4 2
 -2 10 -4 0.87 0.25 3
 2 -10 4 0.66 0.53 1
 -2 -10 -4 0.78 0.37 1
 2 10 4 0.5 0.5 3
 -2 10 -4 0.34 0.47 2
 -3 -10 -4 350.86 5.92 1
 -3 -10 -4 339.6 6.09 2
 -3 10 -4 348.12 6.5 2
 -3 10 -4 352.18 5.18 3
 3 -10 4 348.33 6.41 1
 3 10 4 350.78 6.25 3
 4 -10 4 -0.28 0.62 1
 -4 -10 -4 -0.51 0.4 2
 -4 10 -4 0.49 0.55 2
 -4 -10 -4 0.26 0.36 1
 4 10 4 1.25 0.56 3
 -5 -10 -4 167.1 3.84 2
 -5 10 -4 168.38 4.07 2
 5 10 4 168.95 3.86 3
 -5 -10 -4 166.94 3.19 1
 5 -10 4 167.36 4.11 1
 6 -10 4 68.01 2.56 1
 6 10 4 68.21 2.35 3
 -6 10 -4 65.55 2.45 2
 -6 -10 -4 66.5 2.34 2
 -7 10 -4 23.04 1.62 2
 -7 -10 -4 23.32 1.52 2
 7 -10 4 21.88 1.64 1
 7 10 4 23.12 1.55 3
 8 -10 4 31.73 2.02 1
 -8 -10 -4 31.94 1.9 2
 -8 10 -4 28.46 1.82 2
 8 10 4 32.19 1.82 3
 9 10 4 25.31 1.74 3
 9 -10 4 26.69 1.89 1
 -9 10 -4 25.54 1.82 2
 -9 -10 -4 24.41 1.81 2
 -10 10 -4 0.73 0.89 2
 10 -10 4 2.14 1.05 1
 10 10 4 1.12 0.85 3
 -10 -10 -4 2.04 0.92 2
 -11 10 -4 5.12 1.26 2
 11 -10 4 3.51 1.25 1
 -11 -10 -4 6.16 1.27 2
 11 10 4 6.18 1.22 3
 12 -10 4 0.5 1.11 1
 -12 -10 -4 -0.92 0.85 2
 -12 10 -4 0.01 0.9 2
 12 10 4 -1.95 0.81 3
 -13 10 -4 -0.83 0.96 2
 -13 -10 -4 1.87 1.13 2
 13 10 4 3 1.21 3
 13 -10 4 0.58 1.17 1
 -13 -11 4 0.26 0.99 2
 13 11 -4 0.77 1.07 3
 13 -11 -4 0.5 0.8 1
 12 -11 -4 -0.33 0.83 1
 12 11 -4 -0.37 0.89 3
 -12 -11 4 -0.24 0.88 2
 -11 -11 4 11.33 1.46 2
 11 11 -4 11.08 1.45 3
 11 -11 -4 13.12 1.4 1
 -10 11 4 2.35 0.82 2
 -10 -11 4 1.78 0.92 2
 10 -11 -4 2.03 0.94 1
 10 11 -4 1.66 0.91 3
 -9 11 4 36.85 1.8 3
 9 11 -4 38.28 2.03 3
 -9 11 4 39.02 1.87 2
 -9 -11 4 37.25 2.07 2
 9 -11 -4 42.79 2.14 1
 -8 11 4 8.03 0.96 2
 -8 11 4 6.75 0.94 3
 8 -11 -4 8.73 1.14 1
 -8 -11 4 6.51 1.04 2
 8 11 -4 6.78 1.01 3
 -7 11 4 7.47 0.9 3
 -7 -11 4 6.87 1 2
 -7 11 4 7.58 0.9 2
 7 11 -4 7.93 0.98 3
 7 -11 -4 7.41 1.03 1
 -6 11 4 317.03 5.81 2
 -6 -11 4 313.22 6.31 2
 6 11 -4 306.34 6.09 3
 6 -11 -4 309.16 6.33 1
 -6 11 4 315.28 5.88 3
 -5 11 4 111.85 2.68 2
 5 11 -4 110.36 2.94 3
 -5 -11 4 116.03 3.13 2
 5 -11 -4 111.57 3.16 1
 -5 11 4 113.01 2.83 3
 -4 11 4 391.67 6.77 3
 -4 11 4 389.34 6.53 2
 -4 -11 4 382.26 5.99 1
 4 11 -4 376.56 6.8 3
 4 -11 -4 397.54 7.2 1
 -4 -11 4 386.42 7.1 2
 -3 11 4 29.55 1.11 2
 3 11 -4 28.39 1.41 2
 -3 -11 4 31.42 1.07 1
 3 -11 -4 31.08 1.46 1
 -3 11 4 28.05 1.27 3
 3 11 -4 28.75 1.3 3
 -2 11 4 0.41 0.3 2
 2 -11 -4 0.1 0.45 1
 2 11 -4 0.76 0.47 2
 -2 -11 4 0.43 0.44 1
 2 11 -4 0.57 0.43 3
 -2 11 4 0.09 0.43 3
 -1 11 4 1010.97 14.85 2
 1 11 -4 1004.03 15.57 2
 1 11 -4 1005.23 14.84 3
 -1 11 4 1005.12 15.18 3
 1 -11 -4 973.26 15.4 1
 -1 -11 4 1008.03 15.2 1
 0 -11 -4 106.54 2.34 2
 0 -11 4 112.67 2.64 1
 0 11 4 114.87 2.71 3
 0 11 -4 115.12 2.89 2
 0 -11 -4 109.62 2.62 1
 0 11 -4 113.34 2.33 3
 -1 -11 -4 180.86 3.61 1
 -1 11 -4 171.03 3.89 2
 1 11 4 177.39 3.74 3
 1 -11 4 186.34 3.84 1
 -1 -11 -4 180.69 3.49 2
 -1 11 -4 184.16 3.16 3
 -2 -11 -4 554.12 9.03 2
 -2 11 -4 555.58 9.53 2
 2 -11 4 580.18 9.53 1
 2 11 4 559.35 9.25 3
 -2 11 -4 564.46 8.33 3
 -2 -11 -4 569.36 9.08 1
 -3 11 -4 8.12 0.92 2
 3 -11 4 7.79 0.93 1
 -3 -11 -4 9.16 0.8 2
 -3 11 -4 9.36 0.46 3
 3 11 4 9.82 0.96 3
 -3 -11 -4 9.08 0.74 1
 -4 -11 -4 335.49 6.26 2
 4 -11 4 343.75 6.65 1
 4 11 4 340.09 6.35 3
 -4 11 -4 344.89 6.64 2
 -4 -11 -4 344.87 5.83 1
 5 -11 4 64.87 2.43 1
 -5 11 -4 63.22 2.34 2
 5 11 4 65.36 2.3 3
 -5 -11 -4 64.37 2.23 2
 -6 11 -4 33.99 1.81 2
 -6 -11 -4 34.82 1.73 2
 6 11 4 33.27 1.7 3
 6 -11 4 36.35 2.02 1
 -7 11 -4 19.43 1.52 2
 7 11 4 19.31 1.43 3
 7 -11 4 23.34 1.77 1
 -7 -11 -4 21.15 1.49 2
 -8 -11 -4 13.34 1.34 2
 8 11 4 14.63 1.35 3
 8 -11 4 11.08 1.34 1
 -8 11 -4 11.52 1.31 2
 -9 11 -4 4.54 1.07 2
 9 11 4 4.02 1 3
 -9 -11 -4 4.77 1.15 2
 9 -11 4 3.66 1.07 1
 10 -11 4 1.72 1.1 1
 -10 11 -4 1.4 0.97 2
 -10 -11 -4 2.19 1 2
 10 11 4 2.8 1.04 3
 -11 11 -4 13.12 1.64 2
 -11 -11 -4 11.24 1.61 2
 11 -11 4 11.26 1.63 1
 11 11 4 12.45 1.52 3
 -12 11 -4 0 0.98 2
 12 -11 4 -0.35 0.94 1
 12 11 4 0.37 0.88 3
 -12 -11 -4 -1.46 0.88 2
 13 -12 -4 1.12 0.9 1
 -13 -12 4 1.08 1.05 2
 13 12 -4 -0.45 0.95 3
 12 12 -4 -1.38 0.82 3
 12 -12 -4 1.54 0.98 1
 -12 -12 4 -1.09 0.86 2
 -11 -12 4 8.87 1.43 2
 11 12 -4 9.96 1.46 3
 11 -12 -4 11.4 1.44 1
 10 12 -4 27.23 1.93 3
 -10 -12 4 26.97 1.93 2
 10 -12 -4 27.18 1.87 1
 9 12 -4 19.73 1.6 3
 -9 -12 4 17.76 1.59 2
 9 -12 -4 19.68 1.6 1
 -9 12 4 20.84 1.47 2
 -8 12 4 93.04 2.77 3
 8 -12 -4 94.36 3.18 1
 8 12 -4 94.3 3.15 3
 -8 12 4 96.07 2.87 2
 -7 12 4 47.69 1.88 2
 -7 -12 4 47.02 2.14 2
 7 12 -4 46.72 2.08 3
 7 -12 -4 46.4 2.15 1
 -7 12 4 49.39 1.9 3
 6 12 -4 25.57 1.51 3
 -6 12 4 26.64 1.42 3
 -6 -12 4 27.28 1.6 2
 6 -12 -4 27.44 1.64 1
 -6 12 4 24.92 1.35 2
 5 12 -4 131.94 3.28 3
 -5 -12 4 118.4 3.29 2
 -5 12 4 117.83 2.99 3
 -5 12 4 116.68 2.85 2
 5 -12 -4 119.45 3.34 1
 -4 -12 4 80.62 2.54 2
 -4 12 4 78.62 2.29 3
 -4 -12 4 81.58 1.7 1
 4 -12 -4 82.96 2.61 1
 -4 12 4 79.53 2.1 2
 4 12 -4 78.48 2.33 3
 -3 -12 4 166.02 3.13 1
 -3 12 4 164.53 3.28 2
 3 -12 -4 164.97 3.81 1
 -3 12 4 169.43 3.6 3
 3 12 -4 160.96 3.5 3
 3 12 -4 158.06 3.78 2
 -2 12 4 91.14 2.13 2
 -2 -12 4 89.34 2.18 1
 -2 12 4 90.97 2.4 3
 2 12 -4 93.95 2.62 2
 2 12 -4 90.8 2.3 3
 2 -12 -4 91.93 2.53 1
 -1 -12 4 19.14 1.08 1
 1 -12 -4 18.04 1.07 1
 1 12 -4 18.03 1.14 2
 1 12 -4 17.69 0.95 3
 -1 12 4 18.36 1.13 3
 -1 12 4 19.27 0.91 2
 0 -12 -4 144.48 3.19 1
 0 -12 4 145.13 3.25 1
 0 12 4 142.38 3.23 3
 0 12 -4 138.19 3.39 2
 0 -12 -4 142.22 2.91 2
 0 12 -4 143.28 2.83 3
 -1 12 -4 39.23 1.67 2
 1 12 4 40.08 1.58 3
 -1 12 -4 39.15 1.18 3
 1 -12 4 38.42 1.65 1
 -1 -12 -4 37.88 1.35 2
 -1 -12 -4 39.78 1.44 1
 -2 -12 -4 9.27 0.75 1
 -2 12 -4 8.68 0.59 3
 -2 -12 -4 9.47 0.79 2
 -2 12 -4 9.61 0.94 2
 2 -12 4 9.37 1.03 1
 2 12 4 10.28 0.98 3
 3 12 4 246.11 4.99 3
 3 -12 4 251.19 5.25 1
 -3 -12 -4 247.26 4.84 2
 -3 -12 -4 258.08 4.65 1
 -3 12 -4 241.98 5.18 2
 -4 12 -4 248.98 5.5 2
 4 -12 4 267.96 5.62 1
 -4 -12 -4 267.18 5.27 2
 4 12 4 266.51 5.36 3
 -4 -12 -4 270.97 4.79 1
 -5 -12 -4 2.5 0.7 2
 -5 12 -4 2.06 0.74 2
 5 12 4 3.34 0.82 3
 5 -12 4 2.34 0.93 1
 6 12 4 386.76 7.2 3
 6 -12 4 356.88 7.46 1
 -6 12 -4 361.41 7.41 2
 -6 -12 -4 380.31 7.24 2
 -7 12 -4 23.07 1.65 2
 7 12 4 24.13 1.6 3
 -7 -12 -4 26.93 1.68 2
 7 -12 4 27.72 1.95 1
 -8 12 -4 0.01 0.69 2
 -8 -12 -4 -0.14 0.77 2
 8 12 4 -0.89 0.64 3
 8 -12 4 0.66 0.95 1
 9 -12 4 96.25 3.58 1
 -9 12 -4 100.07 3.58 2
 -9 -12 -4 100.47 3.51 2
 9 12 4 99.98 3.37 3
 -10 -12 -4 0.04 0.86 2
 -10 12 -4 1.51 0.95 2
 10 12 4 -0.78 0.84 3
 10 -12 4 0.11 0.95 1
 11 12 4 3.28 1.06 3
 11 -12 4 4.86 1.37 1
 -11 12 -4 4.7 1.24 2
 -11 -12 -4 5.58 1.33 2
 12 -12 4 -1.35 1 1
 -12 -12 -4 -1.23 0.84 2
 12 12 4 -0.44 0.94 3
 -12 12 -4 0.79 1.08 2
 -13 -13 4 11.95 1.78 2
 13 13 -4 11.51 1.76 3
 13 -13 -4 16.29 1.77 1
 -12 -13 4 34.78 2.4 2
 12 -13 -4 31.13 2.27 1
 12 13 -4 31.01 2.36 3
 11 -13 -4 8.87 1.32 1
 11 13 -4 8.43 1.42 3
 -11 -13 4 7.9 1.39 2
 10 13 -4 5.17 1.12 3
 -10 -13 4 3.6 1.08 2
 10 -13 -4 5.41 1.13 1
 9 13 -4 35.82 2.09 3
 9 -13 -4 31.26 1.97 1
 -9 -13 4 33.95 2.05 2
 -8 13 4 -0.24 0.69 2
 -8 -13 4 -0.9 0.69 2
 8 -13 -4 0.03 0.74 1
 8 13 -4 0.95 0.77 3
 7 -13 -4 26.24 1.72 1
 -7 -13 4 25.7 1.67 2
 7 13 -4 25.37 1.7 3
 -7 13 4 25.72 1.46 3
 -7 13 4 23.61 1.4 2
 6 13 -4 -0.43 0.6 3
 -6 13 4 0.9 0.61 2
 -6 -13 4 0.27 0.7 2
 -6 13 4 1.5 0.66 3
 6 -13 -4 0.04 0.73 1
 5 13 -4 276.43 5.73 3
 5 -13 -4 285.93 6.06 1
 -5 13 4 300.88 5.62 3
 -5 -13 4 290.6 6.04 2
 -5 13 4 307.73 5.55 2
 4 -13 -4 138.36 3.57 1
 -4 13 4 136.14 3.06 2
 -4 13 4 139.1 3.26 3
 4 13 -4 135.17 3.32 3
 -4 -13 4 134.18 3.54 2
 -3 -13 4 50.26 1.49 1
 3 -13 -4 47.9 1.93 1
 -3 13 4 48.7 1.77 3
 -3 13 4 48.08 1.56 2
 3 13 -4 51.78 1.83 3
 3 13 -4 49.75 1.96 2
 2 -13 -4 -0.29 0.46 1
 -2 13 4 0.1 0.37 2
 2 13 -4 -0.59 0.43 2
 -2 -13 4 0.09 0.52 1
 -2 13 4 -0.34 0.5 3
 2 13 -4 -0.13 0.44 3
 -1 13 4 2.08 0.6 3
 1 -13 -4 2.06 0.62 1
 1 13 -4 3.55 0.58 3
 -1 -13 4 3.83 0.7 1
 -1 13 4 3.51 0.53 2
 1 13 -4 2.13 0.62 2
 0 13 -4 144.25 2.91 3
 0 -13 -4 142.58 3.24 1
 0 -13 -4 143.22 3 2
 0 13 4 136.64 3.27 3
 0 13 -4 142.9 3.5 2
 0 -13 4 145.85 3.34 1
 -1 -13 -4 29.63 1.29 1
 -1 13 -4 29.09 1.51 2
 1 13 4 30.94 1.49 3
 1 -13 4 28.23 1.46 1
 -1 13 -4 29.37 1.06 3
 -1 -13 -4 29.09 1.23 2
 -2 13 -4 33.22 1.67 2
 2 13 4 36.88 1.66 3
 -2 -13 -4 35.04 1.43 2
 2 -13 4 34.64 1.68 1
 -2 -13 -4 35.56 1.38 1
 -2 13 -4 34.83 1.07 3
 -3 -13 -4 15.82 0.94 1
 -3 13 -4 12.05 1.1 2
 -3 -13 -4 14.4 1.07 2
 3 13 4 12.91 1.15 3
 3 -13 4 14.04 1.23 1
 -4 -13 -4 10.42 0.99 2
 -4 13 -4 11.32 1.12 2
 4 -13 4 10.62 1.2 1
 -4 -13 -4 10.61 0.82 1
 4 13 4 11.23 1.08 3
 5 13 4 152.03 3.88 3
 -5 -13 -4 153.21 3.8 2
 -5 13 -4 152.99 4.03 2
 5 -13 4 154.82 4.14 1
 6 13 4 -0.15 0.73 3
 -6 -13 -4 -1.17 0.6 2
 6 -13 4 -0.41 0.82 1
 -6 13 -4 -0.46 0.64 2
 7 13 4 258.35 5.7 3
 -7 13 -4 261.03 6.02 2
 7 -13 4 248.91 5.99 1
 -7 -13 -4 257.01 5.77 2
 8 13 4 79.23 2.89 3
 8 -13 4 80.06 3.18 1
 -8 13 -4 83.96 3.18 2
 -8 -13 -4 80.03 2.99 2
 -9 13 -4 14.9 1.63 2
 -9 -13 -4 13.5 1.5 2
 9 -13 4 12.62 1.54 1
 9 13 4 12.9 1.36 3
 -10 -13 -4 83.85 3.4 2
 -10 13 -4 88.45 3.52 2
 10 -13 4 88.44 3.52 1
 10 13 4 80.83 3.16 3
 -11 -13 -4 4.78 1.26 2
 -11 13 -4 4.84 1.35 2
 11 -13 4 1.9 1.17 1
 11 13 4 2.66 1.14 3
 12 13 4 12.98 1.7 3
 -12 13 -4 12.07 1.77 2
 12 -13 4 14.59 1.89 1
 -12 -13 -4 13.44 1.87 2
 12 14 -4 18.22 1.94 3
 -12 -14 4 18.34 1.93 2
 12 -14 -4 21.87 1.95 1
 -11 -14 4 6.91 1.37 2
 11 -14 -4 7.28 1.33 1
 11 14 -4 6.76 1.35 3
 10 14 -4 3.71 1.03 3
 10 -14 -4 4.18 1.06 1
 -10 -14 4 4.74 1.16 2
 -9 -14 4 1.47 0.91 2
 9 -14 -4 1 0.85 1
 9 14 -4 0.35 0.73 3
 8 14 -4 9.08 1.21 3
 -8 -14 4 9.3 1.24 2
 8 -14 -4 8.14 1.21 1
 7 14 -4 31.78 1.81 3
 -7 -14 4 31.33 1.88 2
 -7 14 4 34.86 1.68 2
 7 -14 -4 32.21 1.98 1
 -7 14 4 32.39 1.63 3
 6 14 -4 1.04 0.74 3
 -6 14 4 1.1 0.64 2
 6 -14 -4 0.61 0.71 1
 -6 -14 4 1.81 0.84 2
 -6 14 4 1.61 0.71 3
 -5 14 4 58.2 1.94 2
 5 -14 -4 54.06 2.29 1
 -5 14 4 54.77 1.99 3
 -5 -14 4 57.07 2.29 2
 5 14 -4 57.25 2.19 3
 4 14 -4 6.57 0.9 3
 4 -14 -4 6.93 0.98 1
 -4 -14 4 7.59 1.02 2
 -4 14 4 6.87 0.77 2
 -4 14 4 6.17 0.85 3
 -3 -14 4 19.73 1.35 2
 3 14 -4 19.46 1.32 2
 -3 14 4 17.21 1.01 2
 3 14 -4 18.91 1.23 3
 -3 -14 4 18.96 1 1
 -3 14 4 18.4 1.21 3
 3 -14 -4 17.03 1.28 1
 -2 14 4 1.05 0.57 3
 2 14 -4 1.1 0.55 3
 2 -14 -4 0.63 0.58 1
 -2 14 4 1.38 0.48 2
 -2 -14 4 1.45 0.6 1
 2 14 -4 1.29 0.61 2
 -1 14 4 104.66 2.45 2
 1 14 -4 98.41 2.86 2
 1 14 -4 101.16 2.47 3
 -1 14 4 101.19 2.69 3
 1 -14 -4 98.87 2.7 1
 -1 -14 4 101.74 2.65 1
 0 14 4 11.74 1.05 3
 0 -14 -4 10.64 0.93 1
 0 -14 4 11.24 1.05 1
 0 14 -4 11.73 0.84 3
 0 -14 -4 12.6 0.85 2
 0 14 -4 11.01 1.01 2
 -1 -14 -4 129.82 3.01 1
 1 14 4 124.86 3.2 3
 1 -14 4 128.49 3.28 1
 -1 -14 -4 126.2 2.92 2
 -1 14 -4 124.5 3.35 2
 -1 14 -4 128.56 2.64 3
 2 14 4 48.36 1.98 3
 2 -14 4 51.57 2.08 1
 -2 14 -4 53.17 2.11 2
 -2 -14 -4 51.09 1.7 1
 -2 -14 -4 49.16 1.75 2
 -3 -14 -4 9.16 0.89 2
 3 -14 4 6.39 1.02 1
 -3 14 -4 8.43 1.01 2
 -3 -14 -4 8.37 0.78 1
 3 14 4 8.96 1.05 3
 4 14 4 55.77 2.19 3
 -4 14 -4 57.75 2.35 2
 4 -14 4 58.17 2.46 1
 -4 -14 -4 56.08 2.1 2
 5 -14 4 95.06 3.23 1
 -5 14 -4 95.67 3.13 2
 5 14 4 99.16 3.02 3
 -5 -14 -4 100.57 2.97 2
 6 -14 4 119.87 3.79 1
 6 14 4 113.05 3.39 3
 -6 -14 -4 121.48 3.46 2
 -6 14 -4 116.65 3.61 2
 -7 -14 -4 56.24 2.45 2
 7 -14 4 58.77 2.7 1
 -7 14 -4 63.58 2.7 2
 7 14 4 63.99 2.61 3
 -8 14 -4 34.01 2.15 2
 8 14 4 33.45 2.02 3
 -8 -14 -4 32.62 2.04 2
 8 -14 4 31.39 2.15 1
 9 14 4 33.23 2.14 3
 -9 14 -4 33.83 2.18 2
 9 -14 4 34.24 2.35 1
 -9 -14 -4 35.6 2.23 2
 -10 -14 -4 1.96 1.05 2
 10 14 4 3.15 1.11 3
 10 -14 4 3.05 1.26 1
 -10 14 -4 2.41 1.08 2
 -11 14 -4 30.55 2.37 2
 11 14 4 30.02 2.23 3
 11 -14 4 31.38 2.4 1
 -11 -14 -4 29.39 2.24 2
 -12 -14 -4 24.72 2.31 2
 -12 14 -4 20.42 2.12 2
 12 -14 4 22.68 2.24 1
 12 14 4 28.81 2.3 3
 -12 -15 4 1.47 1.09 2
 12 -15 -4 2.15 1.09 1
 12 15 -4 1.45 1.15 3
 -11 -15 4 4.29 1.3 2
 11 15 -4 4.37 1.26 3
 11 -15 -4 3.4 1.2 1
 -10 -15 4 5.89 1.25 2
 10 -15 -4 7.91 1.33 1
 10 15 -4 5.71 1.17 3
 9 -15 -4 0 0.76 1
 9 15 -4 0.08 0.82 3
 -9 -15 4 0.81 0.84 2
 8 -15 -4 48.28 2.43 1
 8 15 -4 47.52 2.3 3
 -8 -15 4 50.21 2.44 2
 7 15 -4 1.96 0.87 3
 7 -15 -4 2.37 0.9 1
 -7 -15 4 1.93 0.88 2
 -6 -15 4 14.03 1.35 2
 -6 15 4 12.18 1.1 3
 6 -15 -4 15.29 1.41 1
 6 15 -4 12.16 1.28 3
 -6 15 4 13.64 1.12 2
 5 15 -4 79.51 2.61 3
 -5 15 4 78.83 2.37 2
 -5 15 4 82.6 2.52 3
 5 -15 -4 76.65 2.78 1
 -5 -15 4 75.87 2.75 2
 -4 15 4 31.64 1.57 3
 -4 -15 4 30.99 1.8 2
 -4 15 4 34.21 1.49 2
 4 -15 -4 32.24 1.76 1
 4 15 -4 33.37 1.67 3
 3 -15 -4 43.43 1.95 1
 -3 15 4 47.06 1.66 2
 3 15 -4 44.32 1.82 3
 3 15 -4 44.8 1.99 2
 -3 15 4 46.65 1.84 3
 -3 -15 4 47.52 2.05 2
 -3 -15 4 44.31 1.52 1
 -2 15 4 45.37 1.58 2
 2 15 -4 46.76 1.75 3
 -2 -15 4 45.57 1.63 1
 2 15 -4 48.73 2.02 2
 2 -15 -4 49.84 2 1
 -2 15 4 47.2 1.87 3
 -1 15 4 6.84 0.86 3
 1 -15 -4 7.54 0.86 1
 1 15 -4 8.28 0.8 3
 -1 -15 4 8.49 0.94 1
 1 15 -4 7.9 0.98 2
 -1 15 4 6.43 0.71 2
 0 15 -4 -1 0.37 3
 0 15 4 -0.05 0.59 3
 0 15 -4 0.37 0.57 2
 0 -15 -4 0.76 0.47 2
 0 -15 -4 -0.69 0.48 1
 0 -15 4 -0.49 0.65 1
 -1 15 -4 0.46 0.45 3
 -1 -15 -4 0.72 0.49 1
 1 -15 4 -0.03 0.72 1
 -1 -15 -4 -0.73 0.41 2
 -1 15 -4 0.3 0.56 2
 1 15 4 0.43 0.61 3
 -2 15 -4 3.26 0.79 2
 2 -15 4 4.31 0.91 1
 2 15 4 3.95 0.88 3
 -2 -15 -4 5.14 0.69 1
 -2 -15 -4 4.38 0.72 2
 -3 -15 -4 3.84 0.75 2
 3 15 4 3.77 0.89 3
 -3 -15 -4 2.53 0.59 1
 3 -15 4 1.99 0.91 1
 -3 15 -4 2.53 0.81 2
 4 15 4 211.63 4.82 3
 -4 15 -4 212.01 5.03 2
 4 -15 4 211.43 5.11 1
 -4 -15 -4 218.17 4.73 2
 5 -15 4 12.04 1.36 1
 5 15 4 12.96 1.24 3
 -5 -15 -4 12.96 1.19 2
 -5 15 -4 17.16 1.48 2
 6 15 4 67.43 2.63 3
 -6 -15 -4 60.86 2.43 2
 6 -15 4 60.53 2.7 1
 -6 15 -4 63.32 2.68 2
 7 15 4 85.04 3.02 3
 -7 15 -4 85.91 3.23 2
 -7 -15 -4 90.6 3.16 2
 7 -15 4 80.4 3.25 1
 8 -15 4 5.48 1.28 1
 -8 15 -4 5.8 1.17 2
 8 15 4 6.53 1.17 3
 -8 -15 -4 6.31 1.17 2
 9 -15 4 0.59 1.08 1
 -9 -15 -4 -0.08 0.89 2
 -9 15 -4 1.22 0.9 2
 9 15 4 2.3 0.98 3
 10 -15 4 40.79 2.69 1
 -10 -15 -4 34.69 2.3 2
 -10 15 -4 36.9 2.38 2
 10 15 4 38.12 2.3 3
 -11 15 -4 0.56 1.03 2
 -11 -15 -4 -0.84 0.92 2
 11 -15 4 1.57 1.26 1
 11 15 4 0.39 1.09 3
 12 -16 -4 3.11 1.14 1
 12 16 -4 3.27 1.22 3
 -12 -16 4 1.36 1.13 2
 -11 -16 4 2.99 1.22 2
 11 -16 -4 4.9 1.24 1
 11 16 -4 4.2 1.22 3
 10 16 -4 2.49 1.07 3
 10 -16 -4 2.25 0.99 1
 -10 -16 4 3.01 1.07 2
 9 -16 -4 38.67 2.35 1
 9 16 -4 38.76 2.22 3
 -9 -16 4 38.76 2.31 2
 8 16 -4 8.08 1.24 3
 -8 -16 4 9.15 1.37 2
 8 -16 -4 7.6 1.21 1
 7 -16 -4 70.52 2.88 1
 7 16 -4 75.72 2.84 3
 -7 -16 4 68.61 2.82 2
 6 -16 -4 34.76 2 1
 -6 16 4 34.09 1.73 3
 6 16 -4 33.67 1.86 3
 -6 -16 4 33.84 1.97 2
 -5 16 4 30.31 1.65 3
 -5 16 4 33.69 1.62 2
 -5 -16 4 33.52 1.88 2
 5 -16 -4 32.62 1.88 1
 5 16 -4 31.92 1.78 3
 4 -16 -4 192.88 4.72 1
 -4 16 4 196.29 4.18 2
 -4 -16 4 193.85 4.78 2
 4 16 -4 197.12 4.46 3
 -4 16 4 201.45 4.36 3
 3 16 -4 24.55 1.59 2
 3 16 -4 25.02 1.48 3
 -3 16 4 26.53 1.5 3
 -3 -16 4 27.88 1.73 2
 3 -16 -4 26.12 1.58 1
 -3 16 4 27.13 1.32 2
 -2 16 4 460.6 8.15 3
 2 16 -4 467.87 8.03 3
 -2 -16 4 473.22 7.94 1
 2 16 -4 471.46 8.68 2
 2 -16 -4 455.9 8.42 1
 -2 16 4 459.88 7.88 2
 -1 -16 4 29.36 1.5 1
 1 16 -4 30.01 1.4 3
 -1 16 4 27.49 1.57 3
 1 -16 -4 28.18 1.49 1
 1 16 -4 31.93 1.7 2
 -1 16 4 29.54 1.38 2
 0 -16 -4 180.87 4.06 1
 0 -16 -4 180.69 3.82 2
 0 16 -4 175.09 4.33 2
 0 -16 4 179.57 4.14 1
 0 16 -4 178.23 3.66 3
 0 16 4 183.54 4.14 3
 -1 16 -4 2.88 0.56 3
 -1 -16 -4 1.15 0.57 2
 -1 16 -4 1.46 0.7 2
 1 -16 4 1.12 0.74 1
 -1 -16 -4 2.04 0.6 1
 1 16 4 2.16 0.75 3
 -2 -16 -4 20.93 1.28 2
 -2 16 -4 21.68 1.54 2
 2 -16 4 19.03 1.48 1
 2 16 4 20.83 1.49 3
 -2 -16 -4 21.55 1.2 1
 -3 16 -4 80.03 2.83 2
 -3 -16 -4 81 2.31 1
 -3 -16 -4 78.09 2.48 2
 3 16 4 72.49 2.62 3
 3 -16 4 78.04 2.87 1
 4 -16 4 11.76 1.32 1
 -4 -16 -4 10.88 1.11 2
 4 16 4 9.45 1.21 3
 -4 16 -4 11.55 1.31 2
 -5 16 -4 161.95 4.42 2
 5 16 4 154.91 4.15 3
 -5 -16 -4 163.44 4.12 2
 6 16 4 0.42 0.77 3
 -6 16 -4 -0.99 0.61 2
 6 -16 4 0.55 0.9 1
 -6 -16 -4 -0.14 0.68 2
 -7 -16 -4 52 2.44 2
 7 16 4 50.44 2.44 3
 -7 16 -4 50.97 2.5 2
 7 -16 4 51.31 2.62 1
 -8 -16 -4 13.28 1.52 2
 -8 16 -4 9.49 1.35 2
 8 16 4 8.97 1.3 3
 8 -16 4 9.4 1.43 1
 -9 16 -4 5.26 1.24 2
 9 -16 4 4.13 1.27 1
 9 16 4 5.61 1.2 3
 -9 -16 -4 6.09 1.26 2
 -10 16 -4 1.25 1.09 2
 -10 -16 -4 1.62 1.02 2
 10 -16 4 1.81 1.19 1
 10 16 4 4.03 1.23 3
 11 -16 4 10.2 1.69 1
 -11 16 -4 12.47 1.79 2
 -11 -16 -4 13.49 1.81 2
 11 16 4 11.34 1.59 3
 -11 -17 4 0.85 1.09 2
 11 -17 -4 0.72 1.07 1
 11 17 -4 0.44 0.96 3
 10 -17 -4 4.34 1.21 1
 10 17 -4 4.67 1.24 3
 -10 -17 4 6.48 1.35 2
 -9 -17 4 0.23 0.8 2
 9 -17 -4 0.96 0.91 1
 9 17 -4 0.91 0.86 3
 8 17 -4 14.27 1.48 3
 -8 -17 4 12.94 1.48 2
 8 -17 -4 12.86 1.47 1
 7 -17 -4 7.4 1.23 1
 -7 -17 4 8.11 1.24 2
 7 17 -4 5.62 1.09 3
 -6 -17 4 82.71 3.06 2
 6 -17 -4 79.25 3.01 1
 6 17 -4 80.74 2.91 3
 5 17 -4 148.99 3.95 3
 -5 -17 4 148.22 4.19 2
 5 -17 -4 152.1 4.24 1
 -5 17 4 152.28 3.73 3
 -4 -17 4 6.33 1.05 2
 -4 17 4 5.25 0.95 3
 -4 17 4 5.42 0.82 2
 4 -17 -4 5.34 0.98 1
 4 17 -4 6.3 0.94 3
 -3 -17 4 91.38 3.08 2
 -3 17 4 102.52 2.87 3
 3 -17 -4 91.39 2.97 1
 3 17 -4 93.5 2.79 3
 -3 17 4 96.94 2.63 2
 2 17 -4 218.94 5.12 2
 2 17 -4 217.01 4.58 3
 -2 17 4 214.21 4.44 2
 -2 -17 4 217.62 4.43 1
 -2 17 4 224.99 4.76 3
 2 -17 -4 216.08 4.91 1
 -1 -17 4 99.45 2.78 1
 1 17 -4 101.72 2.69 3
 -1 17 4 98.09 2.87 3
 -1 17 4 96.59 2.63 2
 1 -17 -4 96.98 2.88 1
 1 17 -4 95.42 3.07 2
 0 -17 -4 46.36 1.73 2
 0 17 -4 43.72 1.64 3
 0 17 -4 43.51 2.03 2
 0 17 4 44.58 1.98 3
 0 -17 -4 43.68 1.83 1
 0 -17 4 45.55 1.96 1
 -1 -17 -4 7.47 0.86 1
 -1 17 -4 6.72 1.01 2
 1 17 4 7.97 1 3
 -1 -17 -4 10.18 0.95 2
 1 -17 4 8.24 1.07 1
 -2 17 -4 6.57 1.07 2
 2 -17 4 8.28 1.11 1
 2 17 4 7.19 1.06 3
 -2 -17 -4 6.3 0.84 1
 -2 -17 -4 5.98 0.87 2
 3 17 4 8.68 1.1 3
 -3 17 -4 6.57 1.12 2
 -3 -17 -4 9.33 1.06 2
 3 -17 4 7.1 1.22 1
 4 17 4 14.73 1.35 3
 -4 17 -4 16.61 1.48 2
 4 -17 4 14.24 1.46 1
 -4 -17 -4 14.81 1.27 2
 5 -17 4 1.53 0.97 1
 -5 17 -4 1.36 0.87 2
 5 17 4 1.55 0.84 3
 -5 -17 -4 1.47 0.77 2
 6 -17 4 -0.22 0.86 1
 6 17 4 0.44 0.79 3
 -6 17 -4 0.39 0.75 2
 -6 -17 -4 1.69 0.82 2
 7 -17 4 12.52 1.52 1
 7 17 4 15.66 1.49 3
 -7 17 -4 15.72 1.56 2
 -7 -17 -4 18.04 1.59 2
 8 -17 4 -0.56 0.93 1
 -8 17 -4 -0.18 0.78 2
 8 17 4 1.17 0.84 3
 -8 -17 -4 -0.63 0.71 2
 9 -17 4 5.93 1.4 1
 9 17 4 6.45 1.27 3
 -9 17 -4 10.37 1.5 2
 -9 -17 -4 11.06 1.52 2
 10 -17 4 -0.9 0.96 1
 -10 -17 -4 -0.96 0.86 2
 10 17 4 0.33 0.9 3
 -10 17 -4 -0.88 0.97 2
 11 -17 4 16.95 1.98 1
 -11 17 -4 16.21 1.93 2
 -11 -17 -4 13.03 1.77 2
 11 17 4 14.5 1.82 3
 11 -18 -4 2.34 1.16 1
 11 18 -4 1.53 1.06 3
 -11 -18 4 1.28 1.08 2
 10 18 -4 1.1 1.01 3
 -10 -18 4 1.6 1.03 2
 10 -18 -4 0.98 1.01 1
 -9 -18 4 1.92 1.09 2
 9 -18 -4 4.94 1.25 1
 9 18 -4 3.28 1.07 3
 8 -18 -4 -0.62 0.75 1
 -8 -18 4 -0.31 0.77 2
 8 18 -4 -0.51 0.74 3
 7 -18 -4 12.11 1.42 1
 7 18 -4 11.19 1.3 3
 -7 -18 4 11.34 1.4 2
 6 -18 -4 5.35 1.05 1
 -6 -18 4 4.92 1.09 2
 6 18 -4 5.33 1.06 3
 5 -18 -4 52.45 2.43 1
 -5 18 4 54.43 2.14 3
 5 18 -4 53.76 2.32 3
 -5 -18 4 52.62 2.44 2
 -4 -18 4 16.58 1.45 2
 4 -18 -4 17.48 1.46 1
 4 18 -4 16.3 1.33 3
 -4 18 4 16.73 1.34 3
 3 -18 -4 3.12 0.87 1
 3 18 -4 4.69 0.87 3
 -3 -18 4 4.29 0.97 2
 -3 18 4 4.54 0.8 2
 -3 18 4 3.85 0.87 3
 2 18 -4 1.98 0.72 3
 -2 18 4 1.33 0.61 2
 2 18 -4 1.86 0.8 2
 -2 18 4 3.56 0.9 3
 2 -18 -4 2.44 0.76 1
 1 18 -4 6.33 1.01 2
 1 18 -4 8.45 0.91 3
 -1 -18 4 8.02 0.98 1
 -1 18 4 9.35 0.95 2
 1 -18 -4 8.98 1.02 1
 -1 18 4 7.74 0.99 3
 0 18 -4 0.47 0.53 3
 0 18 4 0.31 0.74 3
 0 -18 4 0.74 0.76 1
 0 -18 -4 1.61 0.65 1
 0 -18 -4 0.65 0.55 2
 0 18 -4 -0.78 0.59 2
 -1 -18 -4 15.81 1.16 1
 1 18 4 13.12 1.27 3
 1 -18 4 13.28 1.32 1
 -1 18 -4 12.13 1.27 2
 -1 -18 -4 14.26 1.14 2
 -2 -18 -4 1.11 0.62 1
 2 18 4 1.1 0.78 3
 2 -18 4 1.13 0.89 1
 -2 -18 -4 0.79 0.67 2
 -2 18 -4 1.62 0.82 2
 -3 18 -4 85.74 3.07 2
 3 18 4 88.35 2.99 3
 3 -18 4 81.96 3.01 1
 -3 -18 -4 84.91 2.7 2
 4 -18 4 7.01 1.27 1
 -4 18 -4 6.93 1.16 2
 4 18 4 4.58 1 3
 -4 -18 -4 5.92 1.04 2
 5 18 4 57.96 2.53 3
 -5 18 -4 62.09 2.69 2
 5 -18 4 63.79 2.82 1
 -5 -18 -4 65.21 2.56 2
 6 -18 4 6.56 1.22 1
 -6 18 -4 3.94 1.11 2
 6 18 4 4.91 1.07 3
 -6 -18 -4 5.8 1.04 2
 -7 -18 -4 5.48 1.16 2
 7 18 4 3.2 1.08 3
 -7 18 -4 3.03 1.08 2
 7 -18 4 5.37 1.27 1
 -8 -18 -4 8.96 1.34 2
 8 18 4 6.07 1.2 3
 8 -18 4 5.72 1.42 1
 -8 18 -4 8.83 1.38 2
 9 -18 4 -0.35 1.02 1
 9 18 4 0.09 0.89 3
 -9 -18 -4 -1.08 0.88 2
 -9 18 -4 -1.07 0.74 2
 10 18 4 -0.35 1.01 3
 -10 -18 -4 1.01 1.11 2
 10 -18 4 -0.31 1.21 1
 -10 18 -4 0.19 0.99 2
 -10 -19 4 0.03 0.92 2
 10 -19 -4 1 1.03 1
 10 19 -4 0.57 0.94 3
 -9 -19 4 7.79 1.43 2
 9 19 -4 7.71 1.32 3
 9 -19 -4 9.23 1.46 1
 8 -19 -4 1.96 0.96 1
 -8 -19 4 1.37 0.98 2
 8 19 -4 1.72 0.96 3
 -7 -19 4 14.39 1.56 2
 7 19 -4 17.11 1.55 3
 7 -19 -4 17.88 1.71 1
 6 19 -4 3.6 1.01 3
 6 -19 -4 3.01 1.02 1
 -6 -19 4 4.08 1.07 2
 -5 -19 4 21.17 1.68 2
 5 -19 -4 20.07 1.68 1
 5 19 -4 20.05 1.51 3
 4 -19 -4 8.8 1.22 1
 -4 19 4 8.06 1.06 3
 4 19 -4 8.76 1.1 3
 -4 -19 4 8.81 1.23 2
 3 19 -4 0.32 0.63 3
 3 -19 -4 -0.09 0.64 1
 -3 -19 4 1.39 0.78 2
 -3 19 4 0.64 0.75 3
 2 -19 -4 12.54 1.24 1
 2 19 -4 8.22 1.15 2
 2 19 -4 13.87 1.17 3
 -2 19 4 12.34 1.21 3
 1 -19 -4 0.95 0.68 1
 1 19 -4 -0.39 0.62 2
 -1 19 4 -0.15 0.59 2
 -1 -19 4 -0.17 0.65 1
 -1 19 4 -0.18 0.72 3
 1 19 -4 0.53 0.59 3
 0 -19 4 44.64 2.04 1
 0 19 -4 44.19 2.15 2
 0 -19 -4 41.35 1.78 2
 0 19 4 44.92 2.08 3
 0 -19 -4 45.24 1.95 1
 -1 19 -4 124.43 3.78 2
 -1 -19 -4 129.43 3.38 1
 1 19 4 124.48 3.57 3
 1 -19 4 124.94 3.6 1
 -1 -19 -4 128.94 3.36 2
 2 -19 4 12.66 1.39 1
 -2 -19 -4 11.75 1.1 2
 -2 19 -4 11.76 1.31 2
 2 19 4 11.46 1.22 3
 -3 -19 -4 114.11 3.35 2
 3 -19 4 127.22 3.85 1
 -3 19 -4 123.81 3.85 2
 3 19 4 119.97 3.59 3
 -4 -19 -4 119.72 3.46 2
 4 19 4 112.28 3.56 3
 4 -19 4 118.44 3.83 1
 -4 19 -4 116 3.76 2
 -5 19 -4 29.42 1.97 2
 5 -19 4 29.8 2.08 1
 5 19 4 30.26 1.92 3
 -5 -19 -4 31.28 1.88 2
 -6 -19 -4 42.25 2.25 2
 6 19 4 43.61 2.4 3
 6 -19 4 44.49 2.54 1
 -6 19 -4 49.97 2.53 2
 7 19 4 23.12 1.84 3
 7 -19 4 23.85 2.02 1
 -7 -19 -4 21.3 1.74 2
 -7 19 -4 25.19 2 2
 -8 19 -4 0.36 0.98 2
 8 19 4 0.25 0.92 3
 8 -19 4 -0.76 0.92 1
 -8 -19 -4 0.53 0.95 2
 -9 -19 -4 15.31 1.69 2
 -9 19 -4 15.74 1.87 2
 9 -19 4 14.51 1.82 1
 9 19 4 17.9 1.78 3
 -10 19 -4 1.54 1.17 2
 10 19 4 -0.35 1.07 3
 -10 -19 -4 -0.45 1.02 2
 10 -19 4 0.23 1.25 1
 -10 -20 4 0.61 1.09 2
 10 20 -4 0.94 1.02 3
 10 -20 -4 0.79 0.95 1
 9 -20 -4 0.25 0.94 1
 9 20 -4 0.99 0.91 3
 -9 -20 4 -0.73 0.81 2
 -8 -20 4 2 1.05 2
 8 20 -4 3.13 1.07 3
 8 -20 -4 2.51 1.09 1
 7 20 -4 -0.81 0.79 3
 -7 -20 4 1.94 0.97 2
 7 -20 -4 -0.22 0.8 1
 6 -20 -4 1.35 0.9 1
 -6 -20 4 1.64 1 2
 6 20 -4 1.84 0.95 3
 5 20 -4 22.47 1.68 3
 5 -20 -4 21.91 1.79 1
 -5 -20 4 21.44 1.76 2
 4 20 -4 1.87 0.8 3
 -4 20 4 0.48 0.79 3
 -4 -20 4 2.61 0.9 2
 4 -20 -4 1.88 0.88 1
 3 20 -4 13.52 1.26 3
 3 -20 -4 10.09 1.19 1
 -3 20 4 12.5 1.23 3
 -3 -20 4 13.19 1.37 2
 2 -20 -4 36.74 1.96 1
 2 20 -4 36.37 2.04 2
 -2 20 4 41.73 1.97 3
 2 20 -4 40.46 1.85 3
 -1 -20 4 0.34 0.68 1
 1 20 -4 -0.07 0.59 3
 1 -20 -4 -0.32 0.59 1
 1 20 -4 -0.36 0.68 2
 -1 20 4 1.28 0.81 3
 0 -20 4 74.52 2.65 1
 0 -20 -4 72.61 2.51 1
 0 20 -4 67.52 2.77 2
 0 20 4 74.09 2.7 3
 0 -20 -4 70.99 2.4 2
 -1 -20 -4 41 1.87 2
 1 20 4 42.3 2.14 3
 -1 -20 -4 44.68 1.93 1
 1 -20 4 44.09 2.12 1
 -1 20 -4 45.96 2.26 2
 -2 -20 -4 -0.47 0.6 2
 2 20 4 0.5 0.82 3
 -2 20 -4 -0.39 0.75 2
 2 -20 4 1.48 0.91 1
 3 20 4 6.86 1.19 3
 -3 20 -4 4.59 1.1 2
 3 -20 4 5.61 1.19 1
 -3 -20 -4 5.65 0.98 2
 -4 -20 -4 1.71 0.87 2
 -4 20 -4 3.48 1.08 2
 4 -20 4 3.06 1.07 1
 4 20 4 1.41 0.87 3
 -5 20 -4 5.42 1.21 2
 5 -20 4 2.44 1.06 1
 5 20 4 3.37 1.01 3
 -5 -20 -4 4.54 1.03 2
 6 20 4 10.03 1.44 3
 -6 -20 -4 11.16 1.38 2
 -6 20 -4 7.99 1.39 2
 6 -20 4 8.45 1.51 1
 7 20 4 3.53 1.16 3
 -7 -20 -4 6.85 1.22 2
 -7 20 -4 5.39 1.27 2
 7 -20 4 5.27 1.39 1
 -8 -20 -4 7.85 1.41 2
 -8 20 -4 6.82 1.42 2
 8 -20 4 5.56 1.42 1
 8 20 4 7.12 1.31 3
 -9 20 -4 0.85 1.03 2
 9 -20 4 1.01 1.25 1
 -9 -20 -4 1.73 1.13 2
 9 20 4 1.7 1.05 3
 -9 -21 4 1.52 1.11 2
 9 21 -4 0.09 0.94 3
 9 -21 -4 2.38 1.1 1
 -8 -21 4 6.02 1.4 2
 8 -21 -4 3.83 1.18 1
 8 21 -4 2.99 1.16 3
 7 -21 -4 19.01 1.8 1
 -7 -21 4 17.62 1.78 2
 7 21 -4 16.25 1.58 3
 6 -21 -4 0.56 0.84 1
 -6 -21 4 0.08 0.81 2
 6 21 -4 0.63 0.92 3
 5 21 -4 27.59 1.85 3
 5 -21 -4 27.36 1.99 1
 -5 -21 4 25.87 2 2
 4 21 -4 4.95 0.95 3
 -4 -21 4 3.19 1.02 2
 4 -21 -4 5.12 1.07 1
 -3 -21 4 0.85 0.87 2
 -3 21 4 1.6 0.92 3
 3 21 -4 3.76 0.9 3
 3 -21 -4 4 0.92 1
 2 -21 -4 0.99 0.74 1
 2 21 -4 -0.09 0.7 2
 -2 21 4 -0.41 0.76 3
 2 21 -4 -0.95 0.65 3
 1 -21 -4 2.43 0.76 1
 1 21 -4 1.07 0.86 2
 -1 21 4 1.88 0.86 3
 0 -21 4 -0.02 0.74 1
 0 21 -4 1.46 0.85 2
 0 -21 -4 0.34 0.59 1
 0 21 4 -0.43 0.77 3
 1 -21 4 6.06 1.09 1
 1 21 4 4.9 1.09 3
 -1 -21 -4 5.64 0.88 1
 -1 21 -4 5.98 1.14 2
 -2 21 -4 0.3 0.79 2
 2 21 4 2.29 0.91 3
 -2 -21 -4 1.89 0.8 2
 2 -21 4 0.92 0.89 1
 -3 -21 -4 6.68 1.07 2
 3 21 4 6.01 1.19 3
 -3 21 -4 9.07 1.34 2
 3 -21 4 5.6 1.18 1
 -4 -21 -4 -0.15 0.75 2
 4 -21 4 0.39 0.95 1
 4 21 4 2.25 0.97 3
 -4 21 -4 0.7 0.86 2
 -5 -21 -4 30.03 1.94 2
 5 21 4 30.07 2.07 3
 5 -21 4 29.71 2.26 1
 -5 21 -4 28.61 2.02 2
 6 21 4 7.58 1.31 3
 -6 -21 -4 9.65 1.32 2
 6 -21 4 6.9 1.39 1
 -6 21 -4 8.23 1.41 2
 -7 21 -4 29.93 2.3 2
 -7 -21 -4 26.61 1.96 2
 7 21 4 31.58 2.23 3
 7 -21 4 29.93 2.42 1
 8 -21 4 6.94 1.5 1
 8 21 4 5.91 1.36 3
 -8 -21 -4 5.03 1.29 2
 -8 21 -4 6.21 1.48 2
 -8 -22 4 17.38 1.88 2
 8 22 -4 16.74 1.73 3
 8 -22 -4 19.56 1.93 1
 -7 -22 4 1.01 1.03 2
 7 -22 -4 1.2 0.93 1
 7 22 -4 -0.42 0.91 3
 6 -22 -4 21.89 1.93 1
 6 22 -4 20.2 1.75 3
 -6 -22 4 20.62 1.92 2
 -5 -22 4 2.26 0.99 2
 5 -22 -4 0.08 0.8 1
 5 22 -4 1.21 0.84 3
 -4 -22 4 5.03 1.17 2
 4 -22 -4 6.7 1.2 1
 4 22 -4 7.89 1.17 3
 3 22 -4 9.5 1.19 3
 -3 -22 4 12.61 1.44 2
 3 -22 -4 10 1.24 1
 2 -22 -4 0.93 0.77 1
 2 22 -4 0.05 0.73 2
 -2 22 4 1.98 0.89 3
 -2 -22 4 1.36 0.83 2
 1 -22 -4 12.88 1.27 1
 -1 22 4 14.62 1.42 3
 1 22 -4 12.8 1.49 2
 0 -22 -4 0.6 0.65 1
 0 22 4 -0.13 0.84 3
 0 -22 4 -0.42 0.81 1
 0 22 -4 -0.16 0.78 2
 1 22 4 0.3 0.85 3
 -1 22 -4 -0.01 0.73 2
 1 -22 4 1.19 0.89 1
 -2 22 -4 0.37 0.83 2
 2 -22 4 -0.51 0.86 1
 2 22 4 -0.51 0.88 3
 -3 -22 -4 6.32 1.11 2
 3 22 4 8.54 1.33 3
 -3 22 -4 6.2 1.26 2
 3 -22 4 7.86 1.29 1
 -4 22 -4 23.76 1.96 2
 -4 -22 -4 19.86 1.65 2
 4 22 4 24.95 1.97 3
 4 -22 4 25.57 2.02 1
 5 -22 4 1.05 1.05 1
 -5 22 -4 2.26 1.06 2
 -5 -22 -4 0.66 0.87 2
 5 22 4 1.9 1.06 3
 6 -22 4 1.7 1.18 1
 -6 -22 -4 2.29 0.97 2
 6 22 4 1.34 1.05 3
 -6 22 -4 3.84 1.25 2
 -7 22 -4 9.64 1.6 2
 7 22 4 6.44 1.38 3
 7 -22 4 10.59 1.6 1
 -7 -22 -4 5.58 1.29 2
 8 -22 4 5.72 1.4 1
 8 22 4 7.34 1.48 3
 -8 -22 -4 7.26 1.44 2
 -8 22 -4 8.7 1.55 2
 8 -23 -4 9.1 1.51 1
 -8 -23 4 4.02 1.39 2
 8 23 -4 6.24 1.31 3
 7 -23 -4 9.83 1.56 1
 -7 -23 4 3.05 1.25 2
 7 23 -4 7.96 1.36 3
 -6 -23 4 11.86 1.62 2
 6 -23 -4 11.7 1.57 1
 6 23 -4 13.7 1.51 3
 -5 -23 4 11.13 1.55 2
 5 -23 -4 10.84 1.44 1
 5 23 -4 11.23 1.44 3
 4 23 -4 31.35 1.96 3
 -4 -23 4 28.58 2.16 2
 4 -23 -4 33.28 2.1 1
 3 -23 -4 49.02 2.47 1
 3 23 -4 51.23 2.32 3
 -3 -23 4 50.02 2.6 2
 -2 -23 4 2.62 1.03 2
 -2 23 4 0.17 0.9 3
 1 23 -4 38.43 2.26 2
 1 -23 -4 39.45 2.07 1
 -1 23 4 36.81 2.1 3
 0 -23 -4 60.9 2.47 1
 0 23 -4 56.86 2.77 2
 0 23 4 57.73 2.52 3
 -1 23 -4 1.46 0.98 2
 1 23 4 1.33 0.88 3
 1 -23 4 1 0.89 1
 2 23 4 42.18 2.25 3
 -2 23 -4 37.93 2.34 2
 2 -23 4 39.44 2.34 1
 3 -23 4 2.97 1.14 1
 -3 23 -4 5.11 1.24 2
 3 23 4 8.53 1.35 3
 4 23 4 25.81 1.95 3
 -4 23 -4 26.41 2.09 2
 4 -23 4 27.98 2.12 1
 -5 23 -4 6.65 1.45 2
 -5 -23 -4 9.49 1.3 2
 5 23 4 9.46 1.49 3
 5 -23 4 11.11 1.58 1
 -6 -23 -4 6.6 1.28 2
 -6 23 -4 8.2 1.52 2
 6 23 4 7.86 1.37 3
 6 -23 4 5.55 1.35 1
 -7 23 -4 2.65 1.19 2
 -7 -23 -4 2.17 1.14 2
 7 -23 4 -0.6 1.04 1
 7 23 4 1.67 1.11 3
 7 24 -4 17.98 1.85 3
 -7 -24 4 17.04 1.96 2
 7 -24 -4 15.32 1.77 1
 6 24 -4 4.99 1.23 3
 -6 -24 4 1.66 1.22 2
 6 -24 -4 2.11 1.05 1
 5 -24 -4 22.24 1.96 1
 5 24 -4 21.72 1.82 3
 -5 -24 4 22.58 2.04 2
 4 24 -4 65.99 2.79 3
 4 -24 -4 68 3.06 1
 -4 -24 4 62.66 3.03 2
 3 -24 -4 1.78 0.87 1
 -3 -24 4 0.52 0.84 2
 2 -24 -4 64.1 2.78 1
 -2 -24 4 64.35 2.96 2
 -1 24 4 3.41 1.09 3
 1 24 -4 4.68 1.18 2
 1 -24 -4 4.74 1.01 1
 0 24 4 57.39 2.65 3
 0 24 -4 58.57 2.88 2
 1 -24 4 1.69 0.98 1
 1 24 4 -0.42 0.86 3
 -1 24 -4 -0.55 0.75 2
 2 24 4 36.52 2.26 3
 -2 24 -4 34.27 2.33 2
 2 -24 4 40 2.3 1
 -3 24 -4 54.35 2.84 2
 3 -24 4 48.96 2.72 1
 3 24 4 49.92 2.66 3
 -4 24 -4 6.91 1.36 2
 4 24 4 8.35 1.43 3
 4 -24 4 8.23 1.43 1
 -5 24 -4 34.8 2.37 2
 5 24 4 33.83 2.34 3
 5 -24 4 37.66 2.6 1
 6 -24 4 1.64 1.23 1
 -6 24 -4 1.22 1.11 2
 6 24 4 2.46 1.16 3
 6 25 -4 18.26 1.81 3
 6 -25 -4 20.01 1.99 1
 -6 -25 4 19.28 1.99 2
 -5 -25 4 6.34 1.42 2
 5 -25 -4 6.38 1.35 1
 5 25 -4 9.58 1.45 3
 -4 -25 4 1.12 1.02 2
 4 -25 -4 -0.27 0.89 1
 -3 -25 4 18.34 1.89 2
 3 -25 -4 14.31 1.58 1
 -2 -25 4 1.32 0.97 2
 2 -25 -4 1.43 0.82 1
 1 -25 -4 60.21 2.63 1
 1 25 -4 54.73 2.9 2
 0 25 -4 1.37 1.04 2
 0 25 4 0.99 0.99 3
 1 25 4 11.31 1.51 3
 -1 25 -4 10.48 1.54 2
 -2 25 -4 2.53 1.17 2
 2 25 4 2.62 1.14 3
 2 -25 4 2.71 1.13 1
 -3 25 -4 -1.03 0.93 2
 3 25 4 -1.62 0.83 3
 3 -25 4 0.69 0.98 1
 4 -25 4 1.41 1.08 1
 -4 25 -4 1.89 1.11 2
 4 25 4 -0.89 1.06 3
 5 -25 4 0.47 1.13 1
 5 25 4 0.4 0.99 3
 -5 25 -4 0.71 1.08 2
 -4 -26 4 17.82 1.9 2
 4 -26 -4 16.61 1.71 1
 3 -26 -4 1.31 0.94 1
 -3 -26 4 -0.16 0.98 2
 -2 -26 4 13.65 1.68 2
 2 -26 -4 11.92 1.45 1
 1 26 -4 7.27 1.41 2
 -1 -26 4 6.55 1.33 2
 0 26 4 3.36 1.19 3
 0 26 -4 3.64 1.25 2
 -1 26 -4 4.36 1.27 2
 1 26 4 5.47 1.32 3
 2 26 4 6 1.37 3
 -2 26 -4 4.58 1.35 2
 2 -26 4 4.54 1.16 1
 3 -26 4 0.83 1.07 1
 -3 26 -4 -0.29 1.02 2
 3 26 4 -1.39 0.96 3
 4 -26 4 3.27 1.29 1
 -4 26 -4 3.24 1.33 2
 4 26 4 3.87 1.31 3
 -2 -27 4 4.03 1.28 2
 -1 -27 4 13.02 1.74 2
 0 27 -4 11.61 1.7 2
 1 27 4 0.79 1.06 3
 -1 27 -4 -0.63 0.99 2
 -2 27 -4 4.61 1.36 2
 2 27 4 3.86 1.29 3
 -14 0 5 -0.94 0.97 2
 14 0 -5 -0.32 0.99 3
 -13 0 5 -0.83 0.88 2
 13 0 -5 1.74 1.11 3
 12 0 -5 -0.19 0.94 3
 -12 0 5 0.53 0.81 2
 11 0 -5 -0.56 0.76 3
 -11 0 5 -0.02 0.67 2
 -10 0 5 0.09 0.61 2
 10 0 -5 0.19 0.64 3
 9 0 -5 -0.38 0.4 1
 -9 0 5 1 0.69 2
 9 0 -5 -0.12 0.67 3
 8 0 -5 -0.06 0.43 1
 8 0 -5 0.19 0.56 3
 -8 0 5 1.21 0.62 2
 7 0 -5 -0.71 0.47 3
 7 0 -5 -0.29 0.33 1
 -7 0 5 0.34 0.47 2
 6 0 -5 0.14 0.42 3
 -6 0 5 0.21 0.4 2
 6 0 -5 0.14 0.31 1
 5 0 -5 1.21 0.35 1
 -5 0 5 0.77 0.4 2
 5 0 -5 -0.16 0.38 3
 -4 0 5 0.03 0.28 2
 4 0 -5 0.2 0.39 3
 4 0 -5 0.07 0.27 1
 3 0 -5 0.01 0.27 1
 -3 0 5 -0.02 0.24 2
 3 0 -5 0.81 0.36 3
 2 0 -5 1.29 0.42 3
 2 0 -5 0.43 0.36 1
 -2 0 5 0.95 0.29 2
 1 0 -5 0.09 0.17 2
 -1 0 5 0.03 0.26 3
 1 0 -5 0.2 0.26 1
 0 0 5 0.45 0.26 3
 0 0 -5 0.55 0.23 2
 0 0 -5 0.24 0.28 1
 -1 0 -5 1 0.33 1
 1 0 5 0.3 0.26 3
 -1 0 -5 -0.02 0.23 2
 -2 0 -5 0.37 0.28 2
 2 0 5 -0.2 0.24 3
 -2 0 -5 -0.11 0.26 1
 -3 0 -5 0.1 0.28 2
 -3 0 -5 0.49 0.32 1
 3 0 5 0.06 0.28 3
 -4 0 -5 0.55 0.4 2
 4 0 5 0.06 0.32 1
 4 0 5 0.12 0.31 3
 5 0 5 0.72 0.44 1
 5 0 5 -0.38 0.33 3
 -5 0 -5 -0.29 0.44 2
 -6 0 -5 0.01 0.48 2
 6 0 5 -0.1 0.46 1
 6 0 5 -0.51 0.4 3
 -7 0 -5 -0.42 0.51 2
 7 0 5 -0.3 0.45 3
 7 0 5 -0.11 0.55 1
 -8 0 -5 -0.79 0.59 2
 8 0 5 1.01 0.61 3
 8 0 5 -0.76 0.6 1
 -9 0 -5 0.18 0.67 2
 9 0 5 0.03 0.6 3
 9 0 5 0 0.67 1
 -10 0 -5 0.6 0.77 2
 -11 0 -5 0.64 0.87 2
 -12 0 -5 -0.55 0.86 2
 -13 0 -5 -1.22 0.87 2
 14 -1 -5 5.45 1.36 3
 -14 1 5 5.83 1.38 2
 14 1 -5 7.35 1.46 3
 -14 -1 5 4.46 1.32 2
 -13 -1 5 22.88 1.98 2
 -13 1 5 22.83 1.99 2
 13 -1 -5 23.64 2 3
 13 1 -5 24.41 2 3
 12 1 -5 23.92 1.92 3
 -12 1 5 21.93 1.75 2
 -12 -1 5 20.25 1.74 2
 12 -1 -5 20.4 1.76 3
 11 1 -5 2.16 0.98 3
 -11 -1 5 0.84 0.8 2
 11 -1 -5 2.26 0.98 3
 -11 1 5 1.77 0.85 2
 -10 -1 5 2.33 0.79 2
 10 -1 -5 2.02 0.85 3
 10 1 -5 3.01 0.85 3
 -10 1 5 2.48 0.79 2
 9 -1 -5 15.78 1.03 1
 9 -1 -5 13.76 1.19 3
 9 1 -5 15.28 1.29 3
 -9 1 5 15.26 1.24 2
 -9 -1 5 14.2 1.19 2
 -8 1 5 -0.17 0.55 2
 8 -1 -5 -0.21 0.64 3
 8 1 -5 -0.03 0.4 1
 8 1 -5 -0.68 0.57 3
 8 -1 -5 0.78 0.45 1
 -8 -1 5 -0.14 0.57 2
 7 1 -5 14.85 1.09 3
 7 -1 -5 15.23 0.9 1
 -7 -1 5 14.18 1.01 2
 7 1 -5 15.18 0.83 1
 -7 1 5 15.67 1.06 2
 7 -1 -5 14.74 1.09 3
 -6 1 5 7.5 0.7 2
 6 -1 -5 6.53 0.78 3
 6 1 -5 7.33 0.61 1
 6 1 -5 7.94 0.78 3
 -6 -1 5 7.2 0.73 2
 6 -1 -5 7.83 0.65 1
 5 -1 -5 378.09 6.3 1
 5 1 -5 389 6.21 1
 5 1 -5 377.82 6.53 3
 5 -1 -5 382.91 6.57 3
 -5 1 5 384.17 6.3 2
 -5 -1 5 379.7 6.38 2
 4 1 -5 234.9 4.09 1
 -4 1 5 244.09 4.05 2
 -4 -1 5 239.38 4.15 2
 4 -1 -5 232.73 4.18 1
 4 -1 -5 234.82 4.37 3
 4 1 -5 238.49 4.35 3
 3 1 -5 484.91 7.67 1
 -3 1 5 488.93 7.41 2
 -3 -1 5 499.03 7.55 2
 3 -1 -5 491.81 7.79 3
 3 -1 -5 498.37 7.76 1
 3 1 -5 483.44 7.73 3
 2 -1 -5 1784.71 25.94 1
 2 1 -5 1799.08 25.52 2
 -2 1 5 1801.23 25.56 2
 2 -1 -5 1761.43 25.51 3
 2 1 -5 1783.8 25.9 1
 2 1 -5 1762.82 25.45 3
 1 -1 -5 246.55 4.25 1
 1 1 -5 242.67 4.21 1
 1 -1 -5 245.33 3.79 2
 1 1 -5 247.39 4.08 3
 1 1 -5 247.8 3.95 2
 -1 1 5 244.71 4.14 3
 0 1 -5 96.64 2.09 1
 0 -1 5 94.91 1.87 3
 0 -1 -5 99.3 1.77 2
 0 1 5 98.55 1.97 3
 0 1 -5 95.76 1.89 2
 1 1 5 82.96 1.7 3
 -1 1 -5 82.7 1.89 1
 -1 1 -5 83.81 1.79 2
 1 -1 5 83.1 1.59 3
 -1 -1 -5 81.69 1.68 2
 -1 -1 -5 80.45 1.88 1
 -2 -1 -5 4.78 0.45 2
 -2 1 -5 5.34 0.5 1
 2 1 5 5.82 0.47 3
 -2 -1 -5 4.89 0.5 1
 2 -1 5 5.72 0.4 3
 -2 1 -5 6.11 0.53 2
 -3 -1 -5 413.39 6.84 2
 3 1 5 409.71 6.44 3
 3 -1 5 412.32 6.81 1
 -3 -1 -5 422.02 6.81 1
 3 -1 5 424.46 6.3 3
 -3 1 -5 419.07 6.93 2
 4 1 5 165.28 3.26 1
 4 1 5 170.99 3.09 3
 4 -1 5 168.36 2.92 3
 -4 -1 -5 170.55 3.51 2
 -4 1 -5 160.96 3.5 2
 4 -1 5 167.22 3.32 1
 -5 -1 -5 186.42 3.99 2
 -5 1 -5 181.45 3.98 2
 5 -1 5 187.56 3.33 3
 5 1 5 190.6 3.49 3
 5 -1 5 183.94 3.7 1
 5 1 5 186.13 3.62 1
 -6 1 -5 179.68 4.15 2
 -6 -1 -5 183.83 4.16 2
 6 1 5 179.09 3.65 1
 6 1 5 187.86 3.6 3
 6 -1 5 186.39 3.8 1
 6 -1 5 183.76 3.42 3
 7 -1 5 2.66 0.7 1
 7 1 5 3.05 0.6 3
 -7 1 -5 2.71 0.73 2
 -7 -1 -5 3.67 0.8 2
 7 1 5 4.01 0.7 1
 7 -1 5 3.32 0.59 3
 -8 1 -5 10.05 1.21 2
 -8 -1 -5 9.19 1.12 2
 8 -1 5 7.74 0.99 1
 8 1 5 9.5 1 1
 8 1 5 8.74 0.92 3
 8 -1 5 8.9 0.85 3
 9 1 5 25.32 1.5 1
 9 1 5 28.33 1.45 3
 -9 -1 -5 26.53 1.76 2
 -9 1 -5 27.18 1.78 2
 9 -1 5 27.19 1.58 1
 10 1 5 5.11 0.89 3
 -10 -1 -5 4.83 1.1 2
 10 -1 5 5.4 1 1
 -10 1 -5 4.91 1.1 2
 -11 1 -5 16.99 1.7 2
 -11 -1 -5 16.54 1.67 2
 -12 -1 -5 8.58 1.48 2
 -13 1 -5 5.94 1.4 2
 -13 -1 -5 3.57 1.36 2
 14 2 -5 13.56 1.75 3
 -14 2 5 11.85 1.7 2
 -14 -2 5 14.61 1.77 2
 13 -2 -5 0.8 1.1 3
 13 2 -5 3.97 1.26 3
 -13 -2 5 2.65 1.21 2
 -13 2 5 1.63 1.11 2
 12 2 -5 14.44 1.52 3
 -12 -2 5 15.51 1.57 2
 12 -2 -5 13.65 1.53 3
 -12 2 5 15.74 1.62 2
 11 -2 -5 61.56 2.59 3
 11 2 -5 58.03 2.56 3
 -11 -2 5 61.41 2.64 2
 -11 2 5 62.7 2.65 2
 -10 2 5 24.49 1.6 2
 10 -2 -5 23.22 1.57 3
 10 -2 -5 27.34 1.35 1
 10 2 -5 26.97 1.74 3
 -10 -2 5 24.45 1.62 2
 -9 -2 5 2.38 0.81 2
 9 -2 -5 2.17 0.58 1
 9 -2 -5 2.72 0.78 3
 9 2 -5 3.27 0.87 3
 -9 2 5 2.79 0.77 2
 8 -2 -5 23.6 1.48 3
 -8 -2 5 25.72 1.5 2
 8 2 -5 27.19 1.09 1
 8 2 -5 25.79 1.53 3
 -8 2 5 24.63 1.34 2
 8 -2 -5 26.08 1.25 1
 7 -2 -5 1.3 0.48 1
 -7 2 5 -0.15 0.46 2
 -7 -2 5 2.83 0.63 2
 7 -2 -5 1.46 0.57 3
 7 2 -5 0.62 0.55 3
 7 2 -5 1.15 0.39 1
 6 -2 -5 250.26 4.65 1
 6 -2 -5 250.76 4.94 3
 -6 2 5 257.6 4.72 2
 -6 -2 5 261.61 4.87 2
 6 2 -5 261.58 4.43 1
 6 2 -5 257.5 4.95 3
 -5 2 5 562.47 8.66 2
 5 2 -5 548.16 8.91 3
 5 -2 -5 551.33 8.82 1
 5 2 -5 556.74 8.58 1
 5 -2 -5 546.26 8.97 3
 -5 -2 5 549.79 8.84 2
 -4 -2 5 707.01 10.65 2
 4 2 -5 694.92 10.54 1
 -4 2 5 685.33 10.39 2
 4 -2 -5 696.54 10.79 3
 4 -2 -5 694.57 10.72 1
 4 2 -5 691.01 10.72 3
 3 -2 -5 578.03 8.96 3
 -3 -2 5 580.98 8.78 2
 -3 2 5 559.3 8.49 2
 3 2 -5 570.24 8.86 3
 3 2 -5 572.21 8.81 1
 3 -2 -5 577.02 8.97 1
 2 2 -5 72.6 1.68 3
 2 -2 -5 70.8 1.72 1
 2 2 -5 73.9 1.61 2
 2 2 -5 73.45 1.66 1
 -2 2 5 74.33 1.3 2
 -2 2 5 76.65 1.8 3
 1 2 -5 214.29 3.58 2
 1 -2 -5 212.36 3.35 2
 -1 2 5 211.39 3.72 3
 1 2 -5 211.76 3.71 1
 1 -2 -5 210.62 3.8 1
 1 2 -5 215.73 3.6 3
 0 -2 -5 736.77 11.26 1
 0 -2 -5 750.34 10.83 2
 0 2 5 725.51 10.93 3
 0 -2 5 734.71 10.76 3
 0 2 -5 739.97 11.21 1
 0 2 -5 739.35 11.01 2
 -1 -2 -5 1123.06 16.79 1
 1 -2 5 1130.64 16.15 3
 -1 -2 -5 1134.39 16.39 2
 1 2 5 1129.21 16.31 3
 -1 2 -5 1126.54 16.58 2
 -2 -2 -5 89.76 2.02 2
 -2 2 -5 96.97 2.16 2
 2 -2 5 93.04 1.64 3
 2 2 5 95.28 1.95 3
 -2 -2 -5 92.78 2.09 1
 -3 2 -5 4.88 0.56 2
 -3 -2 -5 4.1 0.5 2
 3 2 5 4.08 0.48 3
 3 -2 5 4.01 0.33 3
 -3 -2 -5 3.76 0.48 1
 3 -2 5 3.78 0.49 1
 -4 2 -5 448.56 7.57 2
 4 -2 5 428.38 7.31 1
 4 -2 5 445.21 6.67 3
 -4 -2 -5 447.92 7.23 1
 -4 -2 -5 443.83 7.44 2
 4 2 5 448.61 7.04 3
 5 2 5 112.42 2.53 1
 5 -2 5 118.91 2.74 1
 5 2 5 115.17 2.52 3
 -5 -2 -5 118.53 2.92 2
 5 -2 5 116.87 2.25 3
 -5 2 -5 121.72 3.01 2
 6 2 5 24.21 1.14 3
 6 -2 5 20.84 0.92 3
 -6 -2 -5 21.26 1.28 2
 -6 2 -5 22.83 1.39 2
 6 2 5 23.56 1.08 1
 6 -2 5 19.94 1.2 1
 7 2 5 74.74 2.13 3
 -7 -2 -5 74.51 2.55 2
 7 -2 5 74.96 2.28 1
 -7 2 -5 76.21 2.63 2
 7 2 5 73.18 2.07 1
 7 -2 5 77 1.94 3
 8 -2 5 61.31 1.82 3
 -8 2 -5 58.86 2.47 2
 8 -2 5 58.27 2.15 1
 -8 -2 -5 53.57 2.4 2
 8 2 5 58.45 1.92 1
 8 2 5 59.99 2 3
 -9 -2 -5 16.95 1.51 2
 9 2 5 16.67 1.24 3
 9 -2 5 18.63 1.44 1
 -9 2 -5 19.02 1.55 2
 10 -2 5 9.76 1.19 1
 10 2 5 11.23 1.14 3
 -10 2 -5 8.09 1.24 2
 -10 -2 -5 9.15 1.29 2
 -11 -2 -5 -0.05 0.78 2
 -11 2 -5 0.71 0.93 2
 -12 -2 -5 0.6 0.92 2
 -12 2 -5 0.72 0.99 2
 -13 2 -5 11.06 1.72 2
 -13 -2 -5 15.46 1.91 2
 14 3 -5 0.1 1.05 3
 -14 -3 5 -0.31 0.98 2
 -14 3 5 1.76 1.01 2
 -13 3 5 22.48 1.96 2
 13 -3 -5 22.23 1.92 3
 -13 -3 5 21.04 1.94 2
 13 3 -5 26.85 2.14 3
 -12 -3 5 31.72 2.16 2
 12 3 -5 33.94 2.14 3
 -12 3 5 35.24 2.17 2
 12 -3 -5 31.44 2.11 3
 11 -3 -5 54.3 2.5 3
 -11 3 5 57.36 2.47 2
 -11 -3 5 59.87 2.64 2
 11 3 -5 58 2.61 3
 10 -3 -5 11.22 1.23 3
 10 -3 -5 12.65 1.05 1
 -10 3 5 11.55 1.21 2
 10 3 -5 11.3 1.26 3
 -10 -3 5 11.88 1.24 2
 -9 -3 5 71.84 2.55 2
 9 -3 -5 72.64 2.25 1
 9 3 -5 70 2.52 3
 9 -3 -5 72.2 2.56 3
 -9 3 5 68.97 2.42 2
 8 3 -5 144.2 3.68 3
 -8 -3 5 144.41 3.62 2
 -8 3 5 151.54 3.52 2
 8 -3 -5 143.13 3.33 1
 8 -3 -5 143.66 3.61 3
 -7 3 5 226.87 4.54 2
 7 3 -5 230.46 4.79 3
 7 -3 -5 230.23 4.76 3
 7 3 -5 238.09 4.09 1
 -7 -3 5 234.69 4.76 2
 7 -3 -5 234.31 4.54 1
 -6 3 5 74.83 1.96 2
 -6 -3 5 72.32 2.1 2
 6 3 -5 78.21 1.72 1
 6 -3 -5 70.95 1.98 1
 6 3 -5 73.15 2.16 3
 6 -3 -5 68.59 2.11 3
 5 -3 -5 197.93 3.88 1
 5 3 -5 206.7 3.58 1
 5 -3 -5 209.98 4.11 3
 -5 3 5 202.66 3.71 2
 5 3 -5 206.55 4.06 3
 -5 -3 5 207.46 3.99 2
 4 3 -5 0.59 0.29 1
 -4 -3 5 1.13 0.39 2
 4 3 -5 0.45 0.41 3
 4 -3 -5 1.44 0.5 3
 4 -3 -5 1.46 0.41 1
 -4 3 5 1.92 0.35 2
 3 -3 -5 20.39 0.92 1
 -3 -3 5 19.8 0.84 2
 3 3 -5 19.41 0.76 1
 -3 3 5 19.59 0.62 2
 3 3 -5 18.56 0.89 3
 -3 3 5 19.72 0.96 3
 2 -3 -5 64.12 1.61 1
 2 3 -5 62.62 1.53 3
 -2 3 5 63.97 1.64 3
 2 3 -5 60.09 1.45 1
 -2 3 5 61.91 1.09 2
 2 3 -5 63.69 1.52 2
 1 3 -5 225.36 3.85 2
 1 3 -5 217.48 3.71 3
 -1 3 5 231.57 3.96 3
 1 3 -5 225.3 3.88 1
 0 3 -5 37.49 1.14 1
 0 -3 -5 36.94 1.18 1
 0 3 -5 39.1 1.15 2
 0 3 -5 39.86 0.98 3
 0 -3 -5 38.25 0.82 2
 -1 -3 -5 -0.12 0.2 2
 -1 -3 -5 0.44 0.29 1
 1 -3 5 0.41 0.2 3
 -1 3 -5 0.51 0.31 1
 1 -3 5 -0.31 0.23 1
 -1 3 -5 0.25 0.28 2
 1 3 5 0.73 0.3 3
 -2 3 -5 238.76 4.29 2
 -2 -3 -5 237.69 4.04 2
 2 3 5 235.17 4.03 3
 2 -3 5 232.47 4.19 1
 -2 -3 -5 236.96 4.21 1
 2 -3 5 233.51 3.58 3
 -3 -3 -5 22.99 1 2
 -3 3 -5 24.13 1.1 2
 3 -3 5 23.97 1.04 1
 3 -3 5 23.51 0.61 3
 3 3 5 22.39 0.96 3
 -3 -3 -5 24.17 0.97 1
 -4 -3 -5 19.14 0.89 1
 4 -3 5 17.55 0.61 3
 -4 3 -5 18.32 1.06 2
 4 -3 5 20.21 1.05 1
 -4 -3 -5 19.83 1.06 2
 4 3 5 19.71 0.96 3
 -5 3 -5 0.43 0.48 2
 5 -3 5 0.45 0.48 1
 -5 -3 -5 0.8 0.51 2
 5 3 5 0.17 0.38 1
 5 3 5 0.36 0.46 3
 5 -3 5 -0.01 0.29 3
 -6 -3 -5 182.51 4.17 2
 6 3 5 184.58 3.61 1
 6 3 5 190.32 3.76 3
 6 -3 5 184.69 3.96 1
 6 -3 5 192.23 3.32 3
 -6 3 -5 182.26 4.24 2
 -7 -3 -5 81.31 2.64 2
 7 3 5 79.02 2.26 3
 7 -3 5 76.56 1.89 3
 7 3 5 76.65 2.09 1
 7 -3 5 76.94 2.4 1
 -7 3 -5 81.32 2.73 2
 -8 3 -5 -0.44 0.66 2
 8 -3 5 0.69 0.68 1
 8 3 5 -0.55 0.58 3
 -8 -3 -5 -0.28 0.63 2
 8 3 5 0.21 0.63 1
 -9 -3 -5 5.66 1.05 2
 9 3 5 4.29 0.86 3
 -9 3 -5 3.73 0.97 2
 9 -3 5 6.78 1.03 1
 10 3 5 8.14 1.05 3
 10 -3 5 7.91 1.16 1
 -10 -3 -5 7.48 1.25 2
 -10 3 -5 8.55 1.34 2
 -11 3 -5 6.81 1.29 2
 -11 -3 -5 8.22 1.33 2
 -12 3 -5 0.86 0.93 2
 -12 -3 -5 2.93 1.11 2
 -13 -3 -5 1.01 1.16 2
 -13 3 -5 1.4 1.1 2
 14 4 -5 15.36 1.86 3
 -14 4 5 13.25 1.71 2
 -14 -4 5 13.49 1.74 2
 -13 4 5 2.66 1.04 2
 -13 -4 5 2.84 1.2 2
 13 -4 -5 1.16 1.07 3
 13 4 -5 2.15 1.14 3
 12 4 -5 40.83 2.38 3
 -12 4 5 39.61 2.29 2
 -12 -4 5 41.56 2.36 2
 12 -4 -5 41.2 2.32 3
 -11 -4 5 53.66 2.48 2
 11 4 -5 51.41 2.51 3
 11 -4 -5 49.71 2.37 3
 -11 4 5 50.04 2.35 2
 -10 -4 5 0.24 0.74 2
 10 -4 -5 2.22 0.79 3
 -10 4 5 0.81 0.69 2
 10 4 -5 2.08 0.87 3
 10 -4 -5 0.36 0.57 1
 -9 -4 5 109.6 3.27 2
 9 4 -5 112.41 3.3 3
 9 -4 -5 108.27 2.91 1
 9 -4 -5 108.37 3.2 3
 -9 4 5 115.38 3.16 2
 8 -4 -5 35.55 1.69 3
 -8 -4 5 38.65 1.77 2
 8 -4 -5 36.4 1.59 1
 -8 4 5 36.85 1.6 2
 8 4 -5 39.97 1.81 3
 7 -4 -5 220.57 4.62 3
 -7 -4 5 220.02 4.65 2
 7 -4 -5 216.83 4.43 1
 7 4 -5 227.67 4.72 3
 7 4 -5 224.33 3.84 1
 6 4 -5 17.15 0.71 1
 6 -4 -5 16.27 1.1 3
 6 4 -5 16.07 1.05 3
 -6 -4 5 15.53 1.01 2
 6 -4 -5 15.7 0.97 1
 -6 4 5 16.77 0.92 2
 -5 4 5 246.04 4.25 2
 5 4 -5 237.36 3.96 1
 5 -4 -5 237.7 4.48 1
 5 -4 -5 239.48 4.58 3
 5 4 -5 233.65 4.53 3
 -5 -4 5 232.04 4.49 2
 4 4 -5 1647.9 23.96 3
 4 -4 -5 1685.98 24.36 1
 4 4 -5 1601.13 23.91 1
 -4 4 5 1651.34 23.75 2
 -4 4 5 1628.52 24.02 3
 -4 -4 5 1689.65 24.15 2
 3 -4 -5 381.96 6.37 1
 3 4 -5 386.25 6.26 3
 3 4 -5 380.95 6.04 1
 -3 -4 5 376.44 6.26 2
 -3 4 5 380.14 5.8 2
 -3 4 5 389.06 6.4 3
 2 4 -5 1045.02 15.4 3
 2 4 -5 1068.79 15.63 2
 2 4 -5 1053.73 15.59 1
 -2 4 5 1046.14 16.45 2
 -2 4 5 1068.72 15.62 3
 -1 4 5 329.06 5.48 3
 1 4 -5 327.23 5.22 3
 1 4 -5 332.47 5.41 1
 1 -4 -5 336.86 5.59 1
 1 4 -5 336.04 5.48 2
 0 4 -5 2776.67 39.65 3
 0 4 -5 2841.97 40.38 1
 0 4 5 2845.66 39.68 3
 0 4 -5 2828.15 40.11 2
 0 -4 -5 2828.97 40.49 1
 0 -4 -5 2735.61 40.55 2
 -1 -4 -5 239.76 3.94 2
 1 4 5 245.33 4.2 3
 1 -4 5 242.77 3.74 3
 -1 -4 -5 242.83 4.32 1
 -1 4 -5 247.85 4.35 2
 -2 -4 -5 56.24 1.44 2
 -2 4 -5 60.67 1.69 2
 2 4 5 57.08 1.52 3
 -2 -4 -5 59.04 1.58 1
 2 -4 5 58.84 1.59 1
 -3 4 -5 77.61 2.11 2
 -3 -4 -5 77.38 1.9 1
 3 4 5 79.26 1.93 3
 -3 -4 -5 78.19 1.94 2
 4 4 5 212.27 4 3
 -4 -4 -5 217.83 4.22 2
 -4 4 -5 220.05 4.43 2
 -4 -4 -5 218.97 3.98 1
 4 -4 5 218.83 3.36 3
 4 -4 5 218.87 4.21 1
 5 -4 5 282.22 5.3 1
 5 4 5 281.87 4.95 1
 5 -4 5 289.96 4.44 3
 -5 4 -5 283.88 5.58 2
 5 4 5 286.97 5.1 3
 -5 -4 -5 284.01 5.43 2
 -6 -4 -5 163.45 3.82 2
 -6 4 -5 158.76 3.89 2
 6 -4 5 158.59 3.63 1
 6 4 5 158.11 3.2 1
 6 4 5 162.68 3.46 3
 6 -4 5 162.15 2.86 3
 7 4 5 0.73 0.61 3
 7 -4 5 2.09 0.73 1
 -7 -4 -5 1.36 0.72 2
 -7 4 -5 2.78 0.77 2
 7 4 5 1.23 0.51 1
 8 -4 5 39.84 1.87 1
 8 4 5 44.43 1.59 1
 8 4 5 42.58 1.8 3
 -8 -4 -5 40.3 2.01 2
 -8 4 -5 43.1 2.15 2
 -9 4 -5 1.99 0.84 2
 9 4 5 2.1 0.76 3
 -9 -4 -5 1.44 0.75 2
 9 -4 5 2.8 0.91 1
 -10 -4 -5 -0.6 0.69 2
 10 4 5 -0.03 0.67 3
 10 -4 5 0.41 0.85 1
 -10 4 -5 0.11 0.73 2
 -11 -4 -5 11.8 1.53 2
 -11 4 -5 10.27 1.46 2
 11 4 5 12.29 1.28 3
 11 -4 5 9.17 1.31 1
 -12 -4 -5 4.19 1.25 2
 -12 4 -5 3.61 1.19 2
 -13 4 -5 1.74 1.12 2
 -13 -4 -5 3.06 1.23 2
 14 5 -5 -0.29 1.07 3
 -14 5 5 0.74 1.03 2
 -14 -5 5 -0.35 0.9 2
 -13 -5 5 0.85 0.99 2
 13 5 -5 -1.63 0.88 3
 -13 5 5 0.1 0.93 2
 -12 5 5 2.9 0.98 2
 12 -5 -5 4.03 1.13 3
 12 5 -5 3.59 1.13 3
 -12 -5 5 5.05 1.2 2
 11 -5 -5 5.99 1.14 3
 11 -5 -5 7.07 0.98 1
 -11 5 5 5.17 1.05 2
 11 5 -5 7.06 1.18 3
 -11 -5 5 8.39 1.22 2
 10 -5 -5 0.91 0.8 3
 -10 -5 5 1.75 0.82 2
 -10 5 5 1.69 0.78 2
 10 -5 -5 1.94 0.72 1
 10 5 -5 2.34 0.85 3
 -9 -5 5 17.81 1.45 2
 9 -5 -5 16.01 1.17 1
 9 5 -5 17.18 1.38 3
 9 -5 -5 15.12 1.27 3
 -9 5 5 16.73 1.28 2
 8 -5 -5 203.68 4.51 3
 8 5 -5 203.16 4.59 3
 8 -5 -5 196.45 4.33 1
 -8 -5 5 200.09 4.58 2
 -8 5 5 196.21 4.28 2
 7 -5 -5 13.16 1.08 3
 7 -5 -5 13.12 1.07 1
 7 5 -5 12.42 1.05 3
 -7 5 5 12.99 0.95 2
 -7 -5 5 13.84 1.1 2
 6 5 -5 -0.02 0.23 1
 6 5 -5 0.44 0.46 3
 6 -5 -5 0.47 0.52 3
 -6 5 5 1.1 0.44 2
 6 -5 -5 -0.46 0.41 1
 -6 -5 5 0.23 0.48 2
 -5 5 5 269.3 4.99 3
 5 5 -5 259.44 4.24 1
 5 5 -5 262.74 4.95 3
 -5 -5 5 261.99 4.93 2
 5 -5 -5 268.2 4.97 1
 -5 5 5 261.81 4.55 2
 -4 5 5 47.43 1.57 3
 4 5 -5 47.02 1.53 3
 -4 -5 5 47.52 1.53 2
 -4 5 5 48.57 1.23 2
 4 -5 -5 49.34 1.56 1
 4 5 -5 48.16 1.15 1
 3 5 -5 211.04 3.9 3
 3 5 -5 218.71 3.61 1
 -3 5 5 213.59 3.44 2
 -3 -5 5 217.28 3.99 2
 -3 5 5 210.04 4.01 3
 3 -5 -5 213.87 4.04 1
 -2 5 5 280.8 4.89 3
 2 -5 -5 283.15 4.95 1
 2 5 -5 278.77 4.87 2
 2 5 -5 285.61 4.71 3
 -2 5 5 276.21 4.32 2
 2 5 -5 283.39 4.63 1
 1 -5 -5 2126.8 31 1
 -1 5 5 2144.9 30.46 3
 1 5 -5 2108.36 30.16 3
 1 5 -5 2189.02 30.78 2
 -1 -5 5 2103.61 30.79 1
 0 -5 5 1142.53 16.8 1
 0 -5 -5 1142.72 16.96 1
 0 -5 -5 1114.66 16.37 2
 0 5 -5 1152.87 16.85 2
 0 5 5 1131.43 16.62 3
 0 5 -5 1123.22 16.22 3
 1 -5 5 5.85 0.52 1
 1 5 5 5.41 0.54 3
 -1 5 -5 5.71 0.34 3
 -1 5 -5 5.97 0.58 2
 -1 -5 -5 5.52 0.52 1
 -1 -5 -5 5.57 0.44 2
 -2 -5 -5 289.98 4.96 1
 -2 -5 -5 284.84 4.75 2
 2 5 5 279.73 4.88 3
 2 -5 5 289.9 5.02 1
 -2 5 -5 281.75 5.11 2
 -3 -5 -5 107.83 2.38 1
 3 5 5 108.37 2.43 3
 3 -5 5 111.14 2.56 1
 -3 -5 -5 108.34 2.42 2
 -3 5 -5 107.83 2.65 2
 -4 5 -5 49.33 1.77 2
 4 5 5 50.07 1.58 3
 -4 -5 -5 49.53 1.62 2
 4 -5 5 49.75 1.65 1
 -4 -5 -5 51.06 1.47 1
 5 -5 5 43.96 1.7 1
 -5 -5 -5 41.78 1.32 1
 -5 -5 -5 41.86 1.62 2
 5 -5 5 41.69 0.93 3
 -5 5 -5 39.59 1.68 2
 5 5 5 39.93 1.53 3
 6 5 5 0.4 0.39 1
 6 -5 5 0.45 0.6 1
 -6 5 -5 0.21 0.52 2
 -6 -5 -5 0.18 0.53 2
 6 -5 5 0.43 0.3 3
 6 5 5 0.24 0.51 3
 -7 -5 -5 3.83 0.84 2
 7 5 5 2.06 0.54 1
 7 -5 5 3.81 0.83 1
 7 5 5 4.07 0.77 3
 -7 5 -5 3.15 0.8 2
 -8 -5 -5 45.43 2.13 2
 8 -5 5 46.45 2.05 1
 -8 5 -5 49.37 2.24 2
 8 5 5 48.87 1.94 3
 -9 5 -5 14.83 1.48 2
 9 5 5 17.21 1.33 3
 -9 -5 -5 14.96 1.44 2
 9 -5 5 15.19 1.42 1
 -10 5 -5 14.93 1.55 2
 10 -5 5 14.91 1.5 1
 10 5 5 14.21 1.29 3
 -10 -5 -5 11.91 1.4 2
 -11 5 -5 4.54 1.16 2
 -11 -5 -5 6.38 1.28 2
 11 -5 5 4.04 1.12 1
 11 5 5 4.59 0.99 3
 -12 -5 -5 1.61 1.04 2
 -12 5 -5 0.46 0.92 2
 -13 5 -5 0.78 1.02 2
 -13 -5 -5 -0.48 1.02 2
 -14 -6 5 -0.95 0.88 2
 14 6 -5 1.15 1.2 3
 -13 -6 5 12.01 1.64 2
 -13 6 5 11.69 1.52 2
 13 6 -5 8.91 1.48 3
 12 -6 -5 14.18 1.5 3
 -12 6 5 14.16 1.5 2
 -12 -6 5 11.1 1.46 2
 12 6 -5 14.64 1.64 3
 11 6 -5 24.68 1.83 3
 11 -6 -5 27.07 1.66 1
 11 -6 -5 24.25 1.77 3
 -11 6 5 24.04 1.71 2
 -11 -6 5 26.48 1.86 2
 10 -6 -5 2.81 0.88 3
 10 6 -5 1.61 0.8 3
 -10 -6 5 0.77 0.75 2
 -10 6 5 0.72 0.68 2
 10 -6 -5 2.98 0.79 1
 -9 6 5 6.36 0.89 2
 9 -6 -5 6 0.87 1
 9 6 -5 4.51 0.97 3
 -9 -6 5 4.54 0.95 2
 9 -6 -5 5.73 0.91 3
 8 -6 -5 84.52 2.62 1
 -8 6 5 87.21 2.53 2
 8 -6 -5 90.13 2.71 3
 8 6 -5 83.44 2.73 3
 -8 -6 5 87.91 2.81 2
 7 -6 -5 -0.34 0.48 1
 -7 6 5 -0.35 0.42 2
 -7 -6 5 0.12 0.53 2
 7 -6 -5 -0.03 0.56 3
 7 6 -5 -0.42 0.53 3
 -6 6 5 156.21 3.24 2
 6 6 -5 160.03 3.61 3
 6 6 -5 155.5 2.6 1
 -6 6 5 159.52 3.56 3
 6 -6 -5 154.8 3.55 1
 -6 -6 5 158.09 3.62 2
 -5 -6 5 8.71 0.78 2
 5 6 -5 8.52 0.77 3
 5 6 -5 6.98 0.42 1
 -5 6 5 7.82 0.62 2
 -5 6 5 7.28 0.74 3
 5 -6 -5 7.26 0.75 1
 4 6 -5 9.46 0.48 1
 -4 -6 5 9.14 0.75 2
 4 6 -5 9.67 0.77 3
 -4 6 5 9.19 0.55 2
 4 -6 -5 7.6 0.71 1
 -4 6 5 9.3 0.77 3
 3 6 -5 42.91 1.09 1
 3 6 -5 44.17 1.45 2
 -3 6 5 41.44 1.43 3
 3 6 -5 44.54 1.4 3
 3 -6 -5 42.82 1.44 1
 -3 6 5 43.2 1.02 2
 -3 -6 5 44.04 1.45 2
 2 6 -5 181.95 3.59 2
 2 -6 -5 187.51 3.63 1
 -2 6 5 195.56 3.65 3
 -2 6 5 187.52 2.95 2
 2 6 -5 187.28 3.41 3
 -2 -6 5 184.75 3.25 1
 1 -6 -5 2989.7 43.65 2
 1 6 -5 2927.85 42.71 3
 1 -6 -5 3017.01 43.48 1
 1 6 -5 3070.44 43.17 2
 -1 -6 5 3044.41 43.23 1
 -1 6 5 3050.31 42.71 3
 0 -6 5 14.36 0.73 1
 0 -6 -5 15.6 0.81 1
 0 6 -5 15.47 0.86 2
 0 6 5 15.82 0.85 3
 0 6 -5 14.42 0.58 3
 0 -6 -5 16 0.55 2
 -1 6 -5 163.9 3.35 2
 1 6 5 167.59 3.23 3
 -1 -6 -5 161.9 2.87 2
 1 -6 5 167.62 3.22 1
 -1 6 -5 160.86 2.61 3
 -1 -6 -5 160.66 3.21 1
 -2 6 -5 0.77 0.39 2
 -2 -6 -5 1.55 0.37 1
 -2 -6 -5 1.12 0.34 2
 2 -6 5 0.9 0.39 1
 2 6 5 0.36 0.39 3
 3 6 5 449.02 7.35 3
 -3 -6 -5 456.78 7.34 2
 -3 -6 -5 443.44 7.3 1
 -3 6 -5 448.73 7.68 2
 3 -6 5 444.1 7.51 1
 -4 -6 -5 22.7 1.11 2
 -4 -6 -5 24.21 0.99 1
 4 6 5 24.41 1.21 3
 4 -6 5 25.13 1.24 1
 -4 6 -5 24.44 1.3 2
 -5 -6 -5 27.51 1.08 1
 -5 -6 -5 30.63 1.38 2
 5 -6 5 28.78 1.42 1
 5 6 5 28.61 1.36 3
 -5 6 -5 27.76 1.45 2
 -6 -6 -5 45.94 1.86 2
 -6 6 -5 44.66 1.93 2
 6 6 5 48.21 1.76 3
 6 -6 5 46.76 1.9 1
 6 6 5 47.88 1.44 1
 -7 6 -5 10.7 1.19 2
 -7 -6 -5 9.81 1.06 2
 7 6 5 10.85 0.97 3
 7 -6 5 10.77 1.13 1
 7 6 5 11.27 0.8 1
 8 -6 5 4.8 1.01 1
 -8 -6 -5 6.36 1.02 2
 8 6 5 6.21 0.93 3
 -8 6 -5 6.35 1.04 2
 9 -6 5 18.33 1.56 1
 -9 6 -5 17.23 1.55 2
 9 6 5 19.1 1.45 3
 -9 -6 -5 21.31 1.64 2
 10 6 5 8.58 1.13 3
 -10 -6 -5 7.52 1.23 2
 -10 6 -5 8.35 1.31 2
 10 -6 5 4.86 1.17 1
 11 6 5 6.24 1.11 3
 -11 -6 -5 6.2 1.26 2
 -11 6 -5 4.48 1.22 2
 11 -6 5 6.37 1.26 1
 -12 6 -5 12.55 1.74 2
 12 6 5 11.71 1.45 3
 -12 -6 -5 12.58 1.75 2
 -13 -6 -5 2.03 1.23 2
 -13 6 -5 1.52 1.12 2
 14 7 -5 0.53 1.2 3
 -14 -7 5 -0.75 0.95 2
 13 7 -5 6.78 1.39 3
 -13 -7 5 10.21 1.51 2
 -12 7 5 12.41 1.4 2
 12 -7 -5 7.92 1.15 1
 -12 -7 5 11.24 1.47 2
 12 7 -5 10.37 1.48 3
 11 -7 -5 43.31 2.23 3
 -11 7 5 40.17 2.1 2
 -11 7 5 38.37 2.09 3
 11 -7 -5 43.49 2.09 1
 -11 -7 5 38.87 2.23 2
 11 7 -5 40.49 2.3 3
 10 7 -5 4.63 1.05 3
 10 -7 -5 4.55 0.86 1
 -10 7 5 3.5 0.88 2
 -10 7 5 5.79 1 3
 -10 -7 5 3.86 0.95 2
 10 -7 -5 3.32 0.91 3
 -9 7 5 10.99 1.06 2
 -9 -7 5 11.84 1.23 2
 9 -7 -5 12.28 1.19 1
 9 7 -5 12.69 1.3 3
 -9 7 5 11.78 1.17 3
 8 -7 -5 15.26 1.21 1
 -8 -7 5 14 1.25 2
 -8 7 5 16.09 1.26 3
 8 7 -5 12.09 1.15 3
 -8 7 5 14.11 1.1 2
 7 -7 -5 33.83 1.6 1
 7 7 -5 34.54 1.7 3
 -7 7 5 32.33 1.39 2
 -7 -7 5 34.55 1.7 2
 -7 7 5 34.21 1.59 3
 -6 -7 5 44.31 1.77 2
 6 -7 -5 46.4 1.82 1
 6 7 -5 45.1 1.76 3
 -6 7 5 44.2 1.48 2
 -6 7 5 45.01 1.71 3
 -5 -7 5 9.95 0.87 2
 5 7 -5 11.89 0.9 3
 -5 7 5 12.11 0.74 2
 5 -7 -5 12.01 0.95 1
 -5 -7 5 12.76 0.46 1
 -5 7 5 11.17 0.9 3
 -4 7 5 532.83 8.77 3
 -4 7 5 541.71 8.29 2
 -4 -7 5 545.18 8.91 2
 -4 -7 5 539.85 8.08 1
 4 7 -5 531.91 8.7 3
 4 -7 -5 541.02 8.96 1
 -3 7 5 14.9 0.94 3
 3 -7 -5 14.82 0.92 1
 3 7 -5 15.26 0.89 3
 3 7 -5 15.27 0.92 2
 -3 7 5 14.53 0.59 2
 -3 -7 5 14.96 0.64 1
 2 -7 -5 132.9 2.9 1
 2 7 -5 138.68 2.71 3
 -2 7 5 133.11 2.87 3
 -2 -7 5 132.99 2.51 1
 2 7 -5 134.03 2.91 2
 -2 7 5 128.39 2.22 2
 1 7 -5 68.08 1.86 2
 -1 -7 5 67.67 1.63 1
 1 7 -5 65.61 1.55 3
 1 -7 -5 65.07 1.79 1
 -1 7 5 66.98 1.81 3
 1 -7 -5 69.21 1.3 2
 0 -7 -5 395.08 6.08 2
 0 -7 5 394.37 6.5 1
 0 7 5 401.94 6.59 3
 0 -7 -5 404.31 6.66 1
 0 7 -5 399.46 6.08 3
 1 -7 5 176.57 3.42 1
 -1 -7 -5 172.38 3.08 2
 1 7 5 179.08 3.46 3
 -1 7 -5 173.81 2.79 3
 -1 7 -5 175.03 3.59 2
 -1 -7 -5 175.42 3.43 1
 -2 -7 -5 411.38 6.71 2
 -2 -7 -5 420.9 6.94 1
 2 -7 5 421.71 7.05 1
 2 7 5 418.51 6.94 3
 -2 7 -5 422.78 7.22 2
 3 7 5 322.85 5.63 3
 -3 -7 -5 313.34 5.5 2
 -3 -7 -5 319.13 5.5 1
 3 -7 5 320.84 5.78 1
 -3 7 -5 317.55 5.9 2
 -4 7 -5 19.24 1.18 2
 4 -7 5 19.94 1.19 1
 -4 -7 -5 18.59 0.92 1
 -4 -7 -5 19.24 1.06 2
 4 7 5 19.47 1.11 3
 -5 -7 -5 129.45 3.16 2
 -5 -7 -5 134.61 2.76 1
 -5 7 -5 135.89 3.43 2
 5 7 5 129.56 3.11 3
 5 -7 5 130.79 3.28 1
 6 -7 5 213.36 4.61 1
 -6 7 -5 200.37 4.69 2
 6 7 5 208.38 4.34 3
 -6 -7 -5 204.88 4.51 2
 6 7 5 198.57 3.76 1
 -7 -7 -5 39.67 1.88 2
 7 7 5 43.27 1.84 3
 7 -7 5 39.76 1.99 1
 -7 7 -5 40 1.96 2
 -8 -7 -5 110.35 3.39 2
 8 7 5 107.13 3.09 3
 8 -7 5 106.69 3.35 1
 -9 7 -5 71.4 2.91 2
 -9 -7 -5 73.12 2.91 2
 9 -7 5 69.91 2.8 1
 9 7 5 69.82 2.53 3
 10 7 5 24.22 1.62 3
 10 -7 5 25.16 1.84 1
 -10 -7 -5 23.15 1.81 2
 -10 7 -5 25.99 2 2
 -11 -7 -5 34.4 2.26 2
 -11 7 -5 34.78 2.3 2
 11 7 5 30.34 1.96 3
 11 -7 5 31.38 2.21 1
 -12 7 -5 6.22 1.36 2
 -12 -7 -5 7.8 1.46 2
 12 -7 5 7.89 1.46 1
 12 7 5 7.3 1.26 3
 -13 7 -5 17.01 2.07 2
 -13 -7 -5 17.27 2.09 2
 14 8 -5 -0.4 0.97 3
 -14 -8 5 0.46 1.09 2
 13 8 -5 6.47 1.44 3
 -13 -8 5 8.91 1.57 2
 -12 -8 5 18.32 1.77 2
 12 8 -5 19.2 1.83 3
 12 -8 -5 19.22 1.59 1
 -12 8 5 17.06 1.54 2
 -11 8 5 2.09 0.87 2
 -11 8 5 1.26 0.9 3
 11 8 -5 1.6 0.91 3
 -11 -8 5 1.8 0.91 2
 11 -8 -5 1.91 0.87 1
 -10 -8 5 15.81 1.46 2
 -10 8 5 17.7 1.39 2
 10 -8 -5 17.27 1.37 1
 -10 8 5 15.27 1.36 3
 10 8 -5 20.54 1.61 3
 -9 8 5 87.47 2.8 3
 -9 -8 5 86.6 3.01 2
 9 8 -5 90.64 3.03 3
 9 -8 -5 89.17 2.9 1
 -9 8 5 94.89 2.81 2
 -8 8 5 78.96 2.54 3
 8 -8 -5 77.28 2.6 1
 -8 8 5 79.22 2.41 2
 8 8 -5 79.45 2.68 3
 -7 -8 5 56.44 2.14 2
 7 8 -5 53.33 2.11 3
 7 -8 -5 57.78 2.13 1
 -7 8 5 55.22 1.85 2
 -7 8 5 51.18 1.96 3
 -6 8 5 88.45 2.25 2
 6 -8 -5 85.98 2.58 1
 6 8 -5 89.32 2.61 3
 -6 8 5 85.71 2.47 3
 -6 -8 5 89.46 2.62 2
 -5 8 5 60.16 1.95 3
 -5 8 5 63.79 1.69 2
 5 -8 -5 61.11 2.07 1
 -5 -8 5 61.19 2.03 2
 5 8 -5 59.5 1.97 3
 -5 -8 5 63.3 1.18 1
 -4 8 5 64.46 1.57 2
 4 8 -5 64 1.9 3
 4 -8 -5 64.09 2.01 1
 -4 -8 5 64.35 2 2
 -4 -8 5 61.7 1.32 1
 -4 8 5 63.46 1.94 3
 -3 8 5 69.04 1.95 3
 3 -8 -5 68.2 2.01 1
 -3 -8 5 66.84 1.48 1
 3 8 -5 67.4 1.86 3
 3 8 -5 64.31 1.96 2
 -3 8 5 66.48 1.47 2
 -2 -8 5 139.85 2.62 1
 2 8 -5 138.62 2.79 3
 2 -8 -5 136.86 3.02 1
 2 8 -5 132.71 3.02 2
 -2 8 5 135.98 2.37 2
 1 -8 -5 1.02 0.4 1
 1 8 -5 0.58 0.33 3
 1 -8 -5 0.97 0.24 2
 -1 8 5 0.67 0.41 3
 -1 -8 5 1 0.36 1
 1 8 -5 1.03 0.41 2
 0 8 -5 56.27 1.3 3
 0 8 -5 54.15 1.71 2
 0 -8 -5 54.56 1.6 1
 0 -8 -5 54 1.27 2
 0 -8 5 54.02 1.53 1
 -1 8 -5 103.94 1.87 3
 -1 8 -5 110.17 2.66 2
 -1 -8 -5 107.12 2.45 1
 1 8 5 104.9 2.49 3
 1 -8 5 112.08 2.5 1
 -1 -8 -5 105.81 2.17 2
 -2 -8 -5 235.3 4.32 1
 -2 8 -5 237.79 4.65 2
 -2 -8 -5 231.49 4.14 2
 2 8 5 231.16 4.39 3
 2 -8 5 227.17 4.43 1
 -3 -8 -5 170.5 3.44 2
 3 8 5 172.97 3.58 3
 -3 -8 -5 169.01 3.38 1
 3 -8 5 169.65 3.67 1
 -3 8 -5 167.41 3.77 2
 -4 -8 -5 119.09 2.62 1
 -4 -8 -5 124.99 2.91 2
 -4 8 -5 125.98 3.19 2
 4 8 5 117.84 2.89 3
 4 -8 5 119.88 3.05 1
 5 -8 5 19.27 1.41 1
 5 8 5 20.22 1.24 3
 -5 -8 -5 23.23 0.98 1
 -5 8 -5 20.53 1.33 2
 -5 -8 -5 23.95 1.32 2
 6 -8 5 8.34 1.03 1
 -6 8 -5 7.36 1 2
 -6 -8 -5 7.55 0.96 2
 6 8 5 6.83 0.91 3
 -6 -8 -5 8.49 0.7 1
 -7 -8 -5 56.71 2.24 2
 7 -8 5 53.72 2.29 1
 7 8 5 59.8 2.15 3
 -7 8 -5 58.12 2.38 2
 -8 -8 -5 36.3 1.97 2
 8 -8 5 44.46 2.23 1
 -8 8 -5 43.26 2.18 2
 8 8 5 41.32 1.93 3
 9 -8 5 23.56 1.77 1
 -9 -8 -5 21.72 1.69 2
 -9 8 -5 25.36 1.81 2
 9 8 5 24.87 1.66 3
 -10 8 -5 35.22 2.19 2
 -10 -8 -5 33.53 2.12 2
 10 8 5 38.09 1.98 3
 10 -8 5 33.51 2.21 1
 11 8 5 46.55 2.3 3
 11 -8 5 48.76 2.65 1
 -11 8 -5 45.89 2.63 2
 -11 -8 -5 50.42 2.71 2
 12 -8 5 4.14 1.3 1
 -12 8 -5 7.59 1.47 2
 -12 -8 -5 9.12 1.56 2
 12 8 5 7.08 1.28 3
 -13 8 -5 -1.24 0.91 2
 -13 -8 -5 1.34 1.11 2
 13 9 -5 21.46 2.05 3
 -13 -9 5 18.11 1.9 2
 -12 -9 5 31.96 2.19 2
 12 9 -5 28.24 2.17 3
 12 -9 -5 27.64 1.92 1
 11 -9 -5 72.34 2.82 1
 -11 -9 5 65.27 2.9 2
 11 9 -5 74.02 3.07 3
 -11 9 5 62.09 2.61 2
 10 9 -5 41.15 2.23 3
 10 -9 -5 41.01 2.05 1
 -10 9 5 39.62 2 3
 -10 -9 5 41.92 2.28 2
 -10 9 5 40.73 1.96 2
 -9 9 5 48.92 2.01 2
 9 9 -5 46.14 2.17 3
 -9 9 5 46 2.02 3
 -9 -9 5 41.7 2.11 2
 9 -9 -5 44.29 2.06 1
 8 -9 -5 29.56 1.66 1
 8 9 -5 27.15 1.63 3
 -8 9 5 28.09 1.56 3
 -8 9 5 29.03 1.5 2
 -8 -9 5 24.39 1.6 2
 -7 -9 5 -0.11 0.6 2
 -7 9 5 1.34 0.56 2
 7 -9 -5 0.36 0.63 1
 -7 9 5 0.68 0.57 3
 7 9 -5 1.06 0.62 3
 -6 -9 5 22.43 1.38 2
 6 9 -5 20.98 1.37 3
 -6 9 5 22.91 1.12 2
 6 -9 -5 21.59 1.45 1
 -6 9 5 21.35 1.24 3
 -5 9 5 28.14 1.12 2
 5 9 -5 27.92 1.4 3
 5 -9 -5 27.73 1.46 1
 -5 -9 5 27.51 1.48 2
 -5 9 5 29.15 1.35 3
 -4 9 5 258.38 4.95 3
 4 -9 -5 255.07 5.11 1
 4 9 -5 250.67 4.88 3
 -4 -9 5 267.9 4.2 1
 -4 -9 5 259.04 5.11 2
 -4 9 5 269.2 4.5 2
 -3 9 5 442.78 7.44 3
 3 -9 -5 447.58 7.65 1
 3 9 -5 442.66 7.31 3
 -3 9 5 430.35 6.83 2
 -3 -9 5 444.18 6.89 1
 -2 9 5 316.04 5.65 3
 2 -9 -5 318.3 5.76 1
 -2 -9 5 312.73 5.26 1
 -2 9 5 313.51 5.03 2
 2 9 -5 326.85 5.45 3
 2 9 -5 330.74 5.87 2
 -1 9 5 72.34 2 3
 1 -9 -5 68.51 1.94 1
 -1 -9 5 70.98 1.78 1
 1 9 -5 69.97 2.05 2
 1 -9 -5 70.66 1.51 2
 1 9 -5 72.68 1.74 3
 0 9 -5 -0.07 0.26 3
 0 -9 -5 0.9 0.29 2
 0 9 -5 1.01 0.44 2
 0 -9 5 1.17 0.46 1
 0 -9 -5 0.36 0.37 1
 0 9 5 0.71 0.48 3
 1 -9 5 329.75 5.9 1
 -1 9 -5 329.21 5.13 3
 -1 -9 -5 340.42 5.87 1
 -1 -9 -5 338.19 5.51 2
 -1 9 -5 342.41 6.13 2
 -2 -9 -5 6.89 0.61 2
 2 -9 5 8.33 0.78 1
 -2 -9 -5 6.99 0.64 1
 -2 9 -5 5.28 0.7 2
 -2 9 -5 6.58 0.31 3
 2 9 5 6.6 0.71 3
 -3 -9 -5 76.82 2.07 2
 -3 -9 -5 79.2 2.02 1
 -3 9 -5 77.47 2.37 2
 3 -9 5 79.55 2.31 1
 -4 -9 -5 254.24 4.65 1
 4 9 5 259.97 5.03 3
 -4 9 -5 256.08 5.31 2
 -4 -9 -5 256.39 4.95 2
 4 -9 5 260.97 5.24 1
 -5 9 -5 8.74 1 2
 5 -9 5 9.43 1.04 1
 -5 -9 -5 8.95 0.9 2
 5 9 5 10.66 1.01 3
 -5 -9 -5 9.16 0.73 1
 6 -9 5 30.95 1.75 1
 -6 -9 -5 27.88 1.52 2
 6 9 5 29.61 1.54 3
 -6 9 -5 29.95 1.72 2
 -7 -9 -5 130.29 3.61 2
 7 9 5 134.74 3.48 3
 -7 9 -5 129.07 3.82 2
 7 -9 5 134.67 3.77 1
 8 9 5 5.81 0.93 3
 8 -9 5 4.9 1.03 1
 -8 9 -5 4.91 1 2
 -8 -9 -5 4.83 0.97 2
 9 -9 5 4.07 1.08 1
 9 9 5 4.33 0.92 3
 -9 -9 -5 5.63 1.14 2
 -9 9 -5 3.79 1.02 2
 10 -9 5 8.43 1.31 1
 -10 9 -5 6.85 1.24 2
 10 9 5 7.27 1.18 3
 -10 -9 -5 7.24 1.28 2
 -11 -9 -5 1.05 0.94 2
 11 9 5 1.46 0.97 3
 11 -9 5 1.6 1.11 1
 -11 9 -5 0.62 0.95 2
 12 9 5 3.44 1.15 3
 -12 -9 -5 4.45 1.22 2
 -12 9 -5 4.41 1.29 2
 12 -9 5 5.45 1.37 1
 -13 9 -5 0.45 1.15 2
 -13 -9 -5 1.45 1.11 2
 13 9 5 3.05 1.22 3
 13 10 -5 -1.58 0.99 3
 -13 -10 5 0.09 1.02 2
 12 -10 -5 34.09 2.12 1
 12 10 -5 32.59 2.35 3
 -12 -10 5 24.85 2.12 2
 -11 -10 5 5.64 1.28 2
 11 10 -5 6.99 1.3 3
 11 -10 -5 7.69 1.19 1
 10 10 -5 4.33 1.05 3
 -10 10 5 3.13 0.83 2
 10 -10 -5 4.11 0.98 1
 -10 10 5 3.57 0.93 3
 -10 -10 5 3.8 1.02 2
 -9 -10 5 30.13 1.86 2
 -9 10 5 32.8 1.77 3
 -9 10 5 31.17 1.65 2
 9 10 -5 29.54 1.82 3
 9 -10 -5 33.21 1.91 1
 8 -10 -5 39.4 1.93 1
 -8 10 5 37.8 1.68 2
 -8 -10 5 39.33 1.98 2
 -8 10 5 39.91 1.81 3
 8 10 -5 42.15 2.04 3
 -7 -10 5 4.17 0.87 2
 7 -10 -5 5.57 0.94 1
 -7 10 5 4.65 0.83 3
 -7 10 5 4.95 0.75 2
 7 10 -5 5.12 0.93 3
 6 10 -5 46.12 1.93 3
 -6 10 5 48.07 1.65 2
 -6 -10 5 46.47 1.95 2
 6 -10 -5 45.44 1.95 1
 -6 10 5 45.45 1.82 3
 5 -10 -5 73.76 2.44 1
 5 10 -5 75.96 2.33 3
 -5 10 5 81.41 2.32 3
 -5 -10 5 76.11 2.43 2
 -5 10 5 76.69 2 2
 4 10 -5 85.76 2.38 3
 -4 -10 5 87.9 2.53 2
 -4 -10 5 85.01 1.75 1
 -4 10 5 85 2 2
 4 -10 -5 78.61 2.43 1
 -4 10 5 84.86 2.35 3
 -3 10 5 36.4 1.46 3
 3 -10 -5 36.09 1.54 1
 -3 -10 5 38.9 1.18 1
 -3 10 5 37.17 1.12 2
 3 10 -5 33.62 1.35 3
 2 -10 -5 67.62 2.05 1
 -2 10 5 70.08 2.05 3
 2 10 -5 72.01 1.89 3
 -2 10 5 70.39 1.58 2
 -2 -10 5 74.47 1.81 1
 2 10 -5 70.11 2.14 2
 1 10 -5 86.15 2.4 2
 1 10 -5 84.96 1.99 3
 -1 10 5 85 2.27 3
 -1 -10 5 87.37 2.12 1
 -1 10 5 86.73 1.82 2
 1 -10 -5 87.92 2.31 1
 0 -10 -5 17.48 1 1
 0 10 -5 19.41 0.82 3
 0 10 5 17.87 1.05 3
 0 -10 -5 16.8 0.77 2
 0 10 -5 18.03 1.09 2
 0 -10 5 18.59 1.05 1
 1 -10 5 217.76 4.27 1
 -1 -10 -5 213.53 4.15 1
 -1 10 -5 220.01 4.49 2
 -1 10 -5 214.07 3.53 3
 -1 -10 -5 211.67 3.87 2
 -2 -10 -5 117.98 2.64 2
 2 10 5 117.15 2.87 3
 -2 -10 -5 120.89 2.74 1
 -2 10 -5 125.46 3.1 2
 -2 10 -5 122.02 2.03 3
 2 -10 5 121.71 2.97 1
 -3 -10 -5 119.72 2.69 1
 -3 -10 -5 120.95 2.78 2
 -3 10 -5 113.25 3.08 2
 3 10 5 120.94 2.96 3
 3 -10 5 120.01 3.05 1
 -4 -10 -5 51.2 1.59 1
 -4 10 -5 52 2.03 2
 4 -10 5 52.41 2.03 1
 4 10 5 50.99 1.89 3
 -4 -10 -5 55.01 1.86 2
 5 10 5 0.16 0.62 3
 5 -10 5 0 0.7 1
 -5 10 -5 0.54 0.61 2
 -5 -10 -5 -0.66 0.38 1
 -5 -10 -5 -0.38 0.53 2
 6 -10 5 0.38 0.79 1
 -6 10 -5 0.81 0.62 2
 6 10 5 1.22 0.68 3
 -6 -10 -5 0.62 0.6 2
 -7 -10 -5 2.33 0.85 2
 7 10 5 5.29 0.91 3
 7 -10 5 3.83 0.96 1
 -7 10 -5 3.26 0.89 2
 -8 -10 -5 -0.1 0.65 2
 -8 10 -5 -0.69 0.67 2
 8 10 5 -0.3 0.67 3
 8 -10 5 -0.42 0.8 1
 9 10 5 1.49 0.88 3
 9 -10 5 2.47 0.98 1
 -9 -10 -5 2.05 0.92 2
 -9 10 -5 2.84 1.04 2
 -10 -10 -5 0.32 0.83 2
 10 10 5 0.95 0.9 3
 10 -10 5 0.3 1.02 1
 -10 10 -5 0.13 0.79 2
 -11 -10 -5 23.34 2.02 2
 11 10 5 18.6 1.63 3
 11 -10 5 21.49 1.99 1
 -11 10 -5 19.82 1.91 2
 -12 10 -5 1.08 1.06 2
 12 10 5 1.3 1.05 3
 -12 -10 -5 0.57 1.1 2
 12 -10 5 1.78 1.11 1
 13 11 -5 3.35 1.32 3
 -13 -11 5 2.39 1.22 2
 13 -11 -5 2.98 1.06 1
 12 -11 -5 52.27 2.57 1
 12 11 -5 50.28 2.74 3
 -12 -11 5 52.39 2.8 2
 11 -11 -5 0.98 0.83 1
 -11 -11 5 0.29 0.86 2
 11 11 -5 0.58 0.9 3
 -10 -11 5 15.09 1.58 2
 10 11 -5 14.22 1.45 3
 10 -11 -5 13.83 1.41 1
 -9 -11 5 69.21 2.81 2
 9 11 -5 73.67 2.83 3
 9 -11 -5 77.34 2.86 1
 -9 11 5 74.99 2.61 3
 -9 11 5 74.45 2.54 2
 8 11 -5 15.23 1.4 3
 -8 11 5 13.37 1.18 3
 8 -11 -5 14.31 1.38 1
 -8 11 5 13.7 1.13 2
 -8 -11 5 13.85 1.32 2
 7 11 -5 52.86 2.2 3
 -7 -11 5 52.35 2.22 2
 7 -11 -5 49.37 2.16 1
 -7 11 5 50.14 1.98 3
 -7 11 5 53.67 1.89 2
 6 -11 -5 35.52 1.8 1
 6 11 -5 37.38 1.79 3
 -6 11 5 36.03 1.65 3
 -6 11 5 38.65 1.52 2
 -6 -11 5 37.98 1.82 2
 5 -11 -5 16.63 1.3 1
 5 11 -5 16.63 1.18 3
 -5 11 5 18.3 1 2
 -5 -11 5 17.94 1.29 2
 -5 11 5 18.24 1.21 3
 -4 11 5 106.93 2.37 2
 4 11 -5 108.19 2.78 3
 -4 -11 5 105.04 2.91 2
 -4 -11 5 106.58 2.11 1
 -4 11 5 106.13 2.74 3
 4 -11 -5 99.7 2.87 1
 -3 11 5 214.62 4.33 3
 3 11 -5 213.28 4.22 3
 -3 11 5 220.23 3.84 2
 3 -11 -5 207.18 4.49 1
 -3 -11 5 219.01 3.83 1
 -2 -11 5 99.5 2.24 1
 2 11 -5 92.41 2.29 3
 2 -11 -5 95.96 2.57 1
 -2 11 5 97.06 2.52 3
 2 11 -5 94.97 2.64 2
 -2 11 5 94.23 2.02 2
 -1 -11 5 29.15 1.24 1
 -1 11 5 27.25 1.3 3
 1 11 -5 29.2 1.43 2
 1 -11 -5 27.57 1.32 1
 1 11 -5 28.52 1.12 3
 -1 11 5 29.52 0.99 2
 0 -11 -5 55.85 1.51 2
 0 -11 -5 57.57 1.82 1
 0 -11 5 56.57 1.79 1
 0 11 -5 60.15 1.51 3
 0 11 5 60.68 1.94 3
 -1 11 -5 85.83 1.76 3
 -1 11 -5 82.91 2.46 2
 1 11 5 83.84 2.35 3
 1 -11 5 85.45 2.37 1
 -1 -11 -5 81.74 2.02 2
 -1 -11 -5 85.99 2.24 1
 2 11 5 22.9 1.27 3
 -2 -11 -5 22.23 1.08 2
 -2 11 -5 23.54 0.7 3
 -2 -11 -5 23.55 1.12 1
 2 -11 5 24.35 1.34 1
 -2 11 -5 25.46 1.35 2
 3 11 5 35.06 1.57 3
 -3 11 -5 32.13 1.63 2
 -3 -11 -5 35.45 1.35 1
 3 -11 5 33.77 1.65 1
 -3 -11 -5 32.27 1.39 2
 4 -11 5 11.19 1.13 1
 -4 11 -5 11.06 1.07 2
 -4 -11 -5 10.41 0.81 1
 -4 -11 -5 10.66 0.96 2
 4 11 5 10.55 0.99 3
 -5 -11 -5 34.76 1.62 2
 -5 11 -5 32.38 1.73 2
 5 -11 5 34.47 1.85 1
 -5 -11 -5 32.84 1.28 1
 5 11 5 33.35 1.71 3
 -6 -11 -5 5.76 0.91 2
 6 -11 5 5.08 1.03 1
 -6 11 -5 5.82 1.02 2
 6 11 5 6.81 0.96 3
 7 -11 5 8.06 1.19 1
 -7 -11 -5 10 1.15 2
 -7 11 -5 9.05 1.19 2
 7 11 5 10.57 1.14 3
 -8 -11 -5 0.82 0.74 2
 -8 11 -5 0.22 0.7 2
 8 11 5 1.35 0.78 3
 8 -11 5 0.7 0.89 1
 -9 -11 -5 -1.66 0.71 2
 9 11 5 0.27 0.81 3
 9 -11 5 0.03 0.97 1
 -9 11 -5 -0.43 0.69 2
 10 11 5 15.66 1.48 3
 -10 11 -5 16.99 1.71 2
 -10 -11 -5 14.89 1.68 2
 10 -11 5 12.39 1.63 1
 -11 11 -5 8.13 1.5 2
 -11 -11 -5 10.09 1.53 2
 11 11 5 12.18 1.49 3
 11 -11 5 11.94 1.61 1
 -12 11 -5 -0.41 0.93 2
 -12 -11 -5 -0.8 0.91 2
 12 11 5 0.74 1.01 3
 12 -11 5 -0.37 1.15 1
 -13 -12 5 24.71 2.2 2
 13 12 -5 25.3 2.26 3
 13 -12 -5 25.57 2.05 1
 12 12 -5 0.46 0.98 3
 -12 -12 5 1.45 1.09 2
 12 -12 -5 1.86 0.99 1
 -11 -12 5 52.18 2.79 2
 11 -12 -5 57.58 2.67 1
 11 12 -5 50.31 2.61 3
 10 12 -5 -0.91 0.69 3
 10 -12 -5 0.35 0.77 1
 -10 -12 5 0.2 0.79 2
 -9 12 5 27.04 1.65 3
 -9 -12 5 26.41 1.84 2
 9 -12 -5 30.66 1.95 1
 9 12 -5 26.81 1.78 3
 -8 12 5 107.45 3.01 2
 8 -12 -5 102.62 3.34 1
 -8 12 5 107.68 3.1 3
 8 12 -5 101.94 3.3 3
 -8 -12 5 104.6 3.38 2
 -7 12 5 2.71 0.8 3
 -7 12 5 1.22 0.65 2
 7 -12 -5 1.71 0.77 1
 7 12 -5 1.64 0.74 3
 -7 -12 5 2.04 0.84 2
 -6 12 5 153.15 3.39 2
 -6 -12 5 139.83 3.8 2
 6 12 -5 143.44 3.7 3
 6 -12 -5 146.69 3.9 1
 -6 12 5 153.94 3.62 3
 -5 -12 5 135.48 3.58 2
 -5 12 5 143.27 3.06 2
 -5 12 5 137.78 3.34 3
 5 12 -5 131.19 3.37 3
 5 -12 -5 130.42 3.57 1
 -4 -12 5 67.54 1.6 1
 4 12 -5 65.08 2.14 3
 -4 -12 5 64.22 2.27 2
 -4 12 5 63.82 1.77 2
 4 -12 -5 64.98 2.29 1
 -4 12 5 65.79 2.11 3
 3 -12 -5 26.33 1.48 1
 -3 -12 5 28.28 1.15 1
 -3 12 5 23.18 1.27 3
 3 12 -5 25.44 1.29 3
 3 12 -5 26.67 1.44 2
 -3 12 5 25.42 1.01 2
 2 12 -5 18.79 1.05 3
 -2 -12 5 20.19 1.05 1
 2 12 -5 20.28 1.25 2
 -2 12 5 18.53 1.18 3
 -2 12 5 20.09 0.89 2
 2 -12 -5 21.08 1.23 1
 1 -12 -5 68.57 2.14 1
 1 12 -5 73.73 2.33 2
 -1 12 5 71.23 2.16 3
 1 12 -5 78 1.94 3
 -1 12 5 76.19 1.8 2
 -1 -12 5 75.35 2.07 1
 0 12 5 17.58 1.12 3
 0 -12 -5 16.48 0.86 2
 0 12 -5 16.3 0.85 3
 0 12 -5 14.57 1.09 2
 0 -12 5 17.29 1.11 1
 0 -12 -5 17.11 1.05 1
 -1 -12 -5 7.54 0.73 1
 -1 -12 -5 9.08 0.73 2
 1 -12 5 8.8 0.94 1
 1 12 5 8.1 0.9 3
 -1 12 -5 9.69 0.96 2
 -1 12 -5 7.94 0.59 3
 2 12 5 75.03 2.34 3
 -2 -12 -5 77.13 2.1 2
 2 -12 5 80.85 2.45 1
 -2 12 -5 75.82 1.57 3
 -2 12 -5 77.43 2.47 2
 -2 -12 -5 80.76 2.2 1
 3 12 5 94.95 2.74 3
 -3 -12 -5 96.65 2.42 1
 -3 -12 -5 90.45 2.45 2
 -3 12 -5 89.66 2.8 2
 3 -12 5 100.28 2.93 1
 -4 -12 -5 13.92 1.05 2
 -4 12 -5 13.37 1.23 2
 4 12 5 11.58 1.08 3
 4 -12 5 13.43 1.24 1
 -4 -12 -5 12.74 0.91 1
 -5 -12 -5 230.17 4.87 2
 5 -12 5 224.45 5.21 1
 5 12 5 224.57 4.92 3
 -5 12 -5 224.11 5.19 2
 6 -12 5 0.3 0.78 1
 6 12 5 0.18 0.69 3
 -6 -12 -5 -0.39 0.63 2
 -6 12 -5 0.15 0.71 2
 7 -12 5 43.81 2.3 1
 -7 12 -5 45.65 2.31 2
 7 12 5 49.67 2.23 3
 -7 -12 -5 50.13 2.22 2
 8 -12 5 19.74 1.73 1
 8 12 5 24.13 1.66 3
 -8 12 -5 26.55 1.85 2
 -8 -12 -5 25.51 1.74 2
 9 -12 5 8.02 1.32 1
 -9 12 -5 8.87 1.33 2
 9 12 5 8 1.19 3
 -9 -12 -5 9.94 1.35 2
 10 12 5 13.75 1.47 3
 -10 -12 -5 14.84 1.64 2
 -10 12 -5 15.32 1.73 2
 10 -12 5 14.41 1.65 1
 11 12 5 3.22 1.11 3
 11 -12 5 0.26 1.03 1
 -11 12 -5 3.09 1.14 2
 -11 -12 -5 2.57 1.12 2
 -12 12 -5 3.84 1.27 2
 12 12 5 4.08 1.21 3
 -12 -12 -5 6.69 1.48 2
 12 -12 5 4.18 1.45 1
 13 13 -5 12.27 1.8 3
 -13 -13 5 12.81 1.81 2
 13 -13 -5 15.23 1.73 1
 -12 -13 5 19.16 1.92 2
 12 13 -5 23.83 2.09 3
 12 -13 -5 19.02 1.78 1
 11 -13 -5 2.51 1.08 1
 -11 -13 5 3.63 1.17 2
 11 13 -5 2.66 1.07 3
 10 13 -5 46.79 2.41 3
 -10 -13 5 44.06 2.49 2
 10 -13 -5 46.37 2.46 1
 9 13 -5 26.99 1.82 3
 -9 -13 5 25.59 1.84 2
 9 -13 -5 24.71 1.79 1
 8 13 -5 2.68 0.93 3
 -8 13 5 1.57 0.8 3
 8 -13 -5 1.59 0.87 1
 -8 -13 5 3.07 0.95 2
 -7 -13 5 4.36 0.95 2
 7 -13 -5 4.99 0.98 1
 7 13 -5 3.97 0.88 3
 -7 13 5 5.16 0.89 3
 -6 13 5 36.57 1.72 3
 6 -13 -5 37.98 1.99 1
 -6 13 5 40.39 1.62 2
 6 13 -5 38.13 1.83 3
 -6 -13 5 33.74 1.86 2
 5 -13 -5 42.47 2.05 1
 -5 -13 5 45.57 2.02 2
 -5 13 5 48.22 1.89 3
 -5 13 5 45.23 1.61 2
 5 13 -5 45.65 1.9 3
 -4 13 5 130.03 2.84 2
 4 -13 -5 130.67 3.47 1
 4 13 -5 125.72 3.21 3
 -4 13 5 129.08 3.24 3
 -4 -13 5 128.88 3.46 2
 3 -13 -5 61.42 2.22 1
 -3 13 5 59 2.04 3
 3 13 -5 57.29 2.15 2
 -3 -13 5 63.14 1.73 1
 -3 13 5 60.69 1.68 2
 3 13 -5 58.18 1.96 3
 -2 13 5 1.57 0.42 2
 -2 -13 5 3.07 0.61 1
 2 13 -5 3.14 0.72 2
 2 13 -5 1.67 0.54 3
 2 -13 -5 1.95 0.65 1
 -2 13 5 2.38 0.69 3
 -1 13 5 155.99 3.11 2
 -1 -13 5 156.56 3.46 1
 -1 13 5 165.56 3.67 3
 1 13 -5 153.36 3.22 3
 1 13 -5 155.84 3.78 2
 1 -13 -5 165.67 3.69 1
 0 13 -5 63.47 1.7 3
 0 13 5 60.86 2.06 3
 0 -13 5 60.7 2.06 1
 0 -13 -5 67.37 2.06 1
 0 -13 -5 65.51 1.77 2
 0 13 -5 64.03 2.22 2
 1 13 5 57.54 2.01 3
 1 -13 5 57.96 2.1 1
 -1 -13 -5 57.19 1.87 1
 -1 13 -5 58.6 2.18 2
 -1 -13 -5 56.22 1.72 2
 -1 13 -5 60.83 1.52 3
 -2 -13 -5 127.08 2.95 2
 -2 -13 -5 131.39 3.02 1
 2 -13 5 124.26 3.31 1
 -2 13 -5 122.97 3.38 2
 2 13 5 125.26 3.22 3
 -3 -13 -5 27.43 1.29 1
 -3 13 -5 25.9 1.54 2
 3 -13 5 26.23 1.61 1
 3 13 5 28.85 1.63 3
 -3 -13 -5 26.05 1.34 2
 -4 -13 -5 156.52 3.65 2
 4 13 5 145 3.74 3
 4 -13 5 149.79 3.99 1
 -4 -13 -5 157.59 3.34 1
 -4 13 -5 152.58 4.01 2
 -5 13 -5 4.98 0.96 2
 5 13 5 4.84 0.94 3
 -5 -13 -5 5.21 0.88 2
 5 -13 5 4.24 0.98 1
 6 13 5 94.57 3.05 3
 6 -13 5 89.62 3.2 1
 -6 -13 -5 94.56 2.99 2
 -6 13 -5 88.63 3.1 2
 7 -13 5 0.81 0.87 1
 -7 13 -5 1.98 0.83 2
 7 13 5 1.93 0.87 3
 -7 -13 -5 0.31 0.73 2
 -8 -13 -5 4.89 1.04 2
 8 -13 5 2.81 1.07 1
 8 13 5 3.9 0.98 3
 -8 13 -5 4.51 1.09 2
 9 -13 5 4.5 1.21 1
 9 13 5 5.43 1.16 3
 -9 -13 -5 6.64 1.19 2
 -9 13 -5 4.83 1.16 2
 -10 -13 -5 0.12 0.95 2
 -10 13 -5 1.92 0.98 2
 10 -13 5 1.31 1.09 1
 10 13 5 1.23 1 3
 -11 -13 -5 0.8 1.06 2
 11 13 5 3.17 1.15 3
 11 -13 5 -0.3 1.12 1
 -11 13 -5 0.26 0.94 2
 12 -13 5 2.21 1.36 1
 -12 13 -5 1.68 1.1 2
 -12 -13 -5 1.22 1.22 2
 12 13 5 2.98 1.15 3
 12 -14 -5 14.27 1.66 1
 12 14 -5 15 1.77 3
 -12 -14 5 12.23 1.74 2
 11 -14 -5 5.03 1.23 1
 -11 -14 5 5 1.31 2
 11 14 -5 3.75 1.19 3
 10 -14 -5 6.93 1.27 1
 -10 -14 5 5.65 1.2 2
 10 14 -5 6.27 1.25 3
 9 14 -5 -0.7 0.68 3
 9 -14 -5 1.92 0.9 1
 -9 -14 5 -1.04 0.68 2
 8 14 -5 -0.71 0.61 3
 -8 -14 5 0.94 0.76 2
 8 -14 -5 -0.58 0.7 1
 -8 14 5 -0.04 0.71 3
 -7 -14 5 20.57 1.58 2
 -7 14 5 23.18 1.53 3
 7 -14 -5 19.27 1.56 1
 7 14 -5 22.13 1.61 3
 -6 14 5 25.92 1.5 3
 6 14 -5 25.85 1.66 3
 -6 -14 5 25.59 1.71 2
 6 -14 -5 24.78 1.64 1
 -5 14 5 190.86 3.89 2
 -5 14 5 179.38 4.14 3
 -5 -14 5 186.41 4.57 2
 5 -14 -5 180.63 4.52 1
 5 14 -5 178.77 4.26 3
 4 14 -5 242.45 5.02 3
 4 -14 -5 240.29 5.3 1
 -4 -14 5 249.08 5.39 2
 -4 14 5 245.26 4.98 3
 -4 14 5 239.34 4.58 2
 -3 14 5 60.34 2.06 3
 -3 14 5 57 1.71 2
 3 14 -5 59.48 2.02 3
 -3 -14 5 62.07 1.8 1
 3 14 -5 61.76 2.29 2
 3 -14 -5 56.04 2.16 1
 2 14 -5 103.14 3.03 2
 2 -14 -5 107.41 2.98 1
 -2 14 5 108.2 2.46 2
 -2 -14 5 110.68 2.68 1
 2 14 -5 104.87 2.67 3
 -2 14 5 111.7 2.91 3
 -1 14 5 1.99 0.71 3
 1 14 -5 2.3 0.7 2
 -1 -14 5 1.49 0.72 1
 1 -14 -5 2.3 0.63 1
 1 14 -5 2.36 0.56 3
 -1 14 5 1.82 0.47 2
 0 14 5 72.48 2.35 3
 0 -14 5 74.55 2.33 1
 0 -14 -5 71.83 1.96 2
 0 14 -5 71.95 1.9 3
 0 14 -5 70.93 2.46 2
 0 -14 -5 69.58 2.18 1
 -1 -14 -5 6.24 0.76 1
 -1 -14 -5 7.36 0.73 2
 -1 14 -5 7.07 0.63 3
 1 -14 5 4.98 0.88 1
 -1 14 -5 6.32 0.92 2
 1 14 5 6.77 0.93 3
 -2 -14 -5 2.22 0.56 1
 -2 -14 -5 2.36 0.61 2
 2 14 5 1.41 0.76 3
 -2 14 -5 2.86 0.76 2
 2 -14 5 1.71 0.86 1
 -3 -14 -5 24.01 1.25 1
 -3 -14 -5 23.95 1.32 2
 3 -14 5 21.57 1.54 1
 3 14 5 22.13 1.45 3
 -3 14 -5 23.38 1.51 2
 4 14 5 21.82 1.54 3
 -4 -14 -5 19.76 1.33 2
 4 -14 5 18.93 1.57 1
 -4 14 -5 17.72 1.41 2
 -5 14 -5 27.29 1.72 2
 -5 -14 -5 26.74 1.59 2
 5 14 5 27.93 1.75 3
 5 -14 5 25.56 1.8 1
 6 -14 5 2.09 0.94 1
 -6 -14 -5 4.55 0.99 2
 -6 14 -5 3.74 0.97 2
 6 14 5 4.61 0.98 3
 -7 -14 -5 32.4 1.86 2
 7 -14 5 29.38 2.05 1
 7 14 5 32.34 1.9 3
 -7 14 -5 29.05 1.98 2
 -8 14 -5 6.74 1.21 2
 8 -14 5 6.13 1.32 1
 8 14 5 6.46 1.11 3
 -8 -14 -5 7.11 1.2 2
 9 -14 5 8.56 1.47 1
 -9 -14 -5 7.31 1.29 2
 9 14 5 7.1 1.2 3
 -9 14 -5 7.27 1.32 2
 10 14 5 3.38 1.15 3
 -10 -14 -5 1.08 0.98 2
 10 -14 5 2.04 1.18 1
 -10 14 -5 1.96 1.06 2
 11 14 5 4.3 1.2 3
 -11 14 -5 5.32 1.46 2
 11 -14 5 5.92 1.52 1
 -11 -14 -5 5.65 1.45 2
 12 -15 -5 -0.8 0.82 1
 -12 -15 5 0.04 1.01 2
 12 15 -5 0.18 0.96 3
 11 -15 -5 27.1 2.06 1
 -11 -15 5 24.27 2.06 2
 11 15 -5 26.97 2.09 3
 -10 -15 5 -0.25 0.85 2
 10 -15 -5 0.05 0.87 1
 10 15 -5 0.59 0.92 3
 9 15 -5 0.96 0.82 3
 -9 -15 5 0.92 0.85 2
 9 -15 -5 1.51 0.93 1
 8 -15 -5 0.8 0.8 1
 -8 -15 5 0.58 0.75 2
 8 15 -5 -1.63 0.59 3
 7 15 -5 -0.8 0.68 3
 -7 -15 5 -0.69 0.73 2
 -7 15 5 -0.33 0.69 3
 7 -15 -5 0.36 0.73 1
 6 -15 -5 0.34 0.7 1
 6 15 -5 -0.45 0.66 3
 -6 -15 5 0.04 0.69 2
 -6 15 5 1.17 0.73 3
 -5 -15 5 5.83 1 2
 5 -15 -5 5.88 0.99 1
 5 15 -5 5.24 0.94 3
 -5 15 5 7.15 0.97 3
 -4 15 5 27.55 1.28 2
 -4 15 5 26.77 1.51 3
 -4 -15 5 28.65 1.72 2
 4 15 -5 28.92 1.54 3
 4 -15 -5 23.57 1.56 1
 3 -15 -5 135.32 3.6 1
 -3 15 5 136.3 3.39 3
 -3 15 5 138.17 3.01 2
 3 15 -5 129.56 3.64 2
 -3 -15 5 134.03 2.95 1
 3 15 -5 136.62 3.31 3
 2 15 -5 68.48 2.49 2
 -2 15 5 72.74 2.33 3
 2 -15 -5 71.7 2.41 1
 -2 15 5 69.26 1.95 2
 2 15 -5 72.57 2.19 3
 -2 -15 5 72.84 2.17 1
 1 15 -5 94.53 2.9 2
 1 -15 -5 90.19 2.67 1
 -1 15 5 87.66 2.25 2
 1 -15 -5 89.83 2.29 2
 -1 15 5 95.17 2.75 3
 1 15 -5 90.54 2.37 3
 -1 -15 5 93.37 2.61 1
 0 -15 -5 2.9 0.68 1
 0 15 5 2.1 0.73 3
 0 15 -5 1.34 0.66 2
 0 -15 5 2.22 0.79 1
 0 15 -5 4.58 0.63 3
 0 -15 -5 2.11 0.54 2
 1 -15 5 99.44 2.97 1
 -1 -15 -5 97.11 2.51 2
 -1 15 -5 93.7 2.99 2
 -1 -15 -5 95.98 2.64 1
 1 15 5 99.21 2.87 3
 -2 -15 -5 49.84 1.81 2
 -2 15 -5 52.03 2.17 2
 2 15 5 51.82 2.07 3
 2 -15 5 48.96 2.14 1
 -2 -15 -5 50.97 1.83 1
 -3 -15 -5 0.97 0.63 2
 3 -15 5 1.51 0.82 1
 3 15 5 -0.46 0.67 3
 -3 -15 -5 0.54 0.54 1
 -3 15 -5 0.19 0.63 2
 -4 -15 -5 39.2 1.79 2
 -4 15 -5 39.36 2 2
 4 -15 5 36.79 2.04 1
 4 15 5 36.96 1.88 3
 -5 -15 -5 1.7 0.75 2
 -5 15 -5 2.22 0.9 2
 5 15 5 1.84 0.83 3
 5 -15 5 1.08 0.83 1
 6 15 5 80.24 2.87 3
 -6 15 -5 75.53 2.96 2
 -6 -15 -5 83.13 2.83 2
 6 -15 5 74.73 3.04 1
 7 15 5 0.26 0.82 3
 -7 -15 -5 -0.34 0.7 2
 7 -15 5 0.68 0.96 1
 -7 15 -5 -0.2 0.71 2
 -8 15 -5 41.42 2.35 2
 -8 -15 -5 37.89 2.22 2
 8 15 5 43.12 2.24 3
 8 -15 5 40.4 2.52 1
 -9 -15 -5 -0.37 0.8 2
 -9 15 -5 -0.43 0.89 2
 9 15 5 1.82 1.05 3
 9 -15 5 0.29 1.05 1
 10 -15 5 42.29 2.66 1
 10 15 5 42.09 2.43 3
 -10 15 -5 45.64 2.74 2
 -10 -15 -5 41.66 2.52 2
 11 15 5 12.68 1.61 3
 -11 15 -5 16.97 1.93 2
 11 -15 5 12.16 1.83 1
 -11 -15 -5 18.06 1.98 2
 -12 -16 5 6.74 1.55 2
 12 16 -5 6.43 1.46 3
 12 -16 -5 4.13 1.2 1
 -11 -16 5 20.02 1.97 2
 11 16 -5 21.29 1.96 3
 11 -16 -5 27.99 2.13 1
 -10 -16 5 -0.3 0.84 2
 10 -16 -5 0.61 0.87 1
 10 16 -5 1.74 0.94 3
 9 -16 -5 8.08 1.34 1
 -9 -16 5 4.05 1.1 2
 9 16 -5 7.07 1.27 3
 -8 -16 5 20.52 1.74 2
 8 16 -5 21.55 1.75 3
 8 -16 -5 23.43 1.81 1
 7 -16 -5 4.09 1.02 1
 -7 -16 5 2.33 0.91 2
 7 16 -5 4.4 0.96 3
 -6 -16 5 10.23 1.28 2
 -6 16 5 9.78 1.09 3
 6 16 -5 9.2 1.12 3
 6 -16 -5 10.73 1.33 1
 5 16 -5 7.47 1.05 3
 -5 -16 5 7.7 1.12 2
 -5 16 5 6.86 1.01 3
 5 -16 -5 6.51 1.06 1
 4 -16 -5 50.23 2.21 1
 -4 -16 5 54.22 2.3 2
 -4 16 5 53.09 2.08 3
 4 16 -5 51.1 2.08 3
 3 16 -5 14.58 1.3 2
 3 -16 -5 12.8 1.2 1
 3 16 -5 13.39 1.11 3
 -3 16 5 13.72 0.98 2
 -3 16 5 13.96 1.17 3
 -2 16 5 10.47 0.87 2
 2 16 -5 10.92 1.16 2
 2 16 -5 10.52 1 3
 2 -16 -5 8.53 1.03 1
 -2 -16 5 9.89 0.99 1
 -2 16 5 11.88 1.13 3
 1 -16 -5 7.44 0.97 1
 1 16 -5 9.73 1.09 2
 1 16 -5 8.8 0.86 3
 -1 -16 5 8.22 1.02 1
 1 -16 -5 8.97 0.79 2
 -1 16 5 10 1.04 3
 0 -16 -5 3.46 0.72 1
 0 16 -5 3.48 0.85 2
 0 -16 -5 2.9 0.6 2
 0 16 -5 2.22 0.61 3
 0 -16 5 2.46 0.82 1
 0 16 5 2.81 0.82 3
 1 -16 5 5.62 0.94 1
 -1 -16 -5 5.32 0.78 1
 -1 -16 -5 4.52 0.71 2
 1 16 5 3.23 0.9 3
 -1 16 -5 4.26 0.89 2
 2 -16 5 143.95 3.89 1
 -2 -16 -5 143.36 3.45 1
 -2 16 -5 147.76 4 2
 2 16 5 146.55 3.78 3
 -2 -16 -5 147.72 3.45 2
 -3 16 -5 128.14 3.73 2
 -3 -16 -5 133.34 3.21 1
 3 16 5 129.3 3.6 3
 -3 -16 -5 131.42 3.32 2
 3 -16 5 112.34 3.56 1
 4 -16 5 14.59 1.44 1
 -4 16 -5 18.64 1.56 2
 -4 -16 -5 13.46 1.2 2
 4 16 5 14.08 1.39 3
 5 16 5 17.82 1.47 3
 -5 -16 -5 21.1 1.45 2
 -5 16 -5 20.51 1.61 2
 5 -16 5 18.37 1.63 1
 6 -16 5 5.41 1.18 1
 6 16 5 5.22 1.1 3
 -6 16 -5 7.9 1.22 2
 -6 -16 -5 5.68 1.01 2
 -7 16 -5 10.34 1.43 2
 7 16 5 10 1.31 3
 -7 -16 -5 8.33 1.26 2
 7 -16 5 10.05 1.42 1
 -8 -16 -5 0.83 0.82 2
 -8 16 -5 0.29 0.85 2
 8 16 5 1.26 0.9 3
 8 -16 5 0.94 1.1 1
 -9 16 -5 11.03 1.61 2
 9 16 5 9.12 1.42 3
 -9 -16 -5 10.43 1.49 2
 9 -16 5 11.11 1.71 1
 10 16 5 1.61 1.11 3
 -10 -16 -5 1.47 1.12 2
 10 -16 5 1.18 1.24 1
 -10 16 -5 0.21 0.98 2
 -11 -16 -5 29.46 2.27 2
 11 16 5 28.84 2.29 3
 -11 16 -5 21.48 2.13 2
 11 -16 5 21.15 2.2 1
 -11 -17 5 6.06 1.43 2
 11 17 -5 6.03 1.35 3
 11 -17 -5 8.12 1.5 1
 10 17 -5 17.84 1.73 3
 -10 -17 5 16.4 1.81 2
 10 -17 -5 14.01 1.63 1
 9 17 -5 0.29 0.81 3
 9 -17 -5 0.2 0.81 1
 -9 -17 5 1.2 0.96 2
 8 17 -5 70.21 2.94 3
 8 -17 -5 65.88 2.94 1
 -8 -17 5 73.36 3.09 2
 7 -17 -5 20.98 1.7 1
 7 17 -5 19.49 1.57 3
 -7 -17 5 18.97 1.73 2
 -6 -17 5 -0.18 0.66 2
 6 17 -5 0.15 0.69 3
 6 -17 -5 -0.11 0.77 1
 -6 17 5 0.1 0.72 3
 -5 -17 5 65.23 2.69 2
 5 17 -5 63.82 2.48 3
 5 -17 -5 62.96 2.61 1
 -5 17 5 65.62 2.38 3
 -4 -17 5 38.35 2.03 2
 4 17 -5 41.6 1.88 3
 -4 17 5 38.07 1.84 3
 4 -17 -5 42.66 2.1 1
 3 17 -5 9.03 1.18 2
 3 17 -5 8.42 0.99 3
 3 -17 -5 8.66 1.05 1
 -3 17 5 8.95 1.06 3
 -2 -17 5 15.68 1.22 1
 2 17 -5 14.8 1.33 2
 2 17 -5 17.68 1.23 3
 2 -17 -5 17.63 1.39 1
 -2 17 5 17.21 1.3 3
 1 -17 -5 2.73 0.77 1
 1 -17 -5 2.84 0.62 2
 1 17 -5 3.28 0.83 2
 1 17 -5 3.05 0.69 3
 -1 -17 5 3.29 0.83 1
 -1 17 5 2.98 0.86 3
 0 17 -5 0.15 0.52 3
 0 -17 -5 -0.26 0.51 1
 0 -17 -5 0.28 0.48 2
 0 17 -5 -0.25 0.64 2
 0 -17 5 -0.21 0.68 1
 0 17 5 -0.05 0.66 3
 1 17 5 22.94 1.6 3
 -1 -17 -5 21.95 1.33 1
 -1 -17 -5 23.9 1.33 2
 -1 17 -5 17.67 1.44 2
 1 -17 5 22.09 1.62 1
 2 17 5 -0.2 0.75 3
 -2 17 -5 -1.01 0.61 2
 -2 -17 -5 -0.4 0.51 2
 2 -17 5 0.06 0.77 1
 -2 -17 -5 0.79 0.57 1
 -3 17 -5 12.67 1.4 2
 3 17 5 14.58 1.33 3
 3 -17 5 12.79 1.36 1
 -3 -17 -5 15.67 1.26 2
 -4 -17 -5 18.74 1.41 2
 4 17 5 20.31 1.59 3
 -4 17 -5 21.08 1.61 2
 4 -17 5 19.24 1.68 1
 -5 17 -5 35.59 2.07 2
 5 17 5 33.94 1.96 3
 -5 -17 -5 40.88 1.99 2
 5 -17 5 36.1 2.18 1
 6 -17 5 25.16 1.95 1
 -6 -17 -5 21.95 1.67 2
 6 17 5 28.21 1.83 3
 -6 17 -5 25.22 1.92 2
 7 -17 5 10.4 1.5 1
 -7 -17 -5 11.99 1.38 2
 7 17 5 13.41 1.48 3
 -7 17 -5 14.48 1.58 2
 -8 17 -5 18.16 1.75 2
 8 17 5 21.49 1.79 3
 -8 -17 -5 22.75 1.86 2
 8 -17 5 19.06 1.86 1
 -9 -17 -5 2.2 1.06 2
 9 -17 5 2.15 1.24 1
 -9 17 -5 1.31 1.02 2
 9 17 5 2.67 1.14 3
 10 17 5 4.84 1.31 3
 -10 17 -5 4.95 1.43 2
 -10 -17 -5 7.81 1.44 2
 10 -17 5 5.86 1.56 1
 11 18 -5 3.67 1.22 3
 -11 -18 5 4.52 1.43 2
 11 -18 -5 6.62 1.36 1
 10 18 -5 1.81 1.01 3
 10 -18 -5 3.32 1.17 1
 -10 -18 5 0.97 1 2
 -9 -18 5 26.2 2.13 2
 9 -18 -5 24.52 1.99 1
 9 18 -5 25.7 2.04 3
 -8 -18 5 24.16 1.95 2
 8 -18 -5 29.09 2.06 1
 8 18 -5 26.68 1.91 3
 7 -18 -5 10.73 1.38 1
 -7 -18 5 12.08 1.46 2
 7 18 -5 12.45 1.42 3
 -6 -18 5 27.73 1.91 2
 6 -18 -5 31.59 2.04 1
 6 18 -5 27.53 1.83 3
 -5 18 5 5.1 0.96 3
 -5 -18 5 7.58 1.17 2
 5 -18 -5 5.82 1.06 1
 5 18 -5 6.06 0.99 3
 -4 18 5 43.33 1.97 3
 4 -18 -5 35.96 2.05 1
 4 18 -5 44.86 2.03 3
 -4 -18 5 41.46 2.15 2
 -3 -18 5 25.14 1.71 2
 -3 18 5 23.26 1.54 3
 3 18 -5 23.77 1.66 2
 3 -18 -5 25.67 1.63 1
 3 18 -5 21.97 1.43 3
 2 18 -5 8.65 1 3
 2 18 -5 11.96 1.28 2
 -2 18 5 11.37 1.14 3
 2 -18 -5 9.34 1.07 1
 1 18 -5 72.18 2.27 3
 -1 18 5 74.42 2.61 3
 1 -18 -5 75.81 2.56 1
 1 18 -5 77.48 2.83 2
 -1 -18 5 76.45 2.48 1
 0 18 -5 12.65 1.3 2
 0 18 5 13.14 1.22 3
 0 -18 -5 12.12 1.03 2
 0 -18 -5 15.61 1.23 1
 0 -18 5 12.98 1.26 1
 -1 -18 -5 68.15 2.32 1
 -1 -18 -5 65.55 2.18 2
 -1 18 -5 60.78 2.54 2
 1 18 5 68.67 2.51 3
 1 -18 5 68.81 2.62 1
 2 -18 5 -0.24 0.81 1
 -2 -18 -5 0.64 0.62 2
 -2 -18 -5 0.15 0.56 1
 -2 18 -5 0.01 0.67 2
 2 18 5 -0.29 0.68 3
 3 -18 5 61.41 2.65 1
 -3 18 -5 65.31 2.7 2
 3 18 5 66.03 2.63 3
 -3 -18 -5 69.88 2.41 2
 4 -18 5 4.51 1.1 1
 -4 -18 -5 8.23 1.07 2
 -4 18 -5 6.56 1.18 2
 4 18 5 6.34 1.09 3
 5 18 5 -0.01 0.78 3
 -5 -18 -5 -0.11 0.72 2
 5 -18 5 -0.3 0.95 1
 -5 18 -5 -0.15 0.78 2
 6 -18 5 40.27 2.49 1
 -6 -18 -5 37.98 2.12 2
 -6 18 -5 42.62 2.34 2
 6 18 5 39.91 2.16 3
 7 18 5 0.35 0.81 3
 -7 18 -5 0.25 0.86 2
 -7 -18 -5 -0.82 0.71 2
 7 -18 5 1.49 1.12 1
 -8 18 -5 3.5 1.23 2
 -8 -18 -5 3.99 1.14 2
 8 -18 5 1.83 1.14 1
 8 18 5 3.16 1.12 3
 9 -18 5 10.05 1.62 1
 -9 -18 -5 8.91 1.45 2
 9 18 5 8.66 1.43 3
 -9 18 -5 12.91 1.72 2
 10 -18 5 14.24 1.87 1
 10 18 5 17.92 1.9 3
 -10 18 -5 15.72 1.89 2
 -10 -18 -5 18.14 1.9 2
 10 -19 -5 1.14 0.99 1
 10 19 -5 0.86 1.09 3
 -10 -19 5 -1.59 0.9 2
 9 19 -5 0.9 0.92 3
 -9 -19 5 0.05 0.83 2
 9 -19 -5 -0.79 0.79 1
 8 19 -5 5.55 1.23 3
 -8 -19 5 8.38 1.4 2
 8 -19 -5 6.94 1.28 1
 -7 -19 5 10.79 1.45 2
 7 19 -5 12.49 1.44 3
 7 -19 -5 9.13 1.38 1
 6 19 -5 1.62 0.9 3
 6 -19 -5 0.18 0.75 1
 -6 -19 5 -1.44 0.64 2
 5 -19 -5 2.16 0.95 1
 5 19 -5 2.08 0.82 3
 -5 -19 5 1.2 0.85 2
 -5 19 5 0.66 0.85 3
 -4 19 5 -0.54 0.72 3
 4 -19 -5 -0.01 0.65 1
 -4 -19 5 0.58 0.73 2
 4 19 -5 0.75 0.67 3
 -3 19 5 20.75 1.51 3
 3 -19 -5 21.8 1.54 1
 3 19 -5 22.7 1.48 3
 -3 -19 5 21.17 1.64 2
 2 19 -5 26.95 1.51 3
 2 -19 -5 29.45 1.69 1
 -2 19 5 28.75 1.68 3
 2 19 -5 28.87 1.83 2
 1 19 -5 2.22 0.83 2
 -1 19 5 1.93 0.87 3
 1 19 -5 1.83 0.67 3
 1 -19 -5 1.23 0.71 1
 -1 -19 5 0.61 0.74 1
 0 -19 -5 23.31 1.46 1
 0 -19 5 22.74 1.59 1
 0 19 5 22.67 1.66 3
 0 19 -5 21.18 1.62 2
 -1 -19 -5 4.6 0.83 1
 -1 19 -5 3.55 1.01 2
 1 -19 5 4.34 1.05 1
 -1 -19 -5 3.1 0.78 2
 1 19 5 3.28 0.96 3
 -2 19 -5 43.94 2.24 2
 2 19 5 43.52 2.22 3
 -2 -19 -5 45.7 1.93 2
 2 -19 5 43.93 2.21 1
 -3 19 -5 5.46 1.11 2
 3 19 5 5.46 1.1 3
 3 -19 5 6.17 1.16 1
 -3 -19 -5 5.95 0.96 2
 -4 -19 -5 0.15 0.69 2
 -4 19 -5 -1.21 0.74 2
 4 -19 5 0.84 0.92 1
 4 19 5 -0.7 0.84 3
 -5 -19 -5 21.92 1.63 2
 5 -19 5 22.25 1.92 1
 -5 19 -5 21.45 1.76 2
 5 19 5 18.23 1.6 3
 6 19 5 44.51 2.36 3
 6 -19 5 43.76 2.54 1
 -6 -19 -5 48.81 2.39 2
 -6 19 -5 47.01 2.59 2
 7 -19 5 6.93 1.4 1
 -7 -19 -5 8.69 1.36 2
 -7 19 -5 9.08 1.46 2
 7 19 5 6.5 1.27 3
 -8 19 -5 8.08 1.44 2
 8 19 5 10.79 1.44 3
 8 -19 5 9.24 1.57 1
 -8 -19 -5 10.38 1.46 2
 -9 -19 -5 6.92 1.39 2
 9 19 5 4.32 1.25 3
 -9 19 -5 6.81 1.45 2
 9 -19 5 6.75 1.55 1
 -10 -20 5 6.02 1.44 2
 10 20 -5 5.79 1.34 3
 10 -20 -5 7.23 1.4 1
 9 -20 -5 1.48 1.04 1
 9 20 -5 0.96 1.03 3
 -9 -20 5 -0.54 0.93 2
 -8 -20 5 1.66 1.09 2
 8 20 -5 1.06 0.97 3
 8 -20 -5 1.51 1.01 1
 -7 -20 5 2.61 1.06 2
 7 -20 -5 1.86 0.95 1
 7 20 -5 1.72 1.02 3
 6 -20 -5 6.12 1.15 1
 6 20 -5 7.1 1.2 3
 -6 -20 5 7.26 1.27 2
 5 -20 -5 0.34 0.77 1
 5 20 -5 1.32 0.86 3
 -5 -20 5 0.8 0.86 2
 -4 20 5 16.24 1.42 3
 -4 -20 5 13.91 1.48 2
 4 -20 -5 16.34 1.48 1
 4 20 -5 15.12 1.37 3
 -3 -20 5 1.62 0.84 2
 3 20 -5 2.14 0.79 3
 -3 20 5 2.12 0.9 3
 3 -20 -5 2.13 0.87 1
 -2 20 5 -0.34 0.74 3
 2 20 -5 -0.67 0.64 2
 2 -20 -5 -0.52 0.62 1
 2 20 -5 -0.09 0.61 3
 1 20 -5 6.85 1.13 2
 -1 20 5 8.55 1.19 3
 -1 -20 5 7.82 1.11 1
 1 -20 -5 6.48 0.99 1
 0 20 -5 11.11 1.32 2
 0 -20 -5 11.78 1.16 1
 0 20 5 9.63 1.25 3
 0 -20 5 7.49 1.16 1
 1 20 5 2.74 0.96 3
 1 -20 5 1.38 0.9 1
 -1 -20 -5 2.36 0.75 1
 -1 20 -5 2.21 0.86 2
 2 20 5 0.91 0.85 3
 -2 20 -5 1.67 0.85 2
 2 -20 5 1.05 0.91 1
 -3 -20 -5 5.58 0.99 2
 3 -20 5 5.29 1.14 1
 -3 20 -5 4.19 1.07 2
 3 20 5 5.64 1.06 3
 -4 20 -5 10.15 1.37 2
 -4 -20 -5 10.31 1.19 2
 4 20 5 8.85 1.32 3
 4 -20 5 7.97 1.3 1
 -5 20 -5 26.49 1.99 2
 -5 -20 -5 28.4 1.84 2
 5 -20 5 28.09 2.19 1
 5 20 5 29.88 2 3
 6 -20 5 -0.55 0.94 1
 -6 20 -5 2.3 1.1 2
 -6 -20 -5 1.51 0.97 2
 6 20 5 0.82 0.91 3
 7 -20 5 43.98 2.72 1
 -7 20 -5 50.91 2.78 2
 -7 -20 -5 45.39 2.49 2
 7 20 5 44.08 2.47 3
 -8 20 -5 1.86 1.1 2
 8 20 5 1.07 1.02 3
 8 -20 5 3.2 1.27 1
 -8 -20 -5 1.31 1.02 2
 9 -20 5 0.87 1.19 1
 -9 20 -5 0.82 1.06 2
 9 20 5 0.34 1.01 3
 -9 -20 -5 1.51 1.05 2
 9 21 -5 40.7 2.52 3
 -9 -21 5 38.81 2.69 2
 9 -21 -5 38.55 2.53 1
 8 -21 -5 2.45 1.06 1
 8 21 -5 1.29 0.98 3
 -8 -21 5 1.04 1.03 2
 7 -21 -5 0.5 0.94 1
 -7 -21 5 1.28 0.99 2
 7 21 -5 0.54 0.83 3
 6 -21 -5 0.27 0.83 1
 -6 -21 5 -0.19 0.8 2
 6 21 -5 0.13 0.87 3
 5 -21 -5 2.29 0.9 1
 5 21 -5 2.05 0.95 3
 -5 -21 5 2 1.05 2
 4 -21 -5 5.01 1.07 1
 4 21 -5 3.96 0.97 3
 -4 -21 5 4.21 1.09 2
 -4 21 5 4.58 1.05 3
 3 -21 -5 11.6 1.27 1
 3 21 -5 9.75 1.15 3
 -3 21 5 12.13 1.3 3
 -3 -21 5 10.53 1.38 2
 2 -21 -5 1.78 0.83 1
 2 21 -5 -0.47 0.68 2
 -2 21 5 0.85 0.82 3
 1 -21 -5 45.52 2.11 1
 1 21 -5 43.86 2.32 2
 -1 21 5 41.5 2.09 3
 0 -21 -5 85.56 2.91 1
 0 21 5 90.77 3.13 3
 0 -21 5 87.45 3.01 1
 0 21 -5 84.47 3.21 2
 -1 -21 -5 0.21 0.66 1
 -1 21 -5 2.49 0.95 2
 1 -21 5 0.19 0.86 1
 1 21 5 -1.03 0.8 3
 2 -21 5 -1.07 0.84 1
 2 21 5 -0.44 0.84 3
 -2 21 -5 0.05 0.75 2
 3 21 5 75.29 2.94 3
 3 -21 5 76.34 3.17 1
 -3 21 -5 76.03 3.13 2
 4 21 5 1.22 0.96 3
 -4 21 -5 1 0.92 2
 4 -21 5 1.53 1.1 1
 -4 -21 -5 0.77 0.8 2
 5 -21 5 3.92 1.31 1
 -5 -21 -5 7.97 1.2 2
 -5 21 -5 8.41 1.42 2
 5 21 5 6.69 1.29 3
 6 -21 5 22.95 2.11 1
 -6 21 -5 22.56 2.04 2
 6 21 5 22.28 1.94 3
 -6 -21 -5 25.61 1.83 2
 -7 21 -5 1.23 1.08 2
 -7 -21 -5 2.37 1.13 2
 7 -21 5 4.86 1.44 1
 7 21 5 1.63 1.02 3
 -8 21 -5 19.66 2.03 2
 8 -21 5 19.67 2.04 1
 8 21 5 19.51 1.82 3
 -8 -21 -5 17.77 1.84 2
 8 22 -5 16.55 1.78 3
 8 -22 -5 15.78 1.79 1
 -8 -22 5 12.93 1.75 2
 7 22 -5 14.72 1.65 3
 7 -22 -5 11.03 1.56 1
 -7 -22 5 15.13 1.81 2
 -6 -22 5 25.51 2.15 2
 6 22 -5 28.53 2.03 3
 6 -22 -5 30.29 2.13 1
 5 -22 -5 13.29 1.57 1
 -5 -22 5 13.75 1.62 2
 5 22 -5 16.3 1.55 3
 -4 -22 5 4.64 1.19 2
 4 22 -5 6.16 1.1 3
 4 -22 -5 5.63 1.12 1
 3 -22 -5 1.21 0.83 1
 3 22 -5 1.49 0.86 3
 -3 -22 5 1.08 0.96 2
 -3 22 5 -0.38 0.84 3
 2 22 -5 3.17 1.06 2
 -2 22 5 4.92 1.11 3
 2 -22 -5 4.86 1.04 1
 1 22 -5 4.72 1.11 2
 1 -22 -5 4.25 0.93 1
 -1 22 5 2.64 1.04 3
 0 -22 -5 44.54 2.12 1
 0 22 5 41.45 2.23 3
 0 22 -5 41.82 2.32 2
 0 -22 5 42.17 2.18 1
 1 22 5 23.47 1.76 3
 -1 22 -5 24.19 1.92 2
 1 -22 5 24.68 1.78 1
 2 -22 5 3.38 1.11 1
 2 22 5 4.38 1.07 3
 -2 22 -5 2.51 0.99 2
 3 22 5 36.48 2.23 3
 3 -22 5 37.19 2.37 1
 -3 22 -5 37.19 2.27 2
 4 22 5 11.25 1.51 3
 -4 22 -5 13.22 1.62 2
 4 -22 5 12.49 1.56 1
 5 -22 5 7 1.48 1
 5 22 5 4.57 1.15 3
 -5 22 -5 2.14 1.03 2
 6 22 5 2.86 1.1 3
 6 -22 5 1.63 1.11 1
 -6 22 -5 1.1 1.02 2
 -6 -22 -5 2.07 1.06 2
 7 22 5 0.5 1.04 3
 7 -22 5 -1.95 0.91 1
 -7 -22 -5 1.03 0.96 2
 -7 22 -5 1.38 1.09 2
 -8 -22 -5 -0.4 1.01 2
 8 -22 5 1.05 1.23 1
 8 22 5 -0.2 1.02 3
 -8 22 -5 -0.58 1.05 2
 8 -23 -5 7.14 1.48 1
 8 23 -5 3.89 1.21 3
 -8 -23 5 4.66 1.38 2
 -7 -23 5 7.88 1.49 2
 7 23 -5 10.13 1.48 3
 7 -23 -5 8.05 1.41 1
 6 23 -5 0.73 0.95 3
 6 -23 -5 1.08 0.92 1
 -6 -23 5 -0.27 0.96 2
 5 -23 -5 5.35 1.23 1
 -5 -23 5 3.65 1.22 2
 5 23 -5 3.97 1.09 3
 4 23 -5 1.79 0.96 3
 4 -23 -5 1.7 0.89 1
 -4 -23 5 0.88 0.94 2
 -3 -23 5 1.5 1.01 2
 3 -23 -5 3.63 1.02 1
 -2 23 5 5.09 1.13 3
 2 23 -5 7.45 1.32 2
 2 -23 -5 6.6 1.14 1
 1 23 -5 5.85 1.26 2
 -1 23 5 5.1 1.16 3
 1 -23 -5 4.03 0.97 1
 0 23 -5 9.2 1.38 2
 0 23 5 7.73 1.2 3
 0 -23 -5 6.57 1.07 1
 1 -23 5 12.78 1.47 1
 1 23 5 12.01 1.44 3
 -1 23 -5 12.06 1.51 2
 2 23 5 15.09 1.59 3
 2 -23 5 12.27 1.51 1
 -2 23 -5 12.54 1.6 2
 3 23 5 0.8 1.01 3
 3 -23 5 1.66 1.05 1
 -3 23 -5 1.31 1.01 2
 4 23 5 1.56 1.08 3
 -4 23 -5 4.3 1.26 2
 4 -23 5 2.34 1.13 1
 5 23 5 3.68 1.13 3
 5 -23 5 4.49 1.37 1
 -5 23 -5 4.72 1.26 2
 6 -23 5 11.61 1.68 1
 -6 23 -5 10.25 1.58 2
 6 23 5 8.04 1.4 3
 7 -23 5 3.29 1.27 1
 -7 23 -5 3.62 1.31 2
 7 23 5 2.75 1.26 3
 7 24 -5 1.04 1.02 3
 7 -24 -5 0.28 0.89 1
 -7 -24 5 2.23 1.22 2
 -6 -24 5 -0.61 0.92 2
 6 -24 -5 1.98 0.99 1
 6 24 -5 1.74 1.03 3
 -5 -24 5 3.41 1.25 2
 5 -24 -5 5.25 1.21 1
 5 24 -5 5.55 1.21 3
 4 -24 -5 3.17 1.06 1
 -4 -24 5 3.49 1.28 2
 3 -24 -5 3.57 1.02 1
 -3 -24 5 6 1.32 2
 -2 24 5 1.95 1.1 3
 2 -24 -5 2.52 0.98 1
 -2 -24 5 2.65 1.06 2
 -1 24 5 5.36 1.19 3
 1 24 -5 6.79 1.29 2
 1 -24 -5 4.32 1 1
 0 24 5 0.85 0.91 3
 0 24 -5 -0.62 0.82 2
 1 24 5 -0.17 0.91 3
 -1 24 -5 0.39 0.93 2
 1 -24 5 -1.53 0.87 1
 2 24 5 0.73 1.02 3
 2 -24 5 0.7 1.01 1
 -2 24 -5 -0.98 0.86 2
 3 24 5 3.94 1.19 3
 -3 24 -5 1.38 1 2
 3 -24 5 4.14 1.29 1
 -4 24 -5 0.21 1 2
 4 -24 5 1.36 1.18 1
 4 24 5 -0.03 0.94 3
 5 24 5 2.91 1.2 3
 -5 24 -5 3.33 1.15 2
 5 -24 5 5.02 1.46 1
 6 24 5 1.4 1.15 3
 6 -24 5 0.19 1.13 1
 -6 24 -5 1.19 1.13 2
 6 -25 -5 0.82 0.95 1
 -6 -25 5 0.06 1.14 2
 6 25 -5 -0.34 1 3
 5 -25 -5 0.11 0.86 1
 -5 -25 5 -0.37 1.09 2
 4 -25 -5 5.93 1.28 1
 -4 -25 5 4.65 1.35 2
 3 -25 -5 21.64 1.86 1
 -3 -25 5 15.84 1.81 2
 2 -25 -5 1.12 0.88 1
 -2 -25 5 0.05 0.92 2
 -1 25 5 36.35 2.3 3
 1 -25 -5 38.03 2.18 1
 1 25 -5 43.26 2.61 2
 0 25 5 4.32 1.24 3
 0 25 -5 6.18 1.39 2
 -1 25 -5 8.62 1.46 2
 1 25 5 4.28 1.19 3
 -2 25 -5 33.54 2.36 2
 2 25 5 27.05 2.12 3
 2 -25 5 24.2 1.97 1
 3 -25 5 -0.92 0.91 1
 -3 25 -5 0.52 1.09 2
 3 25 5 0.31 1.01 3
 4 -25 5 35.27 2.54 1
 -4 25 -5 35.4 2.51 2
 4 25 5 33.14 2.35 3
 5 25 5 11.86 1.69 3
 5 -25 5 9.54 1.67 1
 -5 25 -5 11.53 1.68 2
 -4 -26 5 -0.61 1.02 2
 4 -26 -5 2.02 1 1
 3 -26 -5 1.61 0.94 1
 -3 -26 5 -1.29 1.02 2
 2 -26 -5 14.11 1.58 1
 -2 -26 5 13.86 1.81 2
 1 26 -5 6.2 1.39 2
 0 26 -5 3.67 1.3 2
 0 26 5 2.47 1.17 3
 1 26 5 17.48 1.83 3
 -1 26 -5 12.1 1.71 2
 -2 26 -5 3.01 1.25 2
 2 26 5 1.74 1.16 3
 3 -26 5 17.34 1.91 1
 -3 26 -5 18.13 1.95 2
 3 26 5 17.63 1.89 3
 1 27 -5 -1.3 1.06 2
 -1 -27 5 -0.09 1.01 2
 0 27 -5 20.61 2.08 2
 0 27 5 16.41 1.83 3
 -1 27 -5 4.3 1.33 2
 1 27 5 2.25 1.29 3
 -14 0 6 6.12 1.38 2
 14 0 -6 4.51 1.27 3
 -13 0 6 9.98 1.5 2
 13 0 -6 10.08 1.46 3
 -12 0 6 0.28 0.89 2
 12 0 -6 -1.16 0.88 3
 11 0 -6 0.35 0.8 3
 -11 0 6 -0.35 0.73 2
 10 0 -6 6.03 1.06 3
 -10 0 6 4.79 0.94 2
 9 0 -6 4.53 0.88 3
 9 0 -6 4.72 0.66 1
 -9 0 6 5.44 0.89 2
 8 0 -6 0.97 0.46 1
 -8 0 6 -0.1 0.51 2
 8 0 -6 1.11 0.66 3
 7 0 -6 0.35 0.38 1
 7 0 -6 0.31 0.5 3
 -7 0 6 -0.24 0.42 2
 6 0 -6 59.46 1.97 3
 6 0 -6 62 1.71 1
 -6 0 6 63.4 1.83 2
 5 0 -6 76.78 2.2 3
 -5 0 6 81.4 1.98 2
 5 0 -6 83.23 2 1
 4 0 -6 339.21 5.9 3
 4 0 -6 340.85 5.72 1
 -4 0 6 335.4 5.51 2
 -3 0 6 0.56 0.28 2
 3 0 -6 -0.08 0.3 1
 3 0 -6 0.12 0.37 3
 2 0 -6 878.02 13.26 1
 2 0 -6 868.08 13.03 3
 2 0 -6 872.29 12.75 2
 1 0 -6 39.74 1.27 1
 1 0 -6 40.3 0.99 2
 -1 0 6 43.75 1.24 3
 0 0 6 14.15 0.72 3
 0 0 -6 13.93 0.78 1
 0 0 -6 15.56 0.64 2
 -1 0 -6 16.98 0.85 1
 1 0 6 15.12 0.68 3
 -1 0 -6 15.02 0.71 2
 2 0 6 15.2 0.65 3
 -2 0 -6 15.1 0.78 2
 -2 0 -6 16.08 0.84 1
 -3 0 -6 537.7 8.78 1
 -3 0 -6 552.88 8.8 2
 3 0 6 548.44 8.23 3
 -4 0 -6 10.36 0.82 2
 4 0 6 9.47 0.67 3
 4 0 6 10.75 0.79 1
 -5 0 -6 353.25 6.49 2
 5 0 6 348.91 6.14 1
 5 0 6 352.27 5.74 3
 6 0 6 136.13 3.11 1
 -6 0 -6 131.82 3.45 2
 6 0 6 139 2.85 3
 -7 0 -6 7 0.98 2
 7 0 6 8.23 0.88 1
 7 0 6 10.4 0.83 3
 -8 0 -6 4.52 0.96 2
 8 0 6 6.27 0.79 3
 8 0 6 6.15 0.88 1
 -9 0 -6 54.73 2.48 2
 9 0 6 53.74 2.12 1
 -10 0 -6 17.26 1.62 2
 -11 0 -6 36.53 2.31 2
 -12 0 -6 136.81 4.74 2
 -13 0 -6 0.83 1.08 2
 -14 1 6 3.65 1.18 2
 14 1 -6 2.48 1.24 3
 14 -1 -6 3.68 1.31 3
 -14 -1 6 4.78 1.3 2
 13 1 -6 0.77 1.08 3
 13 -1 -6 1.72 1.12 3
 -13 1 6 0.97 1.02 2
 -13 -1 6 -0.1 0.85 2
 -12 1 6 15.85 1.59 2
 12 1 -6 15.72 1.67 3
 -12 -1 6 13.56 1.56 2
 12 -1 -6 13.53 1.51 3
 -11 1 6 0.94 0.87 2
 -11 -1 6 1.6 0.89 2
 11 1 -6 2.12 0.92 3
 11 -1 -6 0.85 0.8 3
 10 1 -6 -0.11 0.73 3
 10 -1 -6 0.33 0.71 3
 -10 -1 6 -1.23 0.57 2
 -10 1 6 0.39 0.68 2
 -9 1 6 23.78 1.47 2
 9 -1 -6 25 1.22 1
 -9 -1 6 22.86 1.43 2
 9 -1 -6 22.68 1.5 3
 9 1 -6 21.61 1.56 3
 -8 -1 6 0.4 0.57 2
 8 -1 -6 0.44 0.45 1
 8 1 -6 0.68 0.43 1
 8 -1 -6 -1.28 0.53 3
 -8 1 6 -0.41 0.45 2
 8 1 -6 -0.6 0.52 3
 7 1 -6 52.91 1.58 1
 -7 -1 6 54.7 1.86 2
 7 1 -6 52.16 1.99 3
 7 -1 -6 49.89 1.91 3
 -7 1 6 53.13 1.78 2
 7 -1 -6 51.75 1.67 1
 6 -1 -6 37.34 1.58 3
 -6 1 6 36.97 1.35 2
 6 1 -6 34.59 1.5 3
 -6 -1 6 38.38 1.41 2
 6 1 -6 36.78 1.26 1
 6 -1 -6 37.74 1.33 1
 5 -1 -6 683.41 10.63 1
 -5 1 6 682.86 10.42 2
 5 1 -6 667.21 10.51 1
 5 1 -6 663.01 10.74 3
 -5 -1 6 693.12 10.56 2
 -4 1 6 450.34 6.94 2
 -4 -1 6 450.13 7.08 2
 4 1 -6 443.89 7.19 1
 4 -1 -6 437.8 7.24 1
 4 1 -6 438.35 7.33 3
 -3 -1 6 160.88 2.89 2
 -3 1 6 158.16 2.73 2
 3 -1 -6 160.14 3.14 1
 3 1 -6 158.54 3.08 1
 3 -1 -6 153.63 3.19 3
 2 -1 -6 619.29 9.49 3
 2 -1 -6 618.74 9.61 1
 2 1 -6 604.24 9.53 1
 -2 1 6 619.23 9.03 2
 -2 1 6 606.86 9.45 3
 2 1 -6 620.76 9.42 3
 2 1 -6 596.68 9.17 2
 1 -1 -6 4368.03 61.83 2
 1 1 -6 4305.37 60.15 3
 1 -1 -6 4269.71 61.91 1
 -1 1 6 4231.14 60.93 3
 1 1 -6 4304.62 61.4 1
 1 1 -6 4296.35 60.89 2
 0 -1 -6 29.09 0.82 2
 0 1 -6 27.77 1.05 1
 0 -1 6 27.46 0.91 3
 0 1 6 29.83 1 3
 0 1 -6 29.34 0.92 2
 0 -1 -6 27.93 1.06 1
 1 -1 6 1662.73 23.92 3
 -1 -1 -6 1723.54 24.29 2
 -1 1 -6 1713.16 24.76 1
 1 1 6 1682.79 24.03 3
 -1 1 -6 1680.6 24.37 2
 -1 -1 -6 1647.15 24.73 1
 2 -1 6 495.15 7.39 3
 -2 -1 -6 487.81 7.79 2
 -2 1 -6 497.46 8.01 1
 -2 -1 -6 493.08 8.01 1
 -2 1 -6 496.33 7.92 2
 2 1 6 492.47 7.55 3
 -3 1 -6 109.28 2.55 2
 -3 -1 -6 113.47 2.54 2
 3 1 6 110.36 2.23 3
 3 -1 6 107.53 2.07 3
 -3 -1 -6 110.9 2.49 1
 3 -1 6 113.5 2.54 1
 -4 -1 -6 216.79 4.26 2
 4 -1 6 215.71 3.61 3
 4 -1 6 207.26 4.09 1
 -4 1 -6 211.7 4.28 2
 4 1 6 213.92 4.08 1
 -4 -1 -6 220.03 4.1 1
 4 1 6 214.2 3.78 3
 5 1 6 8.38 0.68 3
 5 1 6 9.87 0.76 1
 5 -1 6 8.71 0.66 3
 -5 -1 -6 10.08 0.9 2
 5 -1 6 8.33 0.76 1
 -5 1 -6 8.56 0.88 2
 6 -1 6 235.76 4.67 1
 6 1 6 239.17 4.59 1
 -6 1 -6 241.99 5.11 2
 -6 -1 -6 234.36 5 2
 6 -1 6 241.79 4.22 3
 6 1 6 238.1 4.36 3
 7 -1 6 0.5 0.48 3
 7 1 6 1.02 0.59 1
 -7 -1 -6 0.2 0.59 2
 -7 1 -6 1.64 0.7 2
 7 1 6 0.6 0.55 3
 7 -1 6 1.61 0.63 1
 8 -1 6 127.51 2.88 3
 -8 -1 -6 118.08 3.59 2
 8 -1 6 118.24 3.15 1
 -8 1 -6 117.96 3.59 2
 8 1 6 119.35 3.05 1
 8 1 6 124.92 3.01 3
 9 1 6 81.42 2.56 1
 9 -1 6 82.62 2.67 1
 9 1 6 87.94 2.56 3
 -9 1 -6 80.65 3.07 2
 -9 -1 -6 83.08 3.08 2
 10 -1 6 10.87 1.22 1
 -10 -1 -6 10.84 1.39 2
 -10 1 -6 12.69 1.51 2
 -11 -1 -6 35.16 2.27 2
 -11 1 -6 36.11 2.3 2
 -12 1 -6 6.89 1.43 2
 -12 -1 -6 9.54 1.56 2
 -13 -1 -6 37.68 2.64 2
 -13 1 -6 35.57 2.58 2
 14 2 -6 13.27 1.7 3
 -14 -2 6 9.24 1.53 2
 -14 2 6 11.82 1.65 2
 14 -2 -6 9.14 1.58 3
 -13 2 6 101.54 3.68 2
 -13 -2 6 95.86 3.73 2
 13 2 -6 100 3.82 3
 13 -2 -6 88.89 3.62 3
 -12 2 6 19.57 1.75 2
 12 2 -6 17.96 1.78 3
 12 -2 -6 17.97 1.7 3
 -12 -2 6 17.79 1.71 2
 11 2 -6 113.99 3.72 3
 -11 -2 6 117.78 3.72 2
 -11 2 6 122.29 3.68 2
 11 -2 -6 126.16 3.88 3
 10 -2 -6 1.03 0.54 1
 -10 -2 6 -0.45 0.68 2
 10 -2 -6 -0.72 0.69 3
 10 2 -6 1.28 0.81 3
 -10 2 6 0.4 0.63 2
 -9 -2 6 -0.08 0.59 2
 9 -2 -6 1.56 0.57 1
 9 -2 -6 0.59 0.73 3
 9 2 -6 -0.53 0.69 3
 -9 2 6 0.42 0.62 2
 8 -2 -6 151.47 3.83 3
 8 2 -6 161.58 3.94 3
 8 2 -6 156.86 3.21 1
 -8 2 6 157.64 3.64 2
 -8 -2 6 158.67 3.79 2
 8 -2 -6 155.74 3.48 1
 7 -2 -6 2.56 0.54 1
 7 -2 -6 2.57 0.65 3
 -7 -2 6 2.7 0.66 2
 -7 2 6 1.75 0.53 2
 7 2 -6 1.67 0.63 3
 7 2 -6 1.95 0.43 1
 6 -2 -6 -0.55 0.32 1
 6 -2 -6 0.82 0.5 3
 6 2 -6 0.02 0.44 3
 6 2 -6 0.83 0.34 1
 -6 -2 6 -0.09 0.42 2
 -6 2 6 0.37 0.38 2
 5 -2 -6 36.45 1.46 3
 5 2 -6 35.66 1.42 3
 -5 -2 6 36.58 1.32 2
 5 2 -6 36.14 1.2 1
 5 -2 -6 35.57 1.28 1
 -5 2 6 38.98 1.21 2
 4 -2 -6 209.28 4.07 3
 -4 2 6 209.3 3.54 2
 4 2 -6 205.34 3.76 1
 4 -2 -6 207.61 3.92 1
 4 2 -6 203.58 4 3
 -4 -2 6 211.16 3.82 2
 3 -2 -6 233.97 4.3 1
 -3 -2 6 241.45 4.1 2
 3 2 -6 234.1 4.17 1
 3 -2 -6 242.27 4.39 3
 3 2 -6 234.65 4.28 3
 -3 2 6 238.01 3.77 2
 -2 2 6 50.74 0.98 2
 2 2 -6 51 1.3 2
 2 2 -6 50.65 1.45 3
 2 2 -6 46.96 1.37 1
 -2 2 6 52.05 1.52 3
 1 2 -6 969.73 14.93 1
 -1 2 6 1004.51 14.73 3
 1 -2 -6 998.61 15.06 1
 1 2 -6 1003.62 14.57 3
 1 -2 -6 1003.16 14.61 2
 1 2 -6 1002.97 14.66 2
 0 -2 -6 156.66 3.13 1
 0 2 6 156.85 2.95 3
 0 -2 6 157.71 2.78 3
 0 2 -6 152.6 3.06 1
 0 2 -6 156.88 2.92 2
 0 -2 -6 158.27 2.63 2
 -1 2 -6 83.34 1.94 2
 1 -2 6 85.31 1.68 3
 -1 2 -6 83.68 2.03 1
 -1 -2 -6 87.86 1.78 2
 -1 -2 -6 83.96 2.05 1
 1 2 6 87.81 1.89 3
 -2 2 -6 110.91 2.44 2
 -2 -2 -6 107.27 2.41 1
 -2 2 -6 103.15 2.39 1
 2 -2 6 106.29 1.91 3
 -2 -2 -6 103.93 2.23 2
 2 2 6 106.94 2.2 3
 3 -2 6 18.02 0.65 3
 -3 2 -6 16.98 0.95 2
 3 2 6 16.8 0.82 3
 -3 -2 -6 16.33 0.87 2
 -3 -2 -6 16.47 0.87 1
 4 2 6 57.48 1.57 3
 4 -2 6 58.32 1.3 3
 -4 2 -6 53.45 1.83 2
 -4 -2 -6 57.17 1.81 2
 4 -2 6 55.88 1.71 1
 -4 -2 -6 53.73 1.62 1
 -5 -2 -6 2.67 0.62 2
 5 2 6 2.69 0.54 3
 5 -2 6 3.24 0.45 3
 5 -2 6 3.87 0.65 1
 -5 2 -6 3.9 0.67 2
 5 2 6 2.64 0.52 1
 -6 -2 -6 2.39 0.67 2
 6 2 6 2.23 0.54 1
 6 2 6 2.72 0.58 3
 -6 2 -6 1.94 0.66 2
 6 -2 6 2.88 0.64 1
 6 -2 6 3.04 0.49 3
 7 2 6 50.36 1.76 3
 7 -2 6 54.86 2.01 1
 7 -2 6 53.7 1.57 3
 -7 2 -6 51.15 2.17 2
 -7 -2 -6 51.67 2.14 2
 7 2 6 54.58 1.81 1
 8 2 6 104.66 2.73 3
 -8 -2 -6 100.61 3.25 2
 8 2 6 103.44 2.71 1
 -8 2 -6 96.75 3.24 2
 8 -2 6 102.92 2.96 1
 9 -2 6 13.93 1.3 1
 -9 2 -6 13.5 1.47 2
 -9 -2 -6 12.53 1.36 2
 9 2 6 15.32 1.19 3
 10 -2 6 9.83 1.23 1
 -10 -2 -6 9.89 1.35 2
 -10 2 -6 8.45 1.32 2
 -11 2 -6 0.18 0.8 2
 -11 -2 -6 1.36 0.92 2
 -12 2 -6 -0.36 0.9 2
 -12 -2 -6 -1.05 0.83 2
 -13 -2 -6 3.04 1.34 2
 -13 2 -6 6.12 1.47 2
 -14 -3 6 16.4 1.86 2
 14 -3 -6 19.08 1.93 3
 14 3 -6 18.47 2 3
 -14 3 6 14.78 1.7 2
 -13 3 6 11.53 1.53 2
 -13 -3 6 9.51 1.48 2
 13 -3 -6 11.21 1.59 3
 13 3 -6 10.4 1.56 3
 12 -3 -6 149.23 4.48 3
 -12 -3 6 152.8 4.6 2
 -12 3 6 144.72 4.34 2
 12 3 -6 155.72 4.63 3
 -11 -3 6 1.51 0.92 2
 11 -3 -6 1.27 0.95 3
 11 3 -6 1.42 0.97 3
 -11 3 6 1.6 0.85 2
 10 3 -6 22.14 1.7 3
 10 -3 -6 26.14 1.46 1
 -10 3 6 24.56 1.58 2
 -10 -3 6 23.21 1.65 2
 10 -3 -6 25.53 1.66 3
 9 3 -6 173.87 4.39 3
 -9 -3 6 179.66 4.35 2
 -9 3 6 183.09 4.21 2
 9 -3 -6 173.53 3.94 1
 9 -3 -6 187.16 4.47 3
 -8 -3 6 49.68 1.98 2
 8 3 -6 49.13 2.07 3
 8 -3 -6 46.19 2.01 3
 -8 3 6 46.73 1.8 2
 8 -3 -6 46.47 1.73 1
 7 3 -6 31.54 1.56 3
 -7 3 6 31.05 1.33 2
 7 -3 -6 34.5 1.59 3
 -7 -3 6 32.82 1.52 2
 7 -3 -6 32.22 1.4 1
 7 3 -6 31.26 1.14 1
 -6 3 6 1.01 0.41 2
 -6 -3 6 1.76 0.54 2
 6 -3 -6 2.02 0.5 1
 6 -3 -6 1.85 0.56 3
 6 3 -6 1.21 0.55 3
 6 3 -6 1.63 0.37 1
 5 3 -6 0.85 0.48 3
 5 -3 -6 0.55 0.5 3
 5 3 -6 0.36 0.3 1
 -5 3 6 0.38 0.33 2
 -5 -3 6 0.84 0.41 2
 5 -3 -6 1.31 0.41 1
 4 -3 -6 0.04 0.42 3
 -4 3 6 -0.04 0.25 2
 4 3 -6 0.5 0.43 3
 4 -3 -6 0.32 0.33 1
 4 3 -6 -0.06 0.28 1
 -4 -3 6 0.05 0.35 2
 3 3 -6 314.29 5.3 1
 3 -3 -6 321.1 5.53 1
 -3 3 6 314.8 5.53 3
 -3 -3 6 324.7 5.34 2
 -3 3 6 313.82 4.87 2
 3 3 -6 327.97 5.46 3
 2 3 -6 24.82 0.97 3
 -2 3 6 22.97 0.49 2
 2 -3 -6 23.05 0.99 1
 -2 3 6 21.56 1.01 3
 2 3 -6 24.66 0.91 2
 2 3 -6 24.29 0.93 1
 1 3 -6 511.44 8.18 1
 -1 3 6 514.75 8.14 3
 1 -3 -6 519.67 8.33 1
 1 3 -6 524.83 8.07 2
 1 3 -6 520.8 7.93 3
 0 -3 -6 584.71 8.67 2
 0 3 -6 584.75 9.21 1
 0 3 -6 592.37 8.76 3
 0 3 6 591.74 9.04 3
 0 3 -6 578.42 9.05 2
 1 3 6 1920.61 27.55 3
 -1 3 -6 1967.43 27.98 2
 -1 3 -6 1924.37 28.21 1
 -1 -3 -6 1938.06 27.66 2
 -1 -3 -6 1903.72 28.25 1
 1 -3 6 1937.86 27.35 3
 2 -3 6 4.95 0.54 1
 2 -3 6 4.69 0.35 3
 -2 3 -6 5.55 0.57 2
 -2 -3 -6 4.84 0.48 2
 2 3 6 5.03 0.53 3
 -2 -3 -6 4.99 0.54 1
 3 -3 6 605.5 8.85 3
 3 -3 6 621.76 9.76 1
 3 3 6 595.89 9.33 3
 -3 3 -6 598.81 9.79 2
 -3 -3 -6 618.32 9.6 2
 -3 -3 -6 613.3 9.68 1
 4 3 6 26.31 1.12 3
 4 -3 6 24.65 0.74 3
 4 -3 6 25.28 1.21 1
 -4 3 -6 26.03 1.27 2
 -4 -3 -6 24.07 1.14 2
 -4 -3 -6 26.35 1.11 1
 5 -3 6 92.42 2.46 1
 -5 -3 -6 93.71 2.58 2
 5 3 6 91.48 2.27 1
 5 3 6 96.43 2.31 3
 5 -3 6 95.34 1.85 3
 -5 3 -6 91.85 2.65 2
 6 3 6 6.71 0.69 1
 6 -3 6 7.21 0.81 1
 6 3 6 5.31 0.71 3
 6 -3 6 6.89 0.55 3
 -6 3 -6 6.81 0.89 2
 -6 -3 -6 5.91 0.83 2
 -7 -3 -6 24.31 1.52 2
 7 3 6 26.15 1.28 1
 7 -3 6 22.4 1.39 1
 7 3 6 27.15 1.35 3
 -7 3 -6 26.31 1.61 2
 -8 -3 -6 1.9 0.86 2
 -8 3 -6 4.7 0.96 2
 8 3 6 5.16 0.76 1
 8 -3 6 4.09 0.93 1
 8 3 6 5.03 0.85 3
 -9 -3 -6 -0.48 0.66 2
 9 -3 6 -0.55 0.75 1
 9 3 6 0.02 0.62 3
 -9 3 -6 0.41 0.67 2
 10 -3 6 0.49 0.83 1
 -10 3 -6 -0.08 0.81 2
 -10 -3 -6 -0.12 0.77 2
 10 3 6 0.05 0.68 3
 -11 3 -6 3.04 1.05 2
 -11 -3 -6 2.1 0.97 2
 -12 -3 -6 1.46 1.01 2
 -12 3 -6 1.23 1.03 2
 -13 -3 -6 0.05 0.97 2
 -13 3 -6 1.28 1.12 2
 -14 -4 6 0.94 1.1 2
 14 4 -6 0.62 1.06 3
 -13 4 6 7.31 1.27 2
 13 4 -6 4.45 1.3 3
 -13 -4 6 5.23 1.26 2
 13 -4 -6 4.59 1.29 3
 -12 -4 6 1.35 0.94 2
 12 4 -6 -0.06 0.92 3
 12 -4 -6 2.01 1.07 3
 -12 4 6 -0.16 0.82 2
 11 4 -6 4.02 1.04 3
 -11 -4 6 2.62 1 2
 -11 4 6 1.49 0.83 2
 11 -4 -6 0.4 0.83 3
 10 -4 -6 10.53 1.03 1
 -10 4 6 11.33 1.18 2
 10 -4 -6 11.39 1.27 3
 10 4 -6 13.9 1.39 3
 -10 -4 6 11.22 1.23 2
 9 -4 -6 32.73 1.55 1
 -9 4 6 35.69 1.69 2
 9 4 -6 33.03 1.85 3
 9 -4 -6 33.43 1.78 3
 -9 -4 6 34.15 1.78 2
 -8 -4 6 206.32 4.58 2
 8 -4 -6 208.05 4.37 1
 8 -4 -6 204.7 4.6 3
 -8 4 6 197.86 4.37 2
 8 4 -6 208.87 4.7 3
 7 4 -6 27.43 1.04 1
 -7 4 6 28.5 1.3 2
 7 -4 -6 26.87 1.34 1
 7 -4 -6 31.59 1.55 3
 -7 -4 6 28.82 1.44 2
 7 4 -6 29.12 1.51 3
 -6 4 6 138.49 2.91 2
 -6 -4 6 141.14 3.25 2
 6 4 -6 139.46 2.71 1
 6 -4 -6 143.66 3.2 1
 6 -4 -6 138.66 3.33 3
 6 4 -6 138.75 3.32 3
 5 -4 -6 51.14 1.66 1
 -5 -4 6 48.6 1.61 2
 -5 4 6 47.44 1.33 2
 5 -4 -6 45.39 1.66 3
 5 4 -6 49.24 1.32 1
 4 -4 -6 29.66 1.23 1
 -4 4 6 33.54 1.34 3
 4 4 -6 30.75 1.28 3
 4 4 -6 31.14 1.02 1
 -4 -4 6 31.6 1.19 2
 -4 4 6 32.78 0.93 2
 -3 -4 6 1604.8 23.44 2
 3 4 -6 1611.02 23.26 3
 3 -4 -6 1617.92 23.78 1
 -3 4 6 1623.88 23.45 3
 -3 4 6 1598.86 23.11 2
 3 4 -6 1587.74 23.45 1
 2 -4 -6 139.62 2.93 1
 -2 4 6 140.22 2.93 3
 2 4 -6 136.22 2.7 1
 2 4 -6 136.16 2.72 3
 2 4 -6 141.23 2.8 2
 1 4 -6 9.36 0.68 2
 1 4 -6 8.11 0.59 1
 1 -4 -6 8.01 0.66 1
 1 4 -6 7.41 0.56 3
 -1 4 6 8.8 0.74 3
 0 -4 -6 388.84 5.9 2
 0 4 -6 390.95 6.03 3
 0 -4 -6 396.56 6.59 1
 0 4 6 390.87 6.39 3
 0 4 -6 391.43 6.43 2
 0 4 -6 393.66 6.46 1
 -1 -4 -6 24.93 1.05 1
 -1 -4 -6 24.29 0.79 2
 1 -4 6 24.8 1.01 1
 1 -4 6 24.18 0.71 3
 1 4 6 24.06 1.01 3
 -1 4 -6 25.62 1.05 2
 -2 -4 -6 29.31 1.01 2
 -2 -4 -6 28.94 1.13 1
 2 4 6 29.03 1.09 3
 2 -4 6 29.15 0.67 3
 -2 4 -6 31.12 1.24 2
 2 -4 6 29.93 1.15 1
 3 -4 6 33.02 1.3 1
 -3 -4 -6 31.99 1.2 1
 -3 -4 -6 32.55 1.19 2
 -3 4 -6 31.37 1.32 2
 3 -4 6 31.96 0.69 3
 3 4 6 35.06 1.24 3
 4 -4 6 176.11 3.67 1
 -4 -4 -6 175.15 3.5 1
 -4 -4 -6 171.61 3.62 2
 4 4 6 174.3 3.46 3
 -4 4 -6 175.18 3.85 2
 4 -4 6 178.94 2.78 3
 5 -4 6 21.32 0.7 3
 -5 -4 -6 22.39 1.26 2
 -5 -4 -6 22.76 1.04 1
 5 4 6 23.65 1.18 3
 5 -4 6 21.61 1.2 1
 -5 4 -6 22.83 1.31 2
 6 4 6 106.16 2.65 3
 6 4 6 103.18 2.49 1
 -6 -4 -6 109.45 3.02 2
 6 -4 6 108.77 2.91 1
 -6 4 -6 108.91 3.11 2
 6 -4 6 106.77 2.07 3
 -7 4 -6 96.2 3.04 2
 7 4 6 91.12 2.36 1
 7 -4 6 93.79 2.78 1
 7 4 6 91.52 2.54 3
 -7 -4 -6 91.52 2.89 2
 -8 4 -6 146.47 4.15 2
 -8 -4 -6 153.65 4.12 2
 8 4 6 149.47 3.58 3
 8 4 6 146.49 3.3 1
 8 -4 6 153.04 3.88 1
 -9 4 -6 3.42 0.98 2
 9 -4 6 2.19 0.91 1
 9 4 6 1.64 0.74 3
 -9 -4 -6 2.71 0.92 2
 10 4 6 59.18 2.32 3
 -10 -4 -6 58.24 2.73 2
 -10 4 -6 53.92 2.67 2
 10 -4 6 59.62 2.57 1
 -11 -4 -6 10.35 1.46 2
 -11 4 -6 10.01 1.56 2
 11 -4 6 11.23 1.44 1
 -12 -4 -6 1.88 1.07 2
 -12 4 -6 -0.49 0.82 2
 -13 4 -6 -0.16 1.11 2
 -13 -4 -6 0.71 1.05 2
 14 5 -6 14.04 1.85 3
 -14 -5 6 10.95 1.71 2
 13 5 -6 2.64 1.11 3
 -13 -5 6 0.66 1 2
 13 -5 -6 -0.78 1 3
 -13 5 6 1.27 0.95 2
 -12 -5 6 16.92 1.66 2
 12 -5 -6 16.71 1.66 3
 12 5 -6 16.41 1.66 3
 -12 5 6 18.32 1.58 2
 -11 -5 6 4.31 1.04 2
 11 -5 -6 5.35 0.91 1
 11 5 -6 3.59 1.1 3
 -11 5 6 4.6 1 2
 11 -5 -6 4.83 1.12 3
 10 5 -6 0.5 0.79 3
 10 -5 -6 0.77 0.82 3
 -10 5 6 2.03 0.75 2
 10 -5 -6 1.78 0.72 1
 -10 -5 6 3.1 0.89 2
 9 -5 -6 1.49 0.77 3
 9 5 -6 0.65 0.7 3
 -9 5 6 0.13 0.57 2
 9 -5 -6 0.5 0.59 1
 -9 -5 6 0.37 0.69 2
 8 -5 -6 5.54 0.84 1
 -8 -5 6 5.22 0.9 2
 8 5 -6 5.99 0.98 3
 -8 5 6 4.08 0.73 2
 8 -5 -6 5.98 0.95 3
 7 -5 -6 146.13 3.46 1
 7 -5 -6 149.99 3.64 3
 7 5 -6 148.95 3.64 3
 -7 -5 6 147.76 3.59 2
 -7 5 6 154.54 3.3 2
 6 5 -6 20.17 0.78 1
 6 -5 -6 20.89 1.14 1
 6 5 -6 22.21 1.25 3
 6 -5 -6 19.49 1.19 3
 -6 5 6 21.35 1 2
 -6 -5 6 17.66 1.13 2
 5 5 -6 33.06 1.38 3
 -5 -5 6 32.44 1.34 2
 -5 5 6 32.41 1.07 2
 -5 5 6 31.47 1.41 3
 5 5 -6 30.72 0.97 1
 5 -5 -6 31.13 1.32 1
 -4 5 6 92.35 2.42 3
 -4 -5 6 95.22 2.33 2
 4 -5 -6 93.56 2.36 1
 4 5 -6 97.93 2 1
 -4 5 6 97.07 1.88 2
 4 5 -6 92.02 2.33 3
 -3 5 6 494.02 7.37 2
 3 5 -6 503.97 8.04 2
 -3 5 6 487.94 8.08 3
 3 5 -6 496.71 7.92 3
 3 5 -6 497.64 7.74 1
 3 -5 -6 491.47 8.15 1
 2 -5 -6 244.64 4.52 1
 2 5 -6 243.27 4.23 1
 2 5 -6 246.74 4.27 3
 -2 5 6 246.6 4.5 3
 2 5 -6 245.86 4.42 2
 1 -5 -6 485.18 7.99 1
 1 5 -6 488.36 7.78 1
 1 5 -6 495.85 7.88 2
 1 5 -6 486.5 7.5 3
 -1 5 6 492.22 7.86 3
 0 5 -6 42.38 1.37 2
 0 -5 -6 43.06 1.42 1
 0 5 6 44.6 1.42 3
 0 -5 6 42.44 1.31 1
 0 5 -6 43.92 1.09 3
 0 -5 -6 41.51 0.92 2
 -1 5 -6 180.59 3.57 2
 1 5 6 178.33 3.42 3
 1 -5 6 178.19 2.88 3
 -1 -5 -6 178.54 3.52 1
 -1 -5 -6 176 3.05 2
 1 -5 6 175.35 3.44 1
 2 5 6 610.39 9.5 3
 2 -5 6 610.17 9.72 1
 -2 -5 -6 608.1 9.37 2
 -2 -5 -6 615.18 9.73 1
 -2 5 -6 608.15 9.83 2
 -3 -5 -6 25.52 1.07 1
 3 5 6 23.53 1.11 3
 -3 5 -6 23.93 1.19 2
 -3 -5 -6 22.61 1.03 2
 -4 -5 -6 8.79 0.71 1
 -4 -5 -6 8.79 0.78 2
 4 5 6 7.27 0.75 3
 4 -5 6 7.93 0.77 1
 -4 5 -6 10.78 0.92 2
 -5 5 -6 9.39 0.94 2
 5 5 6 9.65 0.88 3
 -5 -5 -6 8.91 0.86 2
 5 -5 6 8.91 0.41 3
 5 -5 6 8.22 0.86 1
 -5 -5 -6 10.17 0.75 1
 -6 5 -6 46.12 2 2
 -6 -5 -6 51.57 2 2
 6 5 6 48.17 1.78 3
 6 5 6 49.34 1.58 1
 6 -5 6 47.4 1.91 1
 -7 -5 -6 52.61 2.15 2
 7 5 6 52.15 1.67 1
 7 -5 6 51.82 2.14 1
 7 5 6 50.52 1.91 3
 -7 5 -6 52.84 2.26 2
 8 -5 6 2.33 0.81 1
 8 5 6 1.95 0.74 3
 -8 -5 -6 1.66 0.79 2
 -8 5 -6 1.79 0.77 2
 -9 5 -6 21.73 1.69 2
 9 5 6 23.6 1.51 3
 -9 -5 -6 19.69 1.66 2
 9 -5 6 18.22 1.51 1
 10 5 6 -0.36 0.72 3
 -10 5 -6 0.08 0.76 2
 -10 -5 -6 0.2 0.75 2
 10 -5 6 -0.12 0.88 1
 -11 -5 -6 10.23 1.5 2
 -11 5 -6 8.3 1.45 2
 11 -5 6 8.94 1.38 1
 11 5 6 12.35 1.31 3
 -12 -5 -6 2.28 1.1 2
 -12 5 -6 3.29 1.33 2
 -13 5 -6 4.83 1.48 2
 -13 -5 -6 6.17 1.5 2
 14 6 -6 -1.1 1.02 3
 -14 -6 6 0.75 1.05 2
 13 6 -6 26.16 2.14 3
 -13 -6 6 25.58 2.12 2
 -12 -6 6 1.16 0.92 2
 -12 6 6 0.28 0.78 2
 12 -6 -6 -0.25 0.88 3
 12 6 -6 0.4 0.99 3
 11 -6 -6 9.67 1.11 1
 11 -6 -6 11.28 1.34 3
 11 6 -6 10.85 1.39 3
 -11 -6 6 7.02 1.24 2
 -11 6 6 5.41 1.02 2
 10 -6 -6 0.97 0.63 1
 10 6 -6 0.16 0.8 3
 -10 6 6 0.79 0.69 2
 10 -6 -6 1.69 0.85 3
 -10 -6 6 0.33 0.72 2
 -9 -6 6 9.74 1.18 2
 9 6 -6 10.13 1.17 3
 9 -6 -6 9.11 1.03 1
 -9 6 6 9.24 1 2
 9 -6 -6 7.22 0.99 3
 8 6 -6 50.11 2.15 3
 -8 6 6 51.3 1.85 2
 8 -6 -6 53.23 2.01 1
 -8 -6 6 52.04 2.1 2
 8 -6 -6 51.1 2.12 3
 -7 -6 6 0.91 0.58 2
 -7 6 6 -0.4 0.6 3
 -7 6 6 1.33 0.5 2
 7 6 -6 0.47 0.58 3
 7 -6 -6 0.55 0.53 1
 6 6 -6 14.32 0.62 1
 -6 -6 6 15.04 1.09 2
 -6 6 6 14.38 1.13 3
 -6 6 6 15.8 0.88 2
 6 -6 -6 16.63 1.09 1
 6 6 -6 13.92 1.06 3
 5 6 -6 1.05 0.28 1
 5 -6 -6 1.6 0.51 1
 -5 6 6 1.15 0.53 3
 5 6 -6 1.51 0.53 3
 -5 6 6 1.27 0.36 2
 -5 -6 6 1.42 0.51 2
 -4 6 6 19.96 1.08 3
 4 6 -6 19.6 1.04 3
 4 6 -6 18.83 0.75 1
 -4 -6 6 20.06 1.06 2
 4 -6 -6 19.28 1.05 1
 -4 6 6 19.29 0.71 2
 3 6 -6 64.43 1.78 3
 3 6 -6 68.7 1.9 2
 -3 6 6 67.71 1.94 3
 -3 6 6 66.73 1.27 2
 3 6 -6 67.62 1.58 1
 2 -6 -6 252.08 4.66 1
 2 6 -6 249.78 4.3 1
 2 6 -6 250.78 4.35 3
 2 6 -6 243.6 4.54 2
 1 -6 -6 47.77 1.51 1
 -1 -6 6 45.37 1.31 1
 -1 6 6 44.14 1.47 3
 1 6 -6 46.47 1.48 2
 1 6 -6 44.2 1.23 3
 0 6 -6 358.19 6.12 2
 0 -6 -6 354.55 6.13 1
 0 -6 6 355.61 5.95 1
 0 6 -6 355.23 5.5 3
 0 -6 -6 343.87 5.37 2
 0 6 6 364.09 6.02 3
 -1 6 -6 30.98 1.25 2
 1 -6 6 33.59 1.2 1
 -1 6 -6 31.24 0.79 3
 1 6 6 30.35 1.19 3
 -1 -6 -6 30.37 0.91 2
 -1 -6 -6 27.96 1.15 1
 -2 -6 -6 28.54 1.02 2
 -2 -6 -6 25.19 1.11 1
 -2 6 -6 27.11 1.24 2
 2 -6 6 26.22 1.14 1
 2 6 6 27.14 1.18 3
 -3 6 -6 57.08 1.9 2
 3 -6 6 58.41 1.82 1
 -3 -6 -6 56.51 1.68 1
 -3 -6 -6 55.95 1.64 2
 3 6 6 58.57 1.75 3
 4 -6 6 71.24 2.15 1
 -4 -6 -6 72.73 1.95 1
 -4 -6 -6 75.11 2.11 2
 -4 6 -6 72.97 2.29 2
 4 6 6 74.47 2.11 3
 5 -6 6 115.79 3.02 1
 5 6 6 112.99 2.82 3
 -5 6 -6 118.18 3.18 2
 -5 -6 -6 119.88 3.01 2
 -5 -6 -6 115.6 2.63 1
 -6 -6 -6 -0.14 0.5 2
 -6 6 -6 0.06 0.5 2
 6 6 6 0.13 0.41 1
 6 -6 6 0.85 0.68 1
 6 6 6 -0.62 0.53 3
 -7 -6 -6 3.87 0.84 2
 7 -6 6 5.23 1 1
 7 6 6 4.52 0.64 1
 7 6 6 3.85 0.74 3
 -7 6 -6 4.57 0.93 2
 8 -6 6 27.04 1.7 1
 8 6 6 27.04 1.56 3
 -8 -6 -6 24.79 1.65 2
 -8 6 -6 32.57 1.9 2
 9 -6 6 2.18 0.97 1
 -9 6 -6 2.99 0.95 2
 -9 -6 -6 5.96 1.1 2
 9 6 6 2.99 0.86 3
 -10 -6 -6 6.16 1.18 2
 10 -6 6 5.43 1.19 1
 -10 6 -6 3.01 1 2
 10 6 6 5.54 1.02 3
 -11 -6 -6 0.51 0.91 2
 -11 6 -6 0.72 0.87 2
 11 -6 6 0.17 0.96 1
 11 6 6 0.76 0.86 3
 -12 6 -6 18.97 2.01 2
 -12 -6 -6 24.43 2.19 2
 -13 -6 -6 1.27 1.09 2
 -13 6 -6 2.33 1.3 2
 14 7 -6 16.41 1.94 3
 -14 -7 6 14.82 1.89 2
 13 7 -6 0.66 1.09 3
 -13 -7 6 0.98 1 2
 -12 -7 6 0.82 0.92 2
 12 7 -6 3.17 1.16 3
 -12 7 6 0.8 0.99 3
 11 -7 -6 -0.37 0.63 1
 -11 7 6 0.83 0.86 3
 -11 7 6 0.34 0.75 2
 -11 -7 6 1.15 0.81 2
 11 7 -6 0.24 0.88 3
 10 -7 -6 2.18 0.7 1
 -10 7 6 1.66 0.75 2
 -10 -7 6 1.29 0.84 2
 -10 7 6 3.14 0.92 3
 10 7 -6 1.85 0.85 3
 9 7 -6 46.63 2.19 3
 9 -7 -6 51.2 2.12 1
 -9 -7 6 50.75 2.23 2
 -9 7 6 50.58 2 2
 -9 7 6 48.84 2.15 3
 -8 7 6 38.79 1.85 3
 8 -7 -6 43.9 1.87 1
 -8 7 6 39.56 1.63 2
 8 7 -6 37.66 1.87 3
 -8 -7 6 40.79 1.91 2
 7 7 -6 185.51 4.31 3
 7 -7 -6 190.88 4.27 1
 -7 7 6 188.17 3.85 2
 -7 7 6 191.2 4.26 3
 -7 -7 6 188.13 4.3 2
 6 7 -6 0.82 0.51 3
 -6 7 6 0 0.37 2
 6 -7 -6 0.48 0.57 1
 -6 -7 6 0.65 0.53 2
 -6 7 6 1.18 0.57 3
 5 -7 -6 44.54 1.69 1
 -5 7 6 46.79 1.32 2
 5 7 -6 44.3 1.66 3
 5 7 -6 46.44 1.12 1
 -5 -7 6 43.07 1.66 2
 -5 7 6 44.3 1.67 3
 4 -7 -6 159.5 3.53 1
 -4 7 6 165.25 2.89 2
 -4 -7 6 160.02 3.5 2
 -4 7 6 159.52 3.53 3
 4 7 -6 164.27 3.45 3
 3 -7 -6 227.89 4.43 1
 -3 7 6 225.64 3.57 2
 3 7 -6 226.14 4.2 3
 -3 -7 6 221.38 3.86 1
 -3 7 6 227.6 4.38 3
 3 7 -6 226.96 4.39 2
 2 7 -6 103.23 2.46 2
 -2 7 6 98.27 1.64 2
 2 7 -6 95.9 2.19 3
 2 -7 -6 101.68 2.47 1
 -2 -7 6 99.76 2.12 1
 -1 7 6 64.51 1.85 3
 -1 -7 6 65.38 1.67 1
 1 7 -6 65.67 1.88 2
 1 -7 -6 64.62 1.19 2
 1 7 -6 64.43 1.56 3
 1 -7 -6 66.45 1.86 1
 0 -7 -6 64.05 1.32 2
 0 7 -6 64.47 1.88 2
 0 -7 -6 66.11 1.84 1
 0 -7 6 62.79 1.7 1
 0 7 -6 63.82 1.41 3
 -1 7 -6 3.39 0.3 3
 -1 7 -6 2.93 0.54 2
 -1 -7 -6 3.09 0.49 1
 1 7 6 2.42 0.5 3
 -1 -7 -6 3.28 0.38 2
 1 -7 6 3.06 0.5 1
 -2 -7 -6 7.23 0.67 1
 -2 7 -6 8.05 0.77 2
 -2 -7 -6 8.26 0.62 2
 2 7 6 8.8 0.74 3
 2 -7 6 7.52 0.71 1
 -3 7 -6 -0.09 0.39 2
 3 -7 6 0.14 0.46 1
 3 7 6 0.29 0.5 3
 -3 -7 -6 -0.21 0.35 2
 -3 -7 -6 0 0.36 1
 -4 7 -6 84.35 2.53 2
 4 -7 6 81.22 2.39 1
 -4 -7 -6 83.01 2.25 2
 4 7 6 82.29 2.31 3
 -4 -7 -6 82.3 2.12 1
 5 -7 6 3.38 0.75 1
 -5 -7 -6 2.66 0.65 2
 -5 -7 -6 3.99 0.55 1
 5 7 6 3.78 0.75 3
 -5 7 -6 2.75 0.71 2
 6 7 6 35.64 1.68 3
 -6 -7 -6 37.9 1.73 2
 6 -7 6 39.86 1.85 1
 -6 7 -6 38.78 1.86 2
 -6 -7 -6 39.47 1.38 1
 -7 -7 -6 125.19 3.51 2
 -7 7 -6 120.26 3.62 2
 7 -7 6 125.72 3.52 1
 7 7 6 128.2 3.3 3
 8 -7 6 37.66 2.02 1
 8 7 6 39.5 1.88 3
 -8 -7 -6 41.65 2.07 2
 -8 7 -6 43.72 2.2 2
 -9 7 -6 28.28 1.93 2
 -9 -7 -6 29.7 1.89 2
 9 7 6 25.87 1.66 3
 9 -7 6 29.56 1.96 1
 10 -7 6 0.26 0.96 1
 10 7 6 1.82 0.85 3
 -10 -7 -6 1.05 0.86 2
 -10 7 -6 1.56 0.94 2
 11 -7 6 -1.59 0.87 1
 -11 7 -6 0.49 0.89 2
 -11 -7 -6 -0.87 0.82 2
 11 7 6 0.66 0.86 3
 -12 7 -6 0.25 1 2
 -12 -7 -6 0.67 0.83 2
 12 7 6 1.56 1 3
 12 -7 6 1.46 1.17 1
 -13 -7 -6 4.42 1.37 2
 -13 7 -6 6.65 1.51 2
 14 8 -6 0.52 1.09 3
 -14 -8 6 -0.38 1.04 2
 -13 -8 6 6.66 1.35 2
 13 8 -6 4.95 1.34 3
 -12 -8 6 -0.36 0.89 2
 12 8 -6 -0.86 0.91 3
 12 -8 -6 0.07 0.72 1
 -11 8 6 1.93 0.93 3
 11 8 -6 0.87 0.96 3
 11 -8 -6 1.19 0.79 1
 -11 -8 6 2.23 0.98 2
 -10 -8 6 5.94 1.1 2
 10 8 -6 7.86 1.18 3
 -10 8 6 9.98 1.12 2
 -10 8 6 8.43 1.15 3
 10 -8 -6 10.4 1.13 1
 -9 8 6 21.69 1.51 3
 -9 8 6 20.86 1.34 2
 -9 -8 6 18.84 1.49 2
 9 8 -6 23.59 1.68 3
 9 -8 -6 21.07 1.51 1
 -8 8 6 32.07 1.47 2
 8 8 -6 33.52 1.84 3
 8 -8 -6 32.17 1.74 1
 -8 8 6 31.61 1.66 3
 -7 8 6 12.85 1.14 3
 7 -8 -6 13.85 1.15 1
 -7 8 6 12.89 0.96 2
 -7 -8 6 12.86 1.14 2
 7 8 -6 11.43 1.09 3
 6 8 -6 66.41 2.25 3
 -6 -8 6 64.07 2.21 2
 6 -8 -6 64.74 2.21 1
 -6 8 6 65.65 1.82 2
 -6 8 6 66.22 2.21 3
 -5 -8 6 0.41 0.48 2
 5 8 -6 0.07 0.47 3
 5 -8 -6 0.27 0.47 1
 -5 8 6 0.05 0.54 3
 -5 8 6 0.42 0.36 2
 -5 -8 6 0.46 0.26 1
 4 -8 -6 145 3.39 1
 4 8 -6 145.74 3.27 3
 -4 -8 6 150.13 2.69 1
 -4 8 6 150.82 2.73 2
 -4 8 6 148.11 3.36 3
 -4 -8 6 152.43 3.42 2
 3 8 -6 378.75 6.48 3
 -3 8 6 378.75 6.68 3
 3 8 -6 387.41 6.77 2
 -3 -8 6 382.24 6.13 1
 -3 8 6 381.35 5.86 2
 3 -8 -6 401.74 6.87 1
 -2 -8 6 420.54 6.77 1
 -2 8 6 420.02 6.3 2
 2 -8 -6 439.17 7.33 1
 -2 8 6 416.49 7.16 3
 2 8 -6 424.7 6.85 3
 2 8 -6 414.01 7.22 2
 1 8 -6 132.81 3.08 2
 1 8 -6 140.9 2.69 3
 1 -8 -6 138.17 2.32 2
 -1 8 6 139.98 3.07 3
 -1 -8 6 139.83 2.81 1
 1 -8 -6 132.42 3.02 1
 0 8 -6 158.72 3.45 2
 0 8 -6 153.72 2.78 3
 0 -8 -6 162.03 3.38 1
 0 -8 -6 159.51 2.75 2
 0 8 6 160.18 3.34 3
 0 -8 6 157.49 3.2 1
 -1 -8 -6 0.29 0.28 2
 -1 8 -6 0.01 0.35 2
 1 -8 6 0.94 0.42 1
 -1 8 -6 0.41 0.21 3
 -1 -8 -6 0.45 0.35 1
 1 8 6 0.31 0.43 3
 2 8 6 6.45 0.71 3
 -2 -8 -6 6.46 0.66 1
 -2 -8 -6 6.69 0.58 2
 -2 8 -6 5.84 0.75 2
 2 -8 6 6.29 0.73 1
 3 -8 6 7.74 0.81 1
 -3 -8 -6 8.24 0.7 1
 -3 -8 -6 7.53 0.69 2
 -3 8 -6 6.07 0.77 2
 3 8 6 7.81 0.79 3
 -4 8 -6 2.52 0.65 2
 -4 -8 -6 2.66 0.59 2
 4 -8 6 2.33 0.71 1
 -4 -8 -6 2.27 0.49 1
 4 8 6 2.72 0.65 3
 5 8 6 6.96 0.89 3
 5 -8 6 6.05 0.9 1
 -5 -8 -6 5.84 0.64 1
 -5 8 -6 6.54 0.89 2
 -5 -8 -6 6.06 0.77 2
 6 8 6 0.55 0.67 3
 -6 -8 -6 -0.01 0.55 2
 6 -8 6 0.91 0.75 1
 -6 8 -6 0.04 0.59 2
 -6 -8 -6 0.99 0.45 1
 7 8 6 106.75 3.05 3
 -7 -8 -6 111.85 3.3 2
 7 -8 6 115.14 3.42 1
 -7 8 -6 112.08 3.51 2
 8 8 6 8.87 1.04 3
 8 -8 6 7.95 1.18 1
 -8 -8 -6 6.8 1.07 2
 -8 8 -6 6.51 1.11 2
 9 8 6 1.05 0.81 3
 -9 -8 -6 -0.78 0.63 2
 -9 8 -6 0.31 0.78 2
 9 -8 6 1.04 0.91 1
 -10 8 -6 3.13 1.04 2
 10 -8 6 0.58 0.91 1
 -10 -8 -6 2.52 1.05 2
 10 8 6 2.62 0.94 3
 -11 8 -6 1.78 1.01 2
 -11 -8 -6 1.02 1.02 2
 11 8 6 0.15 0.88 3
 11 -8 6 2.12 1.15 1
 -12 -8 -6 4.86 1.36 2
 12 8 6 5.03 1.19 3
 -12 8 -6 4.02 1.31 2
 12 -8 6 3.81 1.3 1
 -13 8 -6 0.48 1.06 2
 -13 -8 -6 0.82 1.15 2
 -13 -9 6 9.83 1.56 2
 13 9 -6 8.06 1.48 3
 12 -9 -6 6.61 1.2 1
 12 9 -6 6.78 1.4 3
 -12 -9 6 4.85 1.3 2
 11 9 -6 -0.15 0.8 3
 -11 -9 6 0.72 0.91 2
 11 -9 -6 0.4 0.8 1
 -11 9 6 -0.92 0.85 3
 10 -9 -6 2.98 0.88 1
 10 9 -6 1.11 0.82 3
 -10 -9 6 1.79 0.95 2
 -10 9 6 3.08 0.93 3
 -9 -9 6 10.48 1.21 2
 -9 9 6 11.35 1.2 3
 -9 9 6 15.63 1.19 2
 9 -9 -6 13.34 1.25 1
 9 9 -6 15.22 1.43 3
 8 -9 -6 0.41 0.66 1
 -8 9 6 0.97 0.73 3
 8 9 -6 1.61 0.78 3
 -8 9 6 1.66 0.64 2
 -8 -9 6 0.57 0.66 2
 -7 9 6 53.43 1.79 2
 -7 -9 6 51.36 2.15 2
 7 9 -6 51.26 2.09 3
 -7 9 6 50.7 1.99 3
 7 -9 -6 53.08 2.14 1
 -6 -9 6 169.29 4.05 2
 -6 9 6 175.84 3.51 2
 6 -9 -6 168.26 4.06 1
 -6 9 6 169.86 3.94 3
 6 9 -6 176.03 4.03 3
 5 -9 -6 140.97 3.49 1
 -5 9 6 136.83 3.36 3
 -5 -9 6 147.83 3.53 2
 -5 -9 6 143.36 2.48 1
 5 9 -6 139.29 3.33 3
 -5 9 6 140.57 2.83 2
 -4 -9 6 15.36 0.71 1
 -4 9 6 16.38 0.74 2
 4 9 -6 14.65 1.01 3
 -4 -9 6 15.83 1.08 2
 4 -9 -6 14.18 1.07 1
 -4 9 6 14.91 1.04 3
 -3 9 6 4.73 0.71 3
 3 9 -6 4.67 0.63 3
 -3 -9 6 4.8 0.49 1
 3 9 -6 3.79 0.65 2
 3 -9 -6 2.33 0.59 1
 -3 9 6 4.8 0.39 2
 2 9 -6 0.18 0.36 3
 -2 9 6 0.35 0.21 2
 -2 -9 6 0.46 0.38 1
 2 9 -6 0.1 0.4 2
 2 -9 -6 0.2 0.41 1
 -2 9 6 -0.45 0.43 3
 -1 -9 6 93.41 2.18 1
 -1 9 6 94.23 2.43 3
 1 -9 -6 94.48 1.77 2
 1 -9 -6 95.4 2.44 1
 1 9 -6 87.24 2.44 2
 1 9 -6 93.72 2.07 3
 0 -9 -6 184.74 3.17 2
 0 9 -6 188.15 3.94 2
 0 -9 6 186.17 3.65 1
 0 9 6 177.21 3.76 3
 0 -9 -6 180.34 3.75 1
 0 9 -6 184.54 3.21 3
 1 -9 6 39.16 1.46 1
 -1 9 -6 35.99 0.92 3
 -1 -9 -6 35.29 1.37 1
 1 9 6 36.32 1.48 3
 -1 -9 -6 39.54 1.17 2
 -2 -9 -6 90.85 2.13 2
 2 9 6 96.21 2.5 3
 2 -9 6 87.62 2.41 1
 -2 9 -6 86.9 2.53 2
 -2 -9 -6 91.44 2.34 1
 -3 9 -6 7.77 0.87 2
 3 9 6 8.52 0.9 3
 3 -9 6 7.98 0.9 1
 -3 -9 -6 9.77 0.78 2
 -3 -9 -6 8.55 0.73 1
 4 -9 6 64 2.22 1
 -4 -9 -6 64.93 1.87 1
 4 9 6 62.82 2.09 3
 -4 -9 -6 65.99 2.03 2
 -4 9 -6 66.14 2.3 2
 -5 9 -6 12.75 1.17 2
 -5 -9 -6 14.26 0.89 1
 -5 -9 -6 13.16 1.08 2
 5 9 6 15.58 1.25 3
 5 -9 6 14.64 1.22 1
 6 9 6 9.02 0.99 3
 -6 -9 -6 9.36 0.75 1
 -6 -9 -6 10.43 1.08 2
 6 -9 6 8.35 1.09 1
 -6 9 -6 8.3 1.06 2
 -7 -9 -6 16.61 1.35 2
 7 9 6 17.79 1.34 3
 7 -9 6 16.69 1.5 1
 -7 9 -6 19.72 1.59 2
 -8 -9 -6 0.53 0.71 2
 -8 9 -6 0.3 0.72 2
 8 -9 6 0.61 0.9 1
 8 9 6 2.43 0.83 3
 9 -9 6 2.42 1.05 1
 -9 9 -6 0.87 0.81 2
 -9 -9 -6 0.62 0.82 2
 9 9 6 1.04 0.81 3
 -10 -9 -6 -0.32 0.72 2
 -10 9 -6 1.75 0.96 2
 10 -9 6 -0.13 0.88 1
 10 9 6 -0.87 0.66 3
 -11 9 -6 26.22 2.2 2
 -11 -9 -6 24.44 2.11 2
 11 9 6 28.13 1.99 3
 11 -9 6 28.31 2.22 1
 12 9 6 4.43 1.2 3
 12 -9 6 8.51 1.47 1
 -12 9 -6 4.73 1.35 2
 -12 -9 -6 8.31 1.52 2
 13 10 -6 1.34 1.09 3
 -13 -10 6 2.35 1.18 2
 -12 -10 6 -0.23 0.88 2
 12 10 -6 0.32 1.07 3
 12 -10 -6 -0.26 0.72 1
 -11 -10 6 54.8 2.69 2
 11 10 -6 55.31 2.72 3
 11 -10 -6 58.47 2.61 1
 10 -10 -6 1.1 0.77 1
 -10 -10 6 1.18 0.81 2
 -10 10 6 1.27 0.84 3
 10 10 -6 0.89 0.8 3
 -9 -10 6 0.57 0.69 2
 9 10 -6 -0.72 0.66 3
 -9 10 6 -0.86 0.65 3
 9 -10 -6 -0.46 0.61 1
 8 -10 -6 22.14 1.51 1
 -8 -10 6 20.85 1.55 2
 -8 10 6 20.47 1.24 2
 8 10 -6 22.52 1.57 3
 -8 10 6 22.42 1.51 3
 -7 10 6 49.98 2.02 3
 -7 -10 6 47.72 2.1 2
 -7 10 6 48.43 1.71 2
 7 10 -6 45.09 2 3
 7 -10 -6 47.89 2.1 1
 6 -10 -6 98.25 2.99 1
 -6 -10 6 99.46 2.97 2
 6 10 -6 107.66 2.98 3
 -6 10 6 103.94 2.48 2
 -6 10 6 97.2 2.83 3
 5 -10 -6 362.81 7.11 1
 5 10 -6 391.33 6.99 3
 -5 10 6 369.54 6.91 3
 -5 10 6 399.34 6.39 2
 -5 -10 6 392.89 7.19 2
 4 10 -6 443.6 7.73 3
 -4 10 6 461.81 7.13 2
 -4 -10 6 442.36 7.98 2
 -4 10 6 450.5 7.83 3
 4 -10 -6 450.99 8.05 1
 -4 -10 6 460.46 7.06 1
 -3 -10 6 392.25 6.2 1
 3 -10 -6 376.85 6.9 1
 -3 10 6 374.88 5.94 2
 -3 10 6 386.26 6.8 3
 3 10 -6 375.16 6.92 2
 3 10 -6 380.88 6.56 3
 2 -10 -6 92.27 2.53 1
 -2 10 6 97.51 2.55 3
 -2 10 6 94.8 1.84 2
 -2 -10 6 97.28 2.19 1
 2 10 -6 92.76 2.59 2
 2 10 -6 95.35 2.27 3
 -1 10 6 512.34 8.53 3
 1 -10 -6 518.54 7.77 2
 1 10 -6 509.08 8.72 2
 -1 -10 6 513.81 8.29 1
 1 -10 -6 517.22 8.65 1
 1 10 -6 501.98 8.01 3
 0 -10 -6 588.19 8.9 2
 0 10 6 588.48 9.55 3
 0 -10 -6 598.35 9.64 1
 0 -10 6 575.55 9.44 1
 0 10 -6 579.12 9.78 2
 0 10 -6 577.86 8.83 3
 1 -10 6 5.43 0.7 1
 1 10 6 4.62 0.73 3
 -1 -10 -6 5.74 0.55 2
 -1 -10 -6 4.83 0.62 1
 -1 10 -6 5.25 0.73 2
 -1 10 -6 6.13 0.45 3
 -2 10 -6 4.1 0.7 2
 2 10 6 4.61 0.71 3
 -2 -10 -6 4.66 0.57 2
 -2 10 -6 4.42 0.3 3
 2 -10 6 3.83 0.71 1
 -2 -10 -6 4.2 0.58 1
 -3 10 -6 23.84 1.37 2
 -3 -10 -6 22.8 1.12 1
 3 10 6 22.64 1.29 3
 -3 -10 -6 19.91 1.09 2
 3 -10 6 21.95 1.34 1
 4 10 6 0.52 0.62 3
 -4 -10 -6 -0.04 0.46 2
 -4 -10 -6 0.53 0.44 1
 -4 10 -6 -0.25 0.5 2
 4 -10 6 -0.85 0.55 1
 -5 -10 -6 2.69 0.57 1
 -5 -10 -6 3.98 0.73 2
 5 -10 6 4.16 0.89 1
 -5 10 -6 3.45 0.81 2
 5 10 6 4.61 0.86 3
 -6 -10 -6 10.68 1.13 2
 -6 10 -6 11.66 1.25 2
 6 -10 6 9.39 1.15 1
 6 10 6 12.55 1.19 3
 7 -10 6 -0.14 0.74 1
 7 10 6 0.79 0.78 3
 -7 -10 -6 -0.26 0.66 2
 -7 10 -6 -0.36 0.61 2
 8 10 6 23.34 1.64 3
 -8 10 -6 20.23 1.66 2
 8 -10 6 21.08 1.78 1
 -8 -10 -6 24.88 1.7 2
 9 10 6 20.58 1.65 3
 9 -10 6 19.79 1.76 1
 -9 -10 -6 21.71 1.79 2
 -9 10 -6 23.18 1.84 2
 10 -10 6 5.52 1.27 1
 10 10 6 6.14 1.19 3
 -10 10 -6 6.47 1.3 2
 -10 -10 -6 7.81 1.31 2
 11 10 6 2.79 1.11 3
 11 -10 6 3.42 1.19 1
 -11 -10 -6 2.08 1.07 2
 -11 10 -6 2.62 1.2 2
 -12 -10 -6 0.55 0.98 2
 12 -10 6 -0.94 1.06 1
 -12 10 -6 -0.03 1.06 2
 12 10 6 -1.94 0.86 3
 13 -11 -6 2.07 1 1
 -13 -11 6 -0.25 1.01 2
 13 11 -6 -1.01 0.91 3
 12 -11 -6 23.25 1.89 1
 12 11 -6 25.11 2.07 3
 -12 -11 6 20.89 1.93 2
 11 -11 -6 -0.14 0.67 1
 11 11 -6 1.43 1.01 3
 -11 -11 6 -0.74 0.8 2
 -10 -11 6 22.95 1.85 2
 -10 11 6 23.23 1.67 3
 10 -11 -6 21.29 1.71 1
 10 11 -6 19.82 1.67 3
 -9 11 6 1.54 0.81 3
 9 -11 -6 1.4 0.81 1
 9 11 -6 1.01 0.83 3
 -9 -11 6 0.66 0.81 2
 8 11 -6 177.65 4.55 3
 8 -11 -6 174.86 4.54 1
 -8 11 6 187.04 4.37 3
 -8 -11 6 179.76 4.61 2
 7 -11 -6 39.09 1.92 1
 -7 11 6 37.51 1.75 3
 7 11 -6 38.79 1.92 3
 -7 -11 6 32.14 1.78 2
 6 11 -6 0.13 0.59 3
 -6 -11 6 1.63 0.71 2
 6 -11 -6 -0.09 0.61 1
 -6 11 6 0.29 0.44 2
 -6 11 6 0.32 0.63 3
 5 11 -6 165.23 3.86 3
 -5 -11 6 173.14 4.08 2
 5 -11 -6 166.66 4.05 1
 -5 11 6 172.32 3.35 2
 -5 11 6 163.29 3.83 3
 -4 11 6 76.6 2.36 3
 4 -11 -6 70.66 2.38 1
 -4 -11 6 75.27 2.43 2
 -4 11 6 79.39 1.83 2
 4 11 -6 73.23 2.26 3
 -4 -11 6 76.56 1.77 1
 3 11 -6 294.92 5.43 3
 3 -11 -6 296.35 5.77 1
[truncated: 563,230 more chars]
